# Supplementary material for: Evolution of the electronic structure in open-shell donor-acceptor organic semiconductors
Source: PubMed Central journal article supplement (PMC8497548; doi:10.1038/s41467-021-26173-3), 2021-10-07
Supplement: 41467_2021_26173_MOESM1_ESM.pdf [file 41467_2021_26173_MOESM1_ESM.pdf]

## Evolution of the Electronic Structure in Open-Shell Donor-Acceptor Organic Semiconductors

*Zhongxin Chen,<sup>1#</sup> Wenqiang Li,<sup>1#</sup> Md Abdus Sabuj,<sup>2#</sup> Yuan Li,<sup>1\*</sup> Weiya Zhu,<sup>1</sup> Miao Zeng,<sup>1</sup> Chandra S. Sarap,<sup>2</sup> Md Masrul Huda,<sup>2</sup> Xianfeng Qiao,<sup>1</sup> Xiaobin Peng,<sup>1</sup> Dongge Ma,<sup>1</sup> Yuguang Ma,<sup>1</sup> Neeraj Rai,<sup>2\*</sup> and Fei Huang<sup>1\*</sup>*

### Affiliations

<sup>1</sup> Institute of Polymer Optoelectronic Materials and Devices, State Key Laboratory of Luminescent Materials and Devices, South China University of Technology, Guangzhou 510640, P. R. China

<sup>2</sup> Dave C. Swalm School of Chemical Engineering and Center for Advanced Vehicular Systems, Mississippi State University, Mississippi State, MS 39762, United States.

E-mail: celiy@scut.edu.cn, neerajrai@che.msstate.edu, msfhuang@scut.edu.cn

Table of contents

|                                                                            |      |
|----------------------------------------------------------------------------|------|
| 1. Molecular structures and synthetic details.....                         | S3   |
| 1.1. Molecular structures .....                                            | S3   |
| 1.2. Materials and methods.....                                            | S4   |
| 2. Results .....                                                           | S15  |
| 2.1. HPLC, UV-vis-NIR absorption, PL emission and CV spectra.....          | S15  |
| 2.2. Theoretical calculations.....                                         | S18  |
| 2.3. Electron spin resonance spectra.....                                  | S30  |
| 2.4. X-ray crystallography and packing motifs of the single crystals ..... | S36  |
| 2.5. X-ray crystallographic data for TPAOMe-TDPP.....                      | S39  |
| 2.6. X-ray crystallographic data for Py-TDPP .....                         | S50  |
| 2.7. X-ray crystallographic data for An-TDPP.....                          | S61  |
| 2.8. X-ray crystallographic data for Flu-TDPP .....                        | S67  |
| 2.9. X-ray crystallographic data for TPAOMe-TDPP-C4.....                   | S85  |
| 2.10. X-ray crystallographic data for Flu-TDPP-C8 .....                    | S93  |
| 2.11. <sup>1</sup> H, <sup>13</sup> C NMR and mass spectra.....            | S116 |
| 2.12 Optimized coordinates.....                                            | S143 |
| Reference.....                                                             | S167 |

## 1. Molecular structures and synthetic details

## 1.1. Molecular structures

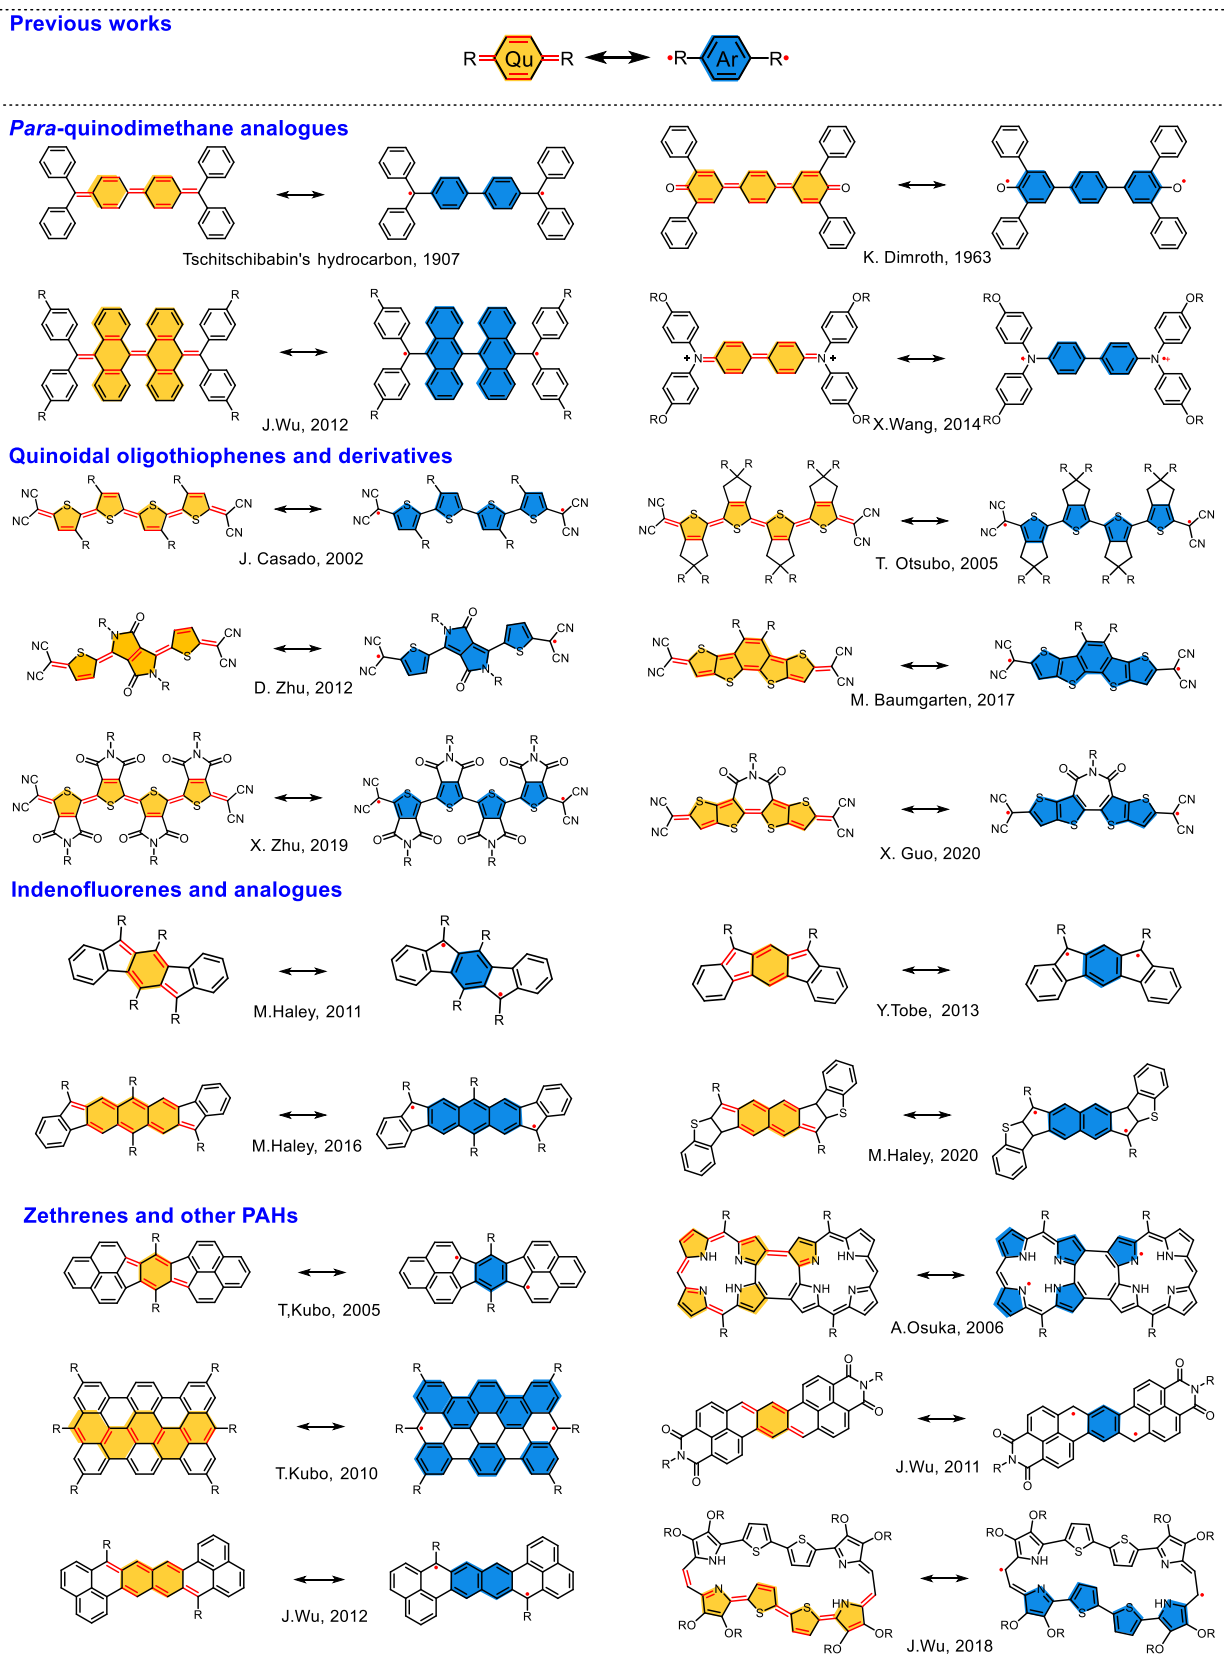

**Supplementary Figure 1.** The molecular structures of open-shell species in previous work including *para*-quinodimethane analogues,<sup>1-2</sup> quinoidal oligothiophenes and derivatives,<sup>3-8</sup> indenofluorenes based materials,<sup>9-11</sup> and quinoidal polycyclic aromatic hydrocarbons.<sup>12-15</sup>

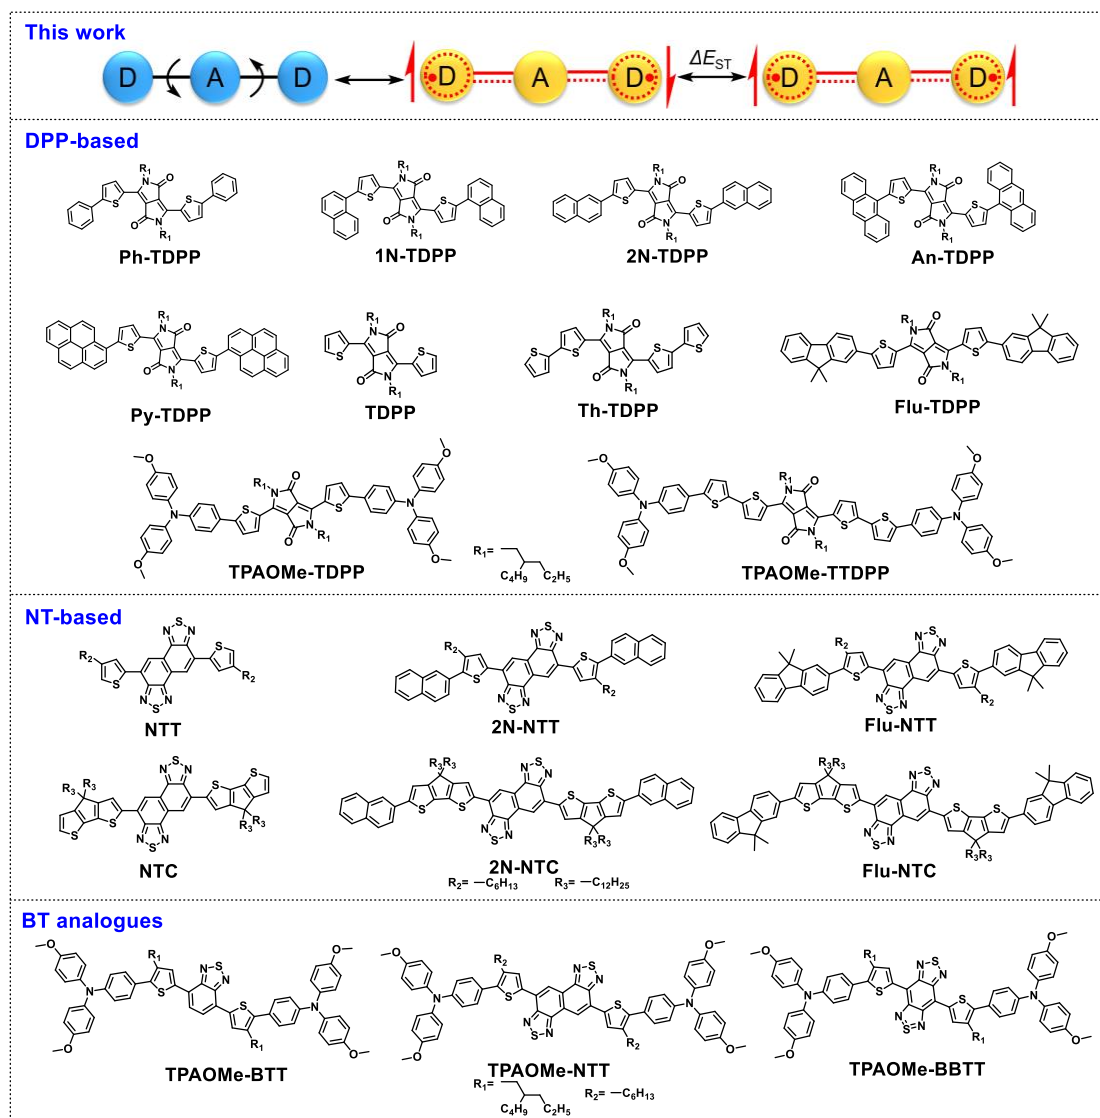

**Supplementary Figure 2.** The molecular structures considered in this work including DPP-based and NT-based small molecules, BT, and BBT analogues.

## 1.2. Materials and methods

**General remarks.** All manipulations of air/and or moisture-sensitive compounds were performed under an inert atmosphere in a nitrogen-filled glovebox, or using standard Schlenk techniques. Reagents, unless otherwise specified, were purchased from Sigma-Aldrich and SunaTech Inc. and used without further purification. Chloroform ( $\text{CHCl}_3$ ), dichloromethane, hexanes, and acetonitrile were degassed and dried over 4 Å molecular sieves prior to use. Deuterated solvents (chloroform- $d$ , dichloromethane- $d_2$ ) were purchased from Aldrich and used as received. Tetrakis(triphenylphosphine)palladium (0) was purchased from TCI Shanghai and used as received. 4*H*-cyclopenta[2,1-*b*:3,4-*b'*]dithiophene (CPDT),<sup>16</sup> 4,4-didodecyl-4*H*-cyclopenta[2,1-*b*:3,4-*b'*]dithiophene ( $\text{C}_{12}$ -CPDT),<sup>17</sup> tributyl(4,4-didodecyl-4*H*-cyclopenta[2,1-*b*:3,4-*b'*]dithiophen-2-yl)stannane ( $\text{C}_{12}$ -CPDT-Sn),<sup>16</sup> 5,10-dibromonaphtho[1,2-*c*:5,6-*c'*]bis([1,2,5]thiadiazole) ( $\text{NT-Br}_2$ ), 5,10-bis(4-hexylthiophen-2-yl)naphtho[1,2-*c*:5,6-*c'*]bis([1,2,5]thiadiazole) (NTT) and the dibromosubstituted precursor 5,10-bis(5-bromo-4-hexylthiophen-2-yl)naphtho[1,2-*c*:5,6-*c'*]bis([1,2,5]thiadiazole) ( $\text{NTT-Br}_2$ )<sup>18</sup> were prepared according to literature procedures. 2,5-bis(2-ethylhexyl)-3,6-di(thiophen-2-yl)-2,5-dihydropyrrolo[3,4-*c*]pyrrole-1,4-dione (TDPP) was commercially available. 2,5-bis(2-ethylhexyl)-3,6-bis(5-phenylthiophen-2-yl)-2,5-dihydropyrrolo[3,4-*c*]pyrrole-1,4-dione (Ph-TDPP), 2,5-bis(2-ethylhexyl)-3,6-bis(5-(naphthalen-1-yl)thiophen-2-yl)-2,5-dihydropyrrolo[3,4-*c*]pyrrole-1,4-dione (NTT), and 2,5-bis(2-ethylhexyl)-3,6-bis(5-(naphthalen-1-yl)thiophen-2-yl)-2,5-dihydropyrrolo[3,4-*c*]pyrrole-1,4-dione (Flu-NTT) were prepared according to literature procedures.

olo[3,4-*c*]pyrrole-1,4-dione (1N-TDPP), 2,5-bis(2-ethylhexyl)-3,6-bis(5-(naphthalen-2-yl)thiophen-2-yl)-2,5-dihydropyrrolo[3,4-*c*]pyrrole-1,4-dione (2N-TDPP), 2,5-bis(2-ethylhexyl)-3,6-bis(5-(pyren-4-yl)thiophen-2-yl)-2,5-dihydropyrrolo[3,4-*c*]pyrrole-1,4-dione (Py-TDPP), 3,6-bis(5-(4-(bis(4-methoxyphenyl)amino)phenyl)thiophen-2-yl)-2,5-bis(2-ethylhexyl)-2,5-dihydropyrrolo[3,4-*c*]pyrrole-1,4-dione (TPAOMe-TDPP) and 3,6-di([2,2'-bithiophen]-5-yl)-2,5-bis(2-ethylhexyl)-2,5-dihydropyrrolo[3,4-*c*]pyrrole-1,4-dione (Th-TDPP), 4,4'-(5,5'-(benzo[*c*][1,2,5]thiadiazole-4,7-diyl)bis(3-hexylthiophene-5,2-diyl))bis(*N,N*-bis(4-methoxy-phenyl)aniline) (TPAOMe-BTT) were synthesized according to previously published procedures.<sup>19</sup> <sup>1</sup>H and <sup>13</sup>C NMR spectra were collected on a Bruker Avance III 400 MHz spectrometer and chemical shifts,  $\delta$  (ppm), were referenced to the residual solvent impurity peak of the given solvent. Solutions tested in <sup>13</sup>C NMR are saturated. Data reported as: s = singlet, d = doublet, t = triplet, m = multiplet, br = broad; coupling constant(s), *J* are given in Hz. Flash chromatography was performed on a Teledyne Isco CombiFlash Purification System using RediSep Rf prepacked columns. The melting point of each material was estimated by differential scanning calorimetry DSC (Netzsch DSC 200F3) at a heating rate of 10 °C·min<sup>-1</sup> under nitrogen. Element composition (C, H, S, N) was collected on a Elementar Vario EL cube. The composition of O element was calculated by subtracting the composition of C, H, S, N elements.

HPLC analysis was conducted using Cosmosil 5C<sub>18</sub>-MS-II column with the chromatographic conditions as follow. (1) For NTT, 2N-NTT, Flu-NTT, NTC, 2N-NTC, Flu-NTC, Ph-TDPP, 2N-TDPP, flow rate = 0.3 ml min<sup>-1</sup>, eluent = CH<sub>2</sub>Cl<sub>2</sub>/isopropanol =1:1, column temperature = 25 °C. (2) For 1N-TDPP, Py-TDPP, Flu-TDPP, Flu-TDPP-C8, TPAOMe-TDPP, TPAOMe-TDPP-C4, TPAOMe-TDPP, flow rate = 0.3 ml min<sup>-1</sup>, eluent = CH<sub>2</sub>Cl<sub>2</sub>/isopropanol =4:1, column temperature = 25 °C. (3) For An-TDPP, Th-TDPP, TPAOMe-BTT, flow rate = 0.3 ml min<sup>-1</sup>, eluent = CH<sub>2</sub>Cl<sub>2</sub>/isopropanol =19:1, column temperature = 25 °C.

### 2,5-bis(2-ethylhexyl)-3,6-bis(5-phenylthiophen-2-yl)-2,5-dihydropyrrolo[3,4-*c*]pyrrole-1,4-dione (Ph-TDPP)

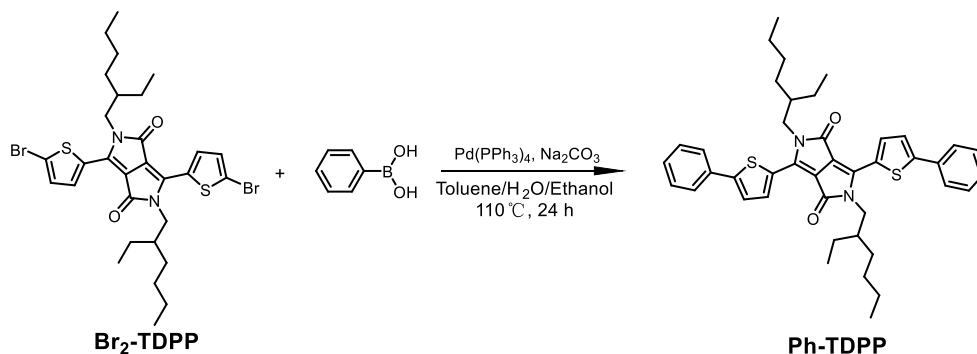

Ph-TDPP was synthesized according to previously published procedures.<sup>19</sup> Melting point (Mp): 213 °C; <sup>1</sup>H NMR (400 MHz, chloroform-*d*)  $\delta$  8.96 (s, 2H), 7.68 (d, *J* = 6.2 Hz, 4H), 7.50 – 7.29 (m, 8H), 4.14 – 4.02 (m, 4H), 1.94 (d, *J* = 5.9 Hz, 2H), 1.45 – 1.23 (m, 16H), 0.92 (t, *J* = 7.4 Hz, 6H), 0.87 (t, *J* = 7.0 Hz, 6H). UV/Vis:  $\lambda_{\text{max}}$  578 nm; MOLDI-TOF-MS (*m/z*): Calcd. for C<sub>42</sub>H<sub>48</sub>N<sub>2</sub>O<sub>2</sub>S<sub>2</sub>: *m/z*: 676.3157. Found: 676.3426; analysis (calcd., found for C<sub>42</sub>H<sub>48</sub>N<sub>2</sub>O<sub>2</sub>S<sub>2</sub>): C(74.52, 74.82), H(7.15, 7.12), S(9.47, 9.31), N(4.14, 4.20), O(4.73, 4.55).

### 2,5-bis(2-ethylhexyl)-3,6-bis(5-(naphthalen-1-yl)thiophen-2-yl)-2,5-dihydropyrrolo[3,4-*c*]pyrrole-1,4-dione (1N-TDPP)

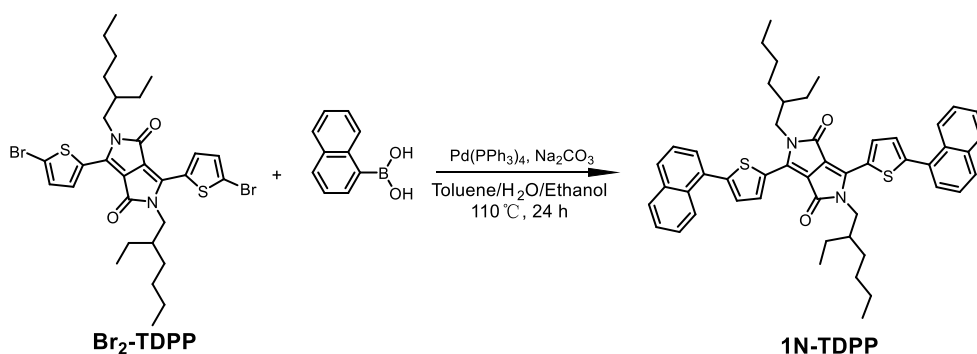

1N-TDPP was synthesized according to previously published procedures.<sup>19</sup> Melting point (Mp): 183 °C; <sup>1</sup>H NMR (400 MHz, chloroform-*d*) δ 9.07 (s, 2H), 8.31 – 8.25 (m, 2H), 8.00 – 7.88 (m, 4H), 7.69 – 7.43 (m, 10H), 4.11 (p, *J* = 7.4 Hz, 4H), 2.00 (d, *J* = 5.4 Hz, 2H), 1.49 – 1.24 (m, 16H), 0.93 (t, *J* = 7.4 Hz, 6H), 0.85 (t, *J* = 7.0 Hz, 6H). <sup>13</sup>C NMR (101 MHz, CDCl<sub>3</sub>) δ 161.88, 147.77, 140.17, 136.10, 133.95, 131.41, 131.08, 129.86, 129.45, 128.93, 128.58, 128.37, 126.98, 126.38, 125.38, 125.29, 108.13, 46.08, 39.32, 30.33, 28.51, 23.65, 23.14, 14.08, 10.59. UV/Vis: λ<sub>max</sub> 600 nm; MOLDI-TOF-MS (*m/z*): Calcd. for C<sub>50</sub>H<sub>52</sub>N<sub>2</sub>O<sub>2</sub>S<sub>2</sub>: *m/z*: 776.3470. Found: 776.3426; analysis (calcd., found for C<sub>50</sub>H<sub>52</sub>N<sub>2</sub>O<sub>2</sub>S<sub>2</sub>): C(77.28, 77.21), H(6.75, 6.31), S(8.25, 8.11), N(3.60, 3.55), O(4.12, 4.82).

**2,5-bis(2-ethylhexyl)-3,6-bis(5-(naphthalen-2-yl)thiophen-2-yl)-2,5-dihydropyrrolo[3,4-c]pyrrole-1,4-dione (2N-TDPP)**

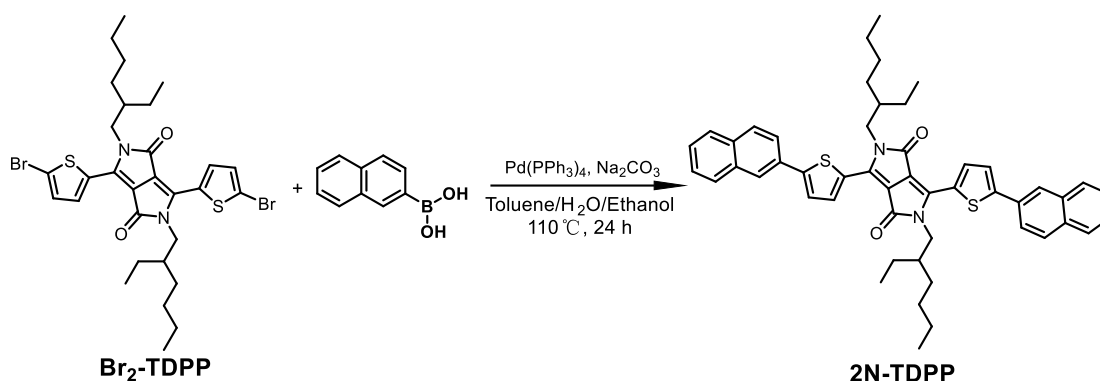

2N-TDPP was synthesized according to previously published procedures.<sup>19</sup> Melting point (Mp): 227 °C; <sup>1</sup>H NMR (400 MHz, Chloroform-*d*) δ 9.00 (s, 2H), 8.13 (s, 2H), 7.91 – 7.79 (m, 8H), 7.60 (dd, *J* = 4.1, 2.7 Hz, 2H), 7.53 (d, *J* = 6.6 Hz, 2H), 4.13 (t, *J* = 6.7 Hz, 4H), 1.98 (d, *J* = 7.0 Hz, 2H), 1.45 – 1.30 (m, 16H), 0.95 (d, *J* = 7.3 Hz, 6H), 0.91 (d, *J* = 6.8 Hz, 6H). UV/Vis: λ<sub>max</sub> 650 nm; MOLDI-TOF-MS (*m/z*): Calcd for C<sub>50</sub>H<sub>52</sub>N<sub>2</sub>O<sub>2</sub>S<sub>2</sub>: *m/z*: 776.3470. Found: 776.3467; analysis (calcd., found for C<sub>50</sub>H<sub>52</sub>N<sub>2</sub>O<sub>2</sub>S<sub>2</sub>): C(77.28, 77.32), H(6.75, 6.33), S(8.25, 8.10), N(3.60, 3.50), O(4.12, 4.75).

**3,6-bis(5-(anthracen-9-yl)thiophen-2-yl)-2,5-bis(2-ethylhexyl)-2,5-dihydropyrrolo[3,4-c]pyrrole-1,4-dione (An-TDPP)**

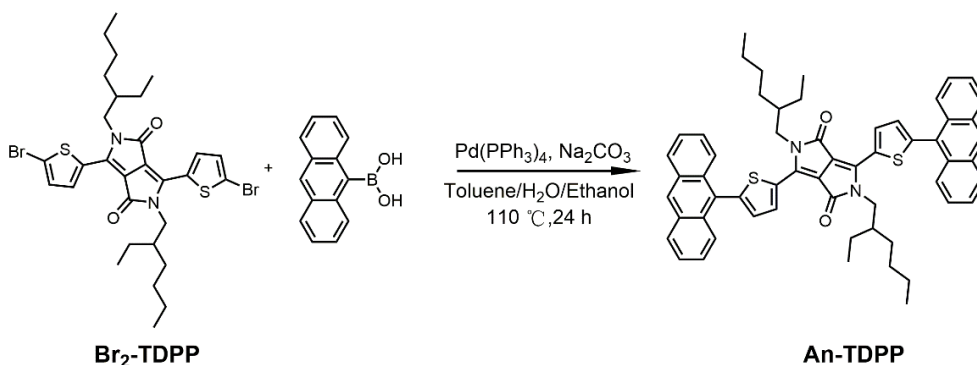

3,6-bis(5-bromothiophen-2-yl)-2,5-bis(2-ethylhexyl)-2,5-dihydropyrrolo[3,4-*c*]pyrrole-1,4-dione (**Br<sub>2</sub>-TDPP**) (200 mg, 0.29 mmol) was dissolved in a mixture of toluene (20 ml) and ethanol (8 ml). Anthracen-9-ylboronic acid (193.2 mg, 0.87 mmol), Na<sub>2</sub>CO<sub>3</sub> (3 mL, 2M), Pd(PPh<sub>3</sub>)<sub>4</sub> (16.8 mg, 0.0145 mmol) were added to the mixture. The reaction mixture was cooled to room temperature, extracted with 60 ml dichloromethane, and washed with saturated brine water (3×100 ml) three times, dried over anhydrous MgSO<sub>4</sub>, and volatiles were removed *in vacuo*. The crude product was purified by column chromatography on silica gel using dichloromethane and petroleum ether and recrystallization resulting in a deep-brown solid **An-TDPP** (171 mg, 67%). Melting point (Mp): 209 °C; <sup>1</sup>H NMR (400 MHz, chloroform-*d*) δ 9.23 (s, 2H), 8.59 (s, 2H), 8.07 (d, *J* = 8.2 Hz, 4H), 7.92 (d, *J* = 8.6 Hz, 4H), 7.59 – 7.35 (m, 10H), 4.18 – 4.04 (m, 4H), 2.03 (d, *J* = 5.8 Hz, 2H), 1.46 – 1.21 (m, 16H), 0.97 – 0.86 (m, 6H), 0.85 – 0.72 (m, 6H). <sup>13</sup>C NMR (101 MHz, CDCl<sub>3</sub>) δ 161.93, 145.14, 140.28, 136.14, 131.58, 131.17, 128.84, 128.49, 126.74, 126.45, 126.14, 125.46, 108.18, 46.11, 39.31, 30.22, 28.41, 23.50, 23.06, 14.00, 10.50. UV/Vis: λ<sub>max</sub> 582 nm; MOLDI-TOF-MS (*m/z*): calcd. for C<sub>58</sub>H<sub>56</sub>N<sub>2</sub>O<sub>2</sub>S<sub>2</sub>, 899.3783; found: 899.3773; analysis (calcd., found for C<sub>58</sub>H<sub>56</sub>N<sub>2</sub>O<sub>2</sub>S<sub>2</sub>): C(79.41, 79.11), H(6.43, 6.41), S(7.31, 7.37), N(3.19, 3.15), O(3.65, 3.97).

### 2,5-bis(2-ethylhexyl)-3,6-bis(5-(pyren-1-yl)thiophen-2-yl)-2,5-dihydropyrrolo[3,4-*c*]pyrrole-1,4-dione (**Py-TDPP**)

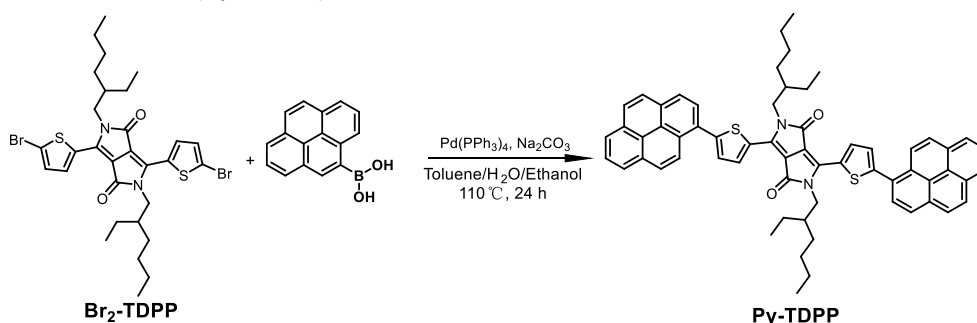

**Py-TDPP** was synthesized according to previously published procedures.<sup>19</sup> Melting point (Mp): 217 °C; <sup>1</sup>H NMR (500 MHz, Chloroform-*d*) δ 9.14 (s, 2H), 8.57 (d, *J* = 9.2 Hz, 2H), 8.35 – 7.79 (m, 16H), 7.60 (d, *J* = 3.6 Hz, 2H), 4.15 (q, *J* = 15.2, 11.7 Hz, 4H), 2.07 (s, 2H), 1.53 – 1.23 (m, 16H), 0.97 (t, *J* = 7.3 Hz, 6H), 0.88 (t, *J* = 7.0 Hz, 6H). UV/Vis: λ<sub>max</sub> 585 nm; MOLDI-TOF-MS (*m/z*): Calcd. for C<sub>62</sub>H<sub>56</sub>N<sub>2</sub>O<sub>2</sub>S<sub>2</sub>: *m/z*: 924.3873. Found: 924.3883; analysis (calcd., found for C<sub>62</sub>H<sub>56</sub>N<sub>2</sub>O<sub>2</sub>S<sub>2</sub>): C(80.48, 80.15), H(6.10, 6.12), S(6.93, 7.06), N(3.03, 2.95), O(3.46, 3.73).

**3,6-di([2,2'-bithiophen]-5-yl)-2,5-bis(2-ethylhexyl)-2,5-dihydropyrrolo[3,4-*c*]pyrrole-1,4-dione (Th-TDPP)**

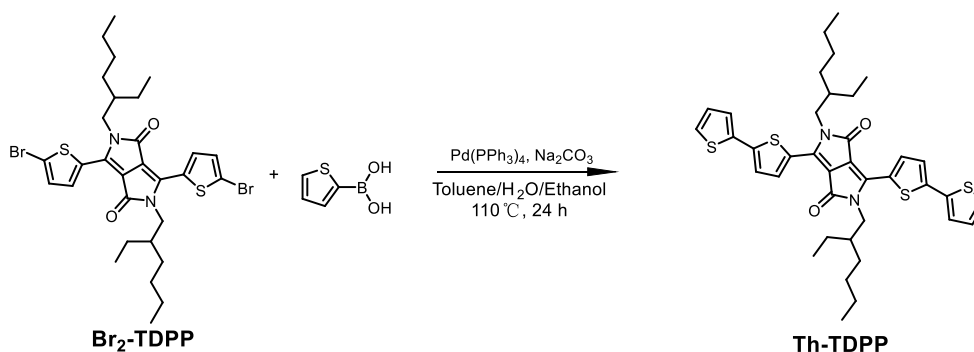

Th-TDPP was synthesized according to previously published procedures.<sup>19</sup> Melting point (Mp): 186 °C; <sup>1</sup>H NMR (400 MHz, Chloroform-*d*) δ 8.92 (s, 2H), 7.32 (d, *J* = 4.1 Hz, 6H), 7.11 – 7.05 (m, 2H), 4.05 (p, *J* = 7.2 Hz, 4H), 1.92 (d, *J* = 5.8 Hz, 2H), 1.44 – 1.21 (m, 16H), 0.89 (dt, *J* = 16.8, 7.3 Hz, 12H). UV/Vis: λ<sub>max</sub> 580 nm; analysis (calcd., found for C<sub>38</sub>H<sub>44</sub>N<sub>2</sub>O<sub>2</sub>S<sub>4</sub>): C(66.24, 65.70), H(6.44, 6.22), S(18.61, 18.99), N(4.07, 3.95), O(4.64, 5.14).

**3,6-bis(5-(9,9-dimethyl-9H-fluoren-2-yl)thiophen-2-yl)-2,5-bis(2-ethylhexyl)-2,5-dihydropyrrolo[3,4-*c*]pyrrole-1,4-dione (Flu-TDPP)**

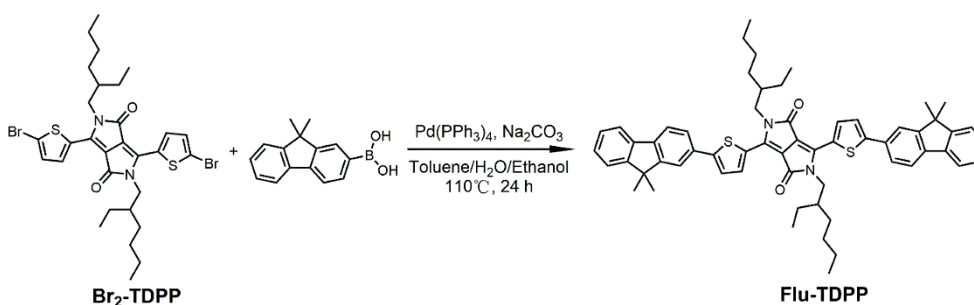

Flu-TDPP was synthesized from Br<sub>2</sub>-TDPP (200 mg, 0.29 mmol) and (9,9-dimethyl-9H-fluoren-2-yl)boronic acid (174 mg, 0.73 mmol) using an analogous procedure similar to that for An-TDPP resulting in a brown solid (210 mg, 79 %). Melting point (Mp): 216 °C; <sup>1</sup>H NMR (400 MHz, chloroform-*d*) δ 9.00 (s, 2H), 7.85 – 7.58 (m, 8H), 7.52 (d, *J* = 4.1 Hz, 2H), 7.68–7.46 (m, 2H), 7.39 – 7.35 (m, 4H), 4.18 – 4.07 (t, *J* = 7.9 Hz, 4H), 1.97 (m, 2H), 1.45 – 1.25 (m, 16H), 0.96 – 0.88 (m, 12H). <sup>13</sup>C NMR (101 MHz, CDCl<sub>3</sub>) δ 153.98, 127.81, 127.18, 122.69, 120.31, 77.35, 47.04, 46.01, 39.33, 30.50, 28.65, 27.16, 23.77, 23.18, 14.14, 10.67. UV/Vis: λ<sub>max</sub> 616 nm; MOLDI-TOF-MS (*m/z*): calcd. for C<sub>60</sub>H<sub>64</sub>N<sub>2</sub>O<sub>2</sub>S<sub>2</sub>, 908.4409; found: 908.4425; analysis (calcd., found for C<sub>60</sub>H<sub>64</sub>N<sub>2</sub>O<sub>2</sub>S<sub>2</sub>): C(79.25, 79.31), H(7.09, 7.13), S(7.05, 7.07), N(3.08, 3.10), O(3.52, 3.40).

**3,6-bis(5-(9,9-dimethyl-9H-fluoren-2-yl)thiophen-2-yl)-2,5-dioctyl-2,5-dihydropyrrolo[3,4-*c*]pyrrole-1,4-dione (DPPT-Flu-C8)**

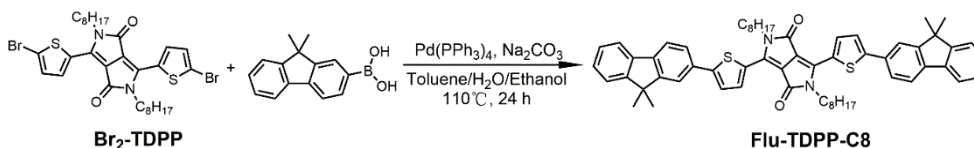



Flu-TDPP-C8 was synthesized from Br<sub>2</sub>-TDPP (200 mg, 0.29 mmol) and (9,9-dimethyl-9H-fluoren-2-yl)boronic acid (174 mg, 0.73 mmol) in a procedure similar to that for Flu-TDPP resulting in a brown solid (200 mg, 75%). <sup>1</sup>H NMR (400 MHz, chloroform-*d*) δ 9.00 (s, 2H), 7.85 – 7.58 (m, 8H), 7.54 (d, *J* = 4.1 Hz, 2H), 7.49 – 7.44 (m, 2H), 7.40 – 7.32 (m, 4H), 4.17 (t, *J* = 7.9 Hz, 4H), 1.83 (p, *J* = 7.6 Hz, 4H), 1.54 – 1.23 (m, 20H), 0.91 – 0.84 (m, 6H). <sup>13</sup>C NMR (101 MHz, CDCl<sub>3</sub>) δ 154.59, 153.98, 140.21, 139.36, 138.36, 136.79, 132.09, 128.56, 127.83, 127.20, 125.49, 124.56, 122.70, 120.63, 120.30, 47.05, 42.34, 31.84, 30.06, 29.72, 29.29, 27.17, 22.67, 14.12. MOLDI-TOF-MS (*m/z*): calcd. for C<sub>60</sub>H<sub>64</sub>N<sub>2</sub>O<sub>2</sub>S<sub>2</sub>, 908.4409; found: 908.4469.

**3,6-bis(5-(4-(bis(4-methoxyphenyl)amino)phenyl)thiophen-2-yl)-2,5-bis(2-ethylhexyl)-2,5-dihydropyrrolo[3,4-*c*]pyrrole-1,4-dione (TPAOMe-TDPP)**

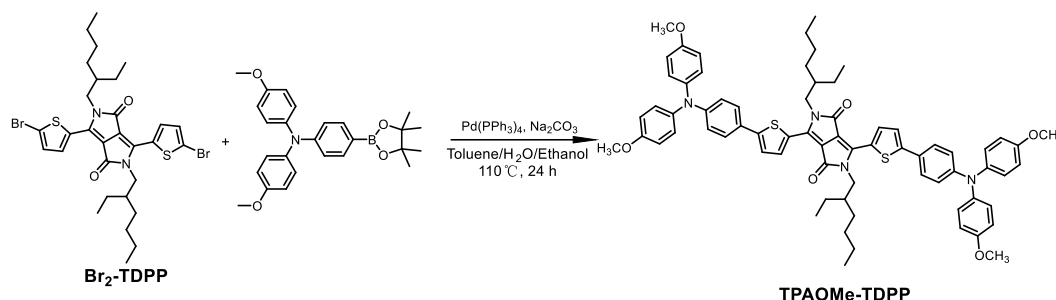

TPAOMe-TDPP was synthesized according to previously published procedures.<sup>19</sup> Melting point (Mp): 207 °C; <sup>1</sup>H NMR (400 MHz, Chloroform-*d*) δ 8.97 (s, 2H), 7.44 (s, 6H), 7.08 (s, 8H), 6.86 (d, *J* = 8.5 Hz, 12H), 4.02 (d, *J* = 25.2 Hz, 4H), 3.81 (s, 12H), 1.95 (s, 2H), 1.44 – 1.18 (m, 16H), 0.94 – 0.79 (m, 12H). UV/Vis: λ<sub>max</sub> 610 nm; MOLDI-TOF-MS (*m/z*): Calcd for C<sub>70</sub>H<sub>74</sub>N<sub>4</sub>O<sub>6</sub>S<sub>2</sub>; *m/z*: 1130.5050. Found: 1130.5164; analysis (calcd., found for C<sub>70</sub>H<sub>74</sub>N<sub>4</sub>O<sub>6</sub>S<sub>2</sub>): C(74.31, 73.95), H(6.59, 6.41), S(5.67, 5.71), N(4.95, 4.82), O(8.48, 9.11).

**3,6-bis(5-(4-(bis(4-methoxyphenyl)amino)phenyl)thiophen-2-yl)-2,5-dibutyl-2,5-dihydropyrrolo[3,4-*c*]pyrrole-1,4-dione (TPAOMe-TDPP-C4)**

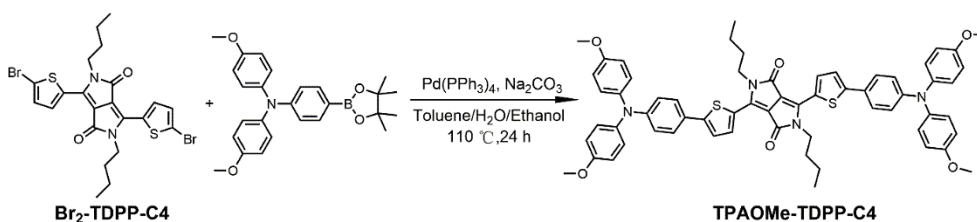

TPAOMe-TDPP-C4 was prepared from 3,6-bis(5-bromothiophen-2-yl)-2,5-dibutyl-2,5-dihydropyrrolo[3,4-*c*]pyrrole-1,4-dione (200 mg, 0.35 mmol) and 4-methoxy-*N*-(4-(4,4,5,5-tetramethyl-1,3,2-dioxaborolan-2-yl)phenyl)aniline (378.1 mg, 0.88 mmol) using a procedure similar to that for TPAOMe-TDPP resulting in a dark-brown solid (278.3 mg, 75%). <sup>1</sup>H NMR (400 MHz, Chloroform-*d*) δ 9.01 (s, 2H), 7.39 (d, *J* = 56.7 Hz, 6H), 7.09 (d, *J* = 8.4 Hz, 8H), 6.95 – 6.81 (m, 12H), 4.10 (d, *J* = 8.0 Hz, 4H), 3.81 (s, 12H), 1.83 – 1.71 (m, 4H), 1.47 (h, *J* = 7.4 Hz, 4H), 0.98 (t, *J* = 7.4 Hz, 6H). <sup>13</sup>C NMR (101 MHz, CDCl<sub>3</sub>) δ 156.40, 127.26, 114.96, 114.80, 55.52, 42.05, 20.26, 13.83. MOLDI-TOF-MS (*m/z*): calcd. for C<sub>62</sub>H<sub>58</sub>N<sub>4</sub>O<sub>6</sub>S<sub>2</sub>, 1018.3798; found: 1018.3806.

**3,6-bis(5'-(4-(bis(4-methoxyphenyl)amino)phenyl)-[2,2'-bithiophen]-5-yl)-2,5-bis(2-ethylhexyl)-2,5-dihydropyrrolo[3,4-c]pyrrole-1,4-dione (TPAOMe-TTDPP)**

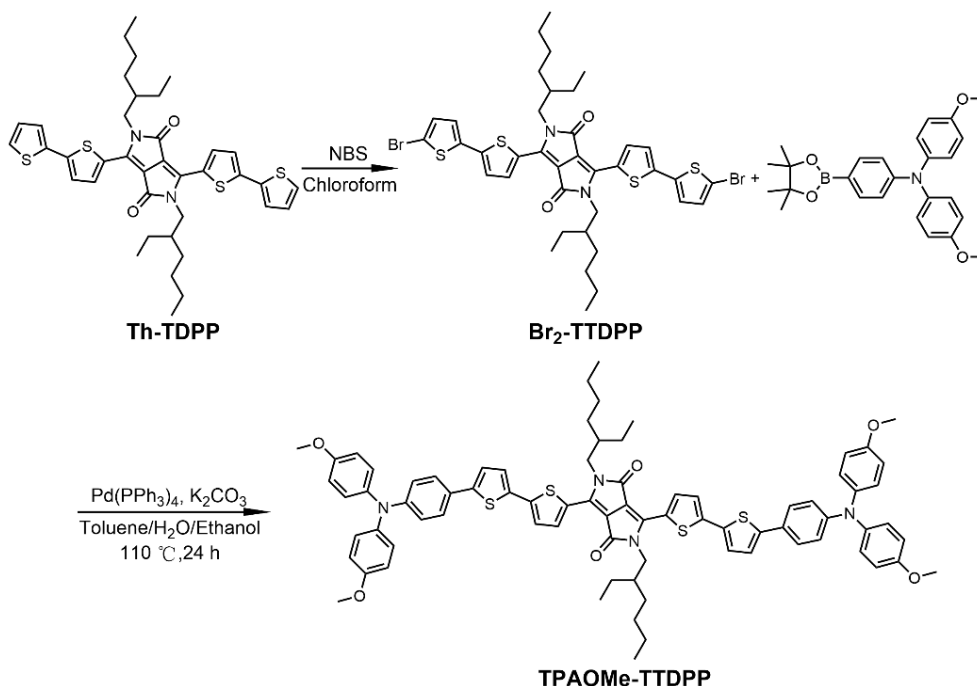

**3,6-bis(5'-bromo-[2,2'-bithiophen]-5-yl)-2,5-bis(2-ethylhexyl)pyrrolo[3,4-c]pyrrole-1,4(2*H*,5*H*)-dione (Br<sub>2</sub>-TTDPP):** Th-TDPP (150 mg, 0.218 mmol) was dissolved in 30 mL of chloroform in a 50 mL flask under nitrogen. The reaction mixture was stirred and allowed to cool to 0 °C, where it was stirred for an additional 10 min. *N*-bromosuccinimide (NBS) (81 mg, 0.458 mmol) was added over a period of 50 min. After stirring for another 10 min, the reaction was warmed to room temperature and stirred overnight. The reaction mixture was poured into a separatory funnel and washed with saturated brine water (3×100 ml) three times, dried over anhydrous MgSO<sub>4</sub>, and volatiles were removed *in vacuo*. The residue was purified by column chromatography on silica gel resulting in Br<sub>2</sub>-TTDPP (138 mg, yield 75%). <sup>1</sup>H NMR (400 MHz, Chloroform-*d*) δ 8.88 (t, *J* = 4.8 Hz, 2H), 7.24 (d, *J* = 4.1 Hz, 2H), 7.05 (dd, *J* = 10.9, 3.9 Hz, 4H), 4.10 – 3.93 (m, 4H), 1.90 (s, 2H), 1.47 – 1.16 (m, 16H), 0.99 – 0.74 (m, 12H).

**TPAOMe-TTDPP:** Br<sub>2</sub>-TTDPP (130 mg, 0.154 mmol) and 4-methoxy-*N*-(4-(4,4,5,5-tetramethyl-1,3,2-dioxaborolan-2-yl)phenyl)aniline (198.6 mg, 0.61 mmol), Pd(PPh<sub>3</sub>)<sub>4</sub> (7.4 mg, 0.0064 mmol) were dissolved in a mixture of toluene (20 mL), ethanol (5 mL) and 3 mL K<sub>2</sub>CO<sub>3</sub> (2M) in a 50 mL two-necked round bottomed flask under an atmosphere of nitrogen. The mixture was heated to 110 °C and stirred at this temperature for 24 h under nitrogen. The reaction mixture was cooled to room temperature, extracted with 150 ml dichloromethane and washed with saturated brine water three times (3×200 ml), dried over anhydrous MgSO<sub>4</sub>, and volatiles were removed *in vacuo*. The residue was purified by silica gel column chromatography and recrystallization resulting in a dark brown solid TPAOMe-TTDPP (115 mg, yield 58%). Melting point (Mp): 240 °C; <sup>1</sup>H NMR (400 MHz, Chloroform-*d*) δ 8.87 (s, 2H), 7.37 (s, 6H), 6.93 (t, *J* = 36.3 Hz, 24H), 4.03 (s, 4H), 3.82 (s, 12H), 1.94 (s, 2H), 1.44 – 1.23 (m, 17H), 0.96 – 0.81 (m, 12H). <sup>13</sup>C NMR (126 MHz, CDCl<sub>3</sub>) δ 156.20, 148.79, 140.29, 126.89, 126.35, 120.07, 114.76, 55.50, 45.99, 39.27, 30.38, 28.57, 23.70, 23.14, 14.12, 10.60.

UV/Vis  $\lambda_{\max}$  664 nm; MOLDI-TOF-MS (m/z): calcd. for  $C_{78}H_{78}N_4O_6S_4$ , 1294.4804; found: 1294.4776; analysis (calcd., found for  $C_{78}H_{78}N_4O_6S_4$ ): C(72.30, 72.45), H(6.07, 6.17), S(9.90, 9.65), N(4.32, 4.26), O(7.41, 7.48).

**5,10-bis(4-hexyl-5-(naphthalen-2-yl)thiophen-2-yl)naphtho[1,2-c:5,6-c']bis([1,2,5]thiadiazole) (2N-NTT)**

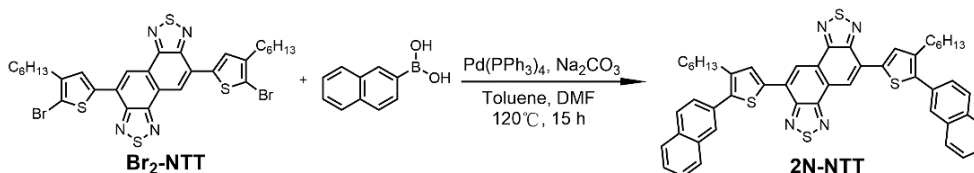

Under a nitrogen atmosphere,  $Br_2$ -NTT (300 mg, 0.41 mmol) was dissolved in a mixture of toluene and *N,N*-dimethylformamide. Naphthalen-2-ylboronic acid (351 mg, 2.04 mmol),  $Na_2CO_3$  (1.6 ml, 2M),  $Pd(PPh_3)_4$  (23.1 mg, 0.02 mmol) were added to the mixture. The resulting solution was heated to 120 °C for 15 hours. The reaction mixture was cooled to room temperature, extracted with 100 ml dichloromethane, and washed with saturated brine water three times ( $3 \times 150$  ml), dried over anhydrous  $MgSO_4$ , and volatiles were removed *in vacuo*. The residue was purified by column chromatography on silica gel using dichloromethane and petroleum ether and recrystallization resulting in a red solid 2N-NTT (200 mg, 59%). Melting point (Mp): 186 °C;  $^1H$  NMR (400 MHz, Chloroform-*d*)  $\delta$  8.92 (s, 2H), 8.16 (s, 2H), 8.00 (d,  $J = 1.7$  Hz, 2H), 7.93 – 7.84 (m, 6H), 7.67 (dd,  $J = 8.4, 1.8$  Hz, 2H), 7.56 – 7.49 (m, 4H), 2.89 – 2.74 (m, 4H), 1.82 – 1.71 (m, 4H), 1.46 – 1.25 (m, 12H), 0.92 – 0.81 (m, 6H).  $^{13}C$  NMR (126 MHz,  $CDCl_3$ )  $\delta$  153.44, 152.37, 140.49, 140.28, 137.13, 133.39, 132.63, 131.87, 131.14, 128.17, 128.05, 127.72, 127.26, 126.48, 126.28, 124.65, 121.82, 31.67, 31.06, 29.35, 29.14, 22.68, 14.10. UV/Vis  $\lambda_{\max}$  342 nm; MOLDI-TOF-MS (m/z): calcd. for  $C_{50}H_{44}N_4S_4$ , 828.2449; found: 828.2546; analysis (calcd., found for  $C_{50}H_{44}N_4S_4$ ): C(72.43, 72.67), H(5.35, 5.29), S(15.47, 15.28), N(6.76, 6.67).

**5,10-bis(5-(9,9-dimethyl-9H-fluoren-2-yl)-4-hexylthiophen-2-yl)naphtho[1,2-c:5,6-c']bis([1,2,5]thiadiazole) (Flu-NTT)**

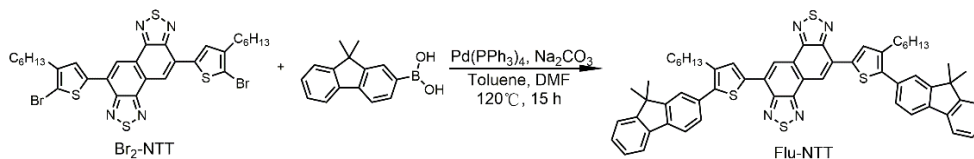

Flu-NTT was prepared from  $Br_2$ -NTT (200 mg, 0.27 mmol) and (9,9-dimethyl-9H-fluoren-2-yl)boronic acid (324 mg, 1.36 mmol) in a procedure similar to that for 2N-NTT resulting in a purple solid (184 mg, 71%). Melting point (Mp): 217 °C;  $^1H$  NMR (400 MHz, Chloroform-*d*)  $\delta$  9.00 (s, 2H), 8.20 (s, 2H), 7.81 – 7.75 (m, 4H), 7.64 (d,  $J = 1.6$  Hz, 2H), 7.55 (dd,  $J = 7.8, 1.7$  Hz, 2H), 7.50 – 7.46 (m, 2H), 7.37 (ddd,  $J = 7.3, 5.1, 1.5$  Hz, 4H), 2.83 (dd,  $J = 9.2, 6.7$  Hz, 4H), 1.79 (d,  $J = 7.6$  Hz, 4H), 1.33 (tt,  $J = 5.9, 2.6$  Hz, 8H), 0.92 – 0.85 (m, 6H).  $^{13}C$  NMR (126 MHz,  $CDCl_3$ )  $\delta$  154.05, 153.91, 153.59, 152.52, 141.21, 139.98, 138.85, 138.77, 136.72, 133.30, 131.32, 128.18, 127.49, 127.12, 126.46, 124.76, 123.49, 122.69, 121.96, 120.18, 120.09, 47.01, 31.71, 31.16, 29.39, 29.22, 27.22, 22.70, 14.12. UV/Vis  $\lambda_{\max}$  345 nm; MOLDI-

TOF-MS (m/z): calcd. for C<sub>60</sub>H<sub>56</sub>N<sub>4</sub>S<sub>4</sub>, 960.3388; found: 960.3397; analysis (calcd., found for C<sub>60</sub>H<sub>56</sub>N<sub>4</sub>S<sub>4</sub>): C(74.96, 75.01), H(5.87, 5.92), S(13.34, 13.12), N(5.83, 5.81).

**4,4'-(naphtho[1,2-c:5,6-c']bis([1,2,5]thiadiazole)-5,10-diylbis(3-hexylthiophene-5,2-diyl))bis(*N,N*-bis(4-methoxyphenyl)aniline) (TPAOMe-NTT)**

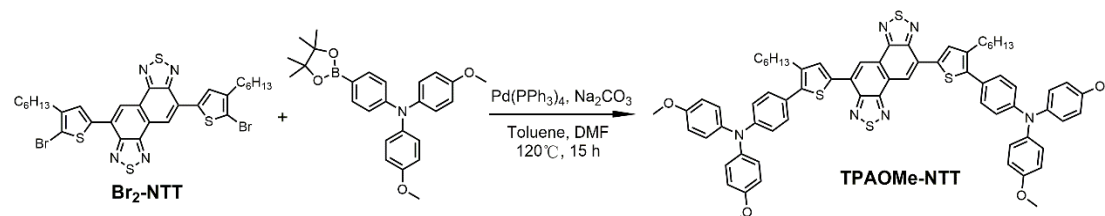

TPAOMe-NTT was prepared from Br<sub>2</sub>-NTT (300 mg, 0.41 mmol) and 4-methoxy-*N*-(4-methoxyphenyl)-*N*-(4-(4,4,5,5-tetramethyl-1,3,2-dioxaborolan-2-yl)phenyl)aniline (881mg, 2.04 mmol) in a procedure similar to that for 2N-NTT resulting in a dark-blue solid (150 mg, 31%). Melting point (M<sub>p</sub>): 216 °C; <sup>1</sup>H NMR (400 MHz, Chloroform-*d*) δ 8.82 (s, 2H), 8.08 (s, 2H), 7.36 – 7.32 (m, 4H), 7.16 – 7.08 (m, 8H), 6.98 (d, *J* = 8.1 Hz, 4H), 6.91 – 6.84 (m, 8H), 3.82 (s, 12H), 2.74 (s, 4H), 1.80 – 1.69 (m, 4H), 1.47 – 1.19 (m, 12H), 0.95 – 0.84 (m, 6H). UV/Vis λ<sub>max</sub> 360 nm; analysis (calcd., found for C<sub>70</sub>H<sub>66</sub>N<sub>6</sub>O<sub>4</sub>S<sub>4</sub>): C(71.04, 71.35), H(5.62, 5.55), S(10.83, 10.76), N(7.10, 7.01), O(5.41, 5.34).

**5,10-bis(4,4-didodecyl-4*H*-cyclopenta[2,1-*b*:3,4-*b'*]dithiophen-2-yl)naphtho[1,2-*c*:5,6-*c'*]bis([1,2,5]thiadiazole) (NTC)**

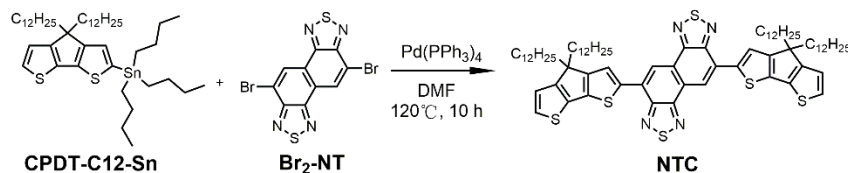

Under a nitrogen atmosphere, Br<sub>2</sub>-NT (250 mg, 0.62 mmol), CPDT-C12-Sn (1.5 g, 1.86 mmol) and Pd(PPh<sub>3</sub>)<sub>4</sub> (190 mg, 0.16 mmol) were dissolved in 60 ml DMF. Then the solution was heated to 120 °C and stirred for 10 hours. The reaction mixture was cooled to room temperature, extracted with 100 ml dichloromethane and washed with saturated brine water three times (3×150 ml), dried over anhydrous MgSO<sub>4</sub>, and volatiles were removed *in vacuo*. The residue was purified by column chromatography on silica gel using dichloromethane and petroleum ether and recrystallization resulting in a dark-blue solid NTC (310mg, 39%). Melting point (M<sub>p</sub>): 128 °C; <sup>1</sup>H NMR (400 MHz, Chloroform-*d*) δ 8.97 (s, 2H), 8.19 (s, 2H), 7.28 (d, *J* = 4.8 Hz, 2H), 7.01 (d, *J* = 4.8 Hz, 2H), 1.98 (ddd, *J* = 9.4, 5.7, 2.5 Hz, 8H), 1.17 (s, 80H), 0.83 (t, *J* = 7.0 Hz, 12H). <sup>13</sup>C NMR (126 MHz, CDCl<sub>3</sub>) δ 159.18, 158.98, 153.54, 152.35, 139.90, 138.98, 136.62, 132.15, 128.56, 126.98, 126.20, 124.37, 122.57, 121.77, 120.73, 53.92, 37.96, 31.89, 30.08, 29.64, 29.63, 29.62, 29.42, 29.32, 24.64, 22.66, 14.10. UV/Vis λ<sub>max</sub> 603 nm; MOLDI-TOF-MS (m/z): calcd. for C<sub>76</sub>H<sub>108</sub>N<sub>4</sub>S<sub>6</sub>, 1268.6898; found: 1268.6955; analysis (calcd., found for C<sub>76</sub>H<sub>108</sub>N<sub>4</sub>S<sub>6</sub>): C(71.87, 72.15), H(8.57, 8.41), S(15.15, 15.01), N(4.41, 4.67).

**5,10-bis(4,4-didodecyl-6-(naphthalen-2-yl)-4*H*-cyclopenta[2,1-*b*:3,4-*b'*]dithiophen-2-yl)naphtho[1,2-*c*:5,6-*c'*]bis([1,2,5]thiadiazole) (2N-NTC)**

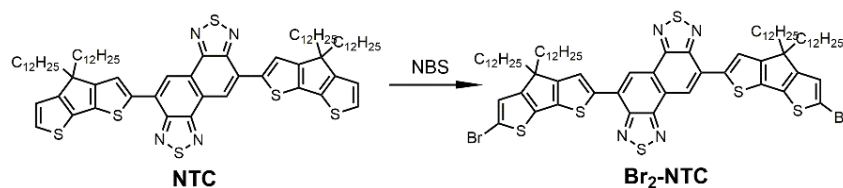

**5,10-bis(6-bromo-4,4-didodecyl-4*H*-cyclopenta[2,1-*b*:3,4-*b'*]dithiophen-2-yl)naphtho[1,2-*c*:5,6-*c'*]bis([1,2,5]thiadiazole) (Br<sub>2</sub>-NTC):** NTC (300mg, 0.24 mmol) was dissolved in 50 ml chloroform and cooled to -30 °C. NBS (107 mg, 0.60 mmol) was added to the solution in several times in dark. The solution was stirred in dark for 2 hours. After finishing the reaction, water was added to the solution and the aqueous layer extracted with dichloromethane. The organic layer was washed with brine, dried over anhydrous MgSO<sub>4</sub> and then concentrated under reduced pressure. The reaction mixture was warmed to room temperature and washed with saturated brine water three times (3×150 ml), dried over anhydrous MgSO<sub>4</sub>, and volatiles were removed *in vacuo*. The residue was purified by column chromatography on silica gel using dichloromethane and petroleum ether resulting in a dark-blue solid Br<sub>2</sub>-NTC (330 mg, 98%). <sup>1</sup>H NMR (400 MHz, Chloroform-*d*) δ 8.95 (s, 2H), 8.15 (s, 2H), 7.02 (s, 2H), 1.95 (td, *J* = 9.2, 6.1 Hz, 8H), 1.36 – 1.13 (m, 80H), 0.83 (t, *J* = 7.0 Hz, 12H).

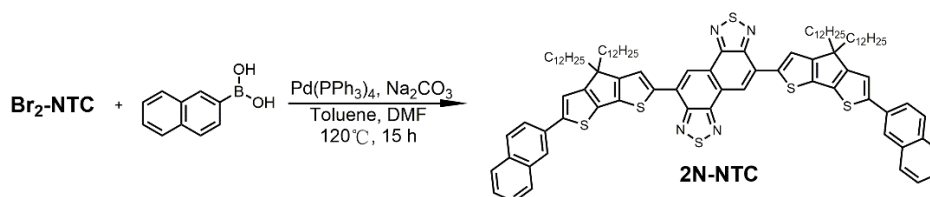

2N-NTC was prepared from Br<sub>2</sub>-NTC (150mg, 0.11 mmol) and naphthalen-2-ylboronic acid (90.3 mg, 0.53 mmol) in a procedure similar to that for 2N-NTT resulting in a dark-blue solid (120 mg, 75%). Melting point (Mp): 174 °C; <sup>1</sup>H NMR (400 MHz, dichloromethane-*d*<sub>2</sub>) δ 8.83 (d, *J* = 56.7 Hz, 2H), 8.26 (d, *J* = 15.2 Hz, 2H), 7.86 – 7.61 (m, 8H), 7.59 – 7.32 (m, 6H), 2.13 (d, *J* = 9.4 Hz, 8H), 1.38 – 1.11 (m, 80H), 0.82 (t, *J* = 6.9 Hz, 12H). <sup>13</sup>C NMR (126 MHz, CDCl<sub>3</sub>) δ 37.03, 30.85, 29.12, 28.64, 28.62, 28.60, 28.44, 28.29, 23.71, 21.63, 13.06. UV/Vis λ<sub>max</sub> 639 nm; MOLDI-TOF-MS (*m/z*): calcd. for C<sub>96</sub>H<sub>120</sub>N<sub>4</sub>S<sub>6</sub>, 1521.7871; found: 1521.7827; analysis (calcd., found for C<sub>96</sub>H<sub>120</sub>N<sub>4</sub>S<sub>6</sub>): C(75.74, 76.11), H(7.95, 7.87), S(12.64, 12.26), N(3.68, 3.70).

**5,10-bis(6-(9,9-dimethyl-9*H*-fluoren-2-yl)-4,4-didodecyl-4*H*-cyclopenta[2,1-*b*:3,4-*b'*]dithiophen-2-yl)naphtho[1,2-*c*:5,6-*c'*]bis([1,2,5]thiadiazole) (Flu-NTC)**

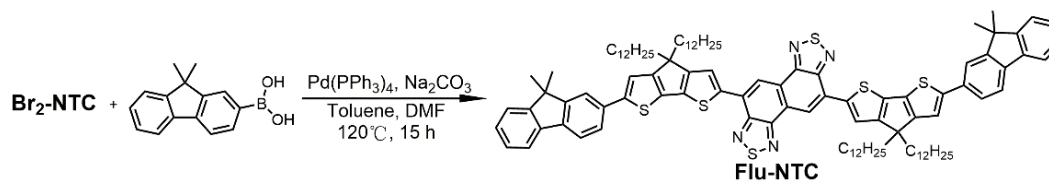

Flu-NTC was prepared from Br<sub>2</sub>-NTC (150 mg, 0.11 mmol) and (9,9-dimethyl-9*H*-fluoren-2-yl)boronic acid (125 mg, 0.55 mmol) in a procedure similar to that for 2N-NTT resulting in a dark-green solid (85.9 mg, 59.3%). <sup>1</sup>H NMR (400 MHz, Chloroform-*d*) δ 8.93 (s, 2H), 8.20 (s, 2H), 7.73 – 7.66 (m, 6H), 7.63 (dd, *J* = 7.8, 1.6 Hz, 2H), 7.47 – 7.43 (m, 2H), 7.37 – 7.30 (m, 6H), 2.05 (q, *J* = 6.5 Hz, 9H), 1.57 (s, 12H), 1.27 – 1.10 (m, 80H), 0.81 (t, *J* = 6.9 Hz, 12H).

$^{13}\text{C}$  NMR (126 MHz,  $\text{CDCl}_3$ )  $\delta$  153.80, 152.30, 127.35, 127.09, 124.27, 122.60, 120.02, 46.96, 38.15, 31.87, 30.18, 29.70, 29.66, 29.64, 29.62, 29.48, 29.32, 27.24, 24.71, 22.65, 14.08. UV/Vis  $\lambda_{\text{max}}$  431 nm; MOLDI-TOF-MS (m/z): calcd. for  $\text{C}_{106}\text{H}_{132}\text{N}_4\text{S}_6$ , 1653.8810; found: 1653.8831; analysis (calcd., found for  $\text{C}_{106}\text{H}_{132}\text{N}_4\text{S}_6$ ): C(76.95, 77.10), H(8.04, 8.08), S(11.63, 11.29), N(3.39, 3.47).

**4,4'-(benzo[1,2-*c*:4,5-*c'*]bis([1,2,5]thiadiazole)-4,7-diylbis(3-(2-ethylhexyl)thiophene-5,2-diyl))bis(*N,N*-bis(4-methoxyphenyl)ani-line) (TPAOMe-BBTT)**

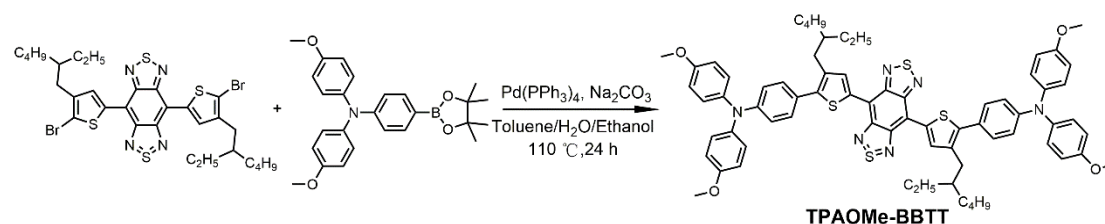

TPAOMe-BBTT was prepared from 4,7-dibromobenzo[1,2-*c*:4,5-*c'*]bis([1,2,5]thiadiazole) (120 mg, 0.16 mmol) and 4-methoxy-*N*-(4-methoxyphenyl)-*N*-(4-(4,4,5,5-tetramethyl-1,3,2-dioxaborolan-2-yl)phenyl)aniline (209.6 mg, 0.49 mmol). The synthesis procedures are similar to that of An-TDPP resulting in a green dark solid product (59.9 mg, 31.5%).  $^1\text{H}$  NMR (400 MHz, Chloroform-*d*)  $\delta$  8.83 (s, 2H), 7.40 (dd,  $J = 8.5, 3.4$  Hz, 4H), 7.12 (dt,  $J = 9.8, 2.2$  Hz, 8H), 6.98 (d,  $J = 8.1$  Hz, 4H), 6.86 (dt,  $J = 9.5, 2.2$  Hz, 8H), 3.81 (t,  $J = 2.2$  Hz, 12H), 2.77 (d,  $J = 7.0$  Hz, 4H), 1.40 – 1.17 (m, 26H), 0.85 (q,  $J = 7.3, 6.8$  Hz, 12H). MOLDI-TOF-MS (m/z): calcd. for  $\text{C}_{70}\text{H}_{72}\text{N}_6\text{O}_4\text{S}_4$ , 1188.4498; found: 1188.4316.

## 2. Results

### 2.1. HPLC, UV-vis-NIR absorption, PL emission and CV spectra

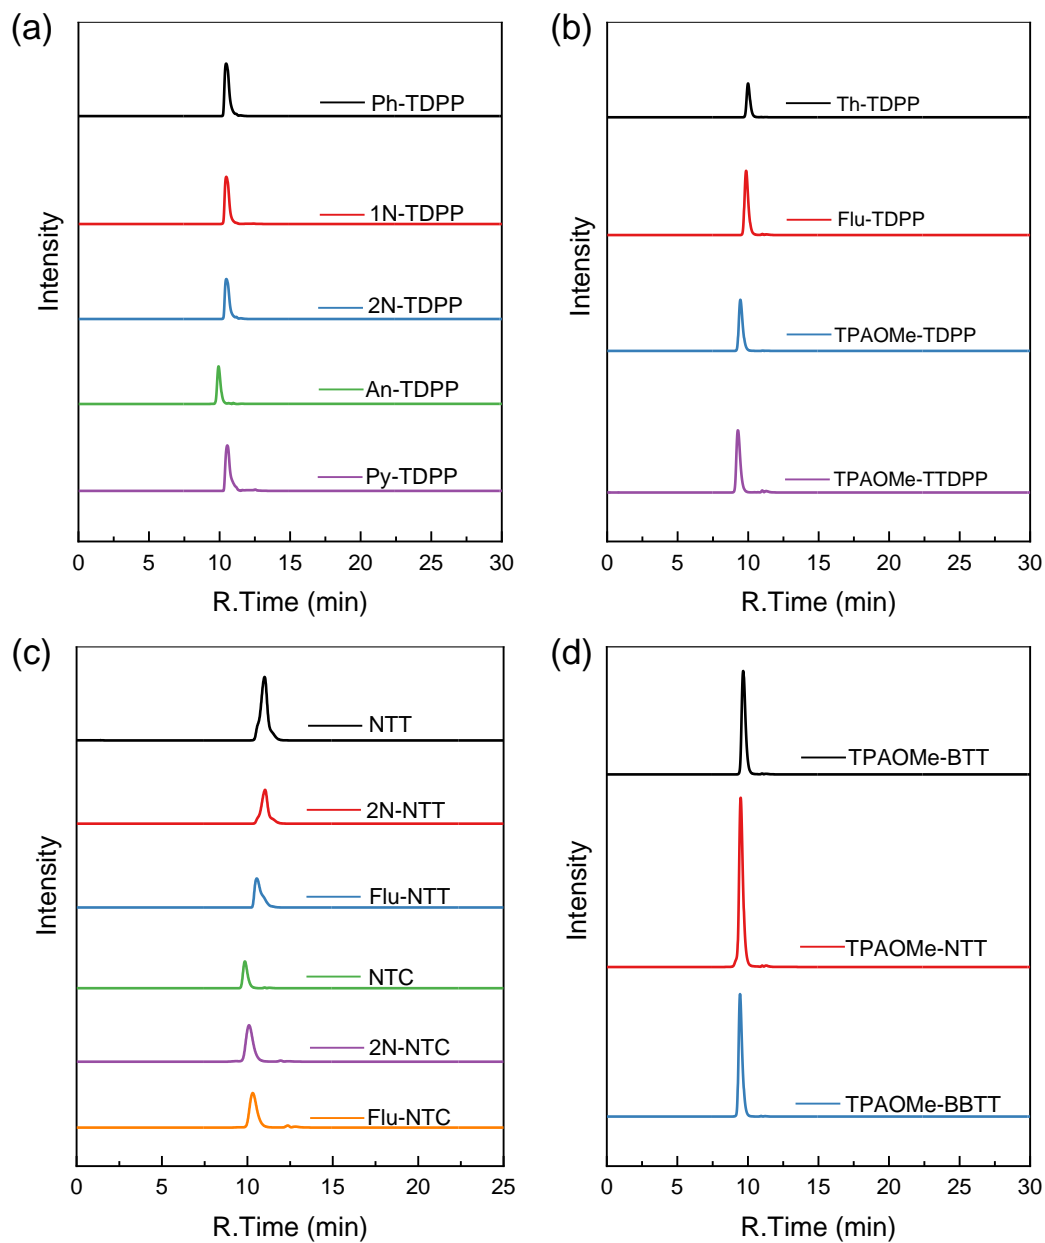

**Supplementary Figure 3.** HPLC analysis for (a, b) DPP, (c) NT, (d) TPA-based molecules with Cosmosil 5C<sub>18</sub>-MS-II column.

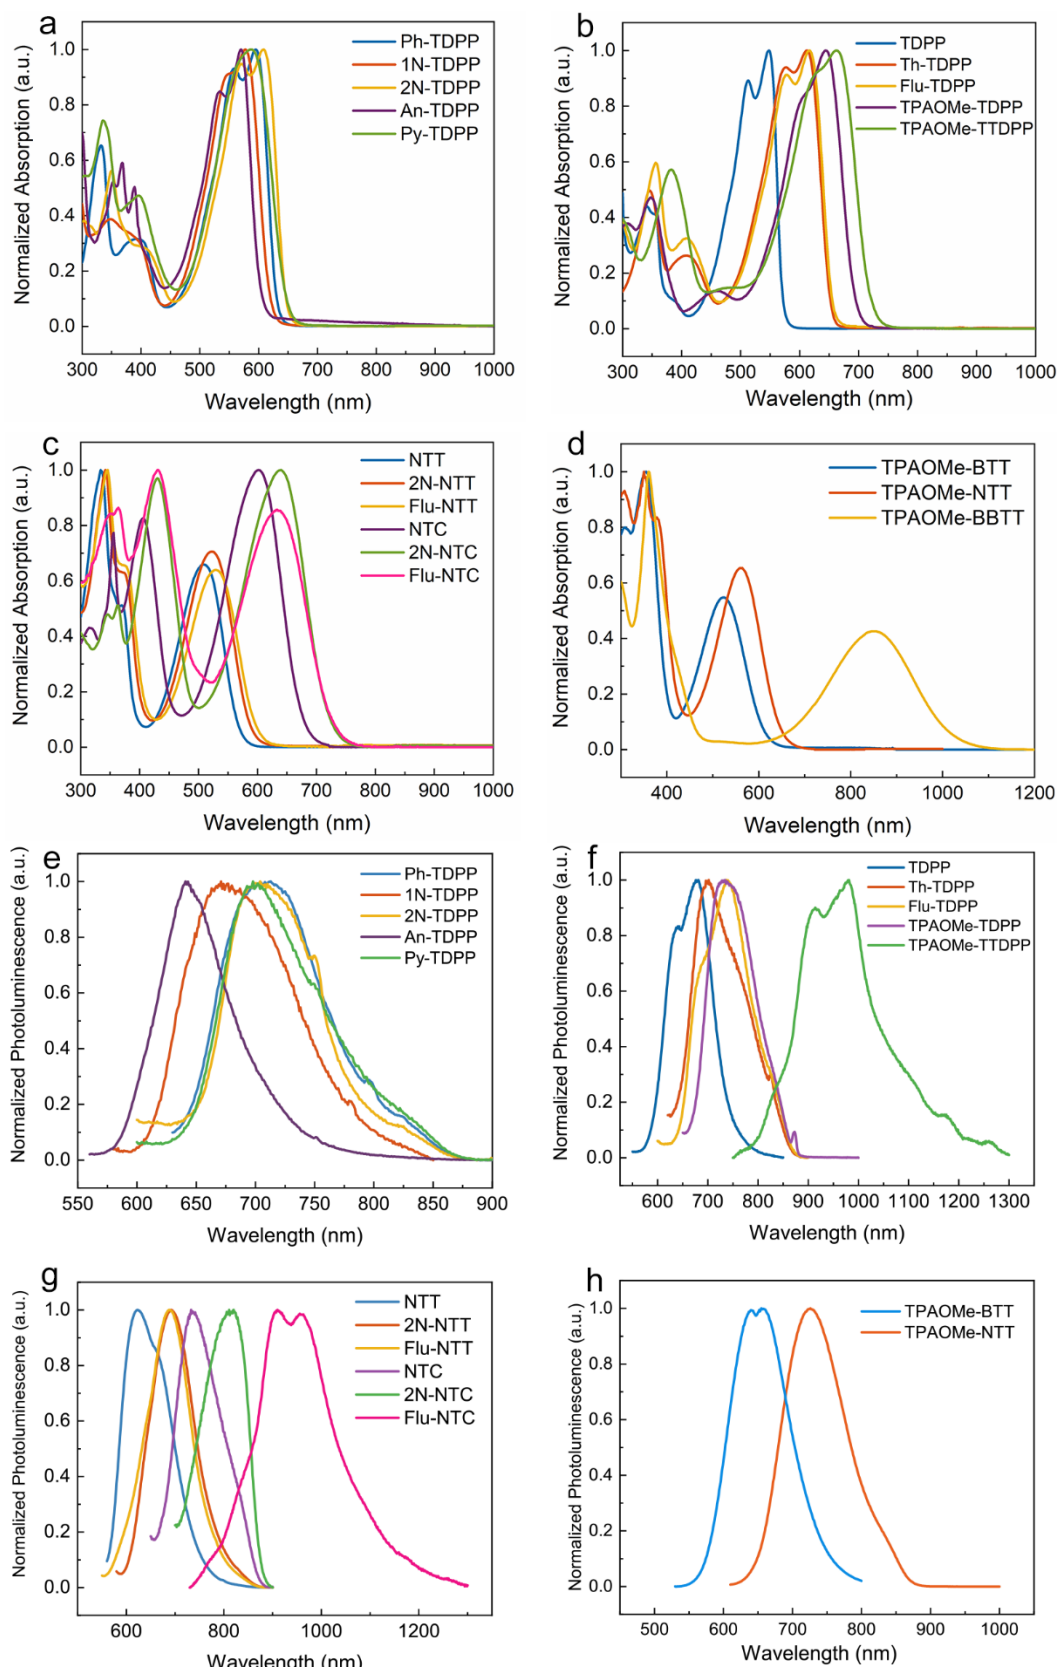

**Supplementary Figure 4.** The UV-vis-NIR absorption spectra of (a) DPP-based small molecules with fused-phenyl groups, (b) TDPP, Th-TDPP, Flu-TDPP, TPAOMe-TDPP and TPAOMe-TTDDP, (c) NT-based small molecules, and (d) BT-based small molecules in solution. The photoluminescence spectra of (e) DPP-based small molecules with fused-phenyl groups, (f) TDPP, Th-TDPP, Flu-TDPP, TPAOMe-TDPP and TPAOMe-TTDDP, (g) NT-based small molecules, and (h) TPAOMe-based small molecules in film.



**Supplementary Table 1. Optical properties of the materials.**

| Materials   | $\lambda_{\text{max}}^{\text{abs}[a]}$<br>[nm] | $\lambda_{\text{max}}^{\text{abs}[b]}$<br>[nm] | $\lambda_{\text{max}}^{\text{pl}[c]}$<br>[nm] | $\lambda_{\text{inter}}[d]$<br>[nm] | $E_{\text{g}}^{\text{opt}[e]}$<br>[eV] | HOMO <sup>f</sup><br>[eV] | LUMO <sup>g</sup><br>[eV] |
|-------------|------------------------------------------------|------------------------------------------------|-----------------------------------------------|-------------------------------------|----------------------------------------|---------------------------|---------------------------|
| Ph-TDPP     | 595                                            | 633                                            | 712                                           | 662                                 | 1.87                                   | -5.38                     | -3.51                     |
| 1N-TDPP     | 577                                            | 600                                            | 671                                           | 634                                 | 1.96                                   | -5.44                     | -3.48                     |
| 2N-TDPP     | 608                                            | 650                                            | 704                                           | 676                                 | 1.84                                   | -5.23                     | -3.39                     |
| An-TDPP     | 570                                            | 582                                            | 642                                           | 614                                 | 2.02                                   | -5.31                     | -3.29                     |
| Py-TDPP     | 587                                            | 630                                            | 698                                           | 668                                 | 1.86                                   | -5.14                     | -3.28                     |
| TDPP        | 548                                            | 565                                            | 679                                           | 592                                 | 2.09                                   | -5.36                     | -3.27                     |
| Th-TDPP     | 612                                            | 639                                            | 700                                           | 666                                 | 1.86                                   | -5.14                     | -3.28                     |
| Flu-TDPP    | 617                                            | 639                                            | 740                                           | 670                                 | 1.85                                   | -5.25                     | -3.40                     |
| TPAOMe-TDPP | 644                                            | 660                                            | 730                                           | 694                                 | 1.79                                   | -4.94                     | -3.15                     |
| TPAOMe-TDPP | 663                                            | 693                                            | 978                                           | 784                                 | 1.58                                   | -4.94                     | -3.36                     |
| NTT         | 508                                            | 543                                            | 623                                           | 603                                 | 2.06                                   | -5.80                     | -3.74                     |
| 2N-NTT      | 524                                            | 562                                            | 692                                           | 626                                 | 1.98                                   | -5.50                     | -3.52                     |
| Flu-NTT     | 530                                            | 554                                            | 690                                           | 610                                 | 2.03                                   | -5.52                     | -3.49                     |
| NTC         | 602                                            | 623                                            | 735                                           | 685                                 | 1.81                                   | -5.26                     | -3.45                     |
| 2N-NTC      | 640                                            | 652                                            | 817                                           | 738                                 | 1.68                                   | -5.28                     | -3.60                     |
| Flu-NTC     | 633                                            | 672                                            | 909                                           | 778                                 | 1.59                                   | -5.35                     | -3.76                     |
| TPAOMe-BTT  | 523                                            | 541                                            | 655                                           | 591                                 | 2.10                                   | -5.07                     | -2.97                     |
| TPAOMe-NTT  | 560                                            | 574                                            | 725                                           | 646                                 | 1.92                                   | -4.98                     | -3.06                     |
| TPAOMe-BBTT | 854                                            | 879                                            | /                                             | 1133 <sup>h</sup>                   | 1.09                                   | -4.67                     | -3.58                     |

<sup>a</sup>Wavelength of maximum absorption in chloroform solutions, <sup>b</sup>wavelength of maximum absorption in thin films, <sup>c</sup>wavelength of maximum emission in thin films, <sup>d</sup>calculated from the intersection of absorption and emission curves of pristine thin films, <sup>e</sup> $E_{\text{g}}^{\text{opt}}=1240/\lambda_{\text{inter}}$ , <sup>f</sup> $E_{\text{HOMO}}=-e(E_{\text{ox}} + 4.67)$ . <sup>g</sup> $E_{\text{LUMO}}=E_{\text{HOMO}} + E_{\text{g}}$ . <sup>h</sup>The absorption wavelength of TPAOMe-BBTT was determined as the onset of the absorption curve because of the weak fluorescence.

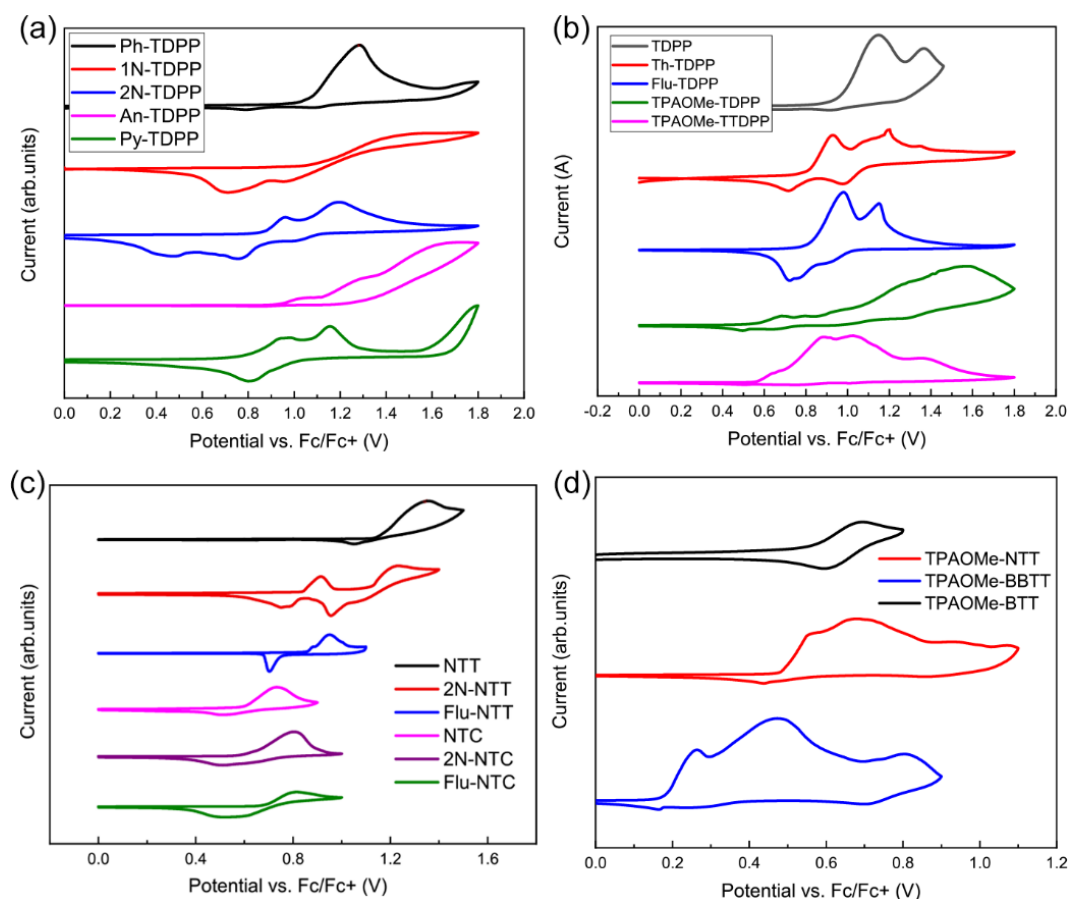

**Supplementary Figure 5.** Cyclic voltammetry curves of (a, b) DPP, (c) NT, (d) TPA-based molecules in thin films using  $n$ -Bu<sub>4</sub>NPF<sub>6</sub> as electrolytes.

## 2.2. Theoretical calculations

The diradical index of organic materials is sensitive to computational methods utilized.<sup>20</sup> We have analyzed the open-shell character of the materials with several methods to confirm their diradical and polyradical characters. Using the spin-projected unrestricted Hartree-Fock (PUHF) method we find that all the materials possess variable open-shell character (Supplementary Table 2), which correlates with their bandgap. As the PUHF method prone to a large spin contamination, we have tested the widely accepted broken symmetry<sup>21</sup> (BS) approach with different density functionals. However, unlike the other open-shell small materials<sup>22-24</sup> or polymers<sup>25-26</sup>, the conventional BS approach did not predict open-shell character in the current set of molecules, except for the TPAOMe-BBTT with very small diradical character ( $\gamma_0 = 0.03$ , using Yamaguchi formula). For example, Rudebusch *et al.* predicted diradical character ( $\gamma_0 = 0.088$  to  $0.273$ ) for benzothiophene-based acenes using tuned LC-RBLYP CASCI(2,2) (Complete Active Space Configuration Interaction).<sup>22</sup> With the same approach, 2N-NTC and TPAOMe-TDPP molecules provide a negligible diradical character ( $\gamma_0 = 0.003$  and  $0.008$ , respectively) indicating diradical character is not as pronounced in the current set of molecules than the ones reported by Haley and coworkers.<sup>22</sup> We believe this to be due to the presence of numerous heteroatoms in the current set of molecules.

Another simple but elegant method to estimate the open-shell character is proposed by Grimme *et al.*, which is the fractional occupation number weighted electron density ( $N_{\text{FOD}}$ ).<sup>27</sup> Fractional

orbital density (FOD) is an extremely simple and cost-effective method based on smearing the electrons over the molecular orbitals using finite temperature DFT (FT-DFT).  $N_{\text{FOD}}$  accurately quantifies the static electron correlation and molecules with a delocalized FOD and a large  $N_{\text{FOD}}$  have multireference character. Supplementary Table 3 shows the  $N_{\text{FOD}}$  values of the molecules studied in this work. A large  $N_{\text{FOD}}$  values reveal that the electrons are strongly correlated, and different materials provide different  $N_{\text{FOD}}$  values. Interestingly, the trends are qualitatively consistent with diradical index computed from PUHF (see Supplementary Table 2), showing good linear correlation between  $N_{\text{FOD}}$  and  $y_0$ .

To better understand the radical nature for these molecules, we explore their open-shell characters ( $y_i$ ) using fractional orbital occupancy. Supplementary Table 4 shows the  $y_0$ ,  $y_1$ ,  $y_2$  and  $y_3$  values for all the molecules computed using the FT-DFT at B3LYP/6-31G(d,p) level of theory and basis set. Our result reveals polyradical character in all the molecules.

The spatial distribution of unpaired electrons in these molecules are evaluated using FOD plots (see Fig. S14-S16). FOD plots show partially delocalized/localized electron density distribution along the molecular backbones, disclosing strongly correlated electrons.

We have also computed the vertical singlet-triplet energy gap ( $\Delta E_{\text{ST}}$ ) using FT-DFT with B3LYP/6-31G(d,p) and the results are presented in Supplementary Table 3. It was shown that the  $\Delta E_{\text{ST}}$  gap computed using FT-DFT is comparable to that of CASPT2 (complete active space perturbation theory) method.<sup>28</sup> The computed  $\Delta E_{\text{ST}}$  gap for 2N-NTC (11.03 kcal/mol) and TPAOMe-TTDPP (10.65 kcal/mol) is overestimated compared to the experimental gap, 4.76 and 5.52 kcal/mol, respectively. We believe this is due to the medium effects that we are not able to capture in the isolated molecule calculations. However, we find a good correlation between  $y_0$  (and  $N_{\text{FOD}}$ ) and  $\Delta E_{\text{ST}}$  gap using FT-DFT method, a larger  $N_{\text{FOD}}$  value indicates a smaller  $\Delta E_{\text{ST}}$  gap.

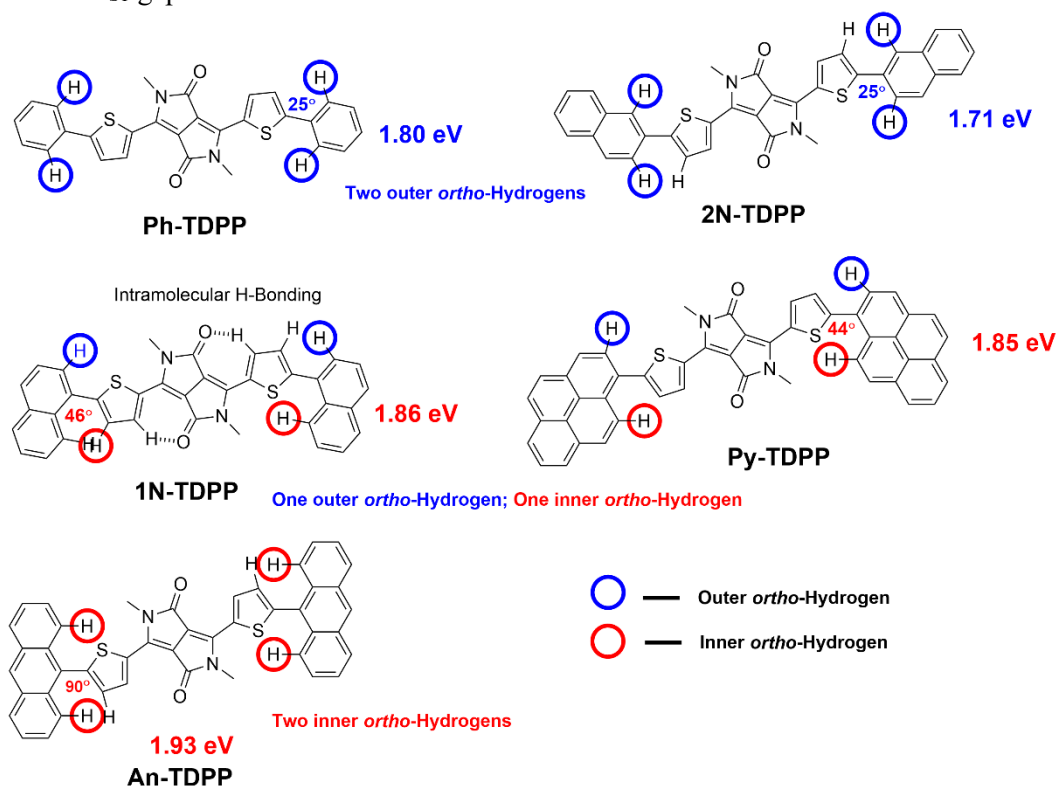

**Supplementary Figure 6.** Intramolecular twist angles calculated at RB3LYP/6-31G(d,p) level of theory and basis set of DPP molecules indicated by the outer and inner *ortho*-hydrogens (blue and red circles,

respectively).

**Supplementary Table 2. Calculated electronic and optical properties of the molecules.**

| Materials   | PUHF <sup>a</sup> |       | FT-DFT <sup>b</sup> |       | $\lambda^c$<br>(nm) | Transition <sup>d</sup> | Contribution <sup>e</sup><br>(%) | HOMO <sup>f</sup><br>(eV) | LUMO <sup>g</sup><br>(eV) | $E_g^h$<br>(eV) |
|-------------|-------------------|-------|---------------------|-------|---------------------|-------------------------|----------------------------------|---------------------------|---------------------------|-----------------|
|             | $y_0$             | $y_1$ | $y_0$               | $y_1$ |                     |                         |                                  |                           |                           |                 |
| Ph-TDPP     | 0.295             | 0.048 | 0.481               | 0.118 | 556.85              | H → L                   | 97.5                             | -4.81                     | -2.58                     | 2.23            |
| 1N-TDPP     | 0.283             | 0.072 | 0.476               | 0.136 | 546.88              | H → L                   | 96.8                             | -4.82                     | -2.55                     | 2.27            |
| 2N-TDPP     | 0.313             | 0.078 | 0.581               | 0.163 | 567.68              | H → L                   | 96.6                             | -4.78                     | -2.60                     | 2.18            |
| An-TDPP     | 0.237             | 0.156 | 0.443               | 0.218 | 514.57              | H → L                   | 97.7                             | -4.91                     | -2.48                     | 2.43            |
| Py-TDPP     | 0.310             | 0.142 | 0.495               | 0.205 | 563.49              | H → L                   | 92.6                             | -4.78                     | -2.59                     | 2.19            |
| TDPP        | 0.223             | 0.019 | 0.431               | 0.070 | 502.31              | H → L                   | 99.0                             | -4.97                     | -2.52                     | 2.45            |
| Th-TDPP     | 0.335             | 0.067 | 0.519               | 0.150 | 589.68              | H → L                   | 96.7                             | -4.78                     | -2.68                     | 2.10            |
| Flu-TDPP    | 0.317             | 0.073 | 0.511               | 0.155 | 576.86              | H → L                   | 95.9                             | -4.71                     | -2.56                     | 2.15            |
| TPAOMe-TDPP | 0.309             | 0.056 | 0.538               | 0.148 | 593.29              | H → L                   | 89.1                             | -4.35                     | -2.29                     | 2.06            |
| TPAOMe-TDPP | 0.379             | 0.112 | 0.539               | 0.182 | 639.63              | H → L                   | 84.5                             | -4.40                     | -2.50                     | 1.90            |
| NTT         | 0.269             | 0.054 | 0.391               | 0.116 | 500.04              | H → L                   | 96.9                             | -5.36                     | -2.88                     | 2.48            |
| 2N-NTT      | 0.306             | 0.084 | 0.434               | 0.132 | 539.84              | H → L                   | 93.0                             | -5.12                     | -2.87                     | 2.25            |
| Flu-NTT     | 0.306             | 0.080 | 0.443               | 0.136 | 546.80              | H → L                   | 91.3                             | -5.04                     | -2.83                     | 2.21            |
| NTC         | 0.357             | 0.105 | 0.466               | 0.145 | 616.24              | H → L                   | 94.3                             | -4.80                     | -2.83                     | 1.97            |
| 2N-NTC      | 0.396             | 0.160 | 0.493               | 0.189 | 651.90              | H → L                   | 91.1                             | -4.70                     | -2.86                     | 1.84            |
| Flu-NTC     | 0.396             | 0.159 | 0.500               | 0.194 | 658.24              | H → L                   | 90.2                             | -4.64                     | -2.83                     | 1.81            |
| TPAOMe-BTT  | 0.264             | 0.047 | 0.445               | 0.102 | 536.80              | H → L                   | 75.7                             | -4.47                     | -2.37                     | 2.10            |
| TPAOMe-NTT  | 0.304             | 0.071 | 0.480               | 0.145 | 570.34              | H → L                   | 71.3                             | -4.55                     | -2.68                     | 1.87            |
| TPAOMe-BBTT | 0.665             | 0.047 | 0.827               | 0.094 | 729.64              | H → L                   | 43.4                             | -4.34                     | -3.04                     | 1.30            |

<sup>a</sup>Diradical character index ( $y_0$ ) and tetraradical character index ( $y_1$ ) calculated with PUHF/6-31G(d,p).

<sup>b</sup>Diradical character index ( $y_0$ ) and tetraradical character index ( $y_1$ ) calculated with FT-DFT/B3LYP/6-31G(d,p).

<sup>c</sup>Wavelength of the excitation from the ground to the first excited state. <sup>d</sup>Orbitals involved in the transition.

<sup>e</sup>Contribution of individual orbitals in the transition. <sup>f</sup>The highest occupied molecular orbital (HOMO) and the <sup>g</sup>lowest unoccupied molecular orbital (LUMO) energies calculated at (U)B3LYP/6-31G(d,p) level theory and basis set.

<sup>h</sup>The calculated energy gap ( $E_g$ ) between the HOMO and LUMO. The excited state calculations are performed on the ground state geometry with PCM(chloroform)/TDDFT/BHandHLYP/6-31G(d,p) level of theory and basis set. All energies are in eV,  $\lambda$  is in nm and  $y_0$  and  $y_1$  are dimensionless quantity. H = HOMO, L = LUMO.

**Supplementary Table 3.  $N_{\text{FOD}}$  and vertical singlet-triplet energy gap for the molecules computed using FT-DFT at B3LYP/6-31G(d,p) level.**

| Materials   | $N_{\text{FOD}}$ | Vertical $\Delta E_{\text{ST}}$ gap<br>(kcal/mol) |
|-------------|------------------|---------------------------------------------------|
| TDPP        | 1.104            | 23.02                                             |
| 1N-TDPP     | 1.801            | 15.47                                             |
| 2N-TDPP     | 2.081            | 13.64                                             |
| An-TDPP     | 2.261            | 12.21                                             |
| Th-TDPP     | 1.653            | 16.82                                             |
| Flu-TDPP    | 1.946            | 14.75                                             |
| Ph-TDPP     | 1.517            | 18.13                                             |
| Py-TDPP     | 2.362            | 12.14                                             |
| TPAOMe-TDPP | 2.470            | 11.92                                             |
| TPAOMe-TDPP | 2.816            | 10.65                                             |
| NTT         | 1.311            | 20.72                                             |
| 2N-NTT      | 2.016            | 14.40                                             |
| Flu-NTT     | 2.093            | 14.07                                             |
| NTC         | 1.909            | 14.95                                             |
| 2N-NTC      | 2.689            | 11.03                                             |
| Flu-NTC     | 2.769            | 10.84                                             |
| TPAOMe-BTT  | 2.277            | 13.08                                             |
| TPAOMe-NTT  | 2.636            | 11.40                                             |
| TPAOMe-BBTT | 3.017            | 10.06                                             |

**Supplementary Table 4. Computed radical indices ( $y_i$ ) using FT-DFT at B3LYP/6-31G(d,p) level.**

| Materials   | Fractional Orbital Occupancy |       |       |       |
|-------------|------------------------------|-------|-------|-------|
|             | $y_0$                        | $y_1$ | $y_2$ | $y_3$ |
| TDPP        | 0.431                        | 0.070 | 0.018 | 0.009 |
| 1N-TDPP     | 0.476                        | 0.136 | 0.095 | 0.055 |
| 2N-TDPP     | 0.581                        | 0.163 | 0.094 | 0.070 |
| An-TDPP     | 0.443                        | 0.218 | 0.218 | 0.074 |
| Th-TDPP     | 0.519                        | 0.150 | 0.063 | 0.026 |
| Flu-TDPP    | 0.511                        | 0.155 | 0.084 | 0.043 |
| Ph-TDPP     | 0.481                        | 0.118 | 0.047 | 0.026 |
| Py-TDPP     | 0.495                        | 0.205 | 0.161 | 0.072 |
| TPAOMe-TDPP | 0.538                        | 0.148 | 0.069 | 0.069 |
| TPAOMe-TDPP | 0.539                        | 0.182 | 0.108 | 0.069 |
| NTT         | 0.391                        | 0.116 | 0.066 | 0.028 |
| 2N-NTT      | 0.434                        | 0.133 | 0.112 | 0.095 |
| Flu-NTT     | 0.443                        | 0.136 | 0.115 | 0.094 |
| NTC         | 0.466                        | 0.145 | 0.121 | 0.088 |
| 2N-NTC      | 0.493                        | 0.189 | 0.170 | 0.121 |
| Flu-NTC     | 0.500                        | 0.194 | 0.174 | 0.123 |
| TPAOMe-BTT  | 0.445                        | 0.102 | 0.089 | 0.068 |
| TPAOMe-NTT  | 0.480                        | 0.145 | 0.112 | 0.083 |
| TPAOMe-BBTT | 0.827                        | 0.094 | 0.075 | 0.065 |

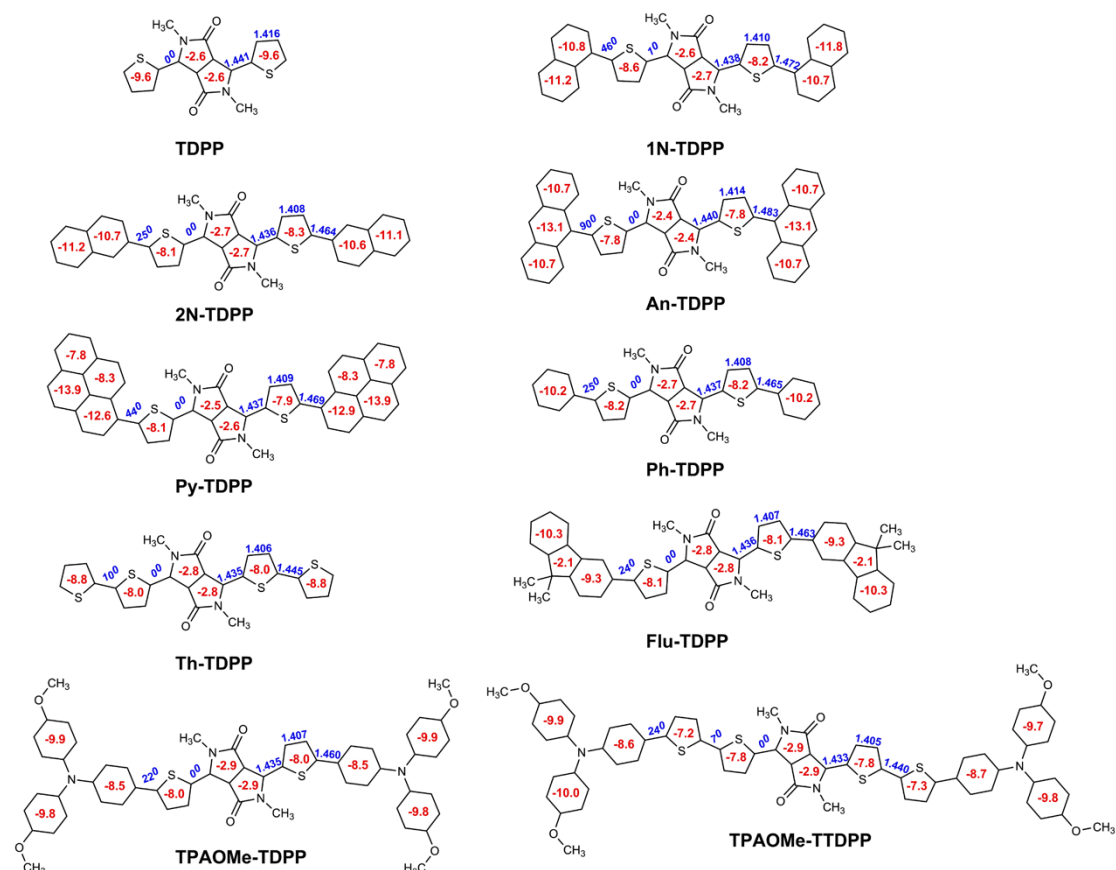

**Supplementary Figure 7.** Optimized geometric parameters and NICS<sub>iso</sub>(1) (ppm) values of the DPP-based molecules calculated at RB3LYP/6-31G(d,p) level of theory and basis set. Bond lengths are provided in Å.

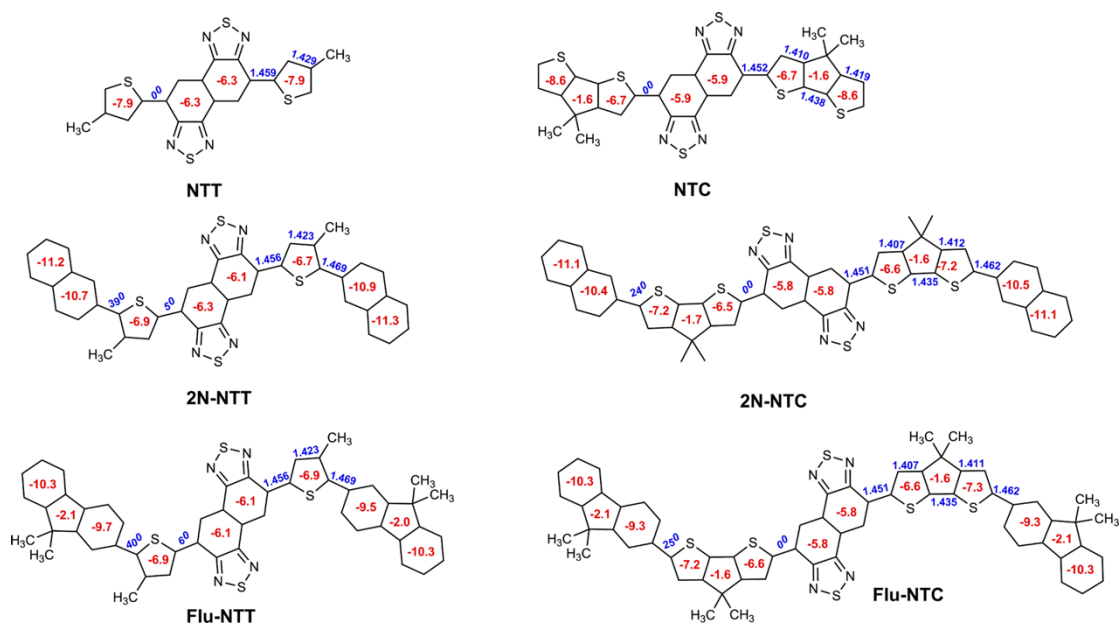

**Supplementary Figure 8.** Optimized geometric parameters and NICS<sub>iso</sub>(1) (ppm) values of the NT-based molecules calculated at RB3LYP/6-31G(d,p) level of theory and basis set. Bond lengths are provided in Å.

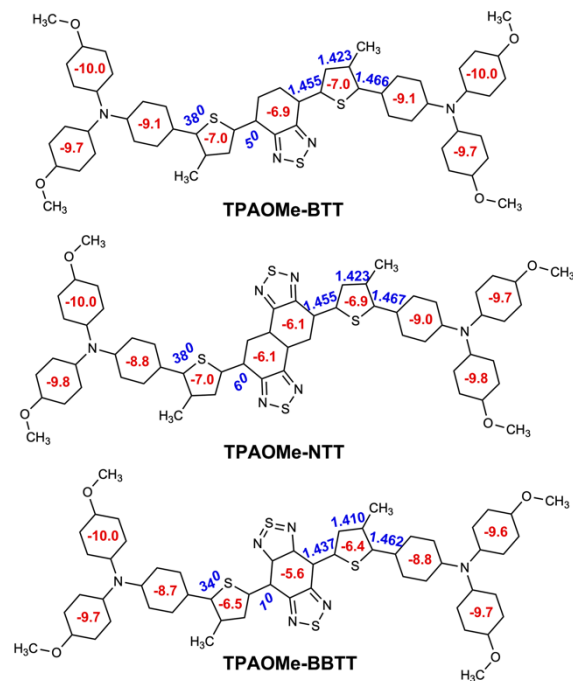

**Supplementary Figure 9.** Optimized geometric parameters and NICS<sub>iso</sub>(1) (ppm) values of the BT, NT, and BBT analogues calculated at (U)B3LYP/6-31G(d,p) level of theory and basis set. Bond lengths are provided in Å.

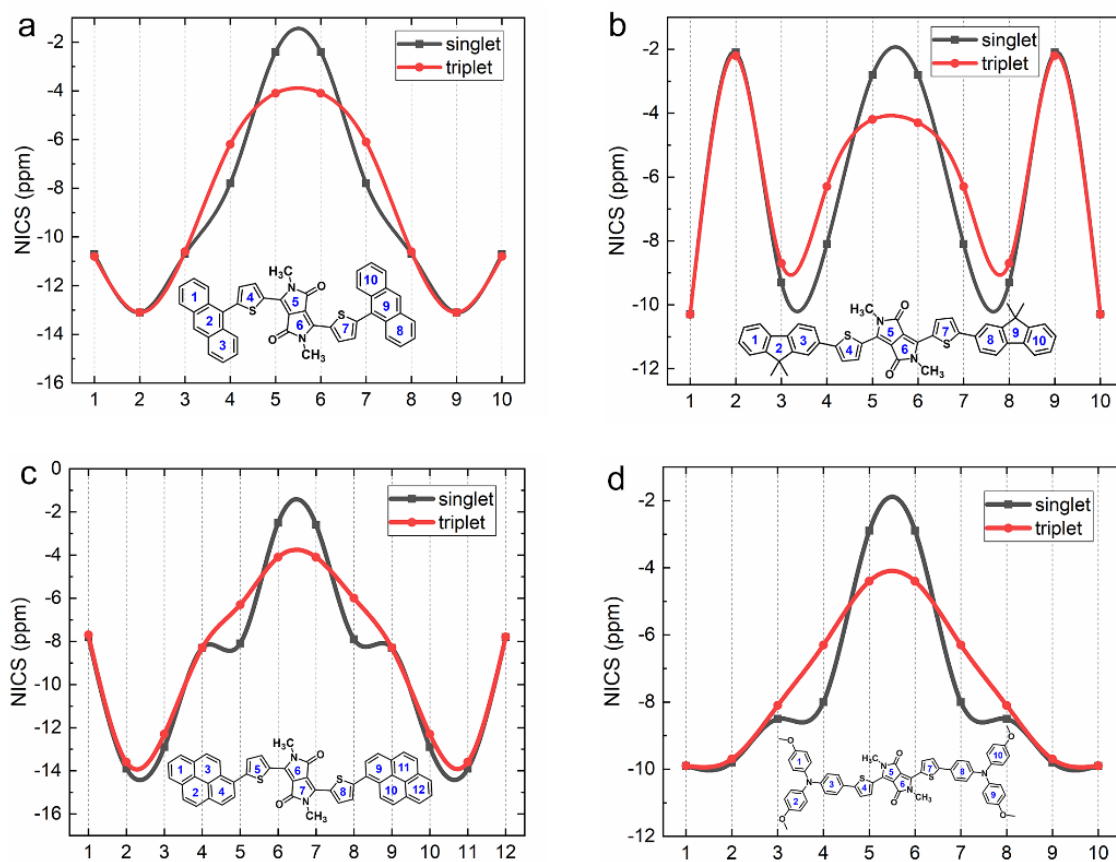

**Supplementary Figure 10.** The numerical trend of NICS<sub>iso</sub>(1) values (singlet and triplet) of (a) An-TDPP, (b) Flu-TDPP, (c) Py-TDPP, (d) TPAOMe-TDPP calculated at RB3LYP/6-31G(d,p) level of theory and basis set. All of these molecules show an increase of aromaticity from singlet to triplet state.



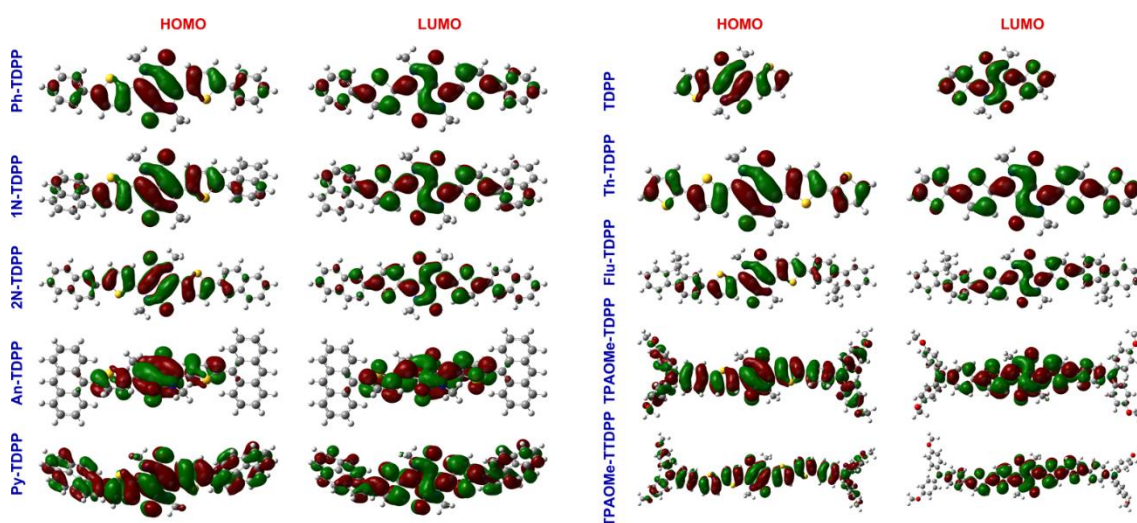

**Supplementary Figure 11.** The optimized ground-state geometry and molecular orbital (MO) diagrams of the DPP-based molecules calculated at RB3LYP/6-31G(d,p) level of theory and basis set. The green and red surfaces are drawn at isovalue =  $|0.02|$  au, which represents the positive and negative contributions on the wavefunctions, respectively. Color code for the atoms: grey for C, blue for N, red for O, and yellow for S.

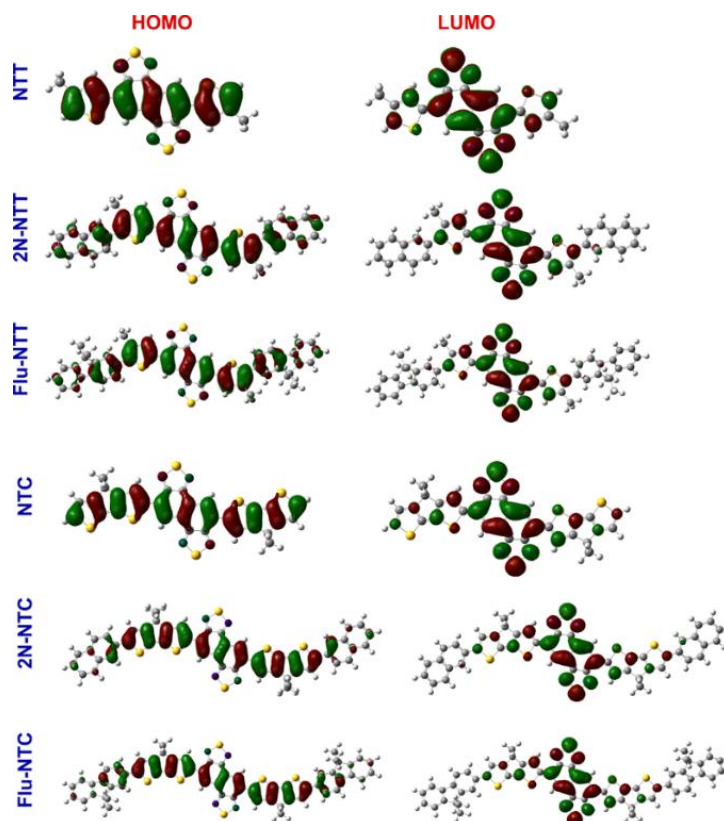

**Supplementary Figure 12.** The optimized ground-state geometry and molecular orbital (MO) diagrams of the NT-based molecules calculated at RB3LYP/6-31G(d,p) level of theory and basis set. The green and red surfaces are drawn at isovalue =  $|0.02|$  au, which represents the positive and negative contributions on the wavefunctions, respectively. Color code for the atoms: grey for C, blue for N, red for O, and yellow for S.

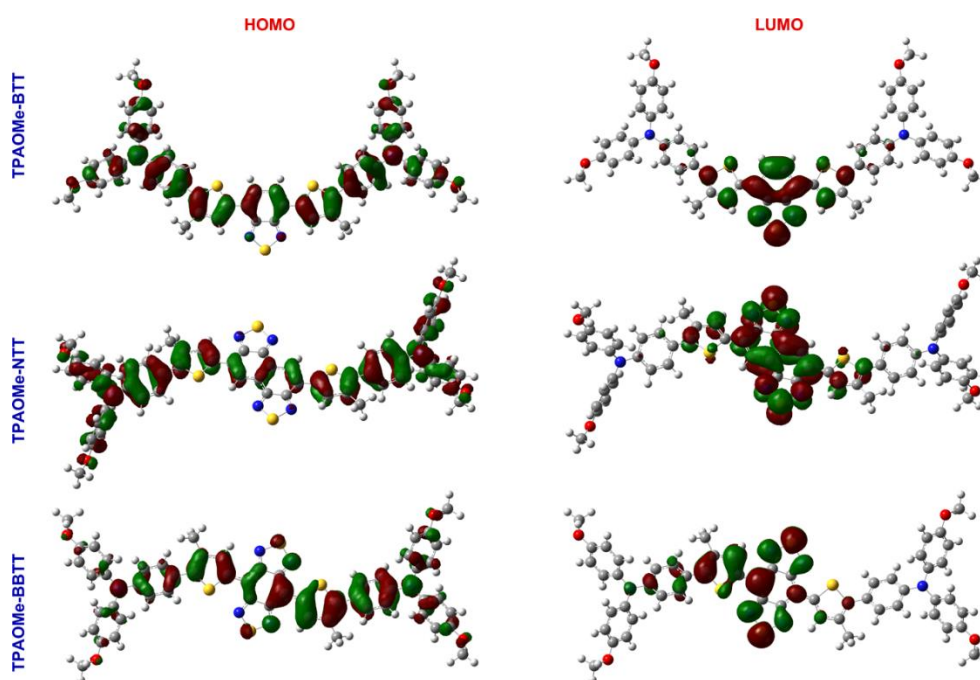

**Supplementary Figure 13.** The optimized ground-state geometry and molecular orbital (MO) diagrams of the BT, NT, and BBT analogues calculated at (U)B3LYP/6-31G(d,p) level of theory and basis set. The green and red surfaces are drawn at isovalue =  $|0.02|$  au, which represents the positive and negative contributions on the wavefunctions, respectively. Color code for the atoms: grey for C, blue for N, red for O, and yellow for S. In the case of the TPAOMe-BBTT,  $\alpha$ -SOMO and  $\alpha$ -LUMO is provided.

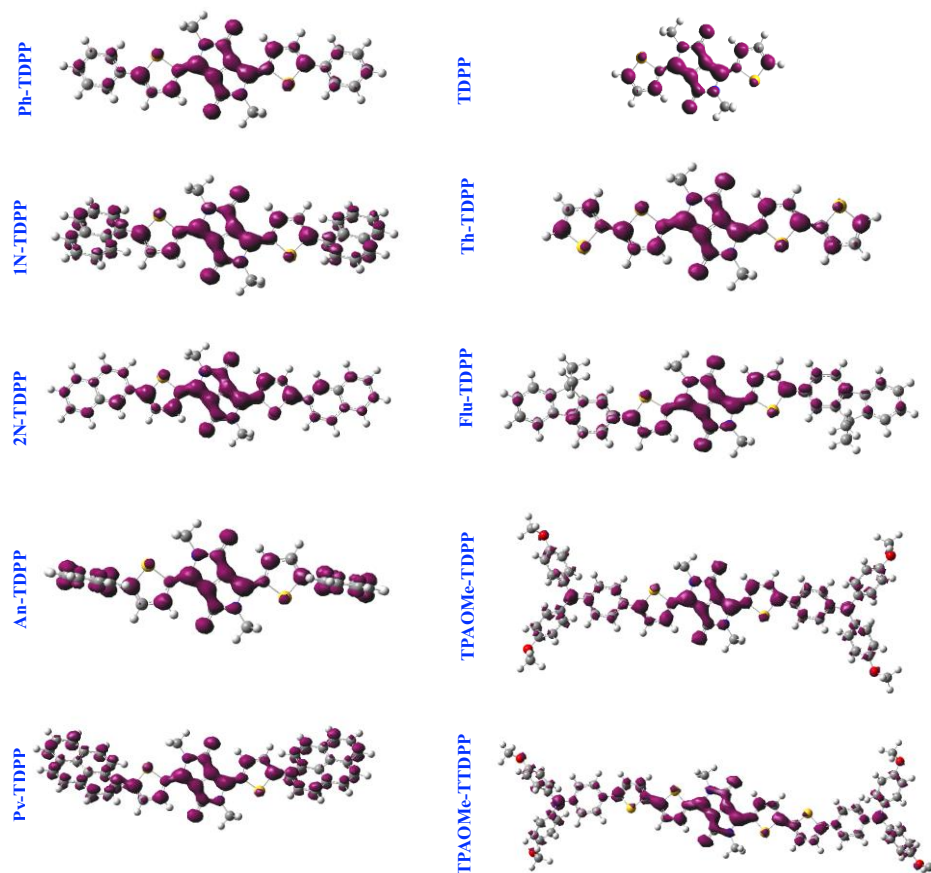

**Supplementary Figure 14.** FOD plots ( $\sigma = 0.002$  e/Bohr<sup>3</sup>) for DPP-based materials obtained from the FT-DFT at B3LYP/6-31G(d,p) level.

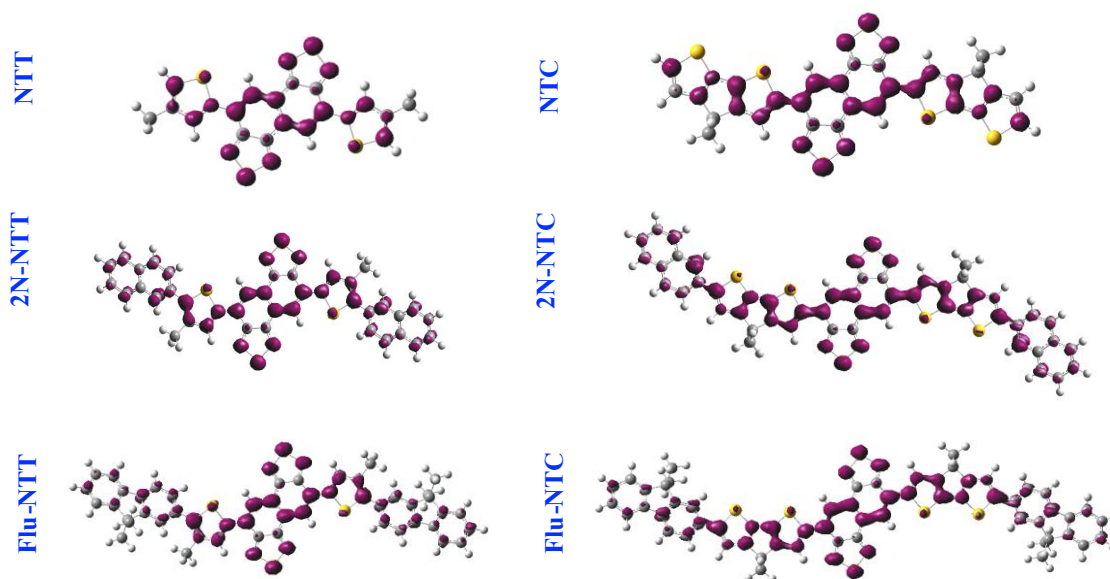

**Supplementary Figure 15.** FOD plots ( $\sigma = 0.002 \text{ e/Bohr}^3$ ) for NT-based materials obtained from the FT-DFT at B3LYP/6-31G(d,p) level.

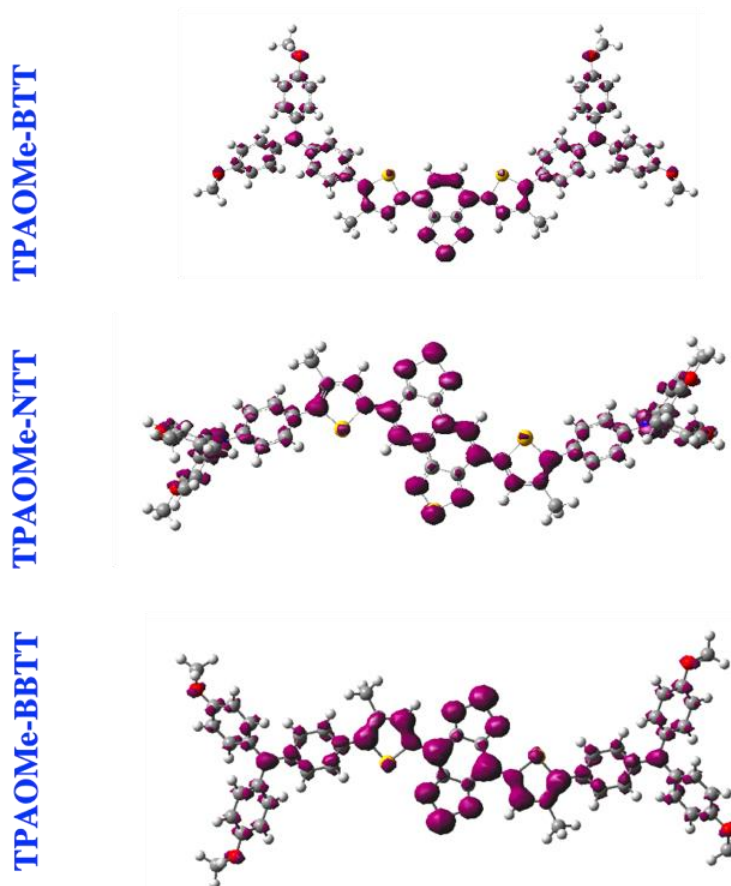

**Supplementary Figure 16.** FOD plots ( $\sigma = 0.002 \text{ e/Bohr}^3$ ) for BT, NT, and BBT analogues obtained from the FT-DFT at B3LYP/6-31G(d,p) level.

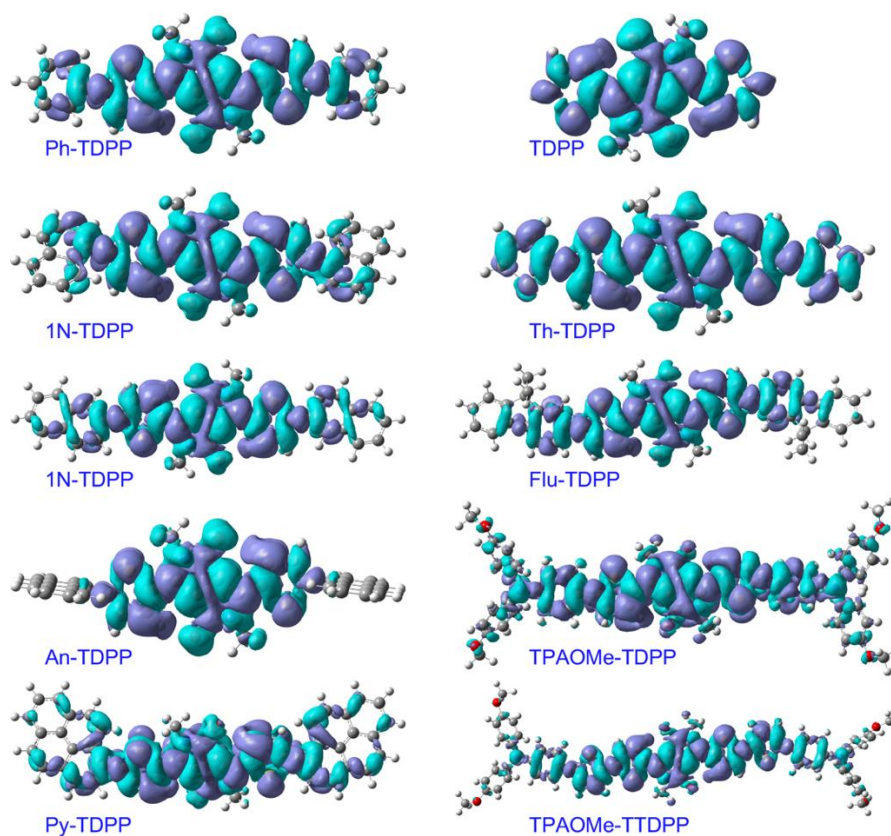

**Supplementary Figure 17.** Density difference ( $\Delta\rho = S_1 - S_0$ ) between the first singlet excited state ( $S_1$ ) to the ground state ( $S_0$ ) of the DPP-based molecules calculated at PCM/RBHandHLYP/6-31G(d,p) level of theory and basis set. The purple and blue-green surfaces represent the positive (density accumulation) and negative (density depletion) region, respectively. Isosurface value = 0.0001 au.

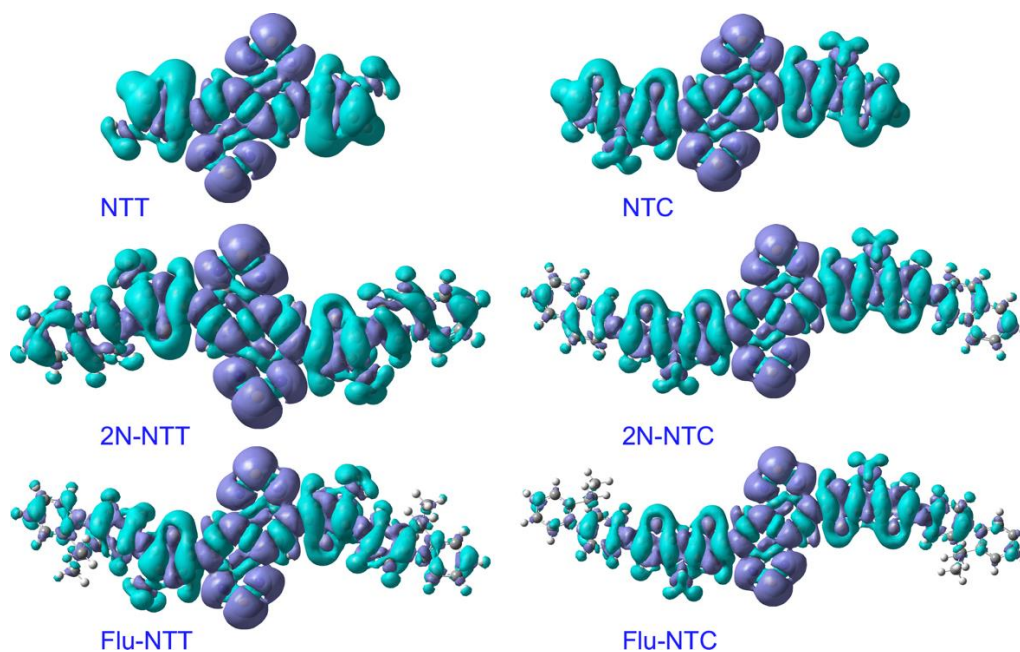

**Supplementary Figure 18.** Density difference ( $\Delta\rho = S_1 - S_0$ ) between the first singlet excited state ( $S_1$ ) to the ground state ( $S_0$ ) of the NT-based molecules calculated at PCM/RBHandHLYP/6-31G(d,p) level of theory and basis set. The purple and blue-green surfaces represent the positive (density accumulation) and negative (density depletion) region, respectively. Isosurface value = 0.0001 au.

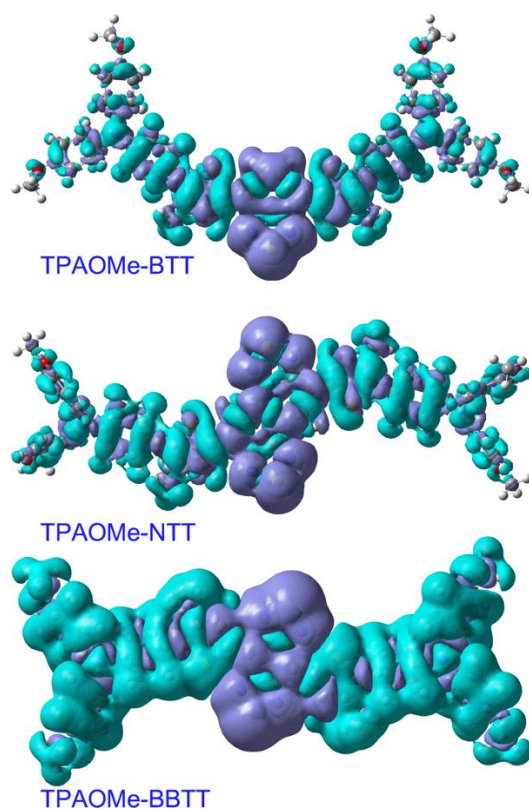

**Supplementary Figure 19.** Density difference ( $\Delta\rho = S_1 - S_0$ ) between the first singlet excited state ( $S_1$ ) to the ground state ( $S_0$ ) of the BT, NT, and BBT analogues calculated at PCM/(U)BHandHLYP/6-31G(*d,p*) level of theory and basis set. The purplish and blue-green surfaces represent the positive (density accumulation) and negative (density depletion) region, respectively. Isosurface value = 0.00001 au.

## 2.3. Electron spin resonance spectra

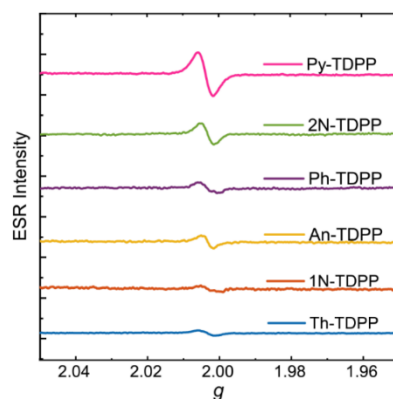

**Supplementary Figure 20.** ESR spectra measured at room temperature of DPP-based small molecules. The measurements were conducted under the same conditions and using the same molar quantity of each material at 0.02 mmol.

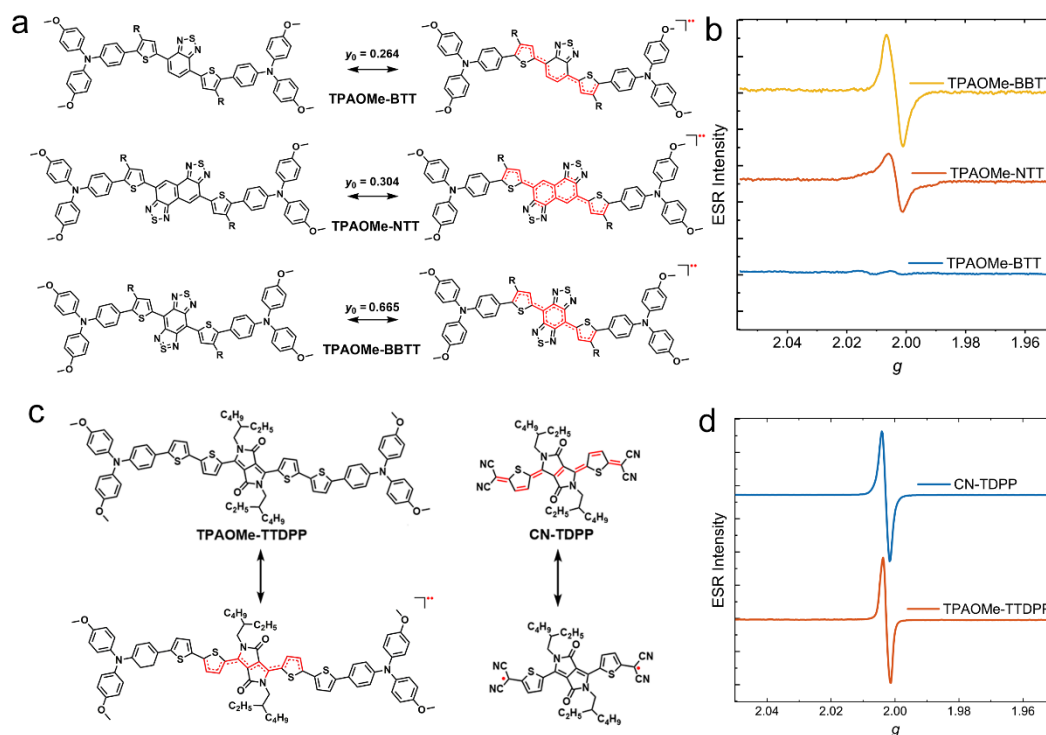

**Supplementary Figure 21.** (a) Resonance structures of TPAOMe-BTT, TPAOMe-NTT, and TPAOMe-BBTT. (b) ESR spectra of the small molecules. (c) Resonance structure of Chichibabin's analogue CN-TDPP and TPAOMe-TDPP in this work. (d) ESR spectra of the two small molecules. The measurements were conducted under the same conditions and using the same molar quantity of each material at 0.02 mmol.

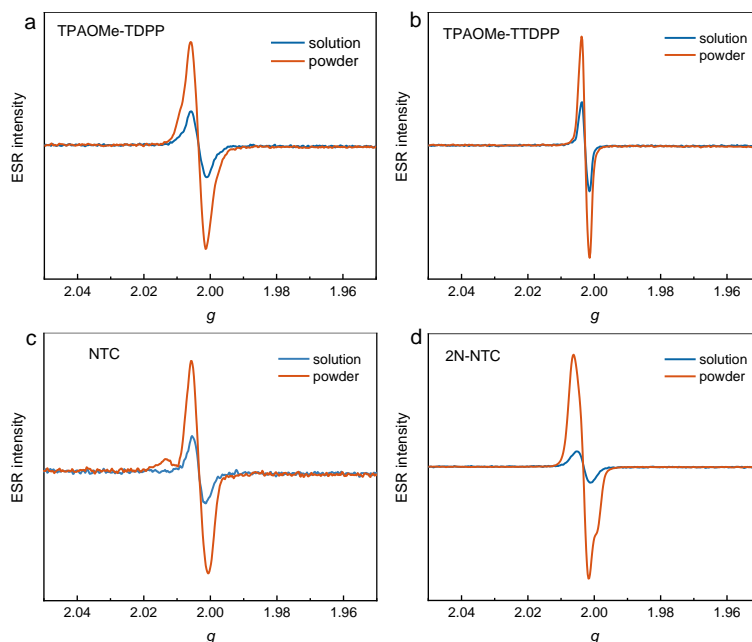

**Supplementary Figure 22.** ESR spectra of (a) TPAOMe-TDPP, (b) TPAOMe-TDPP, (c) NTC, (d) 2N-NTC in toluene solutions and in powders. The EPR spectra in powders and saturated solutions were conducted under the same test conditions in EPR sample tube.

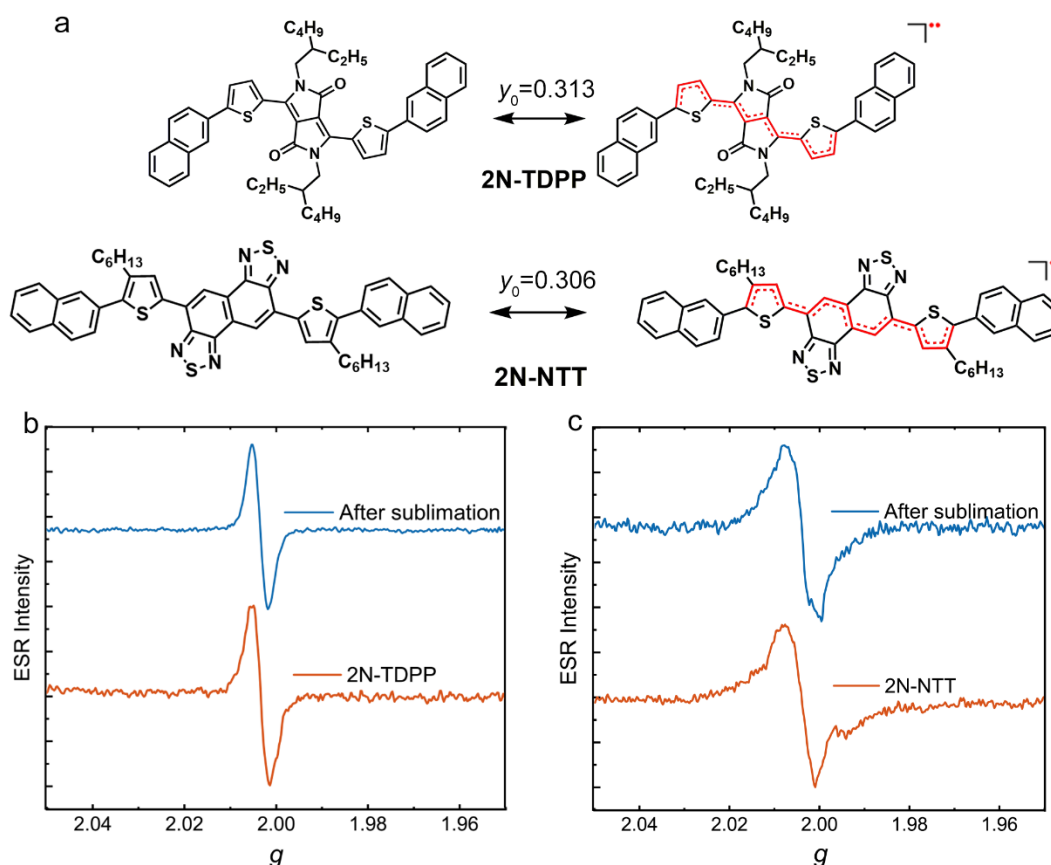

**Supplementary Figure 23.** (a) Resonance structures of 2N-TDPP and 2N-NTT. (b, c) ESR spectra of the small molecules before and after sublimation in an isolated  $N_2$  environment, respectively. The measurements were conducted under the same conditions and using the same molar quantity of each material at 0.02 mmol.

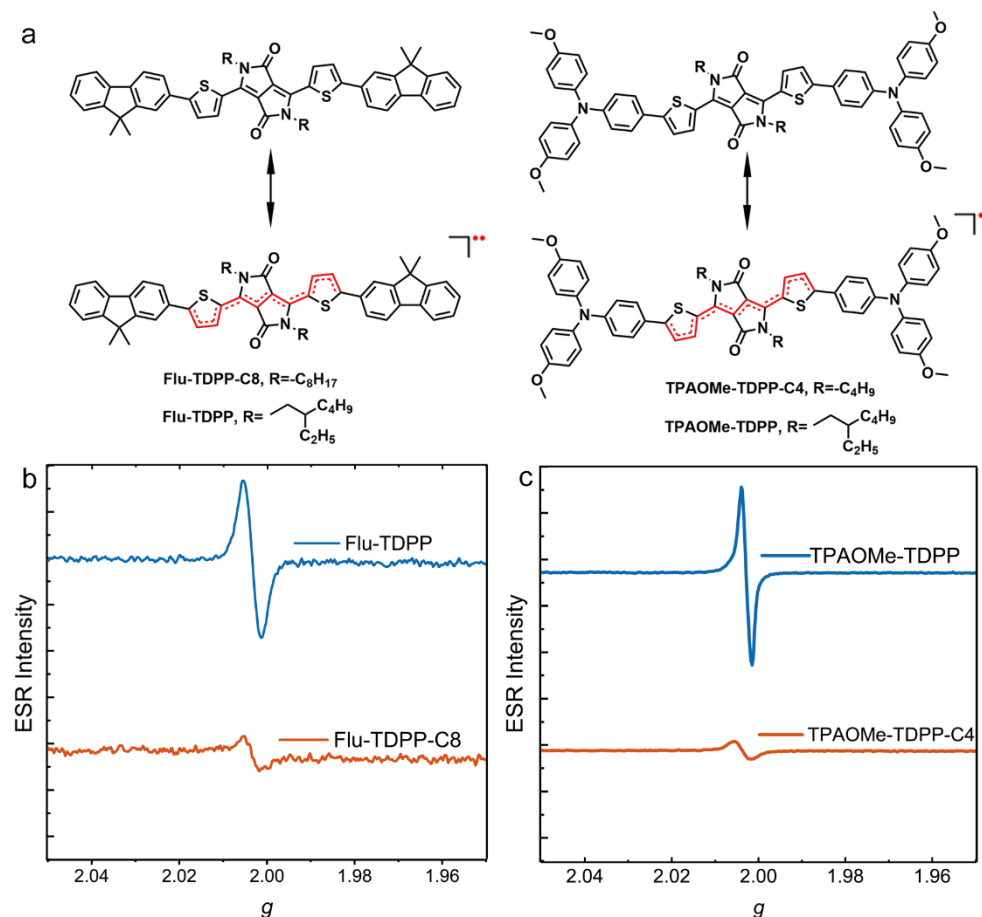

**Supplementary Figure 24.** (a) Resonance structures of Flu-TDPP with *n*-butyl (C8) and 2-ethylhexyl (EH) alkyl chains and TPAOMe-TDPP with *n*-octyl (C4) and EH alkyl chains. (b) ESR spectra of Flu-TDPP and Flu-TDPP-C8. (c) ESR spectra of TPAOMe-TDPP and TPAOMe-TDPP-C4. The measurements were conducted under the same conditions and using the same molar quantity of each material at 0.02 mmol. The DPP molecules with EH side chains show stronger ESR response compared to derivatives with different alkyl chains (C8), (C4).



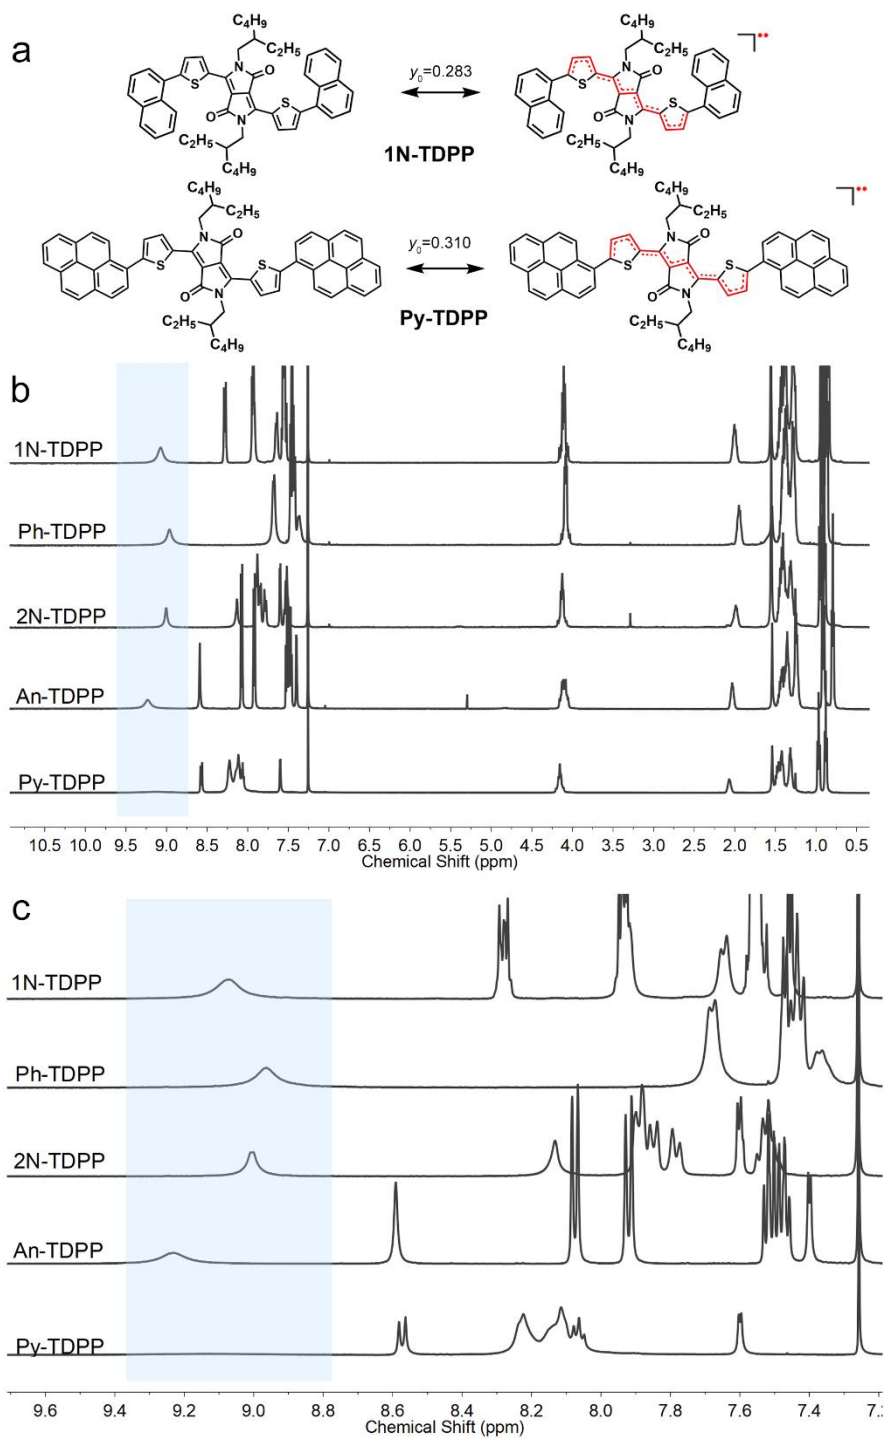

**Supplementary Figure 25.** (a) The resonance structures of 1N-TDPP and Py-TDPP. (b)  $^1\text{H}$  NMR spectra and (c) their enlarged spectra in aromatic areas (7.2 to 9.7 ppm) of the DPP molecules in Chloroform-*d* at room temperature.

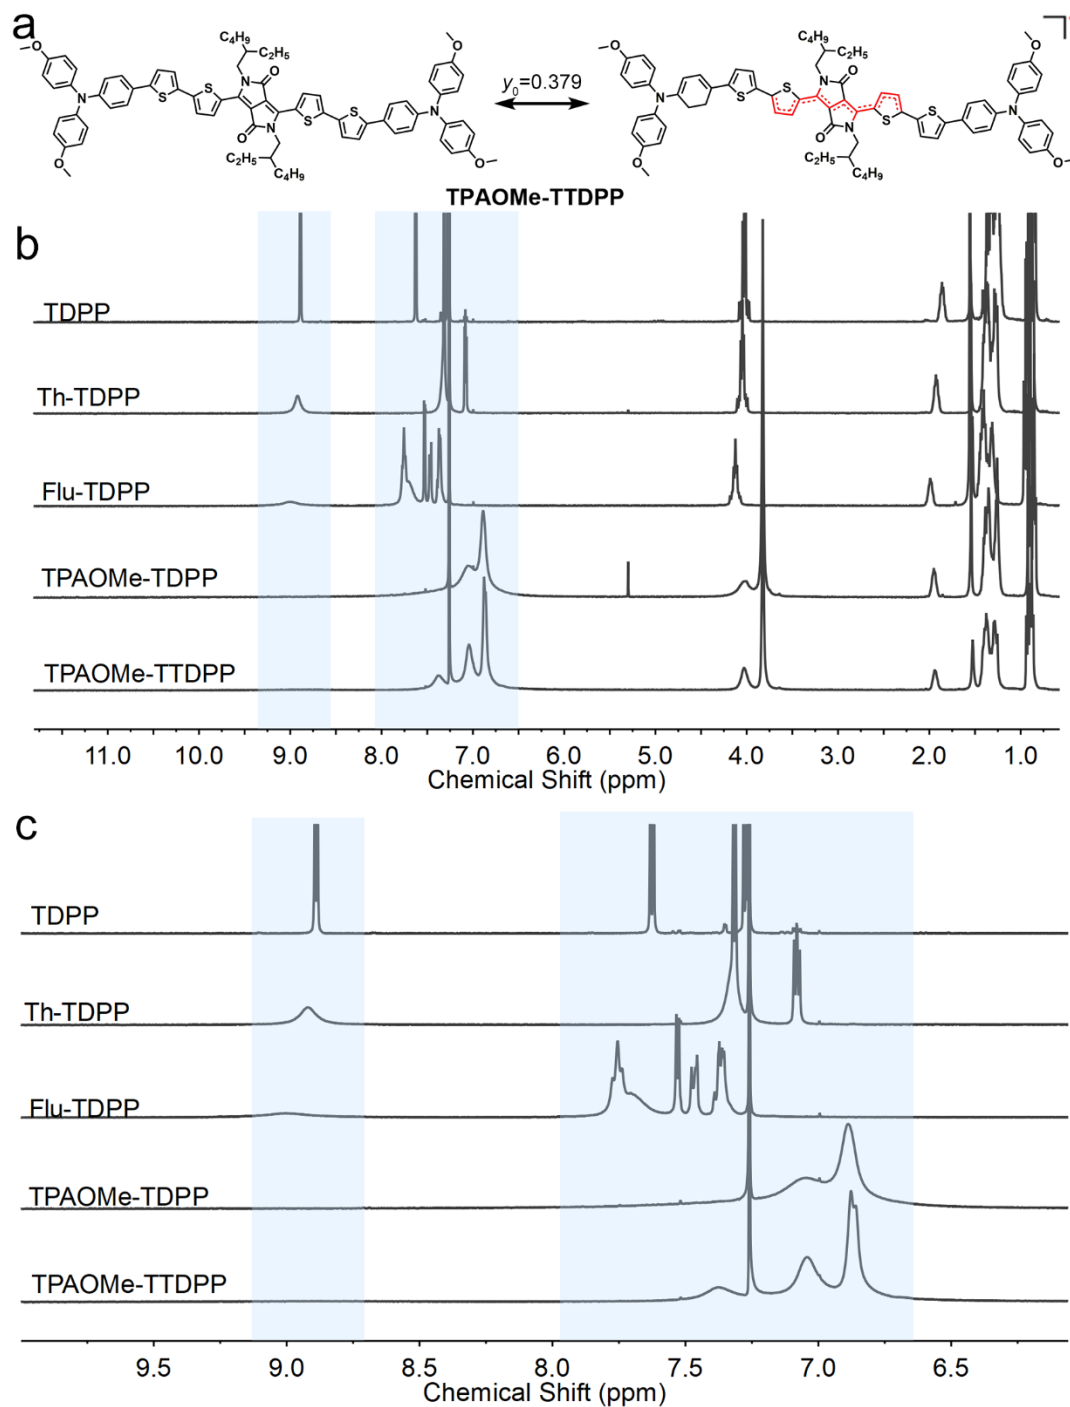

**Supplementary Figure 26.** (a) The resonance structures of TDPP and TPAOMe-TTDP. (b) The  $^1\text{H}$  NMR spectra and (c) their enlarged spectra in aromatic areas (6.0-10.0) of the DPP molecules in Chloroform- $d$  at room temperature.

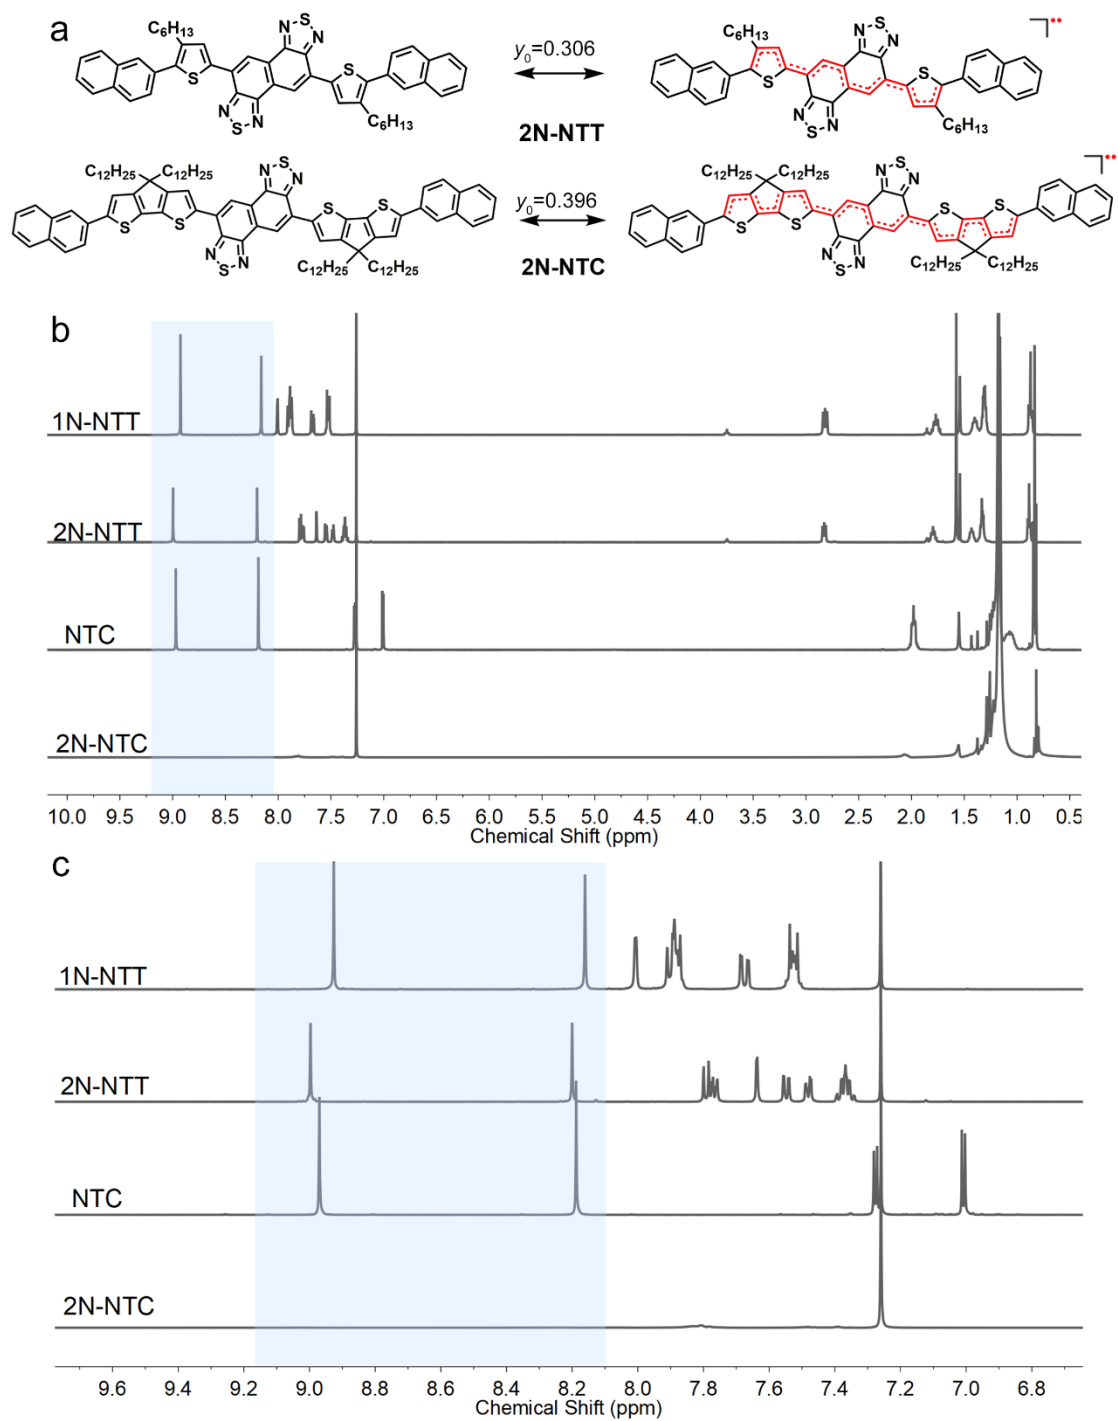

**Supplementary Figure 27.** (a) The resonance structures of 2N-NTT and 2N-NTC. (b) The  $^1\text{H}$  NMR spectra and (c) their enlarged spectra in aromatic areas (6.6-9.8 ppm) of the NT molecules in Chloroform-*d* at room temperature.

## 2.4. X-ray crystallography and packing motifs of the single crystals

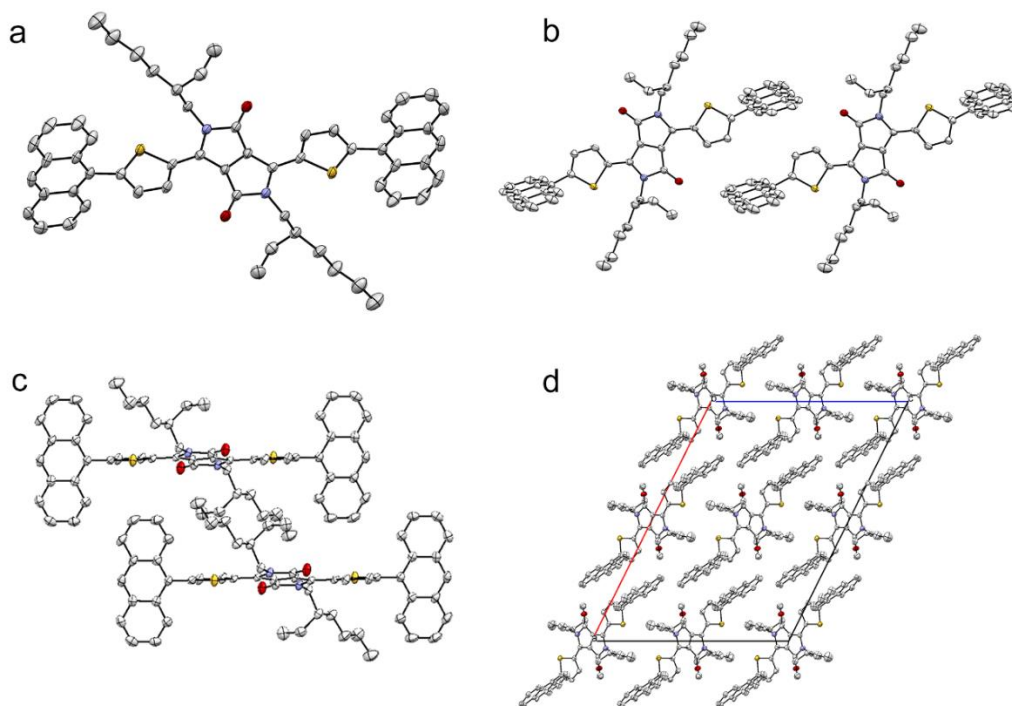

**Supplementary Figure 28.** (a) The ORTEP images of An-TDPP. (b) The top view and (c) side view of two crystal packing structure. (d) The solid-state molecular packing graphs. Hydrogens are omitted for clarity.

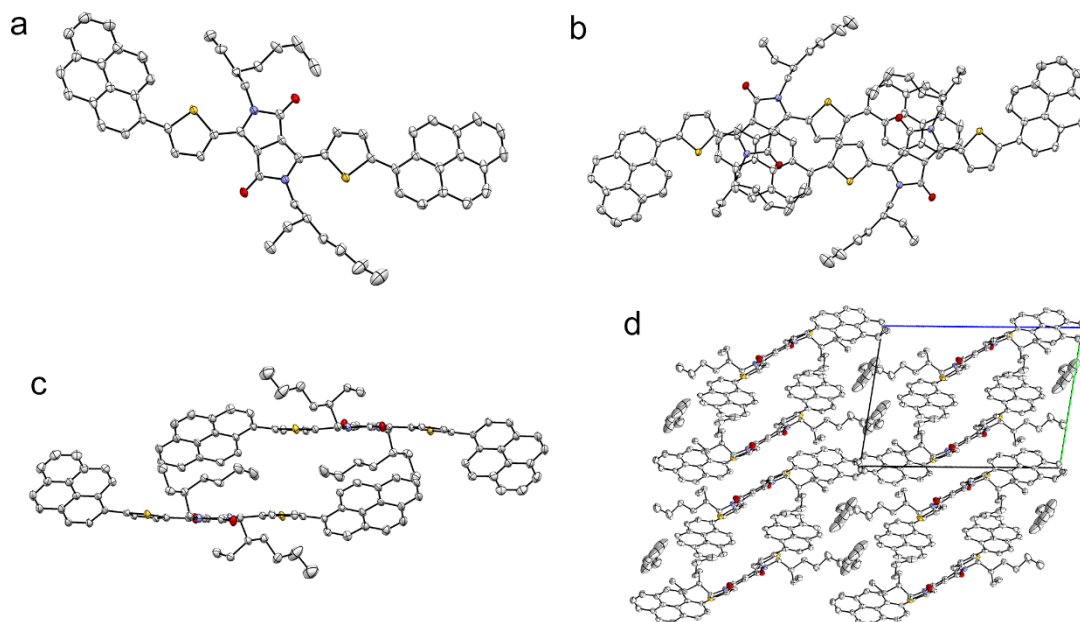

**Supplementary Figure 29.** (a) The ORTEP images of Py-TDPP. (b) The top view and (c) side view of two crystal packing structure. (d) The solid-state molecular packing graphs. Hydrogens are omitted for clarity.

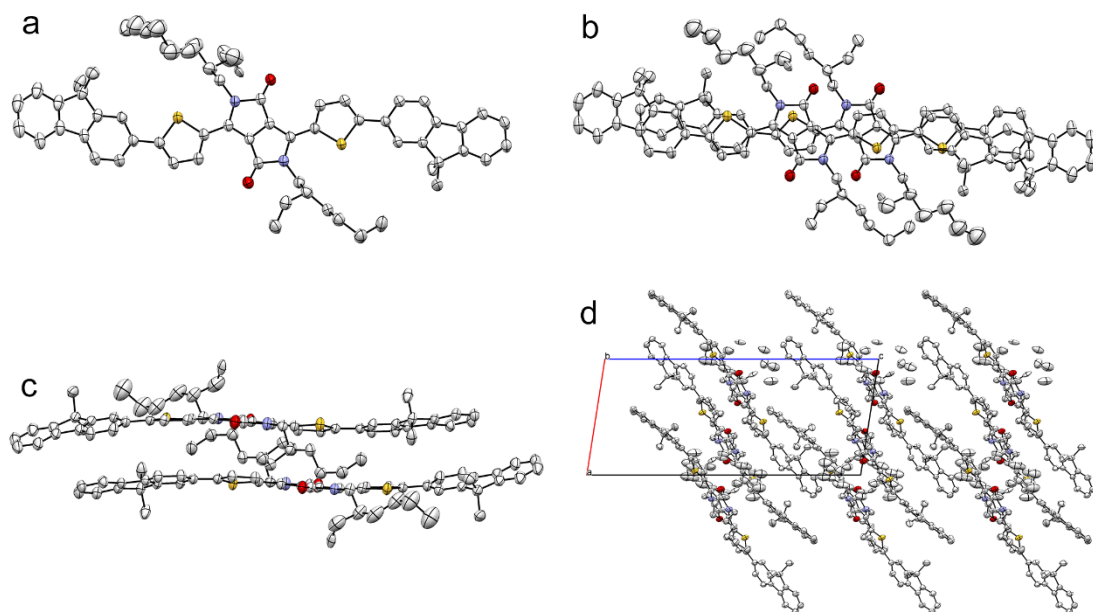

**Supplementary Figure 30.** (a) The ORTEP images of Flu-TDPP. (b) The top view and (c) side view of two crystal packing structure. (d) The solid-state molecular packing graphs. Hydrogens are omitted for clarity.

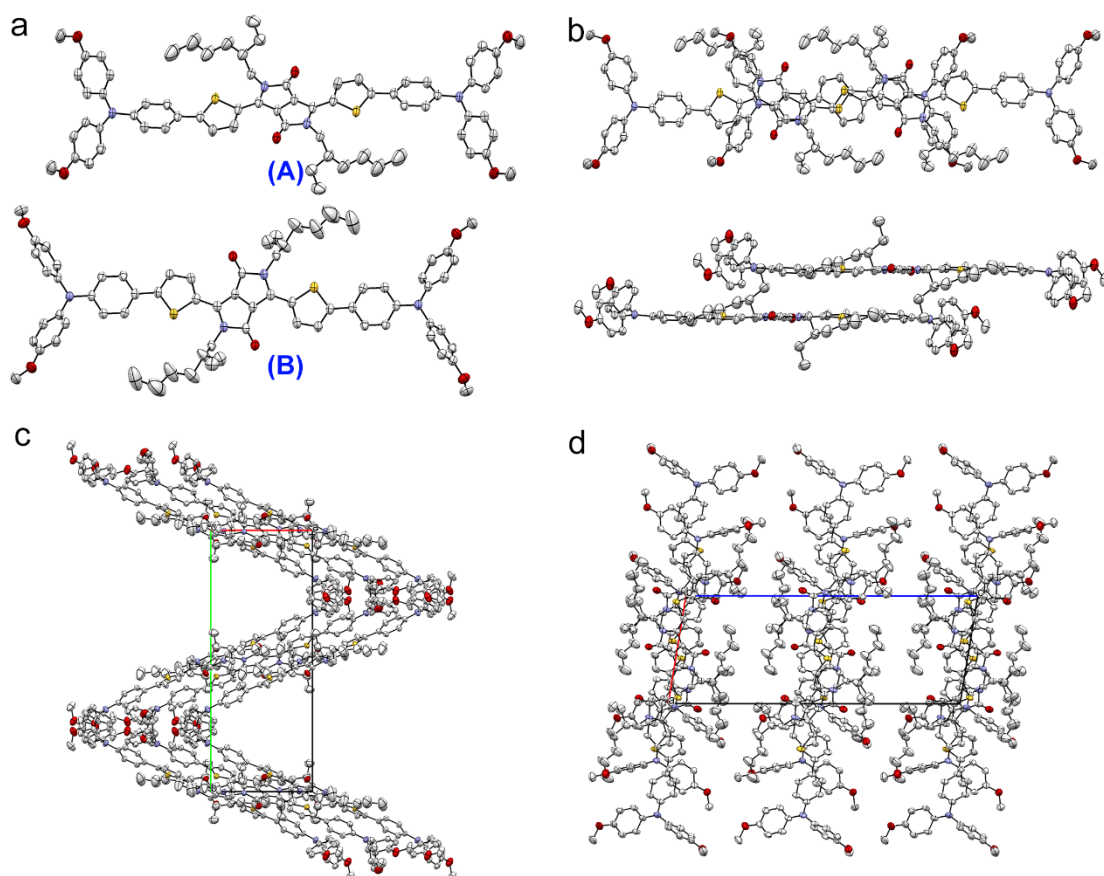

**Supplementary Figure 31.** (a) The ORTEP images of TPAOMe-TDPP. Two conformations were obtained: (A) dimer conformation (B) monomer conformation. (b) The top view and side view of two crystal packing structure. (c), (d) The solid-state molecular packing graphs. Hydrogens are omitted for clarity.

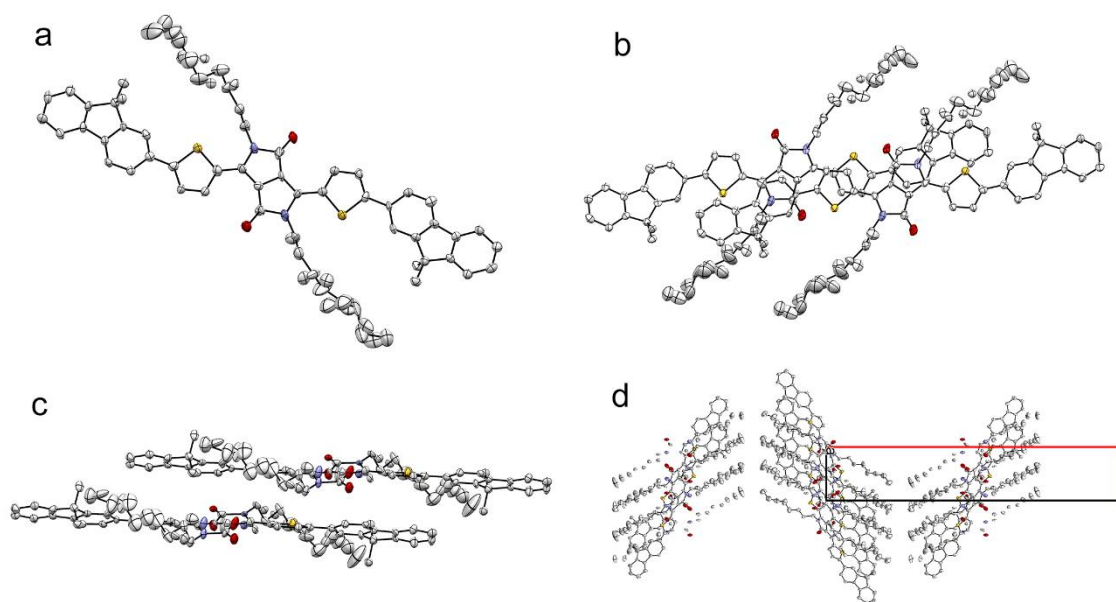

**Supplementary Figure 32.** (a) The ORTEP images of Flu-TDPP-C8. (b) The top view and (c) side view of two crystal packing structure. (d) The solid-state molecular packing graphs. Hydrogens are omitted for clarity.

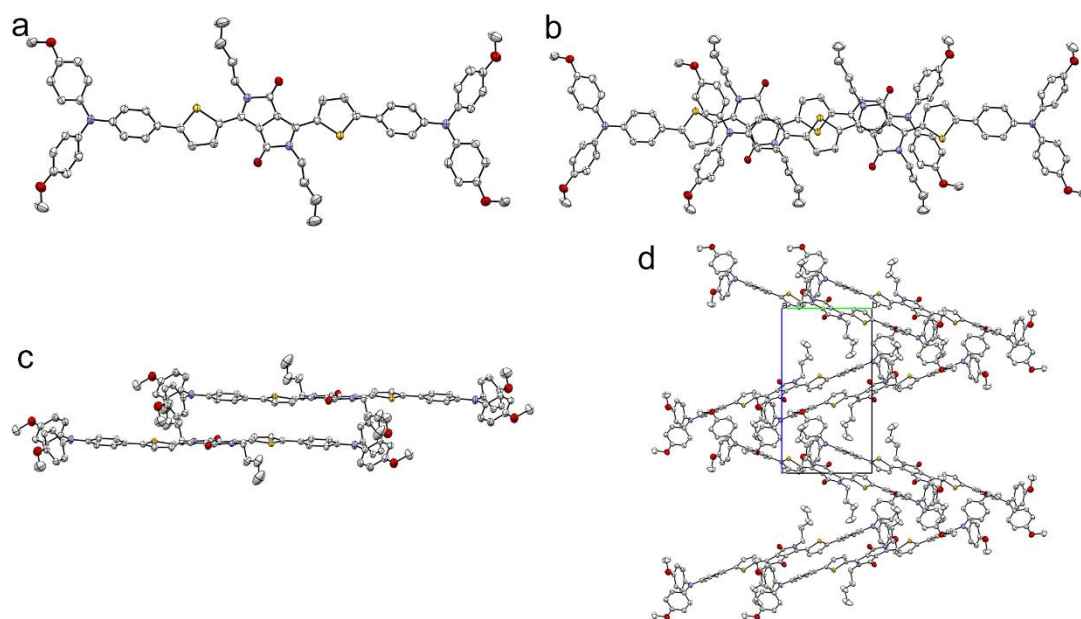

**Supplementary Figure 33.** (a) The ORTEP images of TPAOMe-TDPP-C4. (b) The top view and (c) side view of two crystal packing structure. (d) The solid-state molecular packing graphs. Hydrogens are omitted for clarity.

**Supplementary Table 5.** The two conformations of TPAOMe-TDPP

| Conformation | $a$ (Å) | $b$ (Å) | $c$ (Å) | $d$ (Å) | $e$ (Å) | $f$ (Å) | $g$ (Å) | $\Phi_a$ (°) | $\Phi_B$ (°) |
|--------------|---------|---------|---------|---------|---------|---------|---------|--------------|--------------|
| A            | 1.461   | 1.367   | 1.397   | 1.376   | 1.437   | 1.404   | 1.406   | 5.17         | 14.44        |
| B            | 1.458   | 1.374   | 1.398   | 1.365   | 1.446   | 1.394   | 1.422   | 6.50         | 10.20        |

**Supplementary Table 6.** The critical crystal data of DPP derivatives.
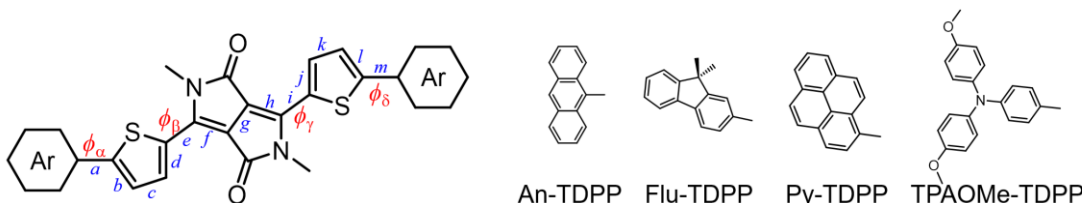

| DPP                  | DFT    |       |       |       | XRD    |           |       |        |       |       |
|----------------------|--------|-------|-------|-------|--------|-----------|-------|--------|-------|-------|
|                      | TPAOMe | Flu   | An    | Py    | TPAOMe | TPAOMe-C4 | Flu   | Flu-C8 | An    | Py    |
| $D$ (Å) / $\phi$ (°) |        |       |       |       |        |           |       |        |       |       |
| $\Phi_\alpha$        | 22.00  | 24.00 | 90.00 | 46.00 | 40.70  | 23.44     | 16.60 | 20.54  | 86.60 | 40.70 |
| $a$                  | 1.459  | 1.463 | 1.484 | 1.469 | 1.461  | 1.465     | 1.464 | 1.472  | 1.475 | 1.469 |
| $b$                  | 1.385  | 1.384 | 1.376 | 1.383 | 1.367  | 1.374     | 1.369 | 1.392  | 1.356 | 1.380 |
| $c$                  | 1.407  | 1.407 | 1.414 | 1.409 | 1.397  | 1.400     | 1.400 | 1.385  | 1.403 | 1.396 |
| $d$                  | 1.391  | 1.391 | 1.388 | 1.390 | 1.376  | 1.380     | 1.372 | 1.381  | 1.371 | 1.385 |
| $e$                  | 1.435  | 1.436 | 1.440 | 1.437 | 1.437  | 1.440     | 1.443 | 1.418  | 1.442 | 1.432 |
| $\Phi_\beta$         | 0.00   | 0.00  | 0.00  | 0.77  | 5.17   | 7.62      | 11.40 | 16.26  | 13.88 | 5.71  |
| $f$                  | 1.398  | 1.397 | 1.395 | 1.397 | 1.404  | 1.394     | 1.384 | 1.380  | 1.388 | 1.387 |
| $g$                  | 1.421  | 1.420 | 1.422 | 1.421 | 1.406  | 1.406     | 1.408 | 1.422  | 1.408 | 1.412 |
| $h$                  | 1.398  | 1.397 | 1.395 | 1.397 | 1.404  | 1.394     | 1.386 | 1.377  | 1.388 | 1.403 |
| $\Phi_\gamma$        | 0.00   | 0.00  | 0.00  | 0.00  | 5.17   | 7.62      | 11.40 | 18.09  | 13.88 | 5.71  |
| $i$                  | 1.435  | 1.436 | 1.440 | 1.438 | 1.437  | 1.440     | 1.443 | 1.439  | 1.442 | 1.431 |
| $j$                  | 1.391  | 1.391 | 1.388 | 1.389 | 1.376  | 1.380     | 1.383 | 1.376  | 1.371 | 1.379 |
| $k$                  | 1.407  | 1.407 | 1.414 | 1.409 | 1.397  | 1.400     | 1.400 | 1.418  | 1.403 | 1.409 |
| $l$                  | 1.385  | 1.384 | 1.376 | 1.382 | 1.367  | 1.374     | 1.373 | 1.381  | 1.356 | 1.379 |
| $m$                  | 1.460  | 1.463 | 1.484 | 1.472 | 1.461  | 1.465     | 1.469 | 1.444  | 1.475 | 1.468 |
| $\Phi_\delta$        | 19.91  | 24.00 | 90.00 | 43.95 | 40.70  | 23.44     | 16.60 | 20.51  | 86.60 | 40.70 |

<sup>a</sup>The data of in the table is one of the two crystal conformations of TPAOMe-TDPP.

## 2.5. X-ray crystallographic data for TPAOMe-TDPP

Supplementary Table 7. Crystal data and structure refinement for TPAOMe-TDPP

| Identification code | TPAOMe-TDPP                                                                  |
|---------------------|------------------------------------------------------------------------------|
| Empirical formula   | C <sub>70</sub> H <sub>74</sub> N <sub>4</sub> O <sub>6</sub> S <sub>2</sub> |
| Formula weight      | 1131.45                                                                      |
| Temperature/K       | 149.99(10)                                                                   |
| Crystal system      | monoclinic                                                                   |
| Space group         | P21/c                                                                        |
| $a/\text{Å}$        | 9.94498(12)                                                                  |
| $b/\text{Å}$        | 25.2472(3)                                                                   |
| $c/\text{Å}$        | 26.5652(3)                                                                   |
| $\omega/^\circ$     | 90                                                                           |

## Supplementary Information

|                                                |                                                             |
|------------------------------------------------|-------------------------------------------------------------|
| $\beta/^\circ$                                 | 99.3209(10)                                                 |
| $\gamma/^\circ$                                | 90                                                          |
| Volume/ $\text{\AA}^3$                         | 6582.00(13)                                                 |
| Z                                              | 4                                                           |
| $\rho_{\text{calc}}/\text{cm}^3$               | 1.142                                                       |
| $\mu/\text{mm}^{-1}$                           | 1.142                                                       |
| F(000)                                         | 2408.0                                                      |
| Crystal size/ $\text{mm}^3$                    | $0.15 \times 0.05 \times 0.03$                              |
| Radiation                                      | CuK $\alpha$ ( $\lambda = 1.54184$ )                        |
| 2 $\Theta$ range for data collection/ $^\circ$ | 4.86 to 134.158                                             |
| Index ranges                                   | $-11 \leq h \leq 9, -30 \leq k \leq 20, -28 \leq l \leq 31$ |
| Reflections collected                          | 33582                                                       |
| Independent reflections                        | 11475 [Rint= 0.0307, Rsigma= 0.0370]                        |
| Data/restraints/parameters                     | 11475/38/747                                                |
| Goodness-of-fit on F <sup>2</sup>              | 1.044                                                       |
| Final R indexes [ $I \geq 2\sigma(I)$ ]        | R1= 0.0672, wR2= 0.1879                                     |
| Final R indexes [all data]                     | R1= 0.0738, wR2= 0.1935                                     |
| Largest diff. peak/hole / e $\text{\AA}^{-3}$  | 1.54/-0.52                                                  |

Supplementary Table 8. Fractional Atomic Coordinates ( $\times 10^4$ ) and Equivalent Isotropic Displacement Parameters ( $\text{\AA}^2 \times 10^3$ ) for TPAOMe-TDPP. U<sub>eq</sub> is defined as 1/3 of the trace of the orthogonalised UJ tensor.

| Atom | x           | y          | z          | U(eq)    |
|------|-------------|------------|------------|----------|
| S01  | 10554.4(6)  | 5591.6(2)  | 4701.8(2)  | 38.32(1) |
| S02  | 5795.6(6)   | 5640.0(3)  | 205.2(3)   | 44.77(1) |
| O003 | 14735.7(18) | 4444.5(7)  | 4011.8(7)  | 43.9(4)  |
| O004 | 10499(2)    | 4526.9(8)  | 1031.6(8)  | 49.9(5)  |
| O005 | -3473(2)    | 7700.9(10) | -1990.6(8) | 63.9(6)  |
| N006 | 4731(2)     | 6830.9(9)  | 5088.7(8)  | 39.7(5)  |
| O007 | 1804(2)     | 7319.2(10) | 3171.8(8)  | 62.7(6)  |
| N008 | 13264(2)    | 4945.2(8)  | 4414.1(8)  | 36.3(5)  |
| N009 | -320(2)     | 6852.1(9)  | -248.7(9)  | 43.5(5)  |
| O00A | -1346(2)    | 7439.5(11) | 1673.0(8)  | 70.5(7)  |
| N00B | 8727(2)     | 5015.5(9)  | 573.8(9)   | 43.1(5)  |
| O00C | 3494(3)     | 7987.7(10) | 6745.9(9)  | 66.7(6)  |



## Supplementary Information

---

|      |          |            |            |         |
|------|----------|------------|------------|---------|
| C00D | 8632(2)  | 6130.3(9)  | 5168.3(10) | 36.4(5) |
| C00E | 14538(3) | 4707.6(10) | 4382.6(10) | 37.6(5) |
| C00F | -608(3)  | 6999.3(10) | 240.9(10)  | 40.2(6) |
| C00G | 14601(2) | 5151.1(9)  | 5147.0(10) | 36.6(5) |
| C00H | 2766(3)  | 6029.1(10) | 87.9(11)   | 39.9(6) |
| C00I | 10002(3) | 5911.7(10) | 5205.5(10) | 37.9(5) |
| C00J | 7588(3)  | 6026.6(10) | 4756.7(10) | 38.0(5) |
| C00K | 4390(2)  | 7114.4(10) | 5516.4(10) | 36.5(5) |
| C00L | 13285(2) | 5204.2(9)  | 4876.0(10) | 36.4(5) |
| C00M | 3954(3)  | 6949.3(10) | 4597.1(10) | 38.3(5) |
| C00N | 3478(3)  | 6129.1(10) | -313.3(11) | 41.2(6) |
| C00O | 10024(3) | 4762.6(10) | 637.5(12)  | 44.0(6) |
| C00P | 918(3)   | 6599.4(10) | -284.7(11) | 40.2(6) |
| C00Q | 8306(3)  | 6455.4(10) | 5556.6(10) | 40.4(6) |
| C00R | -1129(3) | 7082.9(10) | -687.6(10) | 39.8(6) |
| C00S | 9499(3)  | 5141.9(10) | -163.1(11) | 42.0(6) |
| C00T | 6010(2)  | 6588.5(9)  | 5117.3(10) | 35.6(5) |
| C00U | 349(3)   | 7276.4(11) | 583.1(11)  | 44.5(6) |
| C00V | 2597(3)  | 6814.1(10) | 4486.6(10) | 41.1(6) |
| C00W | 6305(3)  | 6249.5(10) | 4734.5(10) | 38.7(5) |
| C00X | 12227(3) | 5674.5(11) | 5530.3(11) | 44.9(6) |
| C00Y | 1596(3)  | 6685.2(11) | -694.7(11) | 43.2(6) |
| C00Z | 1506(3)  | 6255.5(10) | 103.3(11)  | 41.3(6) |
| C010 | 2449(3)  | 7186.6(12) | 3651.7(10) | 47.6(7) |
| C011 | 2847(3)  | 6457.6(11) | -707.8(11) | 44.9(6) |
| C012 | 8388(3)  | 5232.9(10) | 90.9(11)   | 42.5(6) |
| C013 | 11030(3) | 5921.9(11) | 5618.8(11) | 45.0(6) |
| C014 | 4254(3)  | 7665.2(10) | 5497.7(10) | 40.8(6) |
| C015 | -1482(3) | 7615.6(11) | -693.9(11) | 43.0(6) |
| C016 | 7039(3)  | 6675.6(10) | 5536.6(11) | 40.7(6) |
| C017 | 4833(3)  | 5913.2(10) | -330.3(11) | 44.1(6) |
| C018 | 3951(3)  | 7937.3(11) | 5914.2(11) | 47.6(7) |

## Supplementary Information

---

|      |          |            |             |          |
|------|----------|------------|-------------|----------|
| C019 | -1851(3) | 6874.8(11) | 379.1(11)   | 44.8(6)  |
| C01A | 1829(3)  | 6933.8(11) | 4014.7(11)  | 44.3(6)  |
| C01B | 4199(3)  | 6854.6(11) | 5955.5(11)  | 43.3(6)  |
| C01C | 12110(3) | 4858.0(11) | 4004.8(11)  | 42.2(6)  |
| C01D | 12158(3) | 5469.9(10) | 5051.2(10)  | 38.0(5)  |
| C01E | -1567(3) | 6775.5(12) | -1117.7(11) | 48.7(7)  |
| C01F | 4556(3)  | 7216.7(11) | 4233.2(10)  | 43.0(6)  |
| C01G | 72(3)    | 7411.1(12) | 1055.9(11)  | 49.7(7)  |
| C01H | 3890(3)  | 7126.9(12) | 6374.8(11)  | 47.6(6)  |
| C01I | -2274(3) | 7833.2(12) | -1122.9(11) | 48.0(7)  |
| C01J | -1175(3) | 7281.9(12) | 1193.2(11)  | 50.3(7)  |
| C01K | 3806(3)  | 7329.1(12) | 3759.1(11)  | 48.5(7)  |
| C01L | -2696(3) | 7525.1(13) | -1547.1(11) | 48.7(7)  |
| C01M | -2142(3) | 7015.6(11) | 854.1(12)   | 48.0(7)  |
| C01N | 7130(3)  | 5489.1(10) | -116.4(12)  | 44.4(6)  |
| C01O | 3771(3)  | 7675.1(12) | 6355.0(11)  | 47.1(6)  |
| C01P | 7900(3)  | 4983.9(11) | 979.7(12)   | 47.7(6)  |
| C01Q | -2344(3) | 6988.9(13) | -1542.9(12) | 51.2(7)  |
| C01R | 6812(3)  | 5656.1(13) | -614.5(13)  | 56.1(8)  |
| C01S | 5531(3)  | 5894.0(13) | -733.1(13)  | 56.6(8)  |
| C01T | 11930(4) | 5291(2)    | 3590.9(14)  | 80.2(12) |
| C01U | 8009(4)  | 5469.7(15) | 1330.6(14)  | 65.2(9)  |
| C01V | 426(3)   | 7149.3(19) | 3021.2(13)  | 74.8(11) |
| C01W | 3193(4)  | 7736.6(18) | 7189.7(13)  | 76.9(11) |
| C01X | -3711(4) | 8256.1(17) | -2032.6(15) | 78.3(11) |
| C01Y | 13043(4) | 5930.7(15) | 3062.2(15)  | 72.0(10) |
| C01Z | -2637(4) | 7311(2)    | 1824.3(15)  | 82.1(12) |
| C020 | 9459(4)  | 5564.6(16) | 1597.2(16)  | 76.8(11) |
| C021 | 13149(4) | 5431.8(17) | 3375.4(16)  | 75.7(10) |
| C022 | 10701(4) | 5129(2)    | 3184.7(16)  | 98.5(16) |
| C023 | 7010(5)  | 5411(2)    | 1707.1(18)  | 90.3(13) |
| C024 | 9698(5)  | 6080.9(16) | 1893.1(17)  | 86.4(12) |

## Supplementary Information

|      |         |         |         |           |
|------|---------|---------|---------|-----------|
| C025 | 5567(5) | 5469(2) | 1506(2) | 102.6(16) |
| C026 | 9340(4) | 5182(3) | 3345(2) | 121(2)    |
| C028 | 4622(6) | 5397(3) | 1895(2) | 128(2)    |
| C02A | 3118(6) | 5482(3) | 1674(3) | 145(3)    |
| C1   | 6862(6) | 5280(3) | 3286(3) | 150(3)    |
| C0AA | 8090(6) | 5092(4) | 3045(3) | 167(3)    |

**Supplementary Table 9.** Anisotropic Displacement Parameters ( $\text{\AA}^2 \times 10^3$ ) for TPAOMe-TDPP. The Anisotropic displacement factor exponent takes the form:  $-2\pi^2[h^2a^{*2}U_{11}+2hka^*b^*U_{12}+\dots]$ .

| Atom | $U_{11}$ | $U_{22}$  | $U_{33}$ | $U_{23}$  | $U_{13}$ | $U_{12}$ |
|------|----------|-----------|----------|-----------|----------|----------|
| S01  | 31.5(3)  | 36.3(3)   | 48.6(4)  | 5.0(3)    | 10.9(3)  | 5.9(2)   |
| S02  | 31.1(3)  | 41.7(4)   | 62.9(4)  | -6.5(3)   | 11.7(3)  | 7.3(2)   |
| O003 | 37.5(10) | 42.3(10)  | 52.5(11) | -1.7(8)   | 9.0(8)   | 5.1(8)   |
| O004 | 41.6(11) | 45.3(11)  | 64.6(13) | -0.1(9)   | 13.6(9)  | 11.4(8)  |
| O005 | 57.1(13) | 81.3(16)  | 54.2(12) | 13.8(11)  | 12.0(10) | 22.5(11) |
| N006 | 33.4(11) | 42.0(12)  | 44.7(12) | 2.4(9)    | 9.2(9)   | 9.6(9)   |
| O007 | 47.1(12) | 94.5(18)  | 45.9(11) | 9.2(11)   | 5.5(9)   | 11.1(11) |
| N008 | 27.4(10) | 34.5(11)  | 47.8(12) | 4.3(9)    | 8.5(8)   | 2.7(8)   |
| N009 | 33.2(12) | 46.7(13)  | 51.5(13) | -2.1(10)  | 9.1(9)   | 13.4(9)  |
| O00A | 57.5(14) | 105.4(19) | 51.8(12) | 0.1(12)   | 19.1(10) | 26.7(13) |
| N00B | 30.8(11) | 37.9(11)  | 62.9(14) | -5.2(10)  | 14.2(10) | 5.3(9)   |
| O00C | 77.7(16) | 69.1(15)  | 54.8(13) | -16.0(11) | 15.2(11) | 10.7(12) |
| C00D | 31.1(13) | 30.0(12)  | 49.9(14) | 5.2(10)   | 12.0(10) | -0.4(9)  |
| C00E | 33.5(13) | 31.3(12)  | 49.3(14) | 6.4(11)   | 11.0(11) | 2.9(10)  |
| C00F | 32.5(13) | 38.0(13)  | 51.4(15) | 1.7(11)   | 11.0(11) | 10.0(10) |
| C00G | 32.5(13) | 31.6(12)  | 47.6(14) | 5.8(10)   | 12.1(10) | 3.9(10)  |
| C00H | 34.4(13) | 31.5(12)  | 54.2(15) | -3.2(11)  | 7.9(11)  | 2.8(10)  |
| C00I | 32.4(13) | 31.9(12)  | 51.2(14) | 5.5(11)   | 12.0(11) | 1.9(10)  |
| C00J | 36.4(14) | 32.6(12)  | 47.2(14) | 0.8(10)   | 13.6(11) | 1.3(10)  |
| C00K | 26.8(12) | 37.3(13)  | 46.3(14) | -0.1(11)  | 8.7(10)  | 2.8(10)  |
| C00L | 32.1(13) | 29.1(12)  | 49.4(14) | 7.5(10)   | 11.1(10) | 0.3(9)   |
| C00M | 34.5(13) | 35.6(13)  | 45.4(14) | 2.7(11)   | 8.4(10)  | 9.0(10)  |
| C00N | 31.6(13) | 32.4(13)  | 60.7(16) | -6.6(11)  | 10.8(11) | 3.1(10)  |
| C00O | 32.3(14) | 33.8(13)  | 66.9(18) | -7.6(12)  | 11.0(12) | 5.5(10)  |
| C00P | 31.0(13) | 35.0(13)  | 55.1(15) | -4.9(11)  | 8.3(11)  | 4.5(10)  |
| C00Q | 32.8(13) | 36.5(13)  | 51.5(15) | -3.0(11)  | 5.8(11)  | -0.5(10) |
| C00R | 27.8(13) | 42.5(14)  | 50.2(15) | -2.1(11)  | 9.8(10)  | 6.3(10)  |
| C00S | 29.8(13) | 34.2(13)  | 63.6(17) | -4.8(12)  | 12.2(11) | 6.0(10)  |
| C00T | 29.5(12) | 31.0(12)  | 48.4(14) | 3.7(10)   | 12.2(10) | 1.3(9)   |

## Supplementary Information

---

|      |          |          |          |           |          |          |
|------|----------|----------|----------|-----------|----------|----------|
| C00U | 33.4(14) | 46.2(15) | 55.1(16) | 1.2(12)   | 11.3(11) | 6.7(11)  |
| C00V | 37.1(14) | 38.5(14) | 49.9(15) | 2.2(11)   | 13.8(11) | 3.2(11)  |
| C00W | 34.1(13) | 37.5(13) | 45.0(14) | 1.5(11)   | 7.3(10)  | 1.1(10)  |
| C00X | 33.0(14) | 45.5(15) | 55.8(16) | 2.7(12)   | 6.0(11)  | 6.3(11)  |
| C00Y | 35.9(14) | 40.1(14) | 54.4(16) | 2.2(12)   | 9.9(11)  | 5.7(11)  |
| C00Z | 33.4(13) | 38.4(14) | 53.1(15) | -1.7(11)  | 10.3(11) | 2.8(10)  |
| C010 | 45.5(16) | 55.3(17) | 42.4(14) | 2.1(12)   | 8.5(12)  | 14.2(13) |
| C011 | 37.4(14) | 42.5(14) | 56.7(16) | -2.2(12)  | 13.6(12) | 4.1(11)  |
| C012 | 31.2(13) | 31.2(13) | 66.7(18) | -8.6(12)  | 13.0(12) | 0.8(10)  |
| C013 | 34.5(14) | 49.3(16) | 51.9(15) | -3.2(12)  | 9.1(11)  | 6.9(11)  |
| C014 | 35.4(14) | 38.6(14) | 48.4(14) | 3.3(11)   | 6.2(11)  | 3.1(10)  |
| C015 | 36.8(14) | 44.1(15) | 50.6(15) | -4.5(12)  | 14.3(11) | 7.1(11)  |
| C016 | 35.4(14) | 36.1(13) | 51.5(15) | -4.6(11)  | 9.7(11)  | 0.6(10)  |
| C017 | 32.3(14) | 35.5(13) | 65.1(17) | -6.2(12)  | 9.9(12)  | 4.2(10)  |
| C018 | 45.8(16) | 39.0(14) | 56.1(16) | -3.8(12)  | 2.2(12)  | 7.0(11)  |
| C019 | 33.9(14) | 40.5(14) | 60.5(17) | 4.8(12)   | 9.4(12)  | 4.6(11)  |
| C01A | 30.9(13) | 50.3(15) | 52.5(15) | -0.9(12)  | 8.6(11)  | 4.6(11)  |
| C01B | 40.1(15) | 37.9(14) | 52.7(15) | 3.0(12)   | 9.9(11)  | 1.4(11)  |
| C01C | 31.3(13) | 42.3(14) | 53.2(15) | -1.8(12)  | 7.6(11)  | -1.5(11) |
| C01D | 36.8(14) | 29.6(12) | 49.3(14) | 5.9(10)   | 12.2(11) | 2.4(10)  |
| C01E | 44.5(16) | 42.1(15) | 60.2(17) | -3.7(13)  | 11.1(13) | 4.0(12)  |
| C01F | 33.2(14) | 46.4(15) | 51.5(15) | 2.3(12)   | 13.4(11) | 3.5(11)  |
| C01G | 40.9(16) | 54.3(17) | 53.4(16) | -4.3(13)  | 5.7(12)  | 9.6(12)  |
| C01H | 43.1(15) | 56.2(17) | 45.0(15) | 3.3(13)   | 12.1(12) | -2.9(12) |
| C01I | 45.6(16) | 47.7(15) | 54.9(16) | 5.3(13)   | 20.8(13) | 16.5(12) |
| C01J | 47.6(17) | 58.1(18) | 48.3(15) | 7.6(13)   | 16.7(13) | 20.3(13) |
| C01K | 44.5(16) | 53.4(17) | 50.2(16) | 9.1(13)   | 15.8(12) | 8.4(12)  |
| C01L | 35.5(15) | 63.3(18) | 50.0(16) | 7.2(13)   | 14.8(12) | 11.3(12) |
| C01M | 36.6(15) | 49.1(16) | 61.3(17) | 11.8(13)  | 16.9(12) | 10.5(12) |
| C01N | 33.3(14) | 33.6(13) | 68.2(18) | -8.7(12)  | 13.7(12) | 3.5(10)  |
| C01O | 40.5(15) | 51.5(16) | 48.7(15) | -10.4(13) | 5.4(12)  | 6.3(12)  |
| C01P | 38.3(15) | 44.8(15) | 62.6(17) | -5.0(13)  | 16.4(12) | 5.0(11)  |
| C01Q | 41.5(16) | 57.9(18) | 54.3(17) | -6.7(14)  | 8.1(12)  | 2.6(13)  |
| C01R | 44.7(17) | 59.1(19) | 69(2)    | 0.5(15)   | 21.5(14) | 13.5(13) |
| C01S | 43.2(17) | 65(2)    | 64.6(19) | 4.7(15)   | 16.8(14) | 18.1(14) |
| C01T | 51(2)    | 120(3)   | 65(2)    | 35(2)     | -5.3(16) | -25(2)   |
| C01U | 62(2)    | 64(2)    | 73(2)    | -13.1(17) | 22.2(17) | 5.5(16)  |
| C01V | 48(2)    | 120(3)   | 54.4(19) | 4(2)      | 2.8(15)  | 19(2)    |
| C01W | 88(3)    | 93(3)    | 52.8(19) | -13.7(19) | 18.4(18) | 7(2)     |
| C01X | 81(3)    | 88(3)    | 69(2)    | 24(2)     | 21.4(19) | 38(2)    |

## Supplementary Information

|             |        |        |           |           |          |
|-------------|--------|--------|-----------|-----------|----------|
| C01Y 83(3)  | 63(2)  | 71(2)  | 13.8(18)  | 15.8(19)  | -5.3(18) |
| C01Z 68(2)  | 119(3) | 68(2)  | 15(2)     | 36.9(19)  | 30(2)    |
| C020 78(3)  | 69(2)  | 80(2)  | -16.3(19) | 3(2)      | 11.5(19) |
| C021 68(2)  | 82(3)  | 78(2)  | 15(2)     | 15.1(19)  | -0.4(19) |
| C022 62(2)  | 147(4) | 78(3)  | 41(3)     | -12.0(19) | -26(2)   |
| C023 88(3)  | 99(3)  | 95(3)  | -20(3)    | 47(2)     | 6(2)     |
| C024 106(3) | 63(2)  | 83(3)  | -9(2)     | -6(2)     | 2(2)     |
| C025 88(3)  | 104(4) | 129(4) | -29(3)    | 58(3)     | -9(3)    |
| C026 68(3)  | 162(5) | 128(4) | 79(4)     | 1(2)      | -5(3)    |
| C028 103(4) | 149(5) | 151(5) | -30(4)    | 75(4)     | -1(4)    |
| C02A 93(4)  | 186(7) | 172(6) | -72(5)    | 68(4)     | -25(4)   |
| C1 75(3)    | 192(7) | 188(6) | 108(5)    | 34(4)     | 25(4)    |
| C0AA 96(3)  | 254(8) | 143(5) | 11(5)     | -8(3)     | -27(4)   |

**Supplementary Table 10.** Bond Lengths for TPAOMe-TDPP.

| tom  | Atom | Length/Å | Atom Atom  | Length/Å |
|------|------|----------|------------|----------|
| S01  | C00I | 1.728(3) | C00P C00Y  | 1.388(4) |
| S01  | C01D | 1.738(3) | C00P C00Z  | 1.401(4) |
| S02  | C017 | 1.725(3) | C00Q C016  | 1.370(4) |
| S02  | C01N | 1.733(3) | C00R C015  | 1.390(4) |
| O003 | C00E | 1.230(3) | C00R C01E  | 1.392(4) |
| O004 | C00O | 1.230(4) | C00S C00S2 | 1.406(5) |
| O005 | C01L | 1.374(3) | C00S C012  | 1.404(4) |
| O005 | C01X | 1.423(5) | C00T C00W  | 1.396(4) |
| N006 | C00K | 1.429(3) | C00T C016  | 1.402(4) |
| N006 | C00M | 1.437(3) | C00U C01G  | 1.372(4) |
| N006 | C00T | 1.403(3) | C00V C01A  | 1.392(4) |
| O007 | C010 | 1.372(3) | C00X C013  | 1.398(4) |
| O007 | C01V | 1.430(4) | C00X C01D  | 1.365(4) |
| N008 | C00E | 1.417(3) | C00Y C011  | 1.376(4) |
| N008 | C00L | 1.388(3) | C010 C01A  | 1.382(4) |
| N008 | C01C | 1.464(3) | C010 C01K  | 1.382(4) |
| N009 | C00F | 1.426(3) | C012 C01N  | 1.436(4) |
| N009 | C00P | 1.403(3) | C014 C018  | 1.377(4) |
| N009 | C00R | 1.429(3) | C015 C01I  | 1.389(4) |
| O00A | C01J | 1.372(4) | C017 C01S  | 1.368(4) |
| O00A | C01Z | 1.443(4) | C018 C01O  | 1.382(4) |
| N00B | C00O | 1.425(3) | C019 C01M  | 1.386(4) |
| N00B | C012 | 1.386(4) | C01B C01H  | 1.385(4) |
| N00B | C01P | 1.460(4) | C01C C01T  | 1.540(5) |

## Supplementary Information

|            |          |           |          |
|------------|----------|-----------|----------|
| O00C C01O  | 1.368(3) | C01E C01Q | 1.371(4) |
| O00C C01W  | 1.413(4) | C01F C01K | 1.385(4) |
| C00D C00I  | 1.458(3) | C01G C01J | 1.386(4) |
| C00D C00J  | 1.405(4) | C01H C01O | 1.389(4) |
| C00D C00Q  | 1.397(4) | C01I C01L | 1.378(4) |
| C00E C00G1 | 1.441(4) | C01J C01M | 1.381(4) |
| C00F C00U  | 1.394(4) | C01L C01Q | 1.398(4) |
| C00F C019  | 1.381(4) | C01N C01R | 1.376(4) |
| C00G C00G1 | 1.422(5) | C01P C01U | 1.534(4) |
| C00G C00L  | 1.394(4) | C01R C01S | 1.397(4) |
| C00H C00N  | 1.395(4) | C01T C021 | 1.466(5) |
| C00H C00Z  | 1.384(4) | C01T C022 | 1.549(5) |
| C00I C013  | 1.374(4) | C01U C020 | 1.519(5) |
| C00J C00W  | 1.388(4) | C01U C023 | 1.527(5) |
| C00K C014  | 1.397(4) | C01Y C021 | 1.504(5) |
| C00K C01B  | 1.378(4) | C020 C024 | 1.521(5) |
| C00L C01D  | 1.446(3) | C022 C026 | 1.491(6) |
| C00M C00V  | 1.376(4) | C023 C025 | 1.456(7) |
| C00M C01F  | 1.392(4) | C025 C028 | 1.516(6) |
| C00N C011  | 1.403(4) | C026 C0AA | 1.382(7) |
| C00N C017  | 1.461(4) | C028 C02A | 1.531(8) |
| C00O C00S2 | 1.437(4) | C1 C0AA   | 1.542(8) |

**Supplementary Table 11.** Bond Angles for TPAOMe-TDPP.

| Atom | Atom | Atom | Angle/°    | Atom | Atom | Atom | Angle/°  |
|------|------|------|------------|------|------|------|----------|
| C00I | S01  | C01D | 92.78(12)  | C00M | C00V | C01A | 121.0(3) |
| C017 | S02  | C01N | 92.79(14)  | C00J | C00W | C00T | 121.2(2) |
| C01L | O005 | C01X | 116.7(3)   | C01D | C00X | C013 | 114.3(3) |
| C00K | N006 | C00M | 117.15(19) | C011 | C00Y | C00P | 120.7(3) |
| C00T | N006 | C00K | 120.3(2)   | C00H | C00Z | C00P | 120.4(3) |
| C00T | N006 | C00M | 119.3(2)   | O007 | C010 | C01A | 124.5(3) |
| C010 | O007 | C01V | 118.0(3)   | O007 | C010 | C01K | 115.0(3) |
| C00E | N008 | C01C | 119.6(2)   | C01K | C010 | C01A | 120.5(3) |
| C00L | N008 | C00E | 111.5(2)   | C00Y | C011 | C00N | 121.7(3) |
| C00L | N008 | C01C | 128.7(2)   | N00B | C012 | C00S | 106.7(2) |
| C00F | N009 | C00R | 117.9(2)   | N00B | C012 | C01N | 126.8(2) |
| C00P | N009 | C00F | 119.3(2)   | C00S | C012 | C01N | 126.4(3) |
| C00P | N009 | C00R | 120.9(2)   | C00I | C013 | C00X | 113.6(3) |
| C01J | O00A | C01Z | 116.3(3)   | C018 | C014 | C00K | 120.0(3) |
| C00O | N00B | C01P | 119.7(2)   | C01I | C015 | C00R | 120.1(3) |

## Supplementary Information

---

|       |      |       |            |      |      |      |            |
|-------|------|-------|------------|------|------|------|------------|
| C012  | N00B | C00O  | 111.5(2)   | C00Q | C016 | C00T | 121.0(2)   |
| C012  | N00B | C01P  | 128.6(2)   | C00N | C017 | S02  | 121.0(2)   |
| C01O  | O00C | C01W  | 118.1(3)   | C01S | C017 | S02  | 110.3(2)   |
| C00J  | C00D | C00I  | 123.1(2)   | C01S | C017 | C00N | 128.7(3)   |
| C00Q  | C00D | C00I  | 119.9(2)   | C014 | C018 | C01O | 121.1(3)   |
| C00Q  | C00D | C00J  | 117.0(2)   | C00F | C019 | C01M | 120.8(3)   |
| O003  | C00E | N008  | 122.5(2)   | C010 | C01A | C00V | 119.1(3)   |
| O003  | C00E | C00G1 | 132.7(2)   | C00K | C01B | C01H | 121.6(3)   |
| N008  | C00E | C00G1 | 104.8(2)   | N008 | C01C | C01T | 114.2(2)   |
| C00U  | C00F | N009  | 120.6(2)   | C00L | C01D | S01  | 127.0(2)   |
| C019  | C00F | N009  | 120.3(3)   | C00X | C01D | S01  | 109.51(19) |
| C019  | C00F | C00U  | 119.1(3)   | C00X | C01D | C00L | 123.5(2)   |
| C00G1 | C00G | C00E1 | 107.6(3)   | C01Q | C01E | C00R | 121.1(3)   |
| C00L  | C00G | C00E1 | 143.2(2)   | C01K | C01F | C00M | 120.1(3)   |
| C00L  | C00G | C00G1 | 109.2(3)   | C00U | C01G | C01J | 120.2(3)   |
| C00Z  | C00H | C00N  | 121.5(3)   | C01B | C01H | C01O | 119.5(3)   |
| C00D  | C00I | S01   | 122.4(2)   | C01L | C01I | C015 | 120.3(3)   |
| C013  | C00I | S01   | 109.82(19) | O00A | C01J | C01G | 115.3(3)   |
| C013  | C00I | C00D  | 127.8(2)   | O00A | C01J | C01M | 124.7(3)   |
| C00W  | C00J | C00D  | 121.1(2)   | C01M | C01J | C01G | 120.0(3)   |
| C014  | C00K | N006  | 120.3(2)   | C010 | C01K | C01F | 119.9(3)   |
| C01B  | C00K | N006  | 121.2(2)   | O005 | C01L | C01I | 125.0(3)   |
| C01B  | C00K | C014  | 118.5(2)   | O005 | C01L | C01Q | 115.2(3)   |
| N008  | C00L | C00G  | 106.8(2)   | C01I | C01L | C01Q | 119.8(3)   |
| N008  | C00L | C01D  | 127.0(2)   | C01J | C01M | C019 | 119.5(3)   |
| C00G  | C00L | C01D  | 126.2(2)   | C012 | C01N | S02  | 126.8(2)   |
| C00V  | C00M | N006  | 120.4(2)   | C01R | C01N | S02  | 109.3(2)   |
| C00V  | C00M | C01F  | 119.3(2)   | C01R | C01N | C012 | 123.9(3)   |
| C01F  | C00M | N006  | 120.2(2)   | O00C | C01O | C018 | 115.9(3)   |
| C00H  | C00N | C011  | 117.2(2)   | O00C | C01O | C01H | 124.9(3)   |
| C00H  | C00N | C017  | 122.8(3)   | C018 | C01O | C01H | 119.2(3)   |
| C011  | C00N | C017  | 120.1(3)   | N00B | C01P | C01U | 114.4(2)   |
| O004  | C00O | N00B  | 122.3(3)   | C01E | C01Q | C01L | 119.6(3)   |
| O004  | C00O | C00S2 | 133.8(2)   | C01N | C01R | C01S | 114.1(3)   |
| N00B  | C00O | C00S2 | 104.0(2)   | C017 | C01S | C01R | 113.5(3)   |

## Supplementary Information

|       |      |       |          |      |      |      |          |
|-------|------|-------|----------|------|------|------|----------|
| C00Y  | C00P | N009  | 121.7(2) | C01C | C01T | C022 | 107.3(3) |
| C00Y  | C00P | C00Z  | 118.4(2) | C021 | C01T | C01C | 116.3(3) |
| C00Z  | C00P | N009  | 119.9(2) | C021 | C01T | C022 | 113.7(3) |
| C016  | C00Q | C00D  | 122.1(2) | C020 | C01U | C01P | 112.2(3) |
| C015  | C00R | N009  | 120.8(2) | C020 | C01U | C023 | 112.3(4) |
| C015  | C00R | C01E  | 119.0(3) | C023 | C01U | C01P | 109.3(3) |
| C01E  | C00R | N009  | 120.2(2) | C01U | C020 | C024 | 115.7(3) |
| C00S2 | C00S | C00O2 | 108.9(3) | C01T | C021 | C01Y | 115.5(4) |
| C012  | C00S | C00O2 | 142.3(3) | C026 | C022 | C01T | 115.3(4) |
| C012  | C00S | C00S2 | 108.7(3) | C025 | C023 | C01U | 117.2(4) |
| C00W  | C00T | N006  | 121.6(2) | C023 | C025 | C028 | 114.9(5) |
| C00W  | C00T | C016  | 117.6(2) | C0AA | C026 | C022 | 126.4(6) |
| C016  | C00T | N006  | 120.9(2) | C025 | C028 | C02A | 113.4(5) |
| C01G  | C00U | C00F  | 120.3(3) | C026 | C0AA | C1   | 114.1(6) |

**Supplementary Table 12.** Hydrogen Atom Coordinates ( $\text{\AA}\times 10^4$ ) and Isotropic Displacement Parameters ( $\text{\AA}^2\times 10^3$ ) for **TPAOMe-TDPP**.

| Atom | x        | y       | z       | U(eq) |
|------|----------|---------|---------|-------|
| H00H | 3146.32  | 5805.22 | 350.82  | 48    |
| H00J | 7760.68  | 5804.89 | 4494.86 | 46    |
| H00Q | 8970.03  | 6524.62 | 5837.73 | 48    |
| H00U | 1179.82  | 7370.34 | 490.59  | 53    |
| H00V | 2188.44  | 6640.3  | 4730.94 | 49    |
| H00W | 5628.34  | 6171.7  | 4459.61 | 46    |
| H00X | 13003.31 | 5651.29 | 5776.68 | 54    |
| H00Y | 1199.83  | 6898.85 | -963.57 | 52    |
| H00Z | 1046.94  | 6178.87 | 372.96  | 50    |
| H011 | 3284.89  | 6523.35 | -985.35 | 54    |
| H013 | 10937.46 | 6078.5  | 5928.27 | 54    |
| H014 | 4368.19  | 7848.13 | 5203.63 | 49    |
| H015 | -1188.52 | 7826.76 | -410.58 | 52    |
| H016 | 6858.39  | 6885.96 | 5805.15 | 49    |
| H018 | 3865.97  | 8304.04 | 5898.69 | 57    |
| H019 | -2499.71 | 6694.51 | 150.77  | 54    |
| H01A | 910.12   | 6844.79 | 3944.54 | 53    |
| H01B | 4278.9   | 6487.77 | 5970.7  | 52    |
| H01C | 11282.34 | 4837.16 | 4153.25 | 51    |
| H01D | 12229.79 | 4519.61 | 3844.93 | 51    |



## Supplementary Information

---

|               |         |          |     |
|---------------|---------|----------|-----|
| H01Q -1328.36 | 6419.28 | -1116.79 | 58  |
| H01F 5464.32  | 7320.12 | 4308.49  | 52  |
| H01R 721.78   | 7589.75 | 1285.12  | 60  |
| H01H 3763.8   | 6944.18 | 6667.44  | 57  |
| H01S -2520.75 | 8188.61 | -1123.65 | 58  |
| H01K 4216     | 7500.2  | 3513.36  | 58  |
| H01U -2981.79 | 6931.29 | 943.85   | 58  |
| H01V 8173.14  | 4672.65 | 1185.15  | 57  |
| H01W 6954.09  | 4937.44 | 826.35   | 57  |
| H01X -2634.41 | 6778.18 | -1826.82 | 61  |
| H01Y 7397.03  | 5614.22 | -851.33  | 67  |
| H01Z 5187.09  | 6026.54 | -1054.84 | 68  |
| H01T 11653.68 | 5612.35 | 3753.91  | 96  |
| H01 7729.3    | 5779.96 | 1117.52  | 78  |
| H01E 107.72   | 7259.01 | 2676.55  | 112 |
| H01G -136.65  | 7304.41 | 3243.31  | 112 |
| H01I 382.15   | 6770.27 | 3042.78  | 112 |
| H01J 2470.58  | 7485.62 | 7097.07  | 115 |
| H01L 2915.32  | 7997.52 | 7414.85  | 115 |
| H01M 3989.85  | 7556.12 | 7358.77  | 115 |
| H1AA -4235.19 | 8334.61 | -2360.23 | 118 |
| H -2854.45    | 8439.18 | -1996.88 | 118 |
| HA -4202.67   | 8369.19 | -1769.18 | 118 |
| H01N 12194.68 | 5932.53 | 2831.16  | 108 |
| H01O 13784.6  | 5945.48 | 2871.72  | 108 |
| H01P 13083.66 | 6232.52 | 3283.95  | 108 |
| H2AA -3357.03 | 7486.91 | 1602.24  | 123 |
| HB -2634.65   | 7425.01 | 2169.08  | 123 |
| HC -2778      | 6934.78 | 1802.1   | 123 |
| H02G 10056.63 | 5556.84 | 1342.79  | 92  |
| H02H 9720.13  | 5273.57 | 1830.92  | 92  |
| H02A 13362.74 | 5140.78 | 3163.33  | 91  |
| H02B 13906.46 | 5469.25 | 3653.28  | 91  |
| H02C 10709.77 | 5344.25 | 2882.87  | 118 |

## Supplementary Information

|               |         |         |     |
|---------------|---------|---------|-----|
| H02D 10821.95 | 4763.05 | 3089.48 | 118 |
| H02I 7145     | 5063.34 | 1863.27 | 108 |
| H02J 7247.68  | 5670.52 | 1975.69 | 108 |
| H02K 9510.78  | 6374.23 | 1662.5  | 130 |
| H02L 10629.46 | 6097.27 | 2059.22 | 130 |
| H02M 9106.03  | 6097.01 | 2144.39 | 130 |
| H02N 5323.1   | 5213.54 | 1234.24 | 123 |
| H02O 5419.12  | 5819.8  | 1357.37 | 123 |
| H02E 9365.01  | 4951.91 | 3639.47 | 145 |
| H02F 9302     | 5541    | 3471.83 | 145 |
| H02P 4880.5   | 5643.82 | 2173.09 | 154 |
| H02Q 4736.91  | 5041.19 | 2033.87 | 154 |
| H02R 2894.24  | 5284.49 | 1362.43 | 218 |
| H02S 2955.85  | 5851.73 | 1605.13 | 218 |
| H02T 2561.15  | 5362.87 | 1914.56 | 218 |
| H1A 6053.09   | 5270.27 | 3034.24 | 226 |
| H1B 7018.71   | 5635.6  | 3409.72 | 226 |
| H1C 6750.05   | 5050.67 | 3564.75 | 226 |
| H0AA 7995.11  | 4716.02 | 2975.39 | 201 |
| H0AB 8071.68  | 5272.73 | 2721.8  | 201 |

## 2.6. X-ray crystallographic data for Py-TDPP

Supplementary Table 13. Crystal data and structure refinement for Py-TDPP.

| Identification code | Py-TDPP                                                                                      |
|---------------------|----------------------------------------------------------------------------------------------|
| Empirical formula   | C <sub>63</sub> H <sub>58</sub> Cl <sub>2</sub> N <sub>2</sub> O <sub>2</sub> S <sub>2</sub> |
| Formula weight      | 1010.13                                                                                      |
| Temperature/K       | 99.99(10)                                                                                    |
| Crystal system      | triclinic                                                                                    |
| Space group         | P-1                                                                                          |
| a/Å                 | 10.3358(6)                                                                                   |

## Supplementary Information

|                                            |                                         |
|--------------------------------------------|-----------------------------------------|
| b/Å                                        | 13.2950(9)                              |
| c/Å                                        | 18.9731(13)                             |
| $\alpha$ /°                                | 80.781(6)                               |
| $\beta$ /°                                 | 80.217(5)                               |
| $\gamma$ /°                                | 85.950(5)                               |
| Volume/Å <sup>3</sup>                      | 2533.6(3)                               |
| Z                                          | 2                                       |
| $\rho$ calcg/cm <sup>3</sup>               | 1.324                                   |
| $\mu$ /mm <sup>-1</sup>                    | 2.295                                   |
| F(000)                                     | 1064.0                                  |
| Crystal size/mm <sup>3</sup>               | 0.12 × 0.11 × 0.1                       |
| Radiation                                  | CuK $\alpha$ ( $\lambda$ = 1.54178)     |
| 2 $\Theta$ range for data collection/°     | 7.656 to 150.006                        |
| Index ranges                               | -12 ≤ h ≤ 12, -8 ≤ k ≤ 16, -23 ≤ l ≤ 23 |
| Reflections collected                      | 15267                                   |
| Independent reflections                    | 9842 [Rint = 0.0571, Rsigma = 0.0982]   |
| Data/restraints/parameters                 | 9842/22/654                             |
| Goodness-of-fit on F <sup>2</sup>          | 0.999                                   |
| Final R indexes [ $I \geq 2\sigma(I)$ ]    | R1 = 0.0778, wR2 = 0.2030               |
| Final R indexes [all data]                 | R1 = 0.1124, wR2 = 0.2359               |
| Largest diff. peak/hole / e Å <sup>3</sup> | 0.57/-0.78                              |

**Supplementary Table 14.** Fractional Atomic Coordinates ( $\times 10^4$ ) and Equivalent Isotropic Displacement Parameters ( $\text{Å}^2 \times 10^3$ ) for **Py-TDPP**. Ueqs defined as 1/3 of of the trace of the orthogonalised UIJtensor.

| Atom | x          | y         | z          | U(eq)     |
|------|------------|-----------|------------|-----------|
| Cl1  | 1956(5)    | 6250(4)   | 9492(2)    | 178(2)    |
| Cl2  | 4714(3)    | 6395(3)   | 9587.6(18) | 135.0(15) |
| C63  | 3281(10)   | 7033(8)   | 9391(6)    | 104(3)    |
| S1   | 10333.8(8) | 9496.9(7) | 6410.4(5)  | 27.4(2)   |
| S2   | 6490.0(8)  | 6345.7(7) | 3419.7(5)  | 29.3(2)   |
| O1   | 11093(2)   | 7620(2)   | 4075.0(15) | 31.1(6)   |
| O2   | 5760(2)    | 8586(2)   | 5557.8(15) | 32.8(6)   |
| N1   | 8992(3)    | 7238(2)   | 3949.3(16) | 26.2(6)   |
| N2   | 7864(3)    | 8840(2)   | 5748.9(16) | 26.1(6)   |
| C1   | 9899(3)    | 7681(3)   | 4280.7(19) | 26.7(7)   |
| C2   | 9093(3)    | 8148(3)   | 4847.1(19) | 24.5(7)   |
| C3   | 9154(3)    | 8668(2)   | 5417.6(19) | 24.9(7)   |
| C4   | 6953(3)    | 8459(3)   | 5389(2)    | 27.3(7)   |

## Supplementary Information

---

|     |          |          |            |          |
|-----|----------|----------|------------|----------|
| C5  | 7765(3)  | 7980(3)  | 4831(2)    | 26.8(7)  |
| C6  | 7702(3)  | 7395(3)  | 4285.3(19) | 26.4(7)  |
| C7  | 9440(3)  | 6738(3)  | 3316.5(19) | 26.5(7)  |
| C8  | 9203(3)  | 7404(3)  | 2605(2)    | 28.4(7)  |
| C9  | 9263(4)  | 6717(3)  | 2025(2)    | 34.0(8)  |
| C10 | 8743(5)  | 7239(4)  | 1345(3)    | 45.4(10) |
| C11 | 8592(8)  | 6443(6)  | 852(4)     | 85(2)    |
| C12 | 7988(9)  | 6906(6)  | 193(4)     | 91(2)    |
| C13 | 10127(4) | 8303(3)  | 2384(2)    | 31.6(8)  |
| C14 | 11573(4) | 8007(3)  | 2170(3)    | 42.6(10) |
| C15 | 10313(3) | 8964(3)  | 5637.1(19) | 25.1(7)  |
| C16 | 11590(3) | 8815(3)  | 5293.9(19) | 26.2(7)  |
| C17 | 12541(3) | 9108(3)  | 5653.0(19) | 25.8(7)  |
| C18 | 12024(3) | 9478(3)  | 6286.3(19) | 26.4(7)  |
| C19 | 12735(3) | 9872(2)  | 6785(2)    | 25.6(7)  |
| C20 | 12389(3) | 9692(3)  | 7546(2)    | 26.8(7)  |
| C21 | 11359(4) | 9033(3)  | 7931(2)    | 32.8(8)  |
| C22 | 11039(4) | 8900(3)  | 8663(2)    | 37.7(9)  |
| C23 | 11732(4) | 9377(3)  | 9100(2)    | 38.1(9)  |
| C24 | 11427(5) | 9235(4)  | 9860(2)    | 47.8(11) |
| C25 | 12155(5) | 9681(4)  | 10264(3)   | 49.8(11) |
| C26 | 13199(5) | 10266(4) | 9929(2)    | 44.1(10) |
| C27 | 13540(4) | 10438(3) | 9173(2)    | 35.9(8)  |
| C28 | 14603(4) | 11065(3) | 8804(2)    | 37.7(9)  |
| C29 | 14907(4) | 11216(3) | 8083(2)    | 35.6(8)  |
| C30 | 14193(3) | 10753(3) | 7637(2)    | 30.2(7)  |
| C31 | 14528(3) | 10893(3) | 6891(2)    | 31.0(8)  |
| C32 | 13820(3) | 10456(3) | 6467(2)    | 28.9(7)  |
| C33 | 13117(4) | 10142(3) | 7979(2)    | 28.6(7)  |
| C34 | 12798(4) | 9983(3)  | 8746(2)    | 32.6(8)  |
| C35 | 7397(3)  | 9254(3)  | 6418.0(19) | 26.8(7)  |
| C36 | 7520(3)  | 8465(3)  | 7096(2)    | 29.3(7)  |
| C37 | 6599(4)  | 7588(3)  | 7184(2)    | 31.4(8)  |
| C38 | 5129(4)  | 7865(3)  | 7354(3)    | 39.5(9)  |
| C39 | 4298(5)  | 6949(4)  | 7390(4)    | 60.9(15) |
| C40 | 4375(5)  | 6580(4)  | 6663(4)    | 67.0(17) |
| C41 | 7359(4)  | 9015(3)  | 7759(2)    | 35.8(8)  |
| C42 | 7578(5)  | 8303(3)  | 8452(2)    | 43.7(10) |
| C43 | 6541(3)  | 7006(3)  | 4131(2)    | 27.9(7)  |
| C44 | 5287(3)  | 7154(3)  | 4496(2)    | 29.9(7)  |

Supplementary Information

|      |          |          |          |           |
|------|----------|----------|----------|-----------|
| C45  | 4307(4)  | 6780(3)  | 4186(2)  | 31.6(8)   |
| C46  | 4791(3)  | 6322(3)  | 3586(2)  | 29.0(7)   |
| C47  | 4140(3)  | 5917(3)  | 3068(2)  | 28.7(7)   |
| C48  | 2986(3)  | 5349(3)  | 3294(2)  | 26.5(7)   |
| C49  | 2435(4)  | 5036(3)  | 4035(2)  | 31.5(8)   |
| C50  | 1325(4)  | 4495(3)  | 4218(2)  | 33.1(8)   |
| C51  | 683(4)   | 4206(3)  | 3683(2)  | 33.2(8)   |
| C52  | -467(4)  | 3646(3)  | 3867(3)  | 40.8(10)  |
| C53  | -1039(4) | 3350(3)  | 3320(3)  | 46.9(11)  |
| C54  | -520(4)  | 3600(3)  | 2610(3)  | 44.7(11)  |
| C55  | 622(4)   | 4154(3)  | 2392(3)  | 36.0(9)   |
| C56  | 1203(5)  | 4412(3)  | 1657(3)  | 42.6(10)  |
| C57  | 2313(4)  | 4920(3)  | 1462(2)  | 39.0(9)   |
| C58  | 2935(4)  | 5253(3)  | 2000(2)  | 32.7(8)   |
| C59  | 4105(4)  | 5791(3)  | 1810(2)  | 34.9(8)   |
| C60  | 4674(4)  | 6108(3)  | 2337(2)  | 31.4(8)   |
| C61  | 1218(4)  | 4469(3)  | 2950(2)  | 30.8(8)   |
| C62  | 2392(3)  | 5031(3)  | 2743(2)  | 29.1(7)   |
| Cl2A | 4304(14) | 7297(14) | 9864(8)  | 135.0(15) |
| C63A | 2850(30) | 6760(16) | 9853(17) | 104(3)    |
| Cl1A | 3290(20) | 5752(15) | 9324(11) | 178(2)    |

**Supplementary Table 15.** Anisotropic Displacement Parameters ( $\text{\AA}^2 \times 10^3$ ) for **Py-TDPP**. The anisotropic displacement factor exponent takes the form:  $-2\pi^2[h^2a^{*2}U_{11}+2hka^*b^*U_{12}+\dots]$ .

| Atom | U11      | U22      | U33      | U23       | U13      | U12      |
|------|----------|----------|----------|-----------|----------|----------|
| Cl1  | 187(4)   | 167(4)   | 181(4)   | 88(3)     | -104(4)  | -88(3)   |
| Cl2  | 82.3(17) | 173(3)   | 116(2)   | 39(2)     | 8.5(14)  | 30.7(18) |
| C63  | 93(7)    | 96(7)    | 100(7)   | 25(6)     | 1(5)     | 21(5)    |
| S1   | 19.1(4)  | 29.3(4)  | 35.8(5)  | -8.5(3)   | -5.8(3)  | -2.5(3)  |
| S2   | 19.7(4)  | 30.3(4)  | 39.8(5)  | -10.3(3)  | -3.9(3)  | -5.0(3)  |
| O1   | 18.1(11) | 37.1(14) | 40.0(14) | -11.2(11) | -4.2(10) | -3.4(10) |
| O2   | 18.8(12) | 41.5(15) | 40.3(14) | -12.7(11) | -5.1(10) | 0.1(10)  |
| N1   | 20.3(13) | 27.9(14) | 31.4(15) | -6.9(11)  | -3.5(11) | -3.8(11) |
| N2   | 18.9(13) | 30.1(15) | 30.2(15) | -6.5(11)  | -3.8(11) | -2.2(11) |
| C1   | 20.5(16) | 27.3(17) | 32.7(17) | -4.0(13)  | -3.4(13) | -6.1(13) |
| C2   | 16.6(15) | 23.6(15) | 33.4(17) | -2.1(13)  | -5.5(12) | -4.4(12) |
| C3   | 20.8(15) | 20.0(15) | 33.0(17) | 0.0(13)   | -5.0(13) | -2.0(12) |
| C4   | 19.1(15) | 28.2(17) | 34.6(18) | -3.3(14)  | -5.0(13) | -1.7(13) |
| C5   | 16.5(15) | 28.0(17) | 35.4(18) | -3.9(14)  | -3.3(12) | -1.8(12) |
| C6   | 19.4(15) | 24.5(16) | 34.2(18) | 0.0(13)   | -4.8(13) | -2.6(12) |

## Supplementary Information

---

|     |          |          |          |           |           |          |
|-----|----------|----------|----------|-----------|-----------|----------|
| C7  | 22.6(15) | 24.2(16) | 33.6(18) | -6.5(13)  | -4.4(13)  | -3.0(13) |
| C8  | 23.0(16) | 25.1(16) | 37.8(19) | -6.7(14)  | -4.4(13)  | -1.8(13) |
| C9  | 30.2(18) | 33.6(19) | 40(2)    | -8.5(15)  | -8.3(15)  | 0.8(15)  |
| C10 | 47(2)    | 48(2)    | 45(2)    | -10.4(19) | -18.9(19) | 6.9(19)  |
| C11 | 105(5)   | 97(5)    | 63(4)    | -39(3)    | -41(4)    | 45(4)    |
| C12 | 128(7)   | 85(5)    | 67(4)    | -22(4)    | -36(4)    | 17(5)    |
| C13 | 29.9(18) | 26.2(17) | 37.9(19) | -2.7(14)  | -5.2(14)  | -1.9(14) |
| C14 | 28.8(19) | 37(2)    | 59(3)    | -0.7(19)  | -4.2(18)  | -2.8(16) |
| C15 | 22.8(16) | 21.6(15) | 31.8(17) | -5.8(12)  | -5.6(13)  | -0.2(12) |
| C16 | 22.3(16) | 23.8(16) | 32.2(17) | -2.5(13)  | -4.0(13)  | -4.8(12) |
| C17 | 20.8(15) | 22.5(16) | 34.4(18) | -2.9(13)  | -5.3(13)  | -3.4(12) |
| C18 | 23.3(16) | 22.1(15) | 33.5(18) | 0.5(13)   | -7.0(13)  | -3.3(12) |
| C19 | 20.4(15) | 20.4(15) | 38.0(18) | -4.1(13)  | -11.3(13) | 0.1(12)  |
| C20 | 22.7(16) | 20.0(15) | 39.1(19) | -4.3(13)  | -9.4(14)  | 0.7(12)  |
| C21 | 30.5(18) | 33.0(19) | 35.9(19) | -3.3(15)  | -7.5(15)  | -8.0(15) |
| C22 | 35(2)    | 37(2)    | 40(2)    | 1.6(16)   | -6.9(16)  | -7.2(16) |
| C23 | 35(2)    | 38(2)    | 40(2)    | -2.3(16)  | -5.4(16)  | -2.6(16) |
| C24 | 48(3)    | 55(3)    | 39(2)    | -4.4(19)  | -3.3(19)  | -9(2)    |
| C25 | 57(3)    | 56(3)    | 36(2)    | -6.5(19)  | -9.6(19)  | 4(2)     |
| C26 | 47(2)    | 50(2)    | 42(2)    | -15.7(19) | -17.6(18) | 5.5(19)  |
| C27 | 36(2)    | 34.1(19) | 42(2)    | -12.6(16) | -15.3(16) | 4.6(16)  |
| C28 | 29.9(19) | 32.8(19) | 57(3)    | -16.2(17) | -18.6(17) | 0.5(15)  |
| C29 | 26.7(18) | 28.0(18) | 57(2)    | -12.5(16) | -15.5(16) | 0.7(14)  |
| C30 | 20.3(16) | 25.9(17) | 47(2)    | -8.7(15)  | -9.8(14)  | 2.4(13)  |
| C31 | 21.9(16) | 23.6(16) | 49(2)    | -5.8(15)  | -9.8(14)  | -0.3(13) |
| C32 | 21.6(16) | 29.0(17) | 37.7(19) | -7.0(14)  | -6.9(13)  | -1.8(13) |
| C33 | 25.3(16) | 23.4(16) | 38.3(19) | -6.6(13)  | -8.2(14)  | 2.7(13)  |
| C34 | 26.5(17) | 29.3(18) | 43(2)    | -6.4(15)  | -10.0(15) | 2.4(14)  |
| C35 | 23.3(16) | 25.5(16) | 32.2(18) | -5.6(13)  | -5.1(13)  | -1.0(13) |
| C36 | 25.2(16) | 29.3(17) | 33.4(18) | -6.5(14)  | -3.8(13)  | 0.8(14)  |
| C37 | 24.5(17) | 28.4(18) | 40(2)    | -3.3(14)  | -5.1(14)  | 0.5(14)  |
| C38 | 27.6(19) | 29.8(19) | 54(2)    | 3.9(17)   | 3.4(16)   | -3.8(15) |
| C39 | 31(2)    | 47(3)    | 100(4)   | 12(3)     | -13(2)    | -10(2)   |
| C40 | 35(2)    | 40(3)    | 129(6)   | -12(3)    | -22(3)    | -2(2)    |
| C41 | 42(2)    | 28.5(18) | 36(2)    | -8.7(15)  | -1.0(16)  | 1.3(15)  |
| C42 | 54(3)    | 42(2)    | 35(2)    | -6.5(17)  | -5.2(18)  | -5.0(19) |
| C43 | 24.0(17) | 23.1(16) | 38.2(19) | -6.0(14)  | -7.3(14)  | -2.2(13) |
| C44 | 20.9(16) | 30.3(18) | 37.9(19) | -3.7(14)  | -2.0(13)  | -6.2(13) |
| C45 | 24.4(17) | 34.0(19) | 36.2(19) | -4.0(15)  | -4.3(14)  | -4.6(14) |
| C46 | 21.9(16) | 25.5(16) | 38.6(19) | -1.5(14)  | -3.4(13)  | -6.1(13) |

## Supplementary Information

|      |          |          |          |           |           |           |
|------|----------|----------|----------|-----------|-----------|-----------|
| C47  | 21.2(16) | 25.6(17) | 39.5(19) | -2.7(14)  | -5.6(14)  | -5.1(13)  |
| C48  | 20.3(15) | 22.6(16) | 36.7(18) | -4.8(13)  | -3.5(13)  | -2.5(12)  |
| C49  | 28.6(18) | 24.2(17) | 42(2)    | -3.4(14)  | -7.6(15)  | -5.5(14)  |
| C50  | 27.0(17) | 26.8(17) | 43(2)    | -0.7(15)  | -1.4(15)  | -3.2(14)  |
| C51  | 24.5(17) | 20.2(16) | 55(2)    | -0.5(15)  | -9.8(15)  | -3.4(13)  |
| C52  | 28.4(19) | 30.5(19) | 62(3)    | 4.8(18)   | -10.6(17) | -8.4(15)  |
| C53  | 27.3(19) | 28.6(19) | 85(3)    | 4(2)      | -18(2)    | -11.2(16) |
| C54  | 36(2)    | 28.3(19) | 75(3)    | -1.5(19)  | -26(2)    | -7.7(16)  |
| C55  | 28.2(18) | 23.3(17) | 61(3)    | -8.6(16)  | -17.3(17) | -0.2(14)  |
| C56  | 45(2)    | 32(2)    | 60(3)    | -14.5(18) | -27(2)    | 2.9(17)   |
| C57  | 40(2)    | 37(2)    | 45(2)    | -14.5(17) | -16.1(17) | 5.1(17)   |
| C58  | 30.3(18) | 27.3(17) | 43(2)    | -10.1(15) | -10.4(15) | 1.6(14)   |
| C59  | 33.3(19) | 36(2)    | 36.1(19) | -9.5(15)  | -2.9(15)  | -1.4(15)  |
| C60  | 24.6(16) | 29.5(18) | 39(2)    | -4.8(14)  | -1.6(14)  | -5.8(14)  |
| C61  | 24.7(17) | 16.7(15) | 53(2)    | -4.0(14)  | -11.3(15) | -2.0(12)  |
| C62  | 23.5(16) | 21.9(16) | 44(2)    | -9.0(14)  | -7.4(14)  | 0.2(13)   |
| Cl2A | 82.3(17) | 173(3)   | 116(2)   | 39(2)     | 8.5(14)   | 30.7(18)  |
| C63A | 93(7)    | 96(7)    | 100(7)   | 25(6)     | 1(5)      | 21(5)     |
| Cl1A | 187(4)   | 167(4)   | 181(4)   | 88(3)     | -104(4)   | -88(3)    |

**Supplementary Table 16. Bond Lengths for Py-TDPP.**

| tom | Atom | Length/Å  | Atom | Atom | Length/Å |
|-----|------|-----------|------|------|----------|
| Cl1 | C63  | 1.745(11) | C26  | C27  | 1.402(6) |
| Cl2 | C63  | 1.721(10) | C27  | C28  | 1.439(6) |
| S1  | C15  | 1.732(4)  | C27  | C34  | 1.430(5) |
| S1  | C18  | 1.722(4)  | C28  | C29  | 1.335(6) |
| S2  | C43  | 1.734(4)  | C29  | C30  | 1.444(5) |
| S2  | C46  | 1.732(4)  | C30  | C31  | 1.385(6) |
| O1  | C1   | 1.231(4)  | C30  | C33  | 1.425(5) |
| O2  | C4   | 1.227(4)  | C31  | C32  | 1.389(5) |
| N1  | C1   | 1.420(4)  | C33  | C34  | 1.421(6) |
| N1  | C6   | 1.394(4)  | C35  | C36  | 1.541(5) |
| N1  | C7   | 1.457(5)  | C36  | C37  | 1.528(5) |
| N2  | C3   | 1.394(4)  | C36  | C41  | 1.534(5) |
| N2  | C4   | 1.417(5)  | C37  | C38  | 1.529(5) |
| N2  | C35  | 1.458(5)  | C38  | C39  | 1.525(6) |
| C1  | C2   | 1.438(5)  | C39  | C40  | 1.524(9) |
| C2  | C3   | 1.387(5)  | C41  | C42  | 1.532(6) |
| C2  | C5   | 1.413(4)  | C43  | C44  | 1.379(5) |
| C3  | C15  | 1.432(5)  | C44  | C45  | 1.410(5) |
| C4  | C5   | 1.439(5)  | C45  | C46  | 1.378(6) |

## Supplementary Information

|     |     |          |      |      |          |
|-----|-----|----------|------|------|----------|
| C5  | C6  | 1.402(5) | C46  | C47  | 1.468(5) |
| C6  | C43 | 1.431(5) | C47  | C48  | 1.424(5) |
| C7  | C8  | 1.539(5) | C47  | C60  | 1.393(5) |
| C8  | C9  | 1.528(5) | C48  | C49  | 1.430(5) |
| C8  | C13 | 1.543(5) | C48  | C62  | 1.431(5) |
| C9  | C10 | 1.528(6) | C49  | C50  | 1.362(5) |
| C10 | C11 | 1.550(8) | C50  | C51  | 1.416(6) |
| C11 | C12 | 1.516(9) | C51  | C52  | 1.410(5) |
| C13 | C14 | 1.522(5) | C51  | C61  | 1.405(6) |
| C15 | C16 | 1.385(5) | C52  | C53  | 1.397(7) |
| C16 | C17 | 1.395(5) | C53  | C54  | 1.361(7) |
| C17 | C18 | 1.380(5) | C54  | C55  | 1.402(6) |
| C18 | C19 | 1.469(5) | C55  | C56  | 1.419(7) |
| C19 | C20 | 1.414(5) | C55  | C61  | 1.442(6) |
| C19 | C32 | 1.402(5) | C56  | C57  | 1.340(6) |
| C20 | C21 | 1.448(5) | C57  | C58  | 1.435(6) |
| C20 | C33 | 1.425(5) | C58  | C59  | 1.412(5) |
| C21 | C22 | 1.358(6) | C58  | C62  | 1.418(6) |
| C22 | C23 | 1.426(6) | C59  | C60  | 1.376(6) |
| C23 | C24 | 1.408(6) | C61  | C62  | 1.434(5) |
| C23 | C34 | 1.420(5) | Cl2A | C63A | 1.71(2)  |
| C24 | C25 | 1.382(7) | C63A | Cl1A | 1.79(2)  |
| C25 | C26 | 1.378(7) |      |      |          |

**Supplementary Table 17. Bond Angles for Py-TDPP.**

| Atom | Atom | Atom | Angle/°   | Atom | Atom | Atom | Angle/°  |
|------|------|------|-----------|------|------|------|----------|
| Cl2  | C63  | Cl1  | 114.1(6)  | C29  | C28  | C27  | 121.6(4) |
| C18  | S1   | C15  | 93.16(17) | C28  | C29  | C30  | 121.6(4) |
| C46  | S2   | C43  | 93.15(18) | C31  | C30  | C29  | 121.5(3) |
| C1   | N1   | C7   | 120.8(3)  | C31  | C30  | C33  | 119.8(3) |
| C6   | N1   | C1   | 111.5(3)  | C33  | C30  | C29  | 118.7(4) |
| C6   | N1   | C7   | 127.6(3)  | C30  | C31  | C32  | 121.0(3) |
| C3   | N2   | C4   | 111.4(3)  | C31  | C32  | C19  | 120.7(4) |
| C3   | N2   | C35  | 128.7(3)  | C30  | C33  | C20  | 119.4(3) |
| C4   | N2   | C35  | 119.6(3)  | C34  | C33  | C20  | 121.2(3) |
| O1   | C1   | N1   | 122.3(3)  | C34  | C33  | C30  | 119.4(3) |
| O1   | C1   | C2   | 133.1(3)  | C23  | C34  | C27  | 119.0(4) |
| N1   | C1   | C2   | 104.6(3)  | C23  | C34  | C33  | 120.5(4) |
| C3   | C2   | C1   | 142.7(3)  | C33  | C34  | C27  | 120.5(4) |
| C3   | C2   | C5   | 109.0(3)  | N2   | C35  | C36  | 112.4(3) |
| C5   | C2   | C1   | 108.2(3)  | C37  | C36  | C35  | 112.6(3) |



## Supplementary Information

---

|     |     |     |          |     |     |     |          |
|-----|-----|-----|----------|-----|-----|-----|----------|
| N2  | C3  | C15 | 126.0(3) | C37 | C36 | C41 | 113.7(3) |
| C2  | C3  | N2  | 106.9(3) | C41 | C36 | C35 | 109.2(3) |
| C2  | C3  | C15 | 127.1(3) | C36 | C37 | C38 | 116.1(3) |
| O2  | C4  | N2  | 122.6(3) | C39 | C38 | C37 | 111.8(4) |
| O2  | C4  | C5  | 133.2(3) | C40 | C39 | C38 | 113.4(4) |
| N2  | C4  | C5  | 104.1(3) | C42 | C41 | C36 | 113.1(3) |
| C2  | C5  | C4  | 108.5(3) | C6  | C43 | S2  | 124.9(3) |
| C6  | C5  | C2  | 109.3(3) | C44 | C43 | S2  | 109.8(3) |
| C6  | C5  | C4  | 142.3(3) | C44 | C43 | C6  | 125.2(4) |
| N1  | C6  | C5  | 106.3(3) | C43 | C44 | C45 | 113.5(4) |
| N1  | C6  | C43 | 127.3(3) | C46 | C45 | C44 | 113.8(3) |
| C5  | C6  | C43 | 126.3(3) | C45 | C46 | S2  | 109.7(3) |
| N1  | C7  | C8  | 113.0(3) | C45 | C46 | C47 | 132.2(3) |
| C7  | C8  | C13 | 112.5(3) | C47 | C46 | S2  | 118.0(3) |
| C9  | C8  | C7  | 108.7(3) | C48 | C47 | C46 | 121.8(3) |
| C9  | C8  | C13 | 114.1(3) | C60 | C47 | C46 | 118.3(3) |
| C10 | C9  | C8  | 113.8(3) | C60 | C47 | C48 | 119.9(3) |
| C9  | C10 | C11 | 110.3(4) | C47 | C48 | C49 | 123.9(3) |
| C12 | C11 | C10 | 112.7(6) | C47 | C48 | C62 | 117.3(3) |
| C14 | C13 | C8  | 115.3(3) | C49 | C48 | C62 | 118.6(3) |
| C3  | C15 | S1  | 124.8(3) | C50 | C49 | C48 | 121.2(4) |
| C16 | C15 | S1  | 109.3(3) | C49 | C50 | C51 | 121.4(4) |
| C16 | C15 | C3  | 125.7(3) | C52 | C51 | C50 | 121.9(4) |
| C15 | C16 | C17 | 113.8(3) | C61 | C51 | C50 | 119.1(3) |
| C18 | C17 | C16 | 113.6(3) | C61 | C51 | C52 | 119.0(4) |
| C17 | C18 | S1  | 110.0(3) | C53 | C52 | C51 | 119.7(4) |
| C17 | C18 | C19 | 127.9(3) | C54 | C53 | C52 | 121.4(4) |
| C19 | C18 | S1  | 122.0(3) | C53 | C54 | C55 | 121.7(4) |
| C20 | C19 | C18 | 123.9(3) | C54 | C55 | C56 | 123.1(4) |
| C32 | C19 | C18 | 116.4(3) | C54 | C55 | C61 | 117.4(4) |
| C32 | C19 | C20 | 119.7(3) | C56 | C55 | C61 | 119.4(4) |
| C19 | C20 | C21 | 124.2(3) | C57 | C56 | C55 | 122.1(4) |
| C19 | C20 | C33 | 119.4(3) | C56 | C57 | C58 | 120.3(4) |
| C33 | C20 | C21 | 116.4(3) | C59 | C58 | C57 | 121.5(4) |
| C22 | C21 | C20 | 122.2(4) | C59 | C58 | C62 | 118.3(4) |
| C21 | C22 | C23 | 121.7(4) | C62 | C58 | C57 | 120.2(4) |
| C24 | C23 | C22 | 122.5(4) | C60 | C59 | C58 | 120.2(4) |
| C24 | C23 | C34 | 119.6(4) | C59 | C60 | C47 | 122.4(3) |
| C34 | C23 | C22 | 117.9(4) | C51 | C61 | C55 | 120.7(3) |
| C25 | C24 | C23 | 120.6(4) | C51 | C61 | C62 | 120.6(4) |

## Supplementary Information

|     |     |     |          |      |      |      |           |
|-----|-----|-----|----------|------|------|------|-----------|
| C26 | C25 | C24 | 120.5(4) | C62  | C61  | C55  | 118.6(4)  |
| C25 | C26 | C27 | 121.4(4) | C48  | C62  | C61  | 118.9(3)  |
| C26 | C27 | C28 | 122.9(4) | C58  | C62  | C48  | 121.8(3)  |
| C26 | C27 | C34 | 119.0(4) | C58  | C62  | C61  | 119.3(4)  |
| C34 | C27 | C28 | 118.1(4) | Cl2A | C63A | Cl1A | 104.9(17) |

**Supplementary Table 18. Torsion Angles for Py-TDPP.**

| A  | B   | C   | D   | Angle/°   | A   | B   | C   | D   | Angle/°   |
|----|-----|-----|-----|-----------|-----|-----|-----|-----|-----------|
| S1 | C15 | C16 | C17 | 0.9(4)    | C24 | C23 | C34 | C33 | -179.6(4) |
| S1 | C18 | C19 | C20 | 42.6(4)   | C24 | C25 | C26 | C27 | 0.9(8)    |
| S1 | C18 | C19 | C32 | -137.7(3) | C25 | C26 | C27 | C28 | 178.5(4)  |
| S2 | C43 | C44 | C45 | -2.5(4)   | C25 | C26 | C27 | C34 | -0.9(7)   |
| S2 | C46 | C47 | C48 | 144.6(3)  | C26 | C27 | C28 | C29 | 180.0(4)  |
| S2 | C46 | C47 | C60 | -35.9(4)  | C26 | C27 | C34 | C23 | 0.5(6)    |
| O1 | C1  | C2  | C3  | -3.7(8)   | C26 | C27 | C34 | C33 | 180.0(4)  |
| O1 | C1  | C2  | C5  | 179.7(4)  | C27 | C28 | C29 | C30 | -0.5(6)   |
| O2 | C4  | C5  | C2  | 174.4(4)  | C28 | C27 | C34 | C23 | -178.9(4) |
| O2 | C4  | C5  | C6  | -6.8(8)   | C28 | C27 | C34 | C33 | 0.6(6)    |
| N1 | C1  | C2  | C3  | 176.1(4)  | C28 | C29 | C30 | C31 | -178.6(4) |
| N1 | C1  | C2  | C5  | -0.5(4)   | C28 | C29 | C30 | C33 | 1.7(6)    |
| N1 | C6  | C43 | S2  | -6.8(5)   | C29 | C30 | C31 | C32 | -179.0(3) |
| N1 | C6  | C43 | C44 | 177.7(3)  | C29 | C30 | C33 | C20 | 179.1(3)  |
| N1 | C7  | C8  | C9  | -161.2(3) | C29 | C30 | C33 | C34 | -1.7(5)   |
| N1 | C7  | C8  | C13 | 71.5(4)   | C30 | C31 | C32 | C19 | 0.8(5)    |
| N2 | C3  | C15 | S1  | 6.1(5)    | C30 | C33 | C34 | C23 | -179.9(3) |
| N2 | C3  | C15 | C16 | -178.1(3) | C30 | C33 | C34 | C27 | 0.6(5)    |
| N2 | C4  | C5  | C2  | -3.8(4)   | C31 | C30 | C33 | C20 | -0.7(5)   |
| N2 | C4  | C5  | C6  | 175.0(5)  | C31 | C30 | C33 | C34 | 178.6(3)  |
| N2 | C35 | C36 | C37 | -67.3(4)  | C32 | C19 | C20 | C21 | -174.7(3) |
| N2 | C35 | C36 | C41 | 165.4(3)  | C32 | C19 | C20 | C33 | 2.6(5)    |
| C1 | N1  | C6  | C5  | 1.9(4)    | C33 | C20 | C21 | C22 | 4.3(6)    |
| C1 | N1  | C6  | C43 | -175.6(3) | C33 | C30 | C31 | C32 | 0.8(5)    |
| C1 | N1  | C7  | C8  | -101.7(4) | C34 | C23 | C24 | C25 | 0.0(7)    |
| C1 | C2  | C3  | N2  | -177.6(4) | C34 | C27 | C28 | C29 | -0.7(6)   |
| C1 | C2  | C3  | C15 | 1.6(7)    | C35 | N2  | C3  | C2  | 172.5(3)  |
| C1 | C2  | C5  | C4  | -179.1(3) | C35 | N2  | C3  | C15 | -6.8(6)   |
| C1 | C2  | C5  | C6  | 1.7(4)    | C35 | N2  | C4  | O2  | 10.3(5)   |
| C2 | C3  | C15 | S1  | -173.0(3) | C35 | N2  | C4  | C5  | -171.3(3) |
| C2 | C3  | C15 | C16 | 2.8(6)    | C35 | C36 | C37 | C38 | -67.4(4)  |
| C2 | C5  | C6  | N1  | -2.2(4)   | C35 | C36 | C41 | C42 | -175.3(3) |

## Supplementary Information

---

|     |     |     |     |           |     |     |     |     |           |
|-----|-----|-----|-----|-----------|-----|-----|-----|-----|-----------|
| C2  | C5  | C6  | C43 | 175.3(3)  | C36 | C37 | C38 | C39 | 176.9(4)  |
| C3  | N2  | C4  | O2  | -175.2(3) | C37 | C36 | C41 | C42 | 58.0(5)   |
| C3  | N2  | C4  | C5  | 3.3(4)    | C37 | C38 | C39 | C40 | -66.9(5)  |
| C3  | N2  | C35 | C36 | -77.0(4)  | C41 | C36 | C37 | C38 | 57.5(5)   |
| C3  | C2  | C5  | C4  | 3.1(4)    | C43 | S2  | C46 | C45 | -2.0(3)   |
| C3  | C2  | C5  | C6  | -176.1(3) | C43 | S2  | C46 | C47 | 173.6(3)  |
| C3  | C15 | C16 | C17 | -175.4(3) | C43 | C44 | C45 | C46 | 1.1(5)    |
| C4  | N2  | C3  | C2  | -1.5(4)   | C44 | C45 | C46 | S2  | 0.9(4)    |
| C4  | N2  | C3  | C15 | 179.3(3)  | C44 | C45 | C46 | C47 | -173.9(4) |
| C4  | N2  | C35 | C36 | 96.6(4)   | C45 | C46 | C47 | C48 | -41.0(6)  |
| C4  | C5  | C6  | N1  | 179.0(5)  | C45 | C46 | C47 | C60 | 138.5(4)  |
| C4  | C5  | C6  | C43 | -3.4(7)   | C46 | S2  | C43 | C6  | -173.6(3) |
| C5  | C2  | C3  | N2  | -1.0(4)   | C46 | S2  | C43 | C44 | 2.6(3)    |
| C5  | C2  | C3  | C15 | 178.2(3)  | C46 | C47 | C48 | C49 | -6.4(6)   |
| C5  | C6  | C43 | S2  | 176.2(3)  | C46 | C47 | C48 | C62 | 177.1(3)  |
| C5  | C6  | C43 | C44 | 0.6(6)    | C46 | C47 | C60 | C59 | -177.6(4) |
| C6  | N1  | C1  | O1  | 179.0(3)  | C47 | C48 | C49 | C50 | 179.8(4)  |
| C6  | N1  | C1  | C2  | -0.8(4)   | C47 | C48 | C62 | C58 | 1.0(5)    |
| C6  | N1  | C7  | C8  | 75.2(4)   | C47 | C48 | C62 | C61 | -179.1(3) |
| C6  | C43 | C44 | C45 | 173.6(3)  | C48 | C47 | C60 | C59 | 2.0(6)    |
| C7  | N1  | C1  | O1  | -3.7(5)   | C48 | C49 | C50 | C51 | 1.0(6)    |
| C7  | N1  | C1  | C2  | 176.5(3)  | C49 | C48 | C62 | C58 | -175.7(3) |
| C7  | N1  | C6  | C5  | -175.2(3) | C49 | C48 | C62 | C61 | 4.1(5)    |
| C7  | N1  | C6  | C43 | 7.3(6)    | C49 | C50 | C51 | C52 | 180.0(4)  |
| C7  | C8  | C9  | C10 | 167.0(3)  | C49 | C50 | C51 | C61 | 1.2(6)    |
| C7  | C8  | C13 | C14 | 67.5(4)   | C50 | C51 | C52 | C53 | -177.9(4) |
| C8  | C9  | C10 | C11 | -169.3(5) | C50 | C51 | C61 | C55 | 177.6(3)  |
| C9  | C8  | C13 | C14 | -56.8(5)  | C50 | C51 | C61 | C62 | -0.6(5)   |
| C9  | C10 | C11 | C12 | 175.9(6)  | C51 | C52 | C53 | C54 | -0.7(7)   |
| C13 | C8  | C9  | C10 | -66.6(4)  | C51 | C61 | C62 | C48 | -2.0(5)   |
| C15 | S1  | C18 | C17 | 2.2(3)    | C51 | C61 | C62 | C58 | 177.8(3)  |
| C15 | S1  | C18 | C19 | 178.8(3)  | C52 | C51 | C61 | C55 | -1.3(5)   |
| C15 | C16 | C17 | C18 | 0.8(4)    | C52 | C51 | C61 | C62 | -179.5(4) |
| C16 | C17 | C18 | S1  | -2.1(4)   | C52 | C53 | C54 | C55 | 0.8(7)    |
| C16 | C17 | C18 | C19 | -178.4(3) | C53 | C54 | C55 | C56 | 178.9(4)  |
| C17 | C18 | C19 | C20 | -141.5(4) | C53 | C54 | C55 | C61 | -1.2(6)   |
| C17 | C18 | C19 | C32 | 38.2(5)   | C54 | C55 | C56 | C57 | -178.3(4) |
| C18 | S1  | C15 | C3  | 174.6(3)  | C54 | C55 | C61 | C51 | 1.4(5)    |
| C18 | S1  | C15 | C16 | -1.8(3)   | C54 | C55 | C61 | C62 | 179.6(4)  |
| C18 | C19 | C20 | C21 | 5.1(5)    | C55 | C56 | C57 | C58 | -2.0(6)   |

## Supplementary Information

|     |     |     |     |           |     |     |     |     |           |
|-----|-----|-----|-----|-----------|-----|-----|-----|-----|-----------|
| C18 | C19 | C20 | C33 | -177.7(3) | C55 | C61 | C62 | C48 | 179.8(3)  |
| C18 | C19 | C32 | C31 | 177.7(3)  | C55 | C61 | C62 | C58 | -0.4(5)   |
| C19 | C20 | C21 | C22 | -178.4(4) | C56 | C55 | C61 | C51 | -178.6(4) |
| C19 | C20 | C33 | C30 | -1.0(5)   | C56 | C55 | C61 | C62 | -0.4(5)   |
| C19 | C20 | C33 | C34 | 179.8(3)  | C56 | C57 | C58 | C59 | -179.9(4) |
| C20 | C19 | C32 | C31 | -2.5(5)   | C56 | C57 | C58 | C62 | 1.1(6)    |
| C20 | C21 | C22 | C23 | -2.2(6)   | C57 | C58 | C59 | C60 | 179.5(4)  |
| C20 | C33 | C34 | C23 | -0.7(6)   | C57 | C58 | C62 | C48 | 179.9(3)  |
| C20 | C33 | C34 | C27 | 179.8(3)  | C57 | C58 | C62 | C61 | 0.1(5)    |
| C21 | C20 | C33 | C30 | 176.5(3)  | C58 | C59 | C60 | C47 | 0.1(6)    |
| C21 | C20 | C33 | C34 | -2.8(5)   | C59 | C58 | C62 | C48 | 1.0(5)    |
| C21 | C22 | C23 | C24 | -179.0(4) | C59 | C58 | C62 | C61 | -178.9(3) |
| C21 | C22 | C23 | C34 | -1.4(6)   | C60 | C47 | C48 | C49 | 174.1(3)  |
| C22 | C23 | C24 | C25 | 177.5(4)  | C60 | C47 | C48 | C62 | -2.5(5)   |
| C22 | C23 | C34 | C27 | -177.7(4) | C61 | C51 | C52 | C53 | 0.9(6)    |
| C22 | C23 | C34 | C33 | 2.8(6)    | C61 | C55 | C56 | C57 | 1.7(6)    |
| C23 | C24 | C25 | C26 | -0.5(8)   | C62 | C48 | C49 | C50 | -3.7(5)   |
| C24 | C23 | C34 | C27 | 0.0(6)    | C62 | C58 | C59 | C60 | -1.5(6)   |

**Supplementary Table 19.** Hydrogen Atom Coordinates ( $\text{\AA} \times 10^4$ ) and Isotropic Displacement Parameters ( $\text{\AA}^2 \times 10^3$ ) for **Py-TDPP**.

| Atom | x        | y       | z       | U(eq) |
|------|----------|---------|---------|-------|
| H63A | 3440.02  | 7387.83 | 8886.43 | 124   |
| H63B | 3043.78  | 7559.39 | 9711.55 | 124   |
| H7A  | 8975.99  | 6095.71 | 3373.95 | 32    |
| H7B  | 10391.16 | 6558.1  | 3289.01 | 32    |
| H8   | 8284.65  | 7703.24 | 2688.29 | 34    |
| H9A  | 10186.28 | 6476.74 | 1887.95 | 41    |
| H9B  | 8745.19  | 6110.06 | 2234.21 | 41    |
| H10A | 9357.86  | 7758.46 | 1076.72 | 54    |
| H10B | 7880.3   | 7587.94 | 1482.56 | 54    |
| H11A | 9468.02  | 6129.12 | 691.98  | 102   |
| H11B | 8034.13  | 5896.5  | 1136.53 | 102   |
| H12A | 8002.2   | 6391.43 | -124.98 | 136   |
| H12B | 8494     | 7486    | -68.19  | 136   |
| H12C | 7078.2   | 7139.07 | 346.58  | 136   |
| H13A | 9829.54  | 8762.75 | 1972.13 | 38    |
| H13B | 10039.22 | 8694.08 | 2793.34 | 38    |
| H14A | 11686.53 | 7673.18 | 1737.48 | 64    |
| H14B | 11876.64 | 7536.53 | 2567.67 | 64    |

## Supplementary Information

---

|      |          |          |          |     |
|------|----------|----------|----------|-----|
| H14C | 12087.6  | 8620.09  | 2066.86  | 64  |
| H16  | 11800.07 | 8539.5   | 4854.37  | 31  |
| H17  | 13456.86 | 9057.24  | 5478.18  | 31  |
| H21  | 10892.5  | 8681.13  | 7662.67  | 39  |
| H22  | 10335.04 | 8478.52  | 8890.74  | 45  |
| H24  | 10713.62 | 8829.04  | 10097.3  | 57  |
| H25  | 11935.33 | 9582.87  | 10776.49 | 60  |
| H26  | 13696.36 | 10558.28 | 10215.18 | 53  |
| H28  | 15099.42 | 11378.73 | 9079.47  | 45  |
| H29  | 15611.12 | 11639.13 | 7858.82  | 43  |
| H31  | 15252.92 | 11293.4  | 6665.24  | 37  |
| H32  | 14073.28 | 10554.39 | 5956.12  | 35  |
| H35A | 6464.88  | 9490.23  | 6429.12  | 32  |
| H35B | 7910     | 9851.97  | 6427     | 32  |
| H36  | 8438.4   | 8161.77  | 7029.26  | 35  |
| H37A | 6831.54  | 7057.42  | 7577.75  | 38  |
| H37B | 6762.74  | 7282.31  | 6732.91  | 38  |
| H38A | 4939.15  | 8125.49  | 7822.61  | 47  |
| H38B | 4887.89  | 8414.71  | 6975.16  | 47  |
| H39A | 4592.55  | 6382.21  | 7741.23  | 73  |
| H39B | 3370.3   | 7134.54  | 7571.16  | 73  |
| H40A | 4002.28  | 7113.51  | 6325.5   | 101 |
| H40B | 3876.46  | 5962.8   | 6728.24  | 101 |
| H40C | 5295.25  | 6427.96  | 6467.65  | 101 |
| H41A | 7991.7   | 9564.81  | 7663.86  | 43  |
| H41B | 6462.17  | 9336.58  | 7834.01  | 43  |
| H42A | 8367.02  | 7862.69  | 8349.12  | 66  |
| H42B | 6815.52  | 7880.94  | 8626.69  | 66  |
| H42C | 7692.75  | 8709.79  | 8822.45  | 66  |
| H44  | 5100.51  | 7477.77  | 4916.05  | 36  |
| H45  | 3396.34  | 6837.75  | 4372.5   | 38  |
| H49  | 2850.62  | 5208.66  | 4406.19  | 38  |
| H50  | 973.9    | 4307.5   | 4714.02  | 40  |
| H52  | -850.25  | 3470.38  | 4359.32  | 49  |
| H53  | -1807.99 | 2966.63  | 3447.18  | 56  |
| H54  | -942.02  | 3394.52  | 2251.98  | 54  |
| H56  | 791.14   | 4218     | 1290.82  | 51  |
| H57  | 2689.54  | 5060.88  | 966.14   | 47  |
| H59  | 4499.39  | 5935.09  | 1316.81  | 42  |
| H60  | 5460.25  | 6469.04  | 2197.28  | 38  |

## Supplementary Information

|      |         |         |          |     |
|------|---------|---------|----------|-----|
| H63C | 2234.69 | 7268.06 | 9629.19  | 124 |
| H63D | 2432.41 | 6489.46 | 10349.65 | 124 |

### 2.7 X-ray crystallographic data for An-TDPP

**Supplementary Table 20.** Crystal data and structure refinement for **An-TDPP**.

| Identification code                         | An-TDPP                                                                      |
|---------------------------------------------|------------------------------------------------------------------------------|
| Empirical formula                           | C <sub>58</sub> H <sub>56</sub> N <sub>2</sub> O <sub>2</sub> S <sub>2</sub> |
| Formula weight                              | 877.16                                                                       |
| Temperature/K                               | 150.00(10)                                                                   |
| Crystal system                              | monoclinic                                                                   |
| Space group                                 | C2/c                                                                         |
| a/Å                                         | 27.4422(14)                                                                  |
| b/Å                                         | 9.1811(3)                                                                    |
| c/Å                                         | 20.1727(9)                                                                   |
| α/°                                         | 90                                                                           |
| β/°                                         | 116.452(4)                                                                   |
| γ/°                                         | 90                                                                           |
| Volume/Å <sup>3</sup>                       | 4550.4(4)                                                                    |
| Z                                           | 4                                                                            |
| ρ <sub>calc</sub> /cm <sup>3</sup>          | 1.280                                                                        |
| μ/mm <sup>-1</sup>                          | 1.419                                                                        |
| F(000)                                      | 1864.0                                                                       |
| Crystal size/mm <sup>3</sup>                | 0.13 × 0.11 × 0.1                                                            |
| Radiation                                   | CuKα (λ = 1.54178)                                                           |
| 2θ range for data collection/°              | 7.196 to 134.122                                                             |
| Index ranges                                | -29 ≤ h ≤ 32, -10 ≤ k ≤ 9, -23 ≤ l ≤ 24                                      |
| Reflections collected                       | 8591                                                                         |
| Independent reflections                     | 4059 [R <sub>int</sub> = 0.0625, R <sub>sigma</sub> = 0.0656]                |
| Data/restraints/parameters                  | 4059/0/291                                                                   |
| Goodness-of-fit on F <sup>2</sup>           | 1.113                                                                        |
| Final R indexes [I ≥ 2σ(I)]                 | R <sub>1</sub> = 0.0963, wR <sub>2</sub> = 0.2655                            |
| Final R indexes [all data]                  | R <sub>1</sub> = 0.1059, wR <sub>2</sub> = 0.2785                            |
| Largest diff. peak/hole / e Å <sup>-3</sup> | 0.85/-0.47                                                                   |

**Supplementary Table 21.** Fractional Atomic Coordinates (×10<sup>4</sup>) and Equivalent Isotropic Displacement Parameters (Å<sup>2</sup>×10<sup>3</sup>) for **An-TDPP**. U<sub>eq</sub>s defined as 1/3 of the trace of the orthogonalised U<sub>ij</sub> tensor.

| Atom | x | y | z | U(eq) |
|------|---|---|---|-------|
|------|---|---|---|-------|

## Supplementary Information

|     |            |            |            |          |
|-----|------------|------------|------------|----------|
| S1  | 4293.0(3)  | 3029.1(11) | 6167.2(5)  | 34.4(4)  |
| O1  | 6134.1(11) | 626(3)     | 6069.3(15) | 39.4(7)  |
| N1  | 5293.7(12) | 1521(3)    | 5895.6(16) | 28.9(7)  |
| C1  | 3606.1(15) | 3396(4)    | 5692.0(19) | 28.3(8)  |
| C2  | 3392.0(15) | 2729(4)    | 5022(2)    | 33.2(9)  |
| C3  | 3770.7(16) | 1929(4)    | 4879(2)    | 32.9(8)  |
| C4  | 4288.9(15) | 1985(4)    | 5444.3(18) | 25.7(7)  |
| C5  | 3312.2(14) | 4348(4)    | 5981.9(18) | 29.0(8)  |
| C6  | 3285.8(16) | 5849(4)    | 5844(2)    | 34.2(9)  |
| C7  | 3591(2)    | 6551(5)    | 5516(2)    | 42.5(10) |
| C8  | 3544(3)    | 8003(5)    | 5379(3)    | 53.4(13) |
| C9  | 3199(2)    | 8873(5)    | 5562(3)    | 54.7(13) |
| C10 | 2897(2)    | 8271(5)    | 5869(2)    | 48.8(12) |
| C11 | 2926.4(18) | 6746(5)    | 6021(2)    | 37.5(9)  |
| C12 | 2614.9(17) | 6099(5)    | 6324(2)    | 38.8(10) |
| C13 | 2655.7(14) | 4636(5)    | 6493.6(18) | 32.5(9)  |
| C14 | 2337.9(16) | 3967(5)    | 6809(2)    | 38.3(10) |
| C15 | 2391.7(18) | 2534(6)    | 6990(2)    | 42.9(10) |
| C16 | 2765.0(18) | 1656(5)    | 6859(2)    | 40.2(10) |
| C17 | 3063.9(17) | 2244(5)    | 6541(2)    | 34.4(8)  |
| C18 | 3018.0(14) | 3726(4)    | 6335.6(18) | 29.0(8)  |
| C19 | 4749.1(14) | 1264(4)    | 5424.8(19) | 25.6(7)  |
| C20 | 5636.3(15) | 617(4)     | 5715.8(19) | 29.3(8)  |
| C21 | 5266.6(14) | -220(4)    | 5082(2)    | 27.8(8)  |
| C22 | 5523.9(14) | 2556(4)    | 6505.4(19) | 29.9(8)  |
| C23 | 5489.5(16) | 4153(4)    | 6241(2)    | 35.7(9)  |
| C24 | 5628.4(19) | 5129(5)    | 6921(2)    | 43.6(10) |
| C25 | 5585(2)    | 6766(5)    | 6791(3)    | 52.6(12) |
| C26 | 5706(2)    | 7619(6)    | 7491(3)    | 59.2(13) |
| C27 | 5654(3)    | 9203(6)    | 7377(4)    | 73.1(17) |
| C28 | 5842.4(18) | 4413(5)    | 5844(2)    | 41.5(10) |
| C29 | 6457(2)    | 4281(6)    | 6322(3)    | 54.6(12) |

**Supplementary Table 22.** Anisotropic Displacement Parameters ( $\text{\AA}^2 \times 10^3$ ) for **An-TDPP**. The Anisotropic displacement factor exponent takes the form:  $-2\pi^2[h^2a^*2U11+2hka^*b^*U12+\dots]$ .

| Atom | U11      | U22      | U33      | U23       | U13      | U12     |
|------|----------|----------|----------|-----------|----------|---------|
| S1   | 31.4(5)  | 40.6(6)  | 27.2(5)  | -12.7(4)  | 9.6(4)   | 4.9(4)  |
| O1   | 29.5(14) | 41.7(17) | 39.1(15) | -18.8(12) | 8.1(11)  | 1.1(11) |
| N1   | 29.2(15) | 25.1(16) | 28.0(15) | -7.1(12)  | 8.6(12)  | 2.0(12) |
| C1   | 34.0(18) | 23.3(18) | 26.6(17) | 1.9(14)   | 12.8(14) | 4.2(14) |

## Supplementary Information

|     |          |          |          |          |          |          |
|-----|----------|----------|----------|----------|----------|----------|
| C2  | 32.1(18) | 32(2)    | 28.5(18) | -3.4(15) | 7.2(15)  | 9.3(15)  |
| C3  | 39(2)    | 27(2)    | 27.4(18) | -8.0(14) | 10.5(15) | 4.8(15)  |
| C4  | 34.9(18) | 17.6(17) | 22.8(16) | -5.1(12) | 11.2(14) | 0.5(13)  |
| C5  | 33.9(17) | 29.1(19) | 21.1(16) | -3.5(14) | 9.6(14)  | 4.8(14)  |
| C6  | 47(2)    | 30(2)    | 24.2(17) | -5.1(14) | 15.0(15) | 3.2(16)  |
| C7  | 61(3)    | 36(2)    | 35(2)    | -0.4(17) | 25.7(19) | 2.4(19)  |
| C8  | 88(4)    | 31(2)    | 45(3)    | -2.0(18) | 34(3)    | -6(2)    |
| C9  | 93(4)    | 24(2)    | 43(2)    | 0.9(18)  | 27(2)    | 6(2)     |
| C10 | 74(3)    | 31(2)    | 37(2)    | -2.9(18) | 21(2)    | 18(2)    |
| C11 | 54(2)    | 30(2)    | 27.4(19) | -3.3(15) | 17.2(17) | 11.6(17) |
| C12 | 48(2)    | 44(2)    | 25.0(17) | -2.9(16) | 16.1(16) | 17.1(18) |
| C13 | 30.5(17) | 43(2)    | 18.7(16) | -6.2(15) | 6.2(13)  | 6.1(15)  |
| C14 | 33.8(18) | 58(3)    | 22.2(17) | -8.9(17) | 11.9(14) | 0.1(18)  |
| C15 | 47(2)    | 60(3)    | 22.8(18) | -3.9(18) | 15.9(16) | -11(2)   |
| C16 | 51(2)    | 39(2)    | 26.4(18) | 1.4(16)  | 14.0(17) | -4.7(18) |
| C17 | 44(2)    | 34(2)    | 22.8(17) | -2.8(15) | 12.5(15) | 1.8(16)  |
| C18 | 31.5(17) | 32(2)    | 18.6(15) | -3.7(14) | 6.3(13)  | 4.9(15)  |
| C19 | 28.9(17) | 20.1(17) | 25.5(16) | -2.1(13) | 10.2(13) | 0.8(13)  |
| C20 | 32.7(18) | 25.3(18) | 27.2(17) | -6.3(14) | 10.9(14) | 2.2(14)  |
| C21 | 29.6(17) | 22.5(17) | 29.3(17) | -4.7(14) | 11.5(13) | 3.6(13)  |
| C22 | 33.2(18) | 26.1(19) | 26.8(17) | -8.1(14) | 10.2(14) | 0.0(14)  |
| C23 | 37.8(19) | 29(2)    | 34(2)    | -5.7(16) | 11.1(16) | 2.3(15)  |
| C24 | 51(2)    | 31(2)    | 44(2)    | -9.8(18) | 16.5(19) | -3.1(18) |
| C25 | 73(3)    | 31(2)    | 49(3)    | -0.1(19) | 22(2)    | 5(2)     |
| C26 | 69(3)    | 54(3)    | 45(3)    | -4(2)    | 16(2)    | 3(3)     |
| C27 | 104(5)   | 45(3)    | 65(3)    | -8(3)    | 33(3)    | -7(3)    |
| C28 | 51(2)    | 38(2)    | 34(2)    | -0.7(17) | 16.8(18) | -1.1(18) |
| C29 | 48(3)    | 63(3)    | 48(3)    | -8(2)    | 16(2)    | -2(2)    |

**Supplementary Table 23.** Bond Lengths for An-TDPP.

| Atom | Atom | Length/Å | Atom | Atom | Length/Å |
|------|------|----------|------|------|----------|
| S1   | C1   | 1.725(4) | C11  | C12  | 1.387(7) |
| S1   | C4   | 1.741(3) | C12  | C13  | 1.378(6) |
| O1   | C20  | 1.228(5) | C13  | C14  | 1.427(6) |
| N1   | C19  | 1.388(4) | C13  | C18  | 1.439(5) |
| N1   | C20  | 1.417(5) | C14  | C15  | 1.356(7) |
| N1   | C22  | 1.458(5) | C15  | C16  | 1.417(7) |
| C1   | C2   | 1.356(5) | C16  | C17  | 1.359(6) |
| C1   | C5   | 1.476(5) | C17  | C18  | 1.411(6) |
| C2   | C3   | 1.404(5) | C19  | C211 | 1.388(5) |



## Supplementary Information

---

|     |     |          |     |      |          |
|-----|-----|----------|-----|------|----------|
| C3  | C4  | 1.371(5) | C20 | C21  | 1.449(5) |
| C4  | C19 | 1.442(5) | C21 | C211 | 1.408(7) |
| C5  | C6  | 1.401(6) | C22 | C23  | 1.548(6) |
| C5  | C18 | 1.414(5) | C23 | C24  | 1.537(6) |
| C6  | C7  | 1.431(6) | C23 | C28  | 1.526(6) |
| C6  | C11 | 1.446(6) | C24 | C25  | 1.521(6) |
| C7  | C8  | 1.356(6) | C25 | C26  | 1.516(7) |
| C8  | C9  | 1.407(8) | C26 | C27  | 1.469(8) |
| C9  | C10 | 1.353(8) | C28 | C29  | 1.530(6) |
| C10 | C11 | 1.428(6) |     |      |          |

---

**Supplementary Table 24.** Bond Angles for **An-TDPP**.

| Atom | Atom | Atom | Angle/°   | Atom | Atom | Atom | Angle/°  |
|------|------|------|-----------|------|------|------|----------|
| C1   | S1   | C4   | 92.54(17) | C12  | C13  | C18  | 119.9(4) |
| C19  | N1   | C20  | 111.1(3)  | C14  | C13  | C18  | 118.0(4) |
| C19  | N1   | C22  | 128.2(3)  | C15  | C14  | C13  | 121.5(4) |
| C20  | N1   | C22  | 120.7(3)  | C14  | C15  | C16  | 120.2(4) |
| C2   | C1   | S1   | 110.3(3)  | C17  | C16  | C15  | 120.0(4) |
| C2   | C1   | C5   | 126.3(3)  | C16  | C17  | C18  | 121.8(4) |
| C5   | C1   | S1   | 123.4(3)  | C5   | C18  | C13  | 118.9(4) |
| C1   | C2   | C3   | 114.2(3)  | C17  | C18  | C5   | 122.7(3) |
| C4   | C3   | C2   | 113.4(3)  | C17  | C18  | C13  | 118.4(4) |
| C3   | C4   | S1   | 109.5(3)  | N1   | C19  | C4   | 126.3(3) |
| C3   | C4   | C19  | 123.8(3)  | N1   | C19  | C211 | 107.0(3) |
| C19  | C4   | S1   | 126.6(3)  | C211 | C19  | C4   | 126.6(3) |
| C6   | C5   | C1   | 119.5(3)  | O1   | C20  | N1   | 122.8(3) |
| C6   | C5   | C18  | 120.4(3)  | O1   | C20  | C21  | 132.6(3) |
| C18  | C5   | C1   | 119.8(3)  | N1   | C20  | C21  | 104.6(3) |
| C5   | C6   | C7   | 123.0(4)  | C191 | C21  | C20  | 142.8(3) |
| C5   | C6   | C11  | 119.5(4)  | C191 | C21  | C211 | 109.7(4) |
| C7   | C6   | C11  | 117.5(4)  | C211 | C21  | C20  | 107.5(4) |
| C8   | C7   | C6   | 121.0(4)  | N1   | C22  | C23  | 113.0(3) |
| C7   | C8   | C9   | 121.3(5)  | C24  | C23  | C22  | 107.0(3) |
| C10  | C9   | C8   | 120.5(4)  | C28  | C23  | C22  | 112.0(3) |
| C9   | C10  | C11  | 120.8(4)  | C28  | C23  | C24  | 114.4(4) |
| C10  | C11  | C6   | 119.0(4)  | C25  | C24  | C23  | 117.0(4) |
| C12  | C11  | C6   | 119.1(4)  | C26  | C25  | C24  | 112.5(4) |
| C12  | C11  | C10  | 121.9(4)  | C27  | C26  | C25  | 113.6(5) |
| C13  | C12  | C11  | 121.9(4)  | C23  | C28  | C29  | 115.9(4) |
| C12  | C13  | C14  | 122.1(4)  |      |      |      |          |

---

**Supplementary Table 25.** Torsion Angles for An-TDPP.

| A  | B   | C   | D    | Angle/°   | A   | B   | C   | D    | Angle/°   |
|----|-----|-----|------|-----------|-----|-----|-----|------|-----------|
| S1 | C1  | C2  | C3   | -0.3(5)   | C8  | C9  | C10 | C11  | 0.7(7)    |
| S1 | C1  | C5  | C6   | 88.3(4)   | C9  | C10 | C11 | C6   | 0.2(7)    |
| S1 | C1  | C5  | C18  | -97.6(4)  | C9  | C10 | C11 | C12  | -179.0(4) |
| S1 | C4  | C19 | N1   | -15.3(5)  | C10 | C11 | C12 | C13  | -177.9(4) |
| S1 | C4  | C19 | C211 | 167.1(3)  | C11 | C6  | C7  | C8   | 0.1(6)    |
| O1 | C20 | C21 | C191 | -2.8(9)   | C11 | C12 | C13 | C14  | 179.7(4)  |
| O1 | C20 | C21 | C211 | 179.2(5)  | C11 | C12 | C13 | C18  | -1.8(6)   |
| N1 | C20 | C21 | C191 | 178.1(5)  | C12 | C13 | C14 | C15  | -178.3(4) |
| N1 | C20 | C21 | C211 | 0.1(5)    | C12 | C13 | C18 | C5   | -2.3(5)   |
| N1 | C22 | C23 | C24  | 168.0(3)  | C12 | C13 | C18 | C17  | 177.8(3)  |
| N1 | C22 | C23 | C28  | -65.9(4)  | C13 | C14 | C15 | C16  | -0.7(6)   |
| C1 | S1  | C4  | C3   | -1.1(3)   | C14 | C13 | C18 | C5   | 176.2(3)  |
| C1 | S1  | C4  | C19  | 179.4(3)  | C14 | C13 | C18 | C17  | -3.7(5)   |
| C1 | C2  | C3  | C4   | -0.6(5)   | C14 | C15 | C16 | C17  | -1.1(6)   |
| C1 | C5  | C6  | C7   | -8.5(6)   | C15 | C16 | C17 | C18  | 0.5(6)    |
| C1 | C5  | C6  | C11  | 170.0(3)  | C16 | C17 | C18 | C5   | -177.9(4) |
| C1 | C5  | C18 | C13  | -168.8(3) | C16 | C17 | C18 | C13  | 2.0(5)    |
| C1 | C5  | C18 | C17  | 11.1(5)   | C18 | C5  | C6  | C7   | 177.4(3)  |
| C2 | C1  | C5  | C6   | -89.5(5)  | C18 | C5  | C6  | C11  | -4.2(5)   |
| C2 | C1  | C5  | C18  | 84.7(5)   | C18 | C13 | C14 | C15  | 3.2(5)    |
| C2 | C3  | C4  | S1   | 1.1(4)    | C19 | N1  | C20 | O1   | -178.1(4) |
| C2 | C3  | C4  | C19  | -179.4(4) | C19 | N1  | C20 | C21  | 1.1(4)    |
| C3 | C4  | C19 | N1   | 165.3(4)  | C19 | N1  | C22 | C23  | -74.1(5)  |
| C3 | C4  | C19 | C211 | -12.3(6)  | C20 | N1  | C19 | C4   | -179.9(3) |
| C4 | S1  | C1  | C2   | 0.8(3)    | C20 | N1  | C19 | C211 | -1.9(4)   |
| C4 | S1  | C1  | C5   | -177.3(3) | C20 | N1  | C22 | C23  | 105.6(4)  |
| C5 | C1  | C2  | C3   | 177.7(4)  | C22 | N1  | C19 | C4   | -0.1(6)   |
| C5 | C6  | C7  | C8   | 178.6(4)  | C22 | N1  | C19 | C211 | 177.9(4)  |
| C5 | C6  | C11 | C10  | -179.1(4) | C22 | N1  | C20 | O1   | 2.2(6)    |
| C5 | C6  | C11 | C12  | 0.0(6)    | C22 | N1  | C20 | C21  | -178.7(3) |
| C6 | C5  | C18 | C13  | 5.3(5)    | C22 | C23 | C24 | C25  | -176.0(4) |
| C6 | C5  | C18 | C17  | -174.8(3) | C22 | C23 | C28 | C29  | -66.2(5)  |
| C6 | C7  | C8  | C9   | 0.8(8)    | C23 | C24 | C25 | C26  | 177.4(4)  |
| C6 | C11 | C12 | C13  | 3.0(6)    | C24 | C23 | C28 | C29  | 55.7(5)   |
| C7 | C6  | C11 | C10  | -0.6(6)   | C24 | C25 | C26 | C27  | -178.7(5) |
| C7 | C6  | C11 | C12  | 178.6(4)  | C28 | C23 | C24 | C25  | 59.4(5)   |
| C7 | C8  | C9  | C10  | -1.2(8)   |     |     |     |      |           |

## Supplementary Information

**Supplementary Table 26.** Hydrogen Atom Coordinates ( $\text{\AA} \times 10^4$ ) and Isotropic Displacement Parameters ( $\text{\AA}^2 \times 10^3$ ) for **An-TDPP**.

| Atom | x       | y       | z       | U(eq) |
|------|---------|---------|---------|-------|
| H2   | 3018.17 | 2797.55 | 4679.62 | 40    |
| H3   | 3677.09 | 1399.69 | 4434.19 | 39    |
| H7   | 3830.25 | 5990.92 | 5392.85 | 51    |
| H8   | 3747.62 | 8441.45 | 5155.84 | 64    |
| H9   | 3178.07 | 9891.18 | 5469.65 | 66    |
| H10  | 2663.14 | 8870.24 | 5984.42 | 59    |
| H12  | 2366.21 | 6680.73 | 6418.37 | 47    |
| H14  | 2082.8  | 4539.09 | 6893.91 | 46    |
| H15  | 2178.39 | 2116.77 | 7204.2  | 51    |
| H16  | 2806.46 | 656.76  | 6995.01 | 48    |
| H17  | 3310.57 | 1640.3  | 6453.31 | 41    |
| H22A | 5910.07 | 2304.24 | 6819.46 | 36    |
| H22B | 5327.95 | 2470.07 | 6813.75 | 36    |
| H23  | 5103.03 | 4350.42 | 5880.32 | 43    |
| H24A | 5384.93 | 4857.33 | 7144.18 | 52    |
| H24B | 6005.34 | 4904.99 | 7289.31 | 52    |
| H25A | 5843.41 | 7065.32 | 6596.78 | 63    |
| H25B | 5212.9  | 7005.45 | 6411.76 | 63    |
| H26A | 5452.91 | 7297.01 | 7690.7  | 71    |
| H26B | 6080.37 | 7390.67 | 7865.21 | 71    |
| H27A | 5284.77 | 9439.34 | 7005.38 | 110   |
| H27B | 5917.29 | 9539.69 | 7204.87 | 110   |
| H27C | 5726.72 | 9685.73 | 7845.07 | 110   |
| H28A | 5763.6  | 5401.93 | 5625.24 | 50    |
| H28B | 5732.94 | 3709.26 | 5430.78 | 50    |
| H29A | 6647.62 | 4581.71 | 6032.48 | 82    |
| H29B | 6549.71 | 3267.58 | 6480.51 | 82    |
| H29C | 6568.48 | 4909.09 | 6757.74 | 82    |

### 2.8. X-ray crystallographic data for Flu-TDPP

**Supplementary Table 27.** Crystal data and structure refinement for **Flu-TDPP**.

|                     |                                                            |
|---------------------|------------------------------------------------------------|
| Identification code | <b>Flu-TDPP</b>                                            |
| Empirical formula   | $\text{C}_{60}\text{H}_{64}\text{N}_2\text{O}_2\text{S}_2$ |
| Formula weight      | 909.25                                                     |
| Temperature/K       | 149.99(10)                                                 |

## Supplementary Information

---

|                                             |                                                               |
|---------------------------------------------|---------------------------------------------------------------|
| Crystal system                              | monoclinic                                                    |
| Space group                                 | P2 <sub>1</sub> /c                                            |
| a/Å                                         | 11.97270(10)                                                  |
| b/Å                                         | 14.9060(2)                                                    |
| c/Å                                         | 27.9247(3)                                                    |
| $\alpha$ /°                                 | 90                                                            |
| $\beta$ /°                                  | 98.8940(10)                                                   |
| $\gamma$ /°                                 | 90                                                            |
| Volume/Å <sup>3</sup>                       | 4923.66(10)                                                   |
| Z                                           | 4                                                             |
| $\rho_{\text{calc}}/\text{cm}^3$            | 1.227                                                         |
| $\mu/\text{mm}^{-1}$                        | 1.327                                                         |
| F(000)                                      | 1944.0                                                        |
| Crystal size/mm <sup>3</sup>                | 0.1 × 0.05 × 0.02                                             |
| Radiation                                   | CuK $\alpha$ ( $\lambda$ = 1.54184)                           |
| 2 $\Theta$ range for data collection/°      | 6.408 to 147.462                                              |
| Index ranges                                | -14 ≤ h ≤ 7, -18 ≤ k ≤ 18, -34 ≤ l ≤ 34                       |
| Reflections collected                       | 52024                                                         |
| Independent reflections                     | 9658 [R <sub>int</sub> = 0.0384, R <sub>sigma</sub> = 0.0284] |
| Data/restraints/parameters                  | 9658/262/660                                                  |
| Goodness-of-fit on F <sup>2</sup>           | 1.036                                                         |
| Final R indexes [I ≥ 2 $\sigma$ (I)]        | R <sub>1</sub> = 0.0729, wR <sub>2</sub> = 0.2080             |
| Final R indexes [all data]                  | R <sub>1</sub> = 0.0872, wR <sub>2</sub> = 0.2213             |
| Largest diff. peak/hole / e Å <sup>-3</sup> | 1.29/-0.66                                                    |

---

**Supplementary Table 28.** Fractional Atomic Coordinates ( $\times 10^4$ ) and Equivalent Isotropic Displacement Parameters ( $\text{\AA}^2 \times 10^3$ ) for **Flu-TDPP**.  $U_{\text{eq}}$  is defined as 1/3 of the trace of the orthogonalised  $U_{ij}$  tensor.

## Supplementary Information

| Atom | <i>x</i>   | <i>y</i>   | <i>z</i>   | U(eq)    |
|------|------------|------------|------------|----------|
| S1   | 4601.9(6)  | 6053.6(5)  | 3863.1(3)  | 47.6(2)  |
| S2   | 10361.3(6) | 3764.1(5)  | 6071.5(3)  | 45.9(2)  |
| O1   | 8790.9(18) | 6611.2(15) | 5030.1(9)  | 55.1(6)  |
| O2   | 6220.1(17) | 3216.0(14) | 4900.2(8)  | 47.0(5)  |
| N1   | 7048(2)    | 6160.1(17) | 4612.1(10) | 46.4(6)  |
| N2   | 7964.4(19) | 3667.8(16) | 5315.3(8)  | 40.2(5)  |
| C1   | 6381(2)    | 5387(2)    | 4565.9(10) | 41.7(6)  |
| C01B | 6596(3)    | 7902(2)    | 5157.5(12) | 55.3(8)  |
| C2   | 6988(2)    | 4733.4(19) | 4846.7(10) | 38.8(6)  |
| C3   | 6930(2)    | 3809(2)    | 4996.5(10) | 40.1(6)  |
| C4   | 8613(2)    | 4449.1(19) | 5370.7(10) | 38.2(6)  |
| C5   | 8017(2)    | 5095(2)    | 5078.9(10) | 39.7(6)  |
| C6   | 8078(2)    | 6020(2)    | 4930.8(11) | 46.8(7)  |
| C7   | 6795(3)    | 7039(2)    | 4388.2(11) | 46.0(7)  |
| C8   | 6022(3)    | 7608(2)    | 4651.7(12) | 49.4(7)  |
| C9   | 5556(3)    | 8396(2)    | 4332.0(12) | 50.8(7)  |
| C10  | 4697(3)    | 8966(2)    | 4529.5(13) | 57.2(8)  |
| C11  | 4184(3)    | 9718(3)    | 4185.5(13) | 64.9(10) |
| C12  | 3542(4)    | 9378(3)    | 3711.3(14) | 73.5(11) |
| C13  | 7558(3)    | 8594(3)    | 5159.5(14) | 65.5(10) |
| C14  | 5264(2)    | 5298(2)    | 4289.3(10) | 41.8(6)  |
| C15  | 4570(2)    | 4575(2)    | 4321.8(11) | 44.2(6)  |
| C16  | 3533(2)    | 4627(2)    | 4013.0(11) | 45.1(7)  |
| C17  | 3406(2)    | 5389.1(19) | 3736.5(10) | 41.4(6)  |
| C18  | 2454(2)    | 5652.3(19) | 3369.5(10) | 40.0(6)  |
| C19  | 1504(2)    | 5093(2)    | 3271.8(11) | 45.1(7)  |

## Supplementary Information

---

|      |           |            |            |          |
|------|-----------|------------|------------|----------|
| C20  | 599(2)    | 5307(2)    | 2916.2(11) | 45.1(7)  |
| C21  | 635(2)    | 6088.4(19) | 2649.8(10) | 39.3(6)  |
| C22  | 1571(2)   | 6659.0(19) | 2742.8(11) | 40.7(6)  |
| C23  | 2472(2)   | 6447(2)    | 3100.4(11) | 43.1(6)  |
| C24  | -147(2)   | 6461(2)    | 2242.3(10) | 40.3(6)  |
| C25  | 327(2)    | 7245(2)    | 2086.8(11) | 41.9(6)  |
| C26  | 1458(2)   | 7450(2)    | 2398.8(11) | 45.3(7)  |
| C27  | -1190(3)  | 6155(2)    | 2007.6(11) | 48.6(7)  |
| C28  | -1728(3)  | 6628(2)    | 1608.2(12) | 53.8(8)  |
| C29  | -1234(3)  | 7392(2)    | 1445.9(12) | 52.8(8)  |
| C30  | -215(3)   | 7711(2)    | 1686.0(11) | 47.6(7)  |
| C31  | 1421(3)   | 8340(2)    | 2667.0(15) | 67.6(11) |
| C32  | 2413(3)   | 7455(3)    | 2092.1(14) | 63.6(10) |
| C33  | 8180(3)   | 2808(2)    | 5559.9(12) | 46.7(7)  |
| C34  | 8968(3)   | 2170(2)    | 5352.8(15) | 67.9(10) |
| C35  | 9199(15)  | 1232(7)    | 5581(4)    | 101(2)   |
| C35A | 9198(8)   | 1439(6)    | 5762(4)    | 99.0(19) |
| C36  | 9780(11)  | 1362(7)    | 6101(5)    | 98(2)    |
| C36A | 10388(6)  | 1048(5)    | 5850(3)    | 89(2)    |
| C37  | 9888(12)  | 429(9)     | 6343(5)    | 127(3)   |
| C37A | 10669(8)  | 290(7)     | 6202(5)    | 119(2)   |
| C38  | 11086(14) | 44(12)     | 6364(9)    | 146(4)   |
| C38A | 11912(7)  | -85(7)     | 6193(5)    | 141(3)   |
| C39  | 8159(10)  | 1899(10)   | 4866(3)    | 104(3)   |
| C39A | 8564(5)   | 1856(6)    | 4840(3)    | 84.4(18) |
| C40  | 8696(7)   | 2334(5)    | 4499(3)    | 56(2)    |
| C40A | 9278(7)   | 1584(8)    | 4463(4)    | 122(3)   |

## Supplementary Information

|     |          |         |            |          |
|-----|----------|---------|------------|----------|
| C41 | 9678(2)  | 4568(2) | 5685.1(10) | 40.7(6)  |
| C42 | 10279(2) | 5364(2) | 5730.1(11) | 43.9(6)  |
| C43 | 11267(2) | 5314(2) | 6070.4(11) | 44.3(6)  |
| C44 | 11435(2) | 4493(2) | 6292.5(11) | 44.2(6)  |
| C45 | 12318(2) | 4208(2) | 6688.1(11) | 45.4(7)  |
| C46 | 12982(3) | 4846(2) | 6963.7(12) | 52.8(8)  |
| C47 | 13739(3) | 4601(2) | 7368.6(13) | 56.3(8)  |
| C48 | 13849(2) | 3706(2) | 7498.0(11) | 48.3(7)  |
| C49 | 13230(2) | 3051(2) | 7213.7(11) | 45.9(7)  |
| C50 | 12462(2) | 3300(2) | 6814.5(11) | 44.3(6)  |
| C51 | 14504(3) | 3258(3) | 7918.3(12) | 53.9(8)  |
| C52 | 14304(3) | 2335(3) | 7875.9(12) | 54.1(8)  |
| C53 | 13508(3) | 2116(2) | 7408.9(12) | 51.2(8)  |
| C54 | 15199(3) | 3609(3) | 8320.9(13) | 64.1(10) |
| C55 | 15673(3) | 3020(4) | 8682.3(14) | 74.5(12) |
| C56 | 15479(3) | 2109(4) | 8638.4(14) | 77.4(13) |
| C57 | 14803(3) | 1758(3) | 8237.8(13) | 66.1(10) |
| C58 | 12468(3) | 1593(3) | 7497.8(14) | 60.1(9)  |
| C59 | 14138(3) | 1598(3) | 7055.5(13) | 68.6(11) |

**Supplementary Table 29.** Anisotropic Displacement Parameters ( $\text{\AA}^2 \times 10^3$ ) for **Flu-TDPP**. The Anisotropic displacement factor exponent takes the form:  $-2\pi^2[h^2a^*2U_{11}+2hka^*b^*U_{12}+\dots]$ .

| Atom | $U_{11}$ | $U_{22}$ | $U_{33}$ | $U_{23}$ | $U_{13}$ | $U_{12}$ |
|------|----------|----------|----------|----------|----------|----------|
| S1   | 36.2(4)  | 46.0(4)  | 55.2(4)  | 7.0(3)   | -9.9(3)  | -1.6(3)  |
| S2   | 37.2(4)  | 45.9(4)  | 50.1(4)  | -0.6(3)  | -7.2(3)  | 4.1(3)   |
| O1   | 41.8(12) | 52.5(13) | 67.2(14) | 7.7(11)  | -3.8(10) | -4.0(10) |
| O2   | 37.3(11) | 48.2(12) | 52.6(12) | 4.2(9)   | -2.3(9)  | -2.7(9)  |
| N1   | 38.3(13) | 45.1(14) | 52.5(14) | 6.6(11)  | -4.2(11) | -0.4(10) |

## Supplementary Information

---

|            |          |          |          |           |           |          |
|------------|----------|----------|----------|-----------|-----------|----------|
| N2         | 34.4(12) | 42.5(13) | 41.5(12) | 2.9(10)   | -0.9(9)   | 1.6(9)   |
| C1         | 32.8(14) | 47.4(16) | 42.9(14) | 1.1(12)   | -0.8(11)  | -0.2(11) |
| C01B 55(2) |          | 63(2)    | 46.9(17) | 1.2(15)   | 5.4(14)   | 6.1(15)  |
| C2         | 31.9(14) | 45.4(15) | 37.9(13) | 0.5(11)   | 2.0(10)   | -0.3(11) |
| C3         | 33.9(14) | 45.6(15) | 39.8(14) | 0.1(11)   | 3.0(11)   | 1.3(11)  |
| C4         | 33.0(14) | 44.9(15) | 36.3(13) | -0.1(11)  | 4.4(10)   | 1.8(11)  |
| C5         | 30.7(14) | 46.9(15) | 40.3(14) | 2.6(12)   | 1.7(11)   | -0.7(11) |
| C6         | 36.4(15) | 49.7(17) | 50.1(17) | 2.6(13)   | -6.0(12)  | -0.6(12) |
| C7         | 40.3(16) | 50.3(17) | 46.8(16) | 5.0(13)   | 4.6(12)   | 1.0(12)  |
| C8         | 39.2(16) | 53.1(18) | 55.0(18) | -6.1(14)  | 4.3(13)   | 1.5(13)  |
| C9         | 47.3(17) | 52.5(18) | 48.9(17) | -0.8(14)  | -4.4(13)  | -1.9(14) |
| C10        | 56(2)    | 58(2)    | 54.5(19) | -8.6(15)  | 0.1(15)   | 3.5(15)  |
| C11        | 69(2)    | 59(2)    | 61(2)    | -10.6(17) | -4.3(17)  | 16.3(18) |
| C12        | 75(3)    | 78(3)    | 61(2)    | -3.3(19)  | -11.8(19) | 26(2)    |
| C13        | 59(2)    | 70(2)    | 63(2)    | -15.2(18) | -6.7(17)  | 1.2(18)  |
| C14        | 33.8(14) | 46.7(15) | 42.4(15) | 0.2(12)   | -1.6(11)  | 3.8(11)  |
| C15        | 38.2(15) | 46.4(16) | 45.5(15) | 2.7(12)   | -1.2(12)  | 0.7(12)  |
| C16        | 38.6(15) | 47.2(16) | 47.1(16) | 0.1(13)   | -0.9(12)  | -2.8(12) |
| C17        | 36.6(15) | 42.1(15) | 44.0(15) | -3.0(12)  | 0.9(11)   | 3.1(11)  |
| C18        | 31.8(14) | 43.1(15) | 43.3(14) | -4.1(12)  | 0.2(11)   | 1.9(11)  |
| C19        | 40.0(16) | 45.7(16) | 47.2(16) | 1.7(13)   | -0.5(12)  | -3.5(12) |
| C20        | 36.0(15) | 48.2(16) | 48.9(16) | -0.9(13)  | 0.2(12)   | -7.1(12) |
| C21        | 30.1(13) | 46.7(15) | 40.1(14) | -4.7(12)  | 1.8(10)   | -0.3(11) |
| C22        | 32.1(14) | 41.6(15) | 46.0(15) | -2.2(12)  | -1.0(11)  | 1.5(11)  |
| C23        | 30.4(14) | 42.8(15) | 52.7(16) | -0.7(13)  | -4.1(12)  | -1.9(11) |
| C24        | 31.2(14) | 48.4(16) | 40.1(14) | -4.8(12)  | 1.4(11)   | 0.0(11)  |
| C25        | 31.4(14) | 48.1(16) | 44.8(15) | -3.9(12)  | 1.2(11)   | 4.0(11)  |



## Supplementary Information

---

|      |          |          |          |          |           |          |
|------|----------|----------|----------|----------|-----------|----------|
| C26  | 33.1(15) | 45.0(16) | 53.7(17) | 4.0(13)  | -6.4(12)  | -1.5(11) |
| C27  | 37.2(16) | 56.8(18) | 48.5(16) | -3.0(14) | -3.3(12)  | -6.1(13) |
| C28  | 38.2(16) | 65(2)    | 53.5(18) | -7.9(15) | -8.6(13)  | -2.2(14) |
| C29  | 45.8(18) | 61(2)    | 47.7(17) | -1.2(14) | -6.4(13)  | 5.9(14)  |
| C30  | 38.4(16) | 51.4(17) | 50.6(17) | 3.7(13)  | -0.6(12)  | 2.6(13)  |
| C31  | 68(2)    | 45.5(18) | 77(2)    | -4.3(17) | -27.1(19) | 1.8(16)  |
| C32  | 35.2(17) | 79(2)    | 75(2)    | 23.4(19) | 4.1(15)   | -3.1(15) |
| C33  | 39.5(16) | 44.4(16) | 54.2(17) | 6.1(13)  | 0.3(13)   | -0.1(12) |
| C34  | 46.5(19) | 48.8(19) | 108(3)   | -6.3(19) | 11.7(19)  | 1.0(15)  |
| C35  | 73(4)    | 69(4)    | 165(5)   | -2(4)    | 28(4)     | 14(4)    |
| C35A | 74(3)    | 70(3)    | 161(5)   | 16(3)    | 44(4)     | 17(3)    |
| C36  | 63(4)    | 77(4)    | 158(5)   | 4(4)     | 26(4)     | 10(4)    |
| C36A | 105(5)   | 77(5)    | 83(5)    | 14(4)    | 3(4)      | -7(4)    |
| C37  | 98(5)    | 101(5)   | 181(6)   | 20(5)    | 22(5)     | 12(5)    |
| C37A | 94(4)    | 93(4)    | 175(5)   | 33(4)    | 35(4)     | 27(4)    |
| C38  | 111(7)   | 124(8)   | 199(9)   | 22(7)    | 14(8)     | 18(7)    |
| C38A | 70(5)    | 117(6)   | 229(9)   | 69(6)    | 1(6)      | -7(4)    |
| C39  | 72(5)    | 92(5)    | 150(5)   | -23(4)   | 25(4)     | 6(5)     |
| C39A | 28(3)    | 85(4)    | 144(4)   | -61(3)   | 25(3)     | -9(3)    |
| C40  | 40(4)    | 40(4)    | 76(5)    | -18(4)   | -27(4)    | -2(3)    |
| C40A | 72(5)    | 155(7)   | 139(6)   | -75(6)   | 13(4)     | 12(5)    |
| C41  | 33.4(14) | 47.0(15) | 40.3(14) | -0.7(12) | 1.6(11)   | 3.3(11)  |
| C42  | 36.2(15) | 49.4(16) | 44.6(15) | 1.4(13)  | 1.1(11)   | 2.9(12)  |
| C43  | 34.1(14) | 50.8(17) | 46.1(15) | -0.3(13) | 0.6(11)   | 0.7(12)  |
| C44  | 36.7(15) | 48.3(16) | 45.6(15) | -4.5(13) | -0.3(12)  | 5.0(12)  |
| C45  | 35.7(15) | 51.1(17) | 46.6(16) | -1.5(13) | -2.2(12)  | 4.6(12)  |
| C46  | 42.2(17) | 50.0(17) | 61.1(19) | 0.7(15)  | -8.0(14)  | -0.2(13) |

## Supplementary Information

|     |          |          |          |          |          |          |
|-----|----------|----------|----------|----------|----------|----------|
| C47 | 39.5(17) | 64(2)    | 59.6(19) | -0.8(16) | -9.8(14) | -4.8(14) |
| C48 | 30.4(15) | 66(2)    | 46.8(16) | 3.2(14)  | -1.3(12) | 3.1(13)  |
| C49 | 33.8(15) | 56.7(18) | 47.4(16) | 4.8(14)  | 7.2(12)  | 6.9(12)  |
| C50 | 35.1(15) | 49.5(16) | 46.8(15) | -1.0(13) | 0.9(12)  | 5.1(12)  |
| C51 | 34.6(16) | 80(2)    | 47.0(17) | 8.4(16)  | 4.8(12)  | 5.5(15)  |
| C52 | 37.7(16) | 78(2)    | 48.2(17) | 13.8(16) | 10.6(13) | 9.0(15)  |
| C53 | 43.2(17) | 61.3(19) | 49.5(17) | 9.5(15)  | 8.6(13)  | 11.5(14) |
| C54 | 39.3(18) | 95(3)    | 54.9(19) | 5.1(19)  | -1.6(14) | 1.2(17)  |
| C55 | 45(2)    | 125(4)   | 51(2)    | 15(2)    | -1.1(15) | 0(2)     |
| C56 | 54(2)    | 119(4)   | 57(2)    | 35(2)    | 4.5(17)  | 8(2)     |
| C57 | 50(2)    | 90(3)    | 58(2)    | 25(2)    | 9.9(16)  | 7.2(18)  |
| C58 | 58(2)    | 60(2)    | 62(2)    | 3.3(17)  | 11.6(16) | -0.5(16) |
| C59 | 72(2)    | 79(3)    | 58(2)    | 13.3(18) | 18.0(18) | 35(2)    |

**Supplementary Table 30.** Bond Lengths for **Flu-TDPP**.

| Atom Atom Length/Å |     |          | Atom Atom Length/Å |      |          |
|--------------------|-----|----------|--------------------|------|----------|
| S1                 | C14 | 1.738(3) | C25                | C30  | 1.390(4) |
| S1                 | C17 | 1.732(3) | C26                | C31  | 1.527(5) |
| S2                 | C41 | 1.731(3) | C26                | C32  | 1.531(5) |
| S2                 | C44 | 1.723(3) | C27                | C28  | 1.391(4) |
| O1                 | C6  | 1.229(4) | C28                | C29  | 1.391(5) |
| O2                 | C3  | 1.227(3) | C29                | C30  | 1.382(4) |
| N1                 | C1  | 1.397(4) | C33                | C34  | 1.515(5) |
| N1                 | C6  | 1.420(4) | C34                | C35  | 1.543(8) |
| N1                 | C7  | 1.463(4) | C34                | C35A | 1.573(7) |
| N2                 | C3  | 1.424(3) | C34                | C39  | 1.594(9) |
| N2                 | C4  | 1.395(4) | C34                | C39A | 1.514(7) |

## Supplementary Information

---

|      |     |          |      |      |          |
|------|-----|----------|------|------|----------|
| N2   | C33 | 1.457(4) | C35  | C36  | 1.522(9) |
| C1   | C2  | 1.384(4) | C35A | C36A | 1.523(8) |
| C1   | C14 | 1.444(4) | C36  | C37  | 1.543(9) |
| C01B | C8  | 1.536(4) | C36A | C37A | 1.501(8) |
| C01B | C13 | 1.544(5) | C37  | C38  | 1.537(9) |
| C2   | C3  | 1.445(4) | C37A | C38A | 1.593(8) |
| C2   | C5  | 1.408(4) | C39  | C40  | 1.445(9) |
| C4   | C5  | 1.386(4) | C39A | C40A | 1.511(7) |
| C4   | C41 | 1.443(4) | C41  | C42  | 1.383(4) |
| C5   | C6  | 1.444(4) | C42  | C43  | 1.401(4) |
| C7   | C8  | 1.526(4) | C43  | C44  | 1.372(4) |
| C8   | C9  | 1.527(4) | C44  | C45  | 1.469(4) |
| C9   | C10 | 1.503(5) | C45  | C46  | 1.393(4) |
| C10  | C11 | 1.540(5) | C45  | C50  | 1.402(4) |
| C11  | C12 | 1.512(5) | C46  | C47  | 1.385(4) |
| C14  | C15 | 1.373(4) | C47  | C48  | 1.382(5) |
| C15  | C16 | 1.400(4) | C48  | C49  | 1.397(4) |
| C16  | C17 | 1.369(4) | C48  | C51  | 1.468(4) |
| C17  | C18 | 1.463(4) | C49  | C50  | 1.382(4) |
| C18  | C19 | 1.403(4) | C49  | C53  | 1.514(4) |
| C18  | C23 | 1.405(4) | C51  | C52  | 1.398(5) |
| C19  | C20 | 1.389(4) | C51  | C54  | 1.393(5) |
| C20  | C21 | 1.386(4) | C52  | C53  | 1.527(5) |
| C21  | C22 | 1.399(4) | C52  | C57  | 1.389(5) |
| C21  | C24 | 1.467(4) | C53  | C58  | 1.522(5) |
| C22  | C23 | 1.388(4) | C53  | C59  | 1.540(5) |
| C22  | C26 | 1.514(4) | C54  | C55  | 1.390(6) |

## Supplementary Information

---

C24 C25 1.397(4)                      C55 C56 1.380(7)

C24 C27 1.394(4)                      C56 C57 1.379(6)

C25 C26 1.524(4)

---

**Supplementary Table 31.** Bond Angles for **Flu-TDPP**.

| Atom | Atom | Atom | Angle/°   | Atom | Atom | Atom | Angle/°  |
|------|------|------|-----------|------|------|------|----------|
| C17  | S1   | C14  | 92.54(14) | C22  | C26  | C31  | 111.8(3) |
| C44  | S2   | C41  | 92.37(14) | C22  | C26  | C32  | 110.9(3) |
| C1   | N1   | C6   | 111.4(2)  | C25  | C26  | C31  | 111.4(3) |
| C1   | N1   | C7   | 128.4(2)  | C25  | C26  | C32  | 110.8(3) |
| C6   | N1   | C7   | 120.2(2)  | C31  | C26  | C32  | 110.6(3) |
| C3   | N2   | C33  | 119.8(2)  | C28  | C27  | C24  | 118.8(3) |
| C4   | N2   | C3   | 111.2(2)  | C27  | C28  | C29  | 120.6(3) |
| C4   | N2   | C33  | 128.9(2)  | C30  | C29  | C28  | 120.8(3) |
| N1   | C1   | C14  | 126.4(3)  | C29  | C30  | C25  | 119.1(3) |
| C2   | C1   | N1   | 106.6(2)  | N2   | C33  | C34  | 116.7(3) |
| C2   | C1   | C14  | 126.9(3)  | C33  | C34  | C35  | 119.5(7) |
| C8   | C01B | C13  | 114.9(3)  | C33  | C34  | C35A | 101.9(4) |
| C1   | C2   | C3   | 142.2(3)  | C33  | C34  | C39  | 98.8(6)  |
| C1   | C2   | C5   | 109.7(3)  | C35  | C34  | C39  | 99.7(6)  |
| C5   | C2   | C3   | 108.0(2)  | C39A | C34  | C33  | 115.3(4) |
| O2   | C3   | N2   | 122.5(3)  | C39A | C34  | C35A | 117.9(6) |
| O2   | C3   | C2   | 133.3(3)  | C36  | C35  | C34  | 107.8(8) |
| N2   | C3   | C2   | 104.2(2)  | C36A | C35A | C34  | 115.9(6) |
| N2   | C4   | C41  | 126.5(3)  | C35  | C36  | C37  | 107.4(8) |
| C5   | C4   | N2   | 106.7(2)  | C37A | C36A | C35A | 120.2(7) |
| C5   | C4   | C41  | 126.7(3)  | C38  | C37  | C36  | 111.5(9) |

## Supplementary Information

---

|     |     |      |          |                |          |
|-----|-----|------|----------|----------------|----------|
| C2  | C5  | C6   | 108.2(3) | C36A C37A C38A | 111.6(7) |
| C4  | C5  | C2   | 109.8(3) | C40 C39 C34    | 102.3(8) |
| C4  | C5  | C6   | 142.0(3) | C40A C39A C34  | 127.6(6) |
| O1  | C6  | N1   | 122.8(3) | C4 C41 S2      | 125.6(2) |
| O1  | C6  | C5   | 133.2(3) | C42 C41 S2     | 110.4(2) |
| N1  | C6  | C5   | 104.1(2) | C42 C41 C4     | 124.0(3) |
| N1  | C7  | C8   | 113.1(3) | C41 C42 C43    | 112.9(3) |
| C7  | C8  | C01B | 112.5(3) | C44 C43 C42    | 113.8(3) |
| C7  | C8  | C9   | 109.8(3) | C43 C44 S2     | 110.6(2) |
| C9  | C8  | C01B | 112.9(3) | C43 C44 C45    | 129.5(3) |
| C10 | C9  | C8   | 115.4(3) | C45 C44 S2     | 119.8(2) |
| C9  | C10 | C11  | 114.3(3) | C46 C45 C44    | 120.1(3) |
| C12 | C11 | C10  | 113.7(3) | C46 C45 C50    | 118.9(3) |
| C1  | C14 | S1   | 126.4(2) | C50 C45 C44    | 120.9(3) |
| C15 | C14 | S1   | 109.7(2) | C47 C46 C45    | 121.1(3) |
| C15 | C14 | C1   | 123.8(3) | C48 C47 C46    | 119.5(3) |
| C14 | C15 | C16  | 113.8(3) | C47 C48 C49    | 120.3(3) |
| C17 | C16 | C15  | 113.8(3) | C47 C48 C51    | 131.7(3) |
| C16 | C17 | S1   | 110.1(2) | C49 C48 C51    | 107.9(3) |
| C16 | C17 | C18  | 128.6(3) | C48 C49 C53    | 111.8(3) |
| C18 | C17 | S1   | 121.3(2) | C50 C49 C48    | 119.9(3) |
| C19 | C18 | C17  | 119.8(3) | C50 C49 C53    | 128.3(3) |
| C19 | C18 | C23  | 118.4(3) | C49 C50 C45    | 120.2(3) |
| C23 | C18 | C17  | 121.8(3) | C52 C51 C48    | 108.5(3) |
| C20 | C19 | C18  | 121.4(3) | C54 C51 C48    | 130.8(4) |
| C21 | C20 | C19  | 119.4(3) | C54 C51 C52    | 120.7(3) |
| C20 | C21 | C22  | 120.1(3) | C51 C52 C53    | 111.0(3) |

## Supplementary Information

---

|     |     |     |          |     |     |     |          |
|-----|-----|-----|----------|-----|-----|-----|----------|
| C20 | C21 | C24 | 131.7(3) | C57 | C52 | C51 | 119.9(4) |
| C22 | C21 | C24 | 108.1(3) | C57 | C52 | C53 | 129.1(4) |
| C21 | C22 | C26 | 111.4(2) | C49 | C53 | C52 | 100.6(3) |
| C23 | C22 | C21 | 120.4(3) | C49 | C53 | C58 | 113.0(3) |
| C23 | C22 | C26 | 128.1(3) | C49 | C53 | C59 | 109.5(3) |
| C22 | C23 | C18 | 120.2(3) | C52 | C53 | C59 | 110.6(3) |
| C25 | C24 | C21 | 108.4(2) | C58 | C53 | C52 | 112.9(3) |
| C27 | C24 | C21 | 131.2(3) | C58 | C53 | C59 | 110.0(3) |
| C27 | C24 | C25 | 120.3(3) | C55 | C54 | C51 | 118.4(4) |
| C24 | C25 | C26 | 111.0(2) | C56 | C55 | C54 | 120.8(4) |
| C30 | C25 | C24 | 120.4(3) | C57 | C56 | C55 | 121.0(4) |
| C30 | C25 | C26 | 128.5(3) | C56 | C57 | C52 | 119.2(4) |
| C22 | C26 | C25 | 101.0(2) |     |     |     |          |

---

**Supplementary Table 32.** Torsion Angles for **Flu-TDPP**.

| A  | B   | C   | D    | Angle/°   | A   | B   | C   | D   | Angle/°   |
|----|-----|-----|------|-----------|-----|-----|-----|-----|-----------|
| S1 | C14 | C15 | C16  | -0.1(3)   | C22 | C21 | C24 | C27 | 179.6(3)  |
| S1 | C17 | C18 | C19  | 179.2(2)  | C23 | C18 | C19 | C20 | 0.5(5)    |
| S1 | C17 | C18 | C23  | 0.7(4)    | C23 | C22 | C26 | C25 | 176.3(3)  |
| S2 | C41 | C42 | C43  | 0.0(3)    | C23 | C22 | C26 | C31 | -65.2(4)  |
| S2 | C44 | C45 | C46  | -161.0(3) | C23 | C22 | C26 | C32 | 58.7(4)   |
| S2 | C44 | C45 | C50  | 15.0(4)   | C24 | C21 | C22 | C23 | -177.4(3) |
| N1 | C1  | C2  | C3   | 179.6(4)  | C24 | C21 | C22 | C26 | 0.1(3)    |
| N1 | C1  | C2  | C5   | 1.5(3)    | C24 | C25 | C26 | C22 | 1.6(3)    |
| N1 | C1  | C14 | S1   | 13.0(5)   | C24 | C25 | C26 | C31 | -117.3(3) |
| N1 | C1  | C14 | C15  | -168.4(3) | C24 | C25 | C26 | C32 | 119.2(3)  |
| N1 | C7  | C8  | C01B | 67.7(3)   | C24 | C25 | C30 | C29 | 0.5(5)    |

## Supplementary Information

---

|      |     |     |      |           |      |      |      |      |            |
|------|-----|-----|------|-----------|------|------|------|------|------------|
| N1   | C7  | C8  | C9   | -165.6(3) | C24  | C27  | C28  | C29  | 0.1(5)     |
| N2   | C4  | C5  | C2   | 1.1(3)    | C25  | C24  | C27  | C28  | 2.0(5)     |
| N2   | C4  | C5  | C6   | -179.6(4) | C26  | C22  | C23  | C18  | -176.5(3)  |
| N2   | C4  | C41 | S2   | -1.5(4)   | C26  | C25  | C30  | C29  | 178.3(3)   |
| N2   | C4  | C41 | C42  | -179.2(3) | C27  | C24  | C25  | C26  | 179.5(3)   |
| N2   | C33 | C34 | C35  | -177.6(6) | C27  | C24  | C25  | C30  | -2.3(4)    |
| N2   | C33 | C34 | C35A | 168.3(5)  | C27  | C28  | C29  | C30  | -1.9(5)    |
| N2   | C33 | C34 | C39  | -71.1(5)  | C28  | C29  | C30  | C25  | 1.6(5)     |
| N2   | C33 | C34 | C39A | -62.6(5)  | C30  | C25  | C26  | C22  | -176.5(3)  |
| C1   | N1  | C6  | O1   | -179.2(3) | C30  | C25  | C26  | C31  | 64.7(4)    |
| C1   | N1  | C6  | C5   | 0.6(3)    | C30  | C25  | C26  | C32  | -58.8(4)   |
| C1   | N1  | C7  | C8   | 80.3(4)   | C33  | N2   | C3   | O2   | -3.3(4)    |
| C1   | C2  | C3  | O2   | 1.6(7)    | C33  | N2   | C3   | C2   | 176.9(2)   |
| C1   | C2  | C3  | N2   | -178.6(4) | C33  | N2   | C4   | C5   | -176.6(3)  |
| C1   | C2  | C5  | C4   | 178.4(2)  | C33  | N2   | C4   | C41  | 1.3(5)     |
| C1   | C2  | C5  | C6   | -1.2(4)   | C33  | C34  | C35  | C36  | -63.2(14)  |
| C1   | C14 | C15 | C16  | -178.9(3) | C33  | C34  | C35A | C36A | -143.7(8)  |
| C01B | C8  | C9  | C10  | -58.8(4)  | C33  | C34  | C39  | C40  | 109.9(8)   |
| C2   | C1  | C14 | S1   | -168.8(2) | C33  | C34  | C39A | C40A | 151.0(9)   |
| C2   | C1  | C14 | C15  | 9.7(5)    | C34  | C35  | C36  | C37  | 173.8(10)  |
| C2   | C5  | C6  | O1   | -179.9(4) | C34  | C35A | C36A | C37A | -174.6(9)  |
| C2   | C5  | C6  | N1   | 0.3(3)    | C35  | C34  | C39  | C40  | -128.0(11) |
| C3   | N2  | C4  | C5   | -1.5(3)   | C35  | C36  | C37  | C38  | 100.7(17)  |
| C3   | N2  | C4  | C41  | 176.5(3)  | C35A | C34  | C39A | C40A | -88.4(11)  |
| C3   | N2  | C33 | C34  | 102.2(3)  | C35A | C36A | C37A | C38A | 173.5(10)  |
| C3   | C2  | C5  | C4   | -0.4(3)   | C39  | C34  | C35  | C36  | -169.1(12) |
| C3   | C2  | C5  | C6   | -179.9(2) | C39A | C34  | C35A | C36A | 88.9(10)   |

## Supplementary Information

---

|                 |           |                 |           |
|-----------------|-----------|-----------------|-----------|
| C4 N2 C3 O2     | -178.9(3) | C41 S2 C44 C43  | -0.6(2)   |
| C4 N2 C3 C2     | 1.2(3)    | C41 S2 C44 C45  | 175.7(2)  |
| C4 N2 C33 C34   | -83.1(4)  | C41 C4 C5 C2    | -176.8(3) |
| C4 C5 C6 O1     | 0.8(7)    | C41 C4 C5 C6    | 2.5(6)    |
| C4 C5 C6 N1     | -179.0(4) | C41 C42 C43 C44 | -0.5(4)   |
| C4 C41 C42 C43  | 178.0(3)  | C42 C43 C44 S2  | 0.8(3)    |
| C5 C2 C3 O2     | 179.7(3)  | C42 C43 C44 C45 | -175.1(3) |
| C5 C2 C3 N2     | -0.5(3)   | C43 C44 C45 C46 | 14.6(5)   |
| C5 C4 C41 S2    | 176.1(2)  | C43 C44 C45 C50 | -169.4(3) |
| C5 C4 C41 C42   | -1.6(5)   | C44 S2 C41 C4   | -177.6(3) |
| C6 N1 C1 C2     | -1.3(3)   | C44 S2 C41 C42  | 0.4(2)    |
| C6 N1 C1 C14    | 177.1(3)  | C44 C45 C46 C47 | 173.4(3)  |
| C6 N1 C7 C8     | -98.3(3)  | C44 C45 C50 C49 | -174.4(3) |
| C7 N1 C1 C2     | 180.0(3)  | C45 C46 C47 C48 | 0.8(5)    |
| C7 N1 C1 C14    | -1.6(5)   | C46 C45 C50 C49 | 1.6(5)    |
| C7 N1 C6 O1     | -0.4(5)   | C46 C47 C48 C49 | 2.2(5)    |
| C7 N1 C6 C5     | 179.4(3)  | C46 C47 C48 C51 | -174.9(3) |
| C7 C8 C9 C10    | 174.7(3)  | C47 C48 C49 C50 | -3.2(5)   |
| C8 C9 C10 C11   | -176.2(3) | C47 C48 C49 C53 | 177.9(3)  |
| C9 C10 C11 C12  | 61.9(5)   | C47 C48 C51 C52 | 179.3(4)  |
| C13 C01BC8 C7   | 69.3(4)   | C47 C48 C51 C54 | 1.5(6)    |
| C13 C01BC8 C9   | -55.7(4)  | C48 C49 C50 C45 | 1.3(4)    |
| C14 S1 C17 C16  | -0.1(2)   | C48 C49 C53 C52 | 4.9(3)    |
| C14 S1 C17 C18  | -178.5(2) | C48 C49 C53 C58 | 125.5(3)  |
| C14 C1 C2 C3    | 1.1(6)    | C48 C49 C53 C59 | -111.6(3) |
| C14 C1 C2 C5    | -176.9(3) | C48 C51 C52 C53 | 1.3(4)    |
| C14 C15 C16 C17 | 0.1(4)    | C48 C51 C52 C57 | -178.1(3) |



## Supplementary Information

---

|                 |           |                 |           |
|-----------------|-----------|-----------------|-----------|
| C15 C16 C17 S1  | 0.0(3)    | C48 C51 C54 C55 | 176.5(3)  |
| C15 C16 C17 C18 | 178.3(3)  | C49 C48 C51 C52 | 1.9(4)    |
| C16 C17 C18 C19 | 1.2(5)    | C49 C48 C51 C54 | -175.8(3) |
| C16 C17 C18 C23 | -177.4(3) | C50 C45 C46 C47 | -2.7(5)   |
| C17 S1 C14 C1   | 178.9(3)  | C50 C49 C53 C52 | -173.9(3) |
| C17 S1 C14 C15  | 0.1(2)    | C50 C49 C53 C58 | -53.3(4)  |
| C17 C18 C19 C20 | -178.1(3) | C50 C49 C53 C59 | 69.6(4)   |
| C17 C18 C23 C22 | 177.6(3)  | C51 C48 C49 C50 | 174.5(3)  |
| C18 C19 C20 C21 | 0.3(5)    | C51 C48 C49 C53 | -4.5(3)   |
| C19 C18 C23 C22 | -0.9(4)   | C51 C52 C53 C49 | -3.6(3)   |
| C19 C20 C21 C22 | -0.7(4)   | C51 C52 C53 C58 | -124.3(3) |
| C19 C20 C21 C24 | 176.3(3)  | C51 C52 C53 C59 | 112.0(3)  |
| C20 C21 C22 C23 | 0.2(4)    | C51 C52 C57 C56 | 0.9(5)    |
| C20 C21 C22 C26 | 177.7(3)  | C51 C54 C55 C56 | 1.4(6)    |
| C20 C21 C24 C25 | -176.3(3) | C52 C51 C54 C55 | -1.0(5)   |
| C20 C21 C24 C27 | 2.4(5)    | C53 C49 C50 C45 | -180.0(3) |
| C21 C22 C23 C18 | 0.6(4)    | C53 C52 C57 C56 | -178.4(3) |
| C21 C22 C26 C25 | -1.0(3)   | C54 C51 C52 C53 | 179.3(3)  |
| C21 C22 C26 C31 | 117.6(3)  | C54 C51 C52 C57 | -0.1(5)   |
| C21 C22 C26 C32 | -118.5(3) | C54 C55 C56 C57 | -0.7(6)   |
| C21 C24 C25 C26 | -1.6(3)   | C55 C56 C57 C52 | -0.5(6)   |
| C21 C24 C25 C30 | 176.6(3)  | C57 C52 C53 C49 | 175.7(3)  |
| C21 C24 C27 C28 | -176.6(3) | C57 C52 C53 C58 | 55.0(5)   |
| C22 C21 C24 C25 | 1.0(3)    | C57 C52 C53 C59 | -68.7(4)  |

---

**Supplementary Table 33.** Hydrogen Atom Coordinates ( $\text{\AA} \times 10^4$ ) and Isotropic Displacement Parameters ( $\text{\AA}^2 \times 10^3$ ) for **Flu-TDPP**.

| Atom | $x$ | $y$ | $z$ | $U(\text{eq})$ |
|------|-----|-----|-----|----------------|
|------|-----|-----|-----|----------------|

---

## Supplementary Information

---

|              |          |         |     |
|--------------|----------|---------|-----|
| H01A 6907.16 | 7363.82  | 5338.57 | 66  |
| H01B 6015.03 | 8161.71  | 5333.22 | 66  |
| H7A 6430.52  | 6952.56  | 4048.18 | 55  |
| H7B 7512.01  | 7366.73  | 4383.13 | 55  |
| H8 5362.86   | 7223.43  | 4698.48 | 59  |
| H9A 6196.63  | 8783.49  | 4278.19 | 61  |
| H9B 5207.86  | 8158.19  | 4012.62 | 61  |
| H10A 5058.4  | 9240.47  | 4837.62 | 69  |
| H10B 4078    | 8574.43  | 4603.69 | 69  |
| H11A 3665.45 | 10079.65 | 4351.61 | 78  |
| H11B 4799.29 | 10117.2  | 4115.87 | 78  |
| H12A 4058.49 | 9048.84  | 3534.82 | 110 |
| H12B 3217.53 | 9887.09  | 3515.4  | 110 |
| H12C 2933.53 | 8977.6   | 3776.33 | 110 |
| H13A 8121.86 | 8357.81  | 4972.95 | 98  |
| H13B 7914.7  | 8706.73  | 5494.04 | 98  |
| H13C 7246.03 | 9155.27  | 5012.82 | 98  |
| H15 4774.53  | 4083.6   | 4534.25 | 53  |
| H16 2968.57  | 4174.85  | 3996.86 | 54  |
| H19 1478.9   | 4555.45  | 3452.76 | 54  |
| H20 -39.31   | 4921.98  | 2856.13 | 54  |
| H23 3101.31  | 6840.79  | 3163.45 | 52  |
| H27 -1526.52 | 5633.21  | 2118.42 | 58  |
| H28 -2439.7  | 6428.26  | 1444.94 | 65  |
| H29 -1600.27 | 7697.71  | 1166.7  | 63  |
| H30 110.75   | 8240.75  | 1578.64 | 57  |
| H31A 786.75  | 8334.16  | 2850.84 | 101 |

### Supplementary Information

---

|               |         |         |     |
|---------------|---------|---------|-----|
| H31B 1321.99  | 8833.02 | 2432.32 | 101 |
| H31C 2129.91  | 8422.77 | 2890.04 | 101 |
| H32A 3136.03  | 7560.33 | 2301.99 | 95  |
| H32B 2278.07  | 7933.06 | 1849.18 | 95  |
| H32C 2436.52  | 6874.75 | 1928.96 | 95  |
| H33A 7446.13  | 2500.22 | 5557.33 | 56  |
| H33B 8498.28  | 2925.45 | 5902.81 | 56  |
| H34A 9675.27  | 2472.58 | 5288.35 | 81  |
| H34 9695.1    | 2497.96 | 5348.73 | 81  |
| H35A 8479.76  | 902.42  | 5576.1  | 122 |
| H35B 9690.05  | 882.4   | 5395.53 | 122 |
| H35C 9039.71  | 1706.63 | 6069.29 | 119 |
| H35D 8656.18  | 940.47  | 5679.23 | 119 |
| H36A 9328.14  | 1766.11 | 6276.75 | 118 |
| H36B 10537.76 | 1631.13 | 6105.07 | 118 |
| H36C 10565.44 | 844.9   | 5533.06 | 107 |
| H36D 10913.78 | 1546.57 | 5959.04 | 107 |
| H37A 9706.69  | 477.48  | 6676.47 | 152 |
| H37B 9335.96  | 13.87   | 6158.95 | 152 |
| H37C 10115.79 | -201.09 | 6119.36 | 143 |
| H37D 10607.72 | 500.42  | 6533.03 | 143 |
| H38A 11063.08 | -472.98 | 6146.17 | 219 |
| H38B 11374.12 | -145.93 | 6696.5  | 219 |
| H38C 11584.9  | 505.31  | 6263.69 | 219 |
| H38D 12309.52 | -142.04 | 6525.55 | 212 |
| H38E 12325.01 | 331.27  | 6012.22 | 212 |
| H38F 11866.02 | -673.73 | 6035.07 | 212 |

---

Supplementary Information

---

|               |         |         |     |
|---------------|---------|---------|-----|
| H39A 8132.86  | 1240.44 | 4820.57 | 125 |
| H39B 7382.14  | 2127.38 | 4864.34 | 125 |
| H39C 8065.78  | 1336.17 | 4871.71 | 101 |
| H39D 8063.53  | 2339.5  | 4687.34 | 101 |
| H40A 8503.84  | 2012.76 | 4190.98 | 83  |
| H40B 9517.48  | 2329.47 | 4598.02 | 83  |
| H40C 8429.87  | 2955.43 | 4458.57 | 83  |
| H40D 9718.85  | 2100.51 | 4381.59 | 183 |
| H40E 8786.73  | 1374.04 | 4170.96 | 183 |
| H40F 9792.64  | 1099.9  | 4591.83 | 183 |
| H42 10045.78  | 5889.37 | 5549.23 | 53  |
| H43 11774.98  | 5802.71 | 6140.99 | 53  |
| H46 12914.16  | 5460.34 | 6872.42 | 63  |
| H47 14179.92  | 5043.38 | 7556.03 | 68  |
| H50 12029.42  | 2855.37 | 6625.11 | 53  |
| H54 15346.11  | 4234.3  | 8347.78 | 77  |
| H55 16135.3   | 3248.51 | 8963.03 | 89  |
| H56 15817.22  | 1717.91 | 8888.06 | 93  |
| H57 14679.37  | 1129.33 | 8209.51 | 79  |
| H58A 12067.68 | 1929.43 | 7720.41 | 90  |
| H58B 12701.15 | 1008.6  | 7640.66 | 90  |
| H58C 11965.74 | 1502.56 | 7189.58 | 90  |
| H59A 13643.55 | 1529.04 | 6743.58 | 103 |
| H59B 14353.6  | 1004.29 | 7190.03 | 103 |
| H59C 14818.74 | 1930.2  | 7007.95 | 103 |

---

**Supplementary Table 34.** Atomic Occupancy for **Flu-TDPP**.

---

## Supplementary Information

| <i>Atom Occupancy</i> | <i>Atom Occupancy</i> | <i>Atom Occupancy</i> |
|-----------------------|-----------------------|-----------------------|
| H34A 0.383(5)         | H34 0.617(5)          | C35 0.383(5)          |
| H35A 0.383(5)         | H35B 0.383(5)         | C35A 0.617(5)         |
| H35C 0.617(5)         | H35D 0.617(5)         | C36 0.383(5)          |
| H36A 0.383(5)         | H36B 0.383(5)         | C36A 0.617(5)         |
| H36C 0.617(5)         | H36D 0.617(5)         | C37 0.383(5)          |
| H37A 0.383(5)         | H37B 0.383(5)         | C37A 0.617(5)         |
| H37C 0.617(5)         | H37D 0.617(5)         | C38 0.383(5)          |
| H38A 0.383(5)         | H38B 0.383(5)         | H38C 0.383(5)         |
| C38A 0.617(5)         | H38D 0.617(5)         | H38E 0.617(5)         |
| H38F 0.617(5)         | C39 0.383(5)          | H39A 0.383(5)         |
| H39B 0.383(5)         | C39A 0.617(5)         | H39C 0.617(5)         |
| H39D 0.617(5)         | C40 0.383(5)          | H40A 0.383(5)         |
| H40B 0.383(5)         | H40C 0.383(5)         | C40A 0.617(5)         |
| H40D 0.617(5)         | H40E 0.617(5)         | H40F 0.617(5)         |

### 2.9. X-ray crystallographic data for TPAOMe-TDPP-C4

**Supplementary Table 35.** Crystal data and structure refinement for TPAOMe-TDPP-C4.

|                     |                                                                              |
|---------------------|------------------------------------------------------------------------------|
| Identification code | TPAOMe-TDPP-C4                                                               |
| Empirical formula   | C <sub>62</sub> H <sub>58</sub> N <sub>4</sub> O <sub>6</sub> S <sub>2</sub> |
| Formula weight      | 1019.24                                                                      |
| Temperature/K       | 150.00(10)                                                                   |
| Crystal system      | monoclinic                                                                   |
| Space group         | P2 <sub>1</sub> /n                                                           |
| a/Å                 | 14.3751(2)                                                                   |
| b/Å                 | 10.10090(10)                                                                 |
| c/Å                 | 18.6369(3)                                                                   |

## Supplementary Information

|                                                |                                                               |
|------------------------------------------------|---------------------------------------------------------------|
| $\alpha/^\circ$                                | 90                                                            |
| $\beta/^\circ$                                 | 97.4310(10)                                                   |
| $\gamma/^\circ$                                | 90                                                            |
| Volume/ $\text{\AA}^3$                         | 2683.38(6)                                                    |
| Z                                              | 2                                                             |
| $\rho_{\text{calc}}/\text{cm}^3$               | 1.261                                                         |
| $\mu/\text{mm}^{-1}$                           | 1.347                                                         |
| F(000)                                         | 1076.0                                                        |
| Crystal size/ $\text{mm}^3$                    | $0.1 \times 0.06 \times 0.01$                                 |
| Radiation                                      | CuK $\alpha$ ( $\lambda = 1.54184$ )                          |
| 2 $\Theta$ range for data collection/ $^\circ$ | 7.326 to 134.148                                              |
| Index ranges                                   | $-16 \leq h \leq 17, -12 \leq k \leq 12, -20 \leq l \leq 22$  |
| Reflections collected                          | 13509                                                         |
| Independent reflections                        | 4779 [ $R_{\text{int}} = 0.0221, R_{\text{sigma}} = 0.0305$ ] |
| Data/restraints/parameters                     | 4779/0/337                                                    |
| Goodness-of-fit on $F^2$                       | 1.071                                                         |
| Final R indexes [ $I \geq 2\sigma(I)$ ]        | $R_1 = 0.0353, wR_2 = 0.0929$                                 |
| Final R indexes [all data]                     | $R_1 = 0.0414, wR_2 = 0.0961$                                 |
| Largest diff. peak/hole / $e \text{\AA}^{-3}$  | 0.29/-0.25                                                    |

**Supplementary Table 36.** Fractional Atomic Coordinates ( $\times 10^4$ ) and Equivalent Isotropic Displacement Parameters ( $\text{\AA}^2 \times 10^3$ ) for TPAOMe-TDPP-C4.  $U_{\text{eq}}$  is defined as 1/3 of the trace of the orthogonalised  $U_{\text{ij}}$  tensor.

| Atom | $x$        | $y$         | $z$       | $U(\text{eq})$ |
|------|------------|-------------|-----------|----------------|
| S01  | 5151.2(2)  | 4234.1(4)   | 4114.7(2) | 30.72(11)      |
| O002 | 2982.7(7)  | -246.3(11)  | 4461.3(6) | 36.3(3)        |
| O003 | 4280.9(8)  | 12729.7(12) | 1277.6(7) | 48.9(3)        |
| O004 | 10403.4(8) | 12589.6(13) | 4005.6(7) | 51.2(3)        |
| N005 | 4077.9(8)  | 1434.3(12)  | 4452.7(7) | 30.3(3)        |

## Supplementary Information

---

|                 |             |            |         |
|-----------------|-------------|------------|---------|
| N006 6953.0(9)  | 10130.9(13) | 3222.0(7)  | 38.4(3) |
| C007 5364.0(10) | 468.5(15)   | 5016.3(8)  | 29.5(3) |
| C008 6378.3(10) | 6352.4(15)  | 4033.4(8)  | 30.4(3) |
| C009 5022.0(10) | 1644.0(15)  | 4690.4(8)  | 28.9(3) |
| C00A 3795.3(10) | 133.9(15)   | 4621.6(8)  | 29.8(3) |
| C00B 6130.9(10) | 12164.3(16) | 2811.2(8)  | 34.6(3) |
| C00C 5656.7(10) | 7243.4(15)  | 3814.4(8)  | 31.8(3) |
| C00D 5539.2(10) | 2846.7(14)  | 4618.4(8)  | 30.1(3) |
| C00E 6756.0(11) | 8886.3(15)  | 3496.2(8)  | 32.9(3) |
| C00F 7841.5(11) | 10740.2(15) | 3440.0(9)  | 33.6(3) |
| C00G 6215.0(10) | 5031.4(15)  | 4316.0(8)  | 31.3(3) |
| C00H 6455.6(11) | 3030.2(16)  | 4926.3(9)  | 35.9(4) |
| C00I 7297.0(11) | 6762.8(15)  | 3974.8(8)  | 32.4(3) |
| C00J 6285.6(11) | 10822.9(15) | 2728.8(8)  | 35.3(4) |
| C00K 8412.4(11) | 11103.9(15) | 2925.9(9)  | 35.2(3) |
| C00L 5835.7(11) | 8488.7(15)  | 3555.7(8)  | 33.6(3) |
| C00M 4961.1(11) | 12170.8(17) | 1769.1(9)  | 38.6(4) |
| C00N 9260.4(11) | 11712.2(16) | 3134.9(9)  | 37.0(4) |
| C00O 7483.6(11) | 7997.9(15)  | 3714.4(8)  | 34.1(3) |
| C00P 5481.2(10) | 12840.3(16) | 2331.2(8)  | 35.3(3) |
| C00Q 3367.9(10) | 2343.5(16)  | 4107.6(9)  | 35.6(4) |
| C00R 9551.7(11) | 11974.1(16) | 3859.2(9)  | 37.2(4) |
| C00S 6830.4(11) | 4252.6(15)  | 4756.4(9)  | 36.4(4) |
| C00T 8140.5(12) | 10989.6(17) | 4160.5(9)  | 40.5(4) |
| C00U 8990.6(12) | 11605.2(17) | 4376.9(9)  | 41.6(4) |
| C00V 5121.6(14) | 10829.9(18) | 1677.4(10) | 48.6(5) |
| C00W 5782.4(14) | 10172.2(17) | 2146.0(10) | 47.5(4) |

## Supplementary Information

|      |             |             |            |           |
|------|-------------|-------------|------------|-----------|
| C00X | 3162.3(12)  | 2159(2)     | 3294.8(9)  | 47.5(4)   |
| C00Y | 4104.9(13)  | 14098.1(19) | 1362.4(12) | 56.8(5)   |
| C00Z | 2382.9(14)  | 3054(3)     | 2956.2(12) | 69.8(7)   |
| C010 | 10752.9(16) | 12797(3)    | 4736.9(12) | 76.5(7)   |
| C011 | 2015.5(18)  | 2677(4)     | 2178.1(14) | 103.7(11) |

**Supplementary Table 37.** Anisotropic Displacement Parameters ( $\text{\AA}^2 \times 10^3$ ) for TPAOMe-TDPP-C4. The Anisotropic displacement factor exponent takes the form:  $-2\pi^2[h^2a^{*2}U_{11}+2hka^*b^*U_{12}+\dots]$ .

| Atom | $U_{11}$ | $U_{22}$ | $U_{33}$ | $U_{23}$ | $U_{13}$ | $U_{12}$  |
|------|----------|----------|----------|----------|----------|-----------|
| S01  | 35.5(2)  | 26.6(2)  | 30.3(2)  | 2.42(14) | 5.07(14) | -4.23(14) |
| O002 | 32.3(5)  | 36.5(6)  | 39.6(6)  | 5.9(5)   | 3.1(4)   | -6.8(5)   |
| O003 | 48.2(7)  | 44.5(7)  | 50.1(7)  | 6.4(6)   | -8.8(6)  | -2.8(6)   |
| O004 | 42.9(6)  | 57.0(8)  | 53.1(8)  | 2.2(6)   | 3.4(5)   | -13.8(6)  |
| N005 | 32.7(6)  | 27.6(7)  | 30.8(6)  | 3.6(5)   | 4.8(5)   | -2.5(5)   |
| N006 | 42.2(7)  | 29.7(7)  | 42.0(8)  | 9.2(6)   | 0.9(6)   | -6.6(6)   |
| C007 | 32.7(7)  | 26.9(7)  | 29.8(7)  | -0.2(6)  | 7.2(6)   | -5.2(6)   |
| C008 | 38.0(8)  | 27.7(8)  | 26.2(7)  | -0.5(6)  | 7.1(6)   | -4.5(6)   |
| C009 | 33.6(7)  | 28.4(8)  | 25.5(7)  | -0.9(6)  | 7.0(6)   | -3.6(6)   |
| C00A | 34.2(7)  | 29.9(8)  | 26.2(7)  | -0.1(6)  | 7.0(6)   | -5.3(6)   |
| C00B | 35.6(8)  | 34.4(8)  | 34.2(8)  | -1.5(7)  | 5.4(6)   | -4.3(7)   |
| C00C | 35.4(8)  | 31.0(8)  | 29.7(8)  | -1.4(6)  | 6.8(6)   | -4.9(6)   |
| C00D | 36.8(7)  | 27.3(8)  | 27.0(7)  | 1.3(6)   | 6.9(6)   | -3.3(6)   |
| C00E | 42.1(8)  | 27.9(8)  | 28.7(7)  | 2.1(6)   | 4.8(6)   | -5.3(6)   |
| C00F | 40.2(8)  | 24.7(7)  | 36.3(8)  | 4.9(6)   | 6.2(6)   | -1.9(6)   |
| C00G | 37.2(8)  | 28.5(8)  | 29.3(7)  | -1.7(6)  | 8.6(6)   | -3.0(6)   |
| C00H | 39.4(8)  | 29.8(8)  | 38.2(8)  | 6.4(7)   | 3.4(7)   | -3.5(7)   |
| C00I | 36.8(8)  | 29.2(8)  | 31.5(8)  | 2.3(6)   | 5.9(6)   | -1.4(6)   |
| C00J | 40.5(8)  | 31.8(8)  | 33.5(8)  | 6.5(6)   | 5.1(7)   | -5.0(7)   |



## Supplementary Information

|      |          |          |          |           |           |           |
|------|----------|----------|----------|-----------|-----------|-----------|
| C00K | 44.8(8)  | 29.4(8)  | 31.6(8)  | 3.9(6)    | 5.9(6)    | 2.2(7)    |
| C00L | 38.5(8)  | 29.5(8)  | 33.0(8)  | 2.2(6)    | 4.8(6)    | -0.4(6)   |
| C00M | 39.0(8)  | 39.3(9)  | 37.0(9)  | 7.4(7)    | 3.3(7)    | -5.4(7)   |
| C00N | 42.2(8)  | 34.4(8)  | 36.5(9)  | 7.7(7)    | 12.4(7)   | 1.4(7)    |
| C00O | 34.9(8)  | 33.2(8)  | 35.0(8)  | 2.4(6)    | 7.8(6)    | -5.1(6)   |
| C00P | 35.6(8)  | 32.2(8)  | 39.0(9)  | 1.5(7)    | 8.2(7)    | -0.7(6)   |
| C00Q | 31.4(7)  | 32.9(8)  | 42.9(9)  | 6.1(7)    | 6.2(6)    | -1.4(6)   |
| C00R | 37.5(8)  | 30.4(8)  | 44.0(9)  | 2.6(7)    | 6.6(7)    | -2.3(7)   |
| C00S | 36.1(8)  | 31.9(8)  | 40.6(9)  | 4.1(7)    | 3.3(7)    | -7.0(7)   |
| C00T | 47.8(9)  | 40.5(9)  | 35.4(9)  | 2.2(7)    | 13.7(7)   | -7.8(7)   |
| C00U | 50.4(9)  | 42.2(10) | 32.5(8)  | -3.3(7)   | 6.9(7)    | -6.1(8)   |
| C00V | 66.1(11) | 37.2(10) | 38.8(9)  | 1.4(7)    | -7.7(8)   | -11.7(8)  |
| C00W | 67.3(11) | 28.7(8)  | 43.9(10) | 2.7(7)    | -2.7(8)   | -4.5(8)   |
| C00X | 43.2(9)  | 56.6(11) | 41.8(10) | 12.2(9)   | 1.4(7)    | -4.9(8)   |
| C00Y | 48.7(10) | 47.9(11) | 69.1(13) | 4.6(9)    | -10.4(9)  | 8.3(9)    |
| C00Z | 51.2(11) | 86.3(16) | 68.8(14) | 33.7(13)  | -4.3(10)  | -0.4(11)  |
| C010 | 59.6(13) | 103(2)   | 63.4(14) | -10.6(13) | -3.4(11)  | -30.3(13) |
| C011 | 72.1(16) | 156(3)   | 74.0(17) | 49.9(19)  | -26.0(13) | -27.0(18) |

**Supplementary Table 38.** Bond Lengths for TPAOMe-TDPP-C4

| Atom | Atom | Length/Å   | Atom | Atom | Length/Å |
|------|------|------------|------|------|----------|
| S01  | C00D | 1.7380(15) | C00B | C00P | 1.386(2) |
| S01  | C00G | 1.7261(15) | C00C | C00L | 1.383(2) |
| O002 | C00A | 1.2292(17) | C00D | C00H | 1.380(2) |
| O003 | C00M | 1.3721(19) | C00E | C00L | 1.400(2) |
| O003 | C00Y | 1.418(2)   | C00E | C00O | 1.398(2) |
| O004 | C00R | 1.3687(19) | C00F | C00K | 1.389(2) |

## Supplementary Information

---

|                                 |                    |
|---------------------------------|--------------------|
| O004 C010 1.406(2)              | C00F C00T 1.379(2) |
| N005 C009 1.3882(18)            | C00G C00S 1.374(2) |
| N005 C00A 1.4222(19)            | C00H C00S 1.400(2) |
| N005 C00Q 1.4591(19)            | C00I C00O 1.377(2) |
| N006 C00E 1.3998(19)            | C00J C00W 1.390(2) |
| N006 C00F 1.429(2)              | C00K C00N 1.376(2) |
| N006 C00J 1.423(2)              | C00M C00P 1.382(2) |
| C007 C007 <sup>1</sup> 1.407(3) | C00M C00V 1.388(3) |
| C007 C009 1.394(2)              | C00N C00R 1.386(2) |
| C007 C00A <sup>1</sup> 1.441(2) | C00Q C00X 1.517(2) |
| C008 C00C 1.394(2)              | C00R C00U 1.386(2) |
| C008 C00G 1.465(2)              | C00T C00U 1.384(2) |
| C008 C00I 1.402(2)              | C00V C00W 1.375(2) |
| C009 C00D 1.440(2)              | C00X C00Z 1.513(3) |
| C00B C00J 1.385(2)              | C00Z C011 1.526(3) |

---

**Supplementary Table 39.** Bond Angles for TPAOMe-TDPP-C4.

| Atom | Atom | Atom | Angle/°    | Atom | Atom | Atom | Angle/°    |
|------|------|------|------------|------|------|------|------------|
| C00G | S01  | C00D | 92.60(7)   | C00T | C00F | N006 | 120.67(14) |
| C00M | O003 | C00Y | 116.67(14) | C00T | C00F | C00K | 119.06(15) |
| C00R | O004 | C010 | 117.33(15) | C008 | C00G | S01  | 121.71(11) |
| C009 | N005 | C00A | 111.45(12) | C00S | C00G | S01  | 110.28(11) |
| C009 | N005 | C00Q | 130.08(12) | C00S | C00G | C008 | 128.01(14) |
| C00A | N005 | C00Q | 118.38(12) | C00D | C00H | C00S | 113.52(14) |

## Supplementary Information

---

|                   |      |                   |            |      |      |      |            |
|-------------------|------|-------------------|------------|------|------|------|------------|
| C00E              | N006 | C00F              | 119.92(12) | C00O | C00I | C008 | 121.58(14) |
| C00E              | N006 | C00J              | 121.70(13) | C00B | C00J | N006 | 120.89(14) |
| C00J              | N006 | C00F              | 118.38(12) | C00B | C00J | C00W | 118.33(15) |
| C007 <sup>1</sup> | C007 | C00A <sup>1</sup> | 108.09(16) | C00W | C00J | N006 | 120.78(15) |
| C009              | C007 | C007 <sup>1</sup> | 109.62(16) | C00N | C00K | C00F | 120.25(15) |
| C009              | C007 | C00A <sup>1</sup> | 142.30(13) | C00C | C00L | C00E | 120.57(14) |
| C00C              | C008 | C00G              | 123.07(13) | O003 | C00M | C00P | 125.00(15) |
| C00C              | C008 | C00I              | 117.33(14) | O003 | C00M | C00V | 115.76(15) |
| C00I              | C008 | C00G              | 119.60(13) | C00P | C00M | C00V | 119.24(15) |
| N005              | C009 | C007              | 106.52(12) | C00K | C00N | C00R | 120.39(15) |
| N005              | C009 | C00D              | 126.47(13) | C00I | C00O | C00E | 120.75(14) |
| C007              | C009 | C00D              | 127.01(13) | C00M | C00P | C00B | 120.08(15) |
| O002              | C00A | N005              | 121.63(13) | N005 | C00Q | C00X | 113.43(14) |
| O002              | C00A | C007 <sup>1</sup> | 134.04(14) | O004 | C00R | C00N | 115.50(15) |
| N005              | C00A | C007 <sup>1</sup> | 104.33(12) | O004 | C00R | C00U | 124.71(15) |
| C00J              | C00B | C00P              | 120.97(15) | C00U | C00R | C00N | 119.79(15) |
| C00L              | C00C | C008              | 121.62(14) | C00G | C00S | C00H | 113.79(14) |
| C009              | C00D | S01               | 126.67(11) | C00F | C00T | C00U | 121.20(15) |
| C00H              | C00D | S01               | 109.80(11) | C00T | C00U | C00R | 119.30(15) |
| C00H              | C00D | C009              | 123.47(14) | C00W | C00V | C00M | 120.34(16) |

## Supplementary Information

|      |      |      |            |      |      |      |            |
|------|------|------|------------|------|------|------|------------|
| N006 | C00E | C00L | 121.62(14) | C00V | C00W | C00J | 120.98(16) |
| C00O | C00E | N006 | 120.23(14) | C00Z | C00X | C00Q | 112.42(17) |
| C00O | C00E | C00L | 118.15(14) | C00X | C00Z | C011 | 113.2(2)   |
| C00K | C00F | N006 | 120.27(14) |      |      |      |            |

**Supplementary Table 40.** Hydrogen Atom Coordinates ( $\text{\AA} \times 10^4$ ) and Isotropic Displacement Parameters ( $\text{\AA}^2 \times 10^3$ ) for TPAOMe-TDPP-C4.

| Atom | $x$     | $y$      | $z$     | $U(\text{eq})$ |
|------|---------|----------|---------|----------------|
| H00B | 6467.88 | 12618.53 | 3194.07 | 42             |
| H00C | 5039.77 | 6994.35  | 3842.99 | 38             |
| H00H | 6791.97 | 2402.12  | 5218.64 | 43             |
| H00I | 7792.34 | 6187.56  | 4115.13 | 39             |
| H00K | 8220.53 | 10935.57 | 2438.63 | 42             |
| H00L | 5340.76 | 9067.07  | 3420.15 | 40             |
| H00N | 9640.53 | 11949.06 | 2788.08 | 44             |
| H00O | 8100.63 | 8243.57  | 3683.37 | 41             |
| H00P | 5395.18 | 13745.04 | 2387.55 | 42             |
| H00A | 3577.73 | 3245.18  | 4207.98 | 43             |
| H00D | 2792.21 | 2218.22  | 4319.18 | 43             |
| H00S | 7439.66 | 4513.44  | 4926.04 | 44             |
| H00T | 7763.9  | 10739.57 | 4507.29 | 49             |
| H00U | 9183.4  | 11769.57 | 4864.48 | 50             |
| H00V | 4780.54 | 10373.93 | 1297.07 | 58             |
| H00W | 5894.17 | 9278.86  | 2071.77 | 57             |
| H00E | 3726.91 | 2340.76  | 3077.85 | 57             |
| H00F | 2987.64 | 1244.41  | 3191.4  | 57             |

## Supplementary Information

---

|      |          |          |         |     |
|------|----------|----------|---------|-----|
| H00G | 3592.26  | 14368.21 | 1010.92 | 85  |
| H00J | 4655.43  | 14595.57 | 1293.48 | 85  |
| H00M | 3947.77  | 14257.17 | 1840.11 | 85  |
| H00Q | 2611.87  | 3957.73  | 2964.36 | 84  |
| H00R | 1868.66  | 3021.07  | 3245.33 | 84  |
| H01A | 11353.01 | 13225.08 | 4769.21 | 115 |
| H01B | 10819.4  | 11960.67 | 4983.11 | 115 |
| H01C | 10324.82 | 13346.18 | 4957.87 | 115 |
| H01D | 2526.6   | 2661.37  | 1893.7  | 156 |
| H01E | 1558.65  | 3316.38  | 1979.99 | 156 |
| H01F | 1730.2   | 1817.31  | 2170.97 | 156 |

---

**Supplementary Table 41.** Solvent masks information for TPAOMe-TDPP-C4.

---

| Number | X     | Y     | Z     | Volume | Electron count | Content |
|--------|-------|-------|-------|--------|----------------|---------|
| 1      | 0.205 | 0.556 | 0.377 | 11.3   | 0.1            |         |
| 2      | 0.295 | 0.056 | 0.123 | 11.3   | 0.1            |         |
| 3      | 0.705 | 0.944 | 0.877 | 11.3   | 0.1            |         |
| 4      | 0.795 | 0.444 | 0.623 | 11.3   | 0.1            |         |

---

### 2.10. X-ray crystallographic data for Flu-TDPP-C8

**Supplementary Table 42.** Crystal data and structure refinement for Flu-TDPP-C8.

---

|                     |                                                                              |
|---------------------|------------------------------------------------------------------------------|
| Identification code | Flu-TDPP-C8                                                                  |
| Empirical formula   | C <sub>60</sub> H <sub>64</sub> N <sub>2</sub> O <sub>2</sub> S <sub>2</sub> |
| Formula weight      | 909.25                                                                       |
| Temperature/K       | 103(1)                                                                       |
| Crystal system      | orthorhombic                                                                 |
| Space group         | P2 <sub>1</sub> 2 <sub>1</sub> 2 <sub>1</sub>                                |
|                     | S93                                                                          |

## Supplementary Information

---

|                                                |                                                                   |
|------------------------------------------------|-------------------------------------------------------------------|
| a/Å                                            | 46.2686(12)                                                       |
| b/Å                                            | 14.7572(3)                                                        |
| c/Å                                            | 8.3418(2)                                                         |
| $\alpha/^\circ$                                | 90                                                                |
| $\beta/^\circ$                                 | 90                                                                |
| $\gamma/^\circ$                                | 90                                                                |
| Volume/Å <sup>3</sup>                          | 5695.7(2)                                                         |
| Z                                              | 4                                                                 |
| $\rho_{\text{calc}}/\text{cm}^3$               | 1.060                                                             |
| $\mu/\text{mm}^{-1}$                           | 1.147                                                             |
| F(000)                                         | 1944.0                                                            |
| Crystal size/mm <sup>3</sup>                   | 0.12 × 0.11 × 0.1                                                 |
| Radiation                                      | CuK $\alpha$ ( $\lambda = 1.54184$ )                              |
| 2 $\Theta$ range for data collection/ $^\circ$ | 6.286 to 148.264                                                  |
| Index ranges                                   | -53 ≤ h ≤ 57, -13 ≤ k ≤ 18, -9 ≤ l ≤ 5                            |
| Reflections collected                          | 18598                                                             |
| Independent reflections                        | 10160 [ $R_{\text{int}} = 0.0423$ , $R_{\text{sigma}} = 0.0587$ ] |
| Data/restraints/parameters                     | 10160/270/796                                                     |
| Goodness-of-fit on F <sup>2</sup>              | 1.042                                                             |
| Final R indexes [ $I \geq 2\sigma(I)$ ]        | $R_1 = 0.0963$ , $wR_2 = 0.2599$                                  |
| Final R indexes [all data]                     | $R_1 = 0.1105$ , $wR_2 = 0.2711$                                  |
| Largest diff. peak/hole / e Å <sup>-3</sup>    | 0.71/-0.63                                                        |
| Flack parameter                                | 0.487(15)                                                         |

---

**Supplementary Table 43.** Fractional Atomic Coordinates ( $\times 10^4$ ) and Equivalent Isotropic Displacement Parameters ( $\text{\AA}^2 \times 10^3$ ) for Flu-TDPP-C8.  $U_{\text{eq}}$  is defined as 1/3 of the trace of the orthogonalised  $U_{ij}$  tensor.

| Atom <i>x</i> | <i>y</i> | <i>z</i> | U(eq) |
|---------------|----------|----------|-------|
|---------------|----------|----------|-------|

## Supplementary Information

|      |            |            |           |          |
|------|------------|------------|-----------|----------|
| S1   | 5527.3(4)  | 7280.5(12) | 9587(2)   | 37.5(5)  |
| S2   | 4459.8(4)  | 7024.7(12) | 376(2)    | 37.5(5)  |
| C48  | 4068.4(15) | 5838(4)    | -5296(9)  | 26.9(14) |
| C52  | 3606.6(16) | 6213(5)    | -6103(8)  | 27.4(14) |
| C47  | 4348.1(15) | 5520(4)    | -5191(8)  | 26.6(14) |
| C49  | 3937.9(16) | 6283(5)    | -3999(8)  | 28.5(15) |
| C23  | 6048.4(16) | 7988(4)    | 13935(9)  | 28.7(15) |
| C51  | 3857.5(16) | 5827(5)    | -6615(8)  | 28.7(15) |
| C21  | 5639.9(16) | 8750(5)    | 15166(10) | 37.7(18) |
| C50  | 4094.8(16) | 6413(5)    | -2592(9)  | 30.8(15) |
| O1   | 5238(3)    | 5381(7)    | 4068(12)  | 44(2)    |
| C45  | 4372.5(16) | 6090(5)    | -2487(9)  | 31.4(16) |
| C19  | 5609.5(15) | 8212(4)    | 12391(8)  | 23.9(14) |
| C26  | 6360.3(16) | 7706(5)    | 14358(9)  | 31.5(16) |
| C20  | 5487.3(16) | 8662(5)    | 13714(9)  | 29.2(15) |
| C53  | 3632.2(17) | 6593(5)    | -4392(9)  | 34.0(16) |
| C2   | 4982.9(16) | 7461(4)    | 5648(8)   | 25.9(15) |
| C18  | 5439.0(15) | 8104(5)    | 10954(9)  | 28.9(15) |
| C27  | 6112.2(18) | 8831(5)    | 18086(9)  | 34.7(17) |
| C22  | 5920.1(15) | 8410(4)    | 15235(9)  | 26.6(14) |
| C24  | 6132.4(16) | 8462(5)    | 16548(9)  | 30.3(15) |
| C57  | 3368.1(18) | 6235(7)    | -7161(10) | 42(2)    |
| C46  | 4499.7(16) | 5639(5)    | -3806(9)  | 30.9(15) |
| C28  | 6358.1(17) | 8772(5)    | 19109(10) | 38.4(18) |
| C5   | 4999.1(15) | 6883(5)    | 4287(10)  | 31.0(16) |
| C41  | 4741.9(17) | 6747(5)    | 1639(10)  | 34.4(17) |
| C00T | 5895.1(16) | 7889(5)    | 12521(9)  | 31.1(16) |

## Supplementary Information

---

|      |            |          |           |          |
|------|------------|----------|-----------|----------|
| C54  | 3884.3(18) | 5450(5)  | -8140(10) | 37.2(18) |
| C58  | 3410.6(18) | 6141(5)  | -3268(9)  | 35.8(17) |
| C29  | 6608.6(18) | 8375(6)  | 18600(10) | 41.5(19) |
| C1   | 5181.5(17) | 7191(5)  | 6780(9)   | 32.9(16) |
| C17  | 5198.0(17) | 8581(5)  | 10463(10) | 34.7(16) |
| C31  | 6387.4(17) | 6644(5)  | 14326(10) | 36.3(17) |
| C16  | 5086.3(18) | 8295(5)  | 8963(9)   | 34.5(17) |
| C43  | 4787.4(16) | 5736(5)  | -481(9)   | 33.9(16) |
| C42  | 4892.8(16) | 6030(5)  | 983(9)    | 32.8(16) |
| C25  | 6389.8(16) | 8054(5)  | 16011(10) | 32.0(16) |
| C15  | 5244.8(17) | 7598(5)  | 8308(9)   | 33.2(16) |
| C4   | 4803.8(19) | 7158(5)  | 3136(10)  | 37.2(18) |
| C44  | 4545.2(16) | 6206(5)  | -1020(10) | 34.6(17) |
| C32  | 6580.3(17) | 8106(6)  | 13183(10) | 39.1(18) |
| C55  | 3649.7(19) | 5478(5)  | -9171(11) | 41.7(19) |
| C30  | 6629.8(18) | 8010(5)  | 17006(10) | 35.7(17) |
| C56  | 3394(2)    | 5867(7)  | -8635(10) | 46(2)    |
| C59  | 3601.5(18) | 7599(5)  | -4368(11) | 41.0(19) |
| N1   | 5272(3)    | 6305(8)  | 6310(16)  | 31(3)    |
| C6   | 5168(3)    | 6125(8)  | 4735(17)  | 31(3)    |
| O2   | 4751.8(16) | 8944(5)  | 5878(9)   | 23.7(17) |
| C3A  | 4724(6)    | 7910(30) | 5500(40)  | 54(8)    |
| C33  | 4542(2)    | 8673(8)  | 2719(15)  | 33(3)    |
| C7   | 5443(2)    | 5669(8)  | 7224(15)  | 33(3)    |
| C8   | 5767(2)    | 5771(9)  | 6981(15)  | 37(3)    |
| N2   | 4712(2)    | 8022(6)  | 3597(12)  | 23(2)    |
| C35A | 4018(3)    | 9263(11) | 2280(30)  | 40(5)    |



## Supplementary Information

---

|              |          |           |         |
|--------------|----------|-----------|---------|
| O2A 4605(4)  | 8461(10) | 6423(17)  | 43(4)   |
| C34A 4322(3) | 8888(11) | 2550(20)  | 35(4)   |
| C9A 5939(4)  | 4973(13) | 7640(30)  | 53(6)   |
| C10A 6137(4) | 5547(18) | 8700(30)  | 67(5)   |
| C13A 6811(5) | 5337(18) | 10850(30) | 72(7)   |
| C12A 6657(5) | 5820(20) | 9480(50)  | 114(11) |
| C14A 7133(5) | 5570(30) | 10890(60) | 95(15)  |
| N2A 4606(4)  | 7729(12) | 3990(20)  | 32(4)   |
| C11A 6446(5) | 5160(30) | 8650(40)  | 109(6)  |
| C33A 4320(4) | 8054(10) | 3635(19)  | 30(3)   |
| C36A 3834(3) | 8666(12) | 1190(20)  | 36(3)   |
| C37 3655(3)  | 8310(9)  | 770(20)   | 70(5)   |
| C39A 3078(6) | 8973(18) | -810(50)  | 94(13)  |
| C38A 3344(4) | 8469(15) | -150(40)  | 62(8)   |
| C40A 2874(9) | 8300(30) | -1640(90) | 180(30) |
| C37A 3537(3) | 9072(11) | 850(20)   | 33(3)   |
| C8A 5646(4)  | 5398(14) | 7360(30)  | 54(5)   |
| C7A 5664(5)  | 6249(16) | 6340(40)  | 62(7)   |
| C36 3744(3)  | 9157(10) | 1700(30)  | 82(6)   |
| N1A 5379(5)  | 6568(17) | 5950(30)  | 47(5)   |
| C6A 5266(5)  | 6350(15) | 4330(30)  | 27(5)   |
| O1A 5383(4)  | 5788(12) | 3510(20)  | 48(4)   |
| C3 4817(3)   | 8245(9)  | 5220(20)  | 29(3)   |
| C9 5933(2)   | 5191(13) | 8220(20)  | 64(5)   |
| C10 6250(3)  | 5480(20) | 8250(20)  | 116(9)  |
| C11 6409(3)  | 5263(19) | 9750(30)  | 109(6)  |
| C12 6677(4)  | 5851(15) | 9990(30)  | 106(7)  |

## Supplementary Information

|     |         |          |           |        |
|-----|---------|----------|-----------|--------|
| C13 | 6943(3) | 5297(18) | 10360(30) | 113(9) |
| C14 | 7127(5) | 5740(20) | 11670(30) | 96(10) |
| C34 | 4213(2) | 8567(9)  | 2860(15)  | 37(3)  |
| C35 | 4073(2) | 9256(10) | 1687(18)  | 52(4)  |
| C38 | 3324(3) | 8274(14) | 560(30)   | 102(9) |
| C39 | 3229(4) | 9018(15) | -590(30)  | 109(8) |
| C40 | 2922(4) | 8902(19) | -1170(30) | 103(8) |

**Supplementary Table 44.** Anisotropic Displacement Parameters ( $\text{\AA}^2 \times 10^3$ ) for Flu-TDPP-C8. The Anisotropic displacement factor exponent takes the form:  $-2\pi^2[h^2a^2U_{11}+2hka*b*U_{12}+\dots]$ .

| Atom | $U_{11}$ | $U_{22}$ | $U_{33}$ | $U_{23}$ | $U_{13}$ | $U_{12}$ |
|------|----------|----------|----------|----------|----------|----------|
| S1   | 50.9(11) | 27.9(8)  | 33.6(10) | -5.7(8)  | -11.0(9) | 4.6(8)   |
| S2   | 47.0(10) | 32.6(9)  | 32.9(10) | -6.8(8)  | -9.0(8)  | 6.3(8)   |
| C48  | 36(4)    | 23(3)    | 22(3)    | -1(3)    | -2(3)    | -3(3)    |
| C52  | 41(4)    | 26(3)    | 15(3)    | 7(3)     | -2(3)    | -3(3)    |
| C47  | 41(4)    | 16(3)    | 22(3)    | 0(3)     | 3(3)     | 0(3)     |
| C49  | 40(4)    | 31(3)    | 15(3)    | -5(3)    | -5(3)    | 2(3)     |
| C23  | 38(4)    | 14(3)    | 34(4)    | 4(3)     | -3(3)    | -2(3)    |
| C51  | 41(4)    | 28(3)    | 17(3)    | 3(3)     | 0(3)     | -7(3)    |
| C21  | 36(4)    | 38(4)    | 39(5)    | 11(3)    | 3(3)     | -3(3)    |
| C50  | 40(4)    | 22(3)    | 31(4)    | -4(3)    | 3(3)     | -6(3)    |
| O1   | 63(7)    | 32(5)    | 37(6)    | -9(4)    | -12(5)   | 2(5)     |
| C45  | 39(4)    | 26(3)    | 28(4)    | 4(3)     | 3(3)     | -3(3)    |
| C19  | 40(4)    | 17(3)    | 15(3)    | -5(2)    | 0(3)     | -4(3)    |
| C26  | 39(4)    | 30(4)    | 25(4)    | 0(3)     | 0(3)     | 4(3)     |
| C20  | 38(4)    | 22(3)    | 28(4)    | 5(3)     | -2(3)    | 0(3)     |
| C53  | 41(4)    | 31(4)    | 30(4)    | -3(3)    | 1(3)     | 1(3)     |
| C2   | 50(4)    | 18(3)    | 10(3)    | -3(2)    | -1(3)    | -5(3)    |

## Supplementary Information

---

|      |       |       |       |          |          |          |
|------|-------|-------|-------|----------|----------|----------|
| C18  | 36(4) | 29(3) | 22(4) | 6(3)     | -4(3)    | -9(3)    |
| C27  | 50(4) | 24(3) | 30(4) | 0(3)     | -3(3)    | 1(3)     |
| C22  | 41(4) | 11(3) | 28(4) | 3(3)     | 1(3)     | -3(2)    |
| C24  | 42(4) | 24(3) | 25(4) | 6(3)     | 2(3)     | -2(3)    |
| C57  | 36(4) | 57(5) | 34(5) | -5(4)    | -6(3)    | -1(4)    |
| C46  | 33(4) | 30(3) | 29(4) | -3(3)    | -3(3)    | -1(3)    |
| C28  | 40(2) | 39(2) | 36(2) | -0.1(13) | -0.7(13) | -0.5(13) |
| C5   | 32(4) | 27(3) | 34(4) | -1(3)    | -3(3)    | 3(3)     |
| C41  | 46(4) | 24(3) | 34(4) | 0(3)     | -2(3)    | -8(3)    |
| C00T | 40(4) | 30(4) | 24(4) | -15(3)   | -1(3)    | 1(3)     |
| C54  | 47(4) | 31(4) | 33(4) | -12(3)   | 0(3)     | -1(3)    |
| C58  | 47(4) | 30(4) | 30(4) | 0(3)     | -3(3)    | -2(3)    |
| C29  | 42(4) | 44(4) | 39(5) | 11(4)    | -6(3)    | 3(4)     |
| C1   | 46(4) | 29(4) | 24(4) | 3(3)     | -12(3)   | 5(3)     |
| C17  | 45(4) | 27(3) | 32(4) | -7(3)    | -8(3)    | -5(3)    |
| C31  | 46(4) | 26(3) | 37(5) | 2(3)     | 4(3)     | 3(3)     |
| C16  | 48(4) | 23(3) | 33(4) | 1(3)     | -9(3)    | 1(3)     |
| C43  | 39(4) | 33(4) | 29(4) | -3(3)    | -11(3)   | 4(3)     |
| C42  | 37(4) | 31(4) | 30(4) | 2(3)     | -8(3)    | 0(3)     |
| C25  | 38(4) | 21(3) | 37(4) | -5(3)    | -3(3)    | 0(3)     |
| C15  | 49(4) | 23(3) | 28(4) | 2(3)     | -3(3)    | 4(3)     |
| C4   | 55(5) | 22(3) | 34(4) | -7(3)    | -6(4)    | 2(3)     |
| C44  | 39(4) | 29(4) | 37(4) | 5(3)     | -3(3)    | -1(3)    |
| C32  | 35(4) | 50(5) | 32(4) | -10(4)   | 3(3)     | 6(3)     |
| C55  | 56(5) | 26(4) | 43(5) | 0(3)     | -8(4)    | 0(3)     |
| C30  | 43(4) | 32(4) | 32(4) | 0(3)     | -4(3)    | 0(3)     |
| C56  | 51(5) | 57(5) | 29(4) | -11(4)   | -11(4)   | -7(4)    |

## Supplementary Information

---

|      |         |         |         |         |          |          |
|------|---------|---------|---------|---------|----------|----------|
| C59  | 48(4)   | 31(4)   | 44(5)   | -2(4)   | -4(4)    | 3(3)     |
| N1   | 38(6)   | 25(6)   | 29(6)   | -14(4)  | -9(5)    | 10(5)    |
| C6   | 36(7)   | 25(6)   | 31(7)   | -16(5)  | -2(6)    | -4(5)    |
| O2   | 28(3)   | 17(2)   | 26(3)   | 3(2)    | -1(2)    | -2(2)    |
| C3A  | 51(17)  | 80(20)  | 33(16)  | -27(16) | -22(12)  | 6(15)    |
| C33  | 51(5)   | 21(5)   | 27(6)   | 11(4)   | -5(4)    | 0(4)     |
| C7   | 39(5)   | 22(5)   | 38(6)   | -11(4)  | -13(4)   | 7(4)     |
| C8   | 41(5)   | 42(7)   | 28(6)   | -5(5)   | -7(4)    | 11(4)    |
| N2   | 40(5)   | 9(4)    | 20(5)   | 4(3)    | -5(4)    | -9(4)    |
| C35A | 49(7)   | 37(7)   | 34(10)  | 9(6)    | -7(7)    | -7(6)    |
| O2A  | 65(10)  | 42(8)   | 22(7)   | -9(6)   | 1(7)     | 2(7)     |
| C34A | 50(7)   | 23(7)   | 31(10)  | -4(6)   | -5(6)    | -7(6)    |
| C9A  | 74(9)   | 46(8)   | 40(11)  | 19(8)   | 5(8)     | -6(7)    |
| C10A | 67(5)   | 67(5)   | 66(5)   | 0.2(14) | -0.4(14) | -0.5(13) |
| C13A | 50(11)  | 50(13)  | 115(19) | -38(13) | 7(10)    | -23(9)   |
| C12A | 59(12)  | 165(19) | 120(20) | -14(17) | 10(14)   | 9(13)    |
| C14A | 53(11)  | 60(20)  | 170(50) | 30(30)  | -10(14)  | -30(12)  |
| N2A  | 55(8)   | 18(8)   | 23(9)   | -7(7)   | 1(6)     | -4(6)    |
| C11A | 73(6)   | 145(12) | 108(13) | 5(13)   | -15(6)   | 18(6)    |
| C33A | 55(8)   | 20(7)   | 15(8)   | -10(5)  | 2(6)     | -2(5)    |
| C36A | 36(3)   | 35(3)   | 36(4)   | 0.1(13) | -0.4(13) | 1.1(13)  |
| C37  | 76(8)   | 39(7)   | 96(13)  | 31(7)   | 6(8)     | 1(6)     |
| C39A | 67(15)  | 84(18)  | 130(30) | 10(18)  | -47(18)  | -11(13)  |
| C38A | 65(11)  | 52(10)  | 69(17)  | -11(11) | -25(11)  | -7(10)   |
| C40A | 110(30) | 120(30) | 300(80) | -60(40) | -120(40) | 10(20)   |
| C37A | 33(3)   | 32(3)   | 33(3)   | 0.6(13) | 0.5(13)  | 0.3(13)  |
| C8A  | 77(9)   | 43(10)  | 44(13)  | -10(8)  | -7(8)    | -4(8)    |

## Supplementary Information

|     |         |         |         |          |          |         |
|-----|---------|---------|---------|----------|----------|---------|
| C7A | 56(10)  | 59(12)  | 71(16)  | 12(11)   | 0(9)     | 5(8)    |
| C36 | 61(6)   | 58(8)   | 128(16) | 8(9)     | -12(7)   | 12(6)   |
| N1A | 56(10)  | 46(13)  | 38(13)  | -22(9)   | -8(9)    | 4(9)    |
| C6A | 27(5)   | 27(5)   | 27(5)   | -0.5(14) | -0.4(13) | 0.3(13) |
| O1A | 57(10)  | 34(8)   | 54(11)  | -27(8)   | -18(8)   | 11(8)   |
| C3  | 31(7)   | 18(6)   | 38(8)   | 6(6)     | -4(6)    | 1(5)    |
| C9  | 49(6)   | 103(13) | 40(9)   | 22(8)    | 5(6)     | 40(7)   |
| C10 | 43(6)   | 210(30) | 99(13)  | 24(14)   | 7(6)     | 32(9)   |
| C11 | 73(6)   | 145(12) | 108(13) | 5(13)    | -15(6)   | 18(6)   |
| C12 | 96(9)   | 160(15) | 62(13)  | -79(12)  | 10(8)    | 4(9)    |
| C13 | 89(9)   | 170(20) | 84(14)  | -61(14)  | 8(11)    | -3(12)  |
| C14 | 116(16) | 100(20) | 77(15)  | -23(14)  | -11(12)  | -2(14)  |
| C34 | 52(5)   | 32(6)   | 29(7)   | 5(5)     | 1(5)     | 4(5)    |
| C35 | 60(6)   | 64(9)   | 32(8)   | 12(6)    | -3(6)    | 18(5)   |
| C38 | 84(9)   | 91(14)  | 130(20) | 0(13)    | -22(11)  | -15(9)  |
| C39 | 117(15) | 88(14)  | 120(20) | -14(13)  | -32(14)  | 3(12)   |
| C40 | 116(15) | 100(18) | 93(18)  | 11(15)   | -25(13)  | -8(13)  |

**Supplementary Table 45.** Bond Lengths for Flu-TDPP-C8.

| Atom | Atom | Length/Å  | Atom | Atom | Length/Å  |
|------|------|-----------|------|------|-----------|
| S1   | C18  | 1.716(8)  | C1   | N1   | 1.428(14) |
| S1   | C15  | 1.751(8)  | C1   | N1A  | 1.47(2)   |
| S2   | C41  | 1.727(8)  | C17  | C16  | 1.418(11) |
| S2   | C44  | 1.724(8)  | C16  | C15  | 1.377(11) |
| C48  | C47  | 1.379(10) | C43  | C42  | 1.385(10) |
| C48  | C49  | 1.402(10) | C43  | C44  | 1.392(10) |
| C48  | C51  | 1.471(10) | C25  | C30  | 1.388(11) |

## Supplementary Information

---

|     |      |           |      |      |           |
|-----|------|-----------|------|------|-----------|
| C52 | C51  | 1.362(10) | C4   | N2   | 1.398(12) |
| C52 | C53  | 1.537(10) | C4   | N2A  | 1.433(18) |
| C52 | C57  | 1.414(10) | C55  | C56  | 1.388(12) |
| C47 | C46  | 1.363(10) | N1   | C6   | 1.424(19) |
| C49 | C50  | 1.393(10) | N1   | C7   | 1.445(14) |
| C49 | C53  | 1.522(10) | O2   | C3   | 1.207(17) |
| C23 | C26  | 1.543(10) | C3A  | O2A  | 1.25(3)   |
| C23 | C22  | 1.384(10) | C3A  | N2A  | 1.40(3)   |
| C23 | C00T | 1.384(10) | C33  | N2   | 1.441(12) |
| C51 | C54  | 1.394(10) | C33  | C34  | 1.537(11) |
| C21 | C20  | 1.409(11) | C7   | C8   | 1.520(11) |
| C21 | C22  | 1.391(10) | C8   | C9   | 1.548(11) |
| C50 | C45  | 1.373(11) | N2   | C3   | 1.48(2)   |
| O1  | C6   | 1.273(15) | C35A | C34A | 1.532(12) |
| C45 | C46  | 1.414(10) | C35A | C36A | 1.522(12) |
| C45 | C44  | 1.471(11) | C34A | C33A | 1.526(12) |
| C19 | C20  | 1.407(9)  | C9A  | C10A | 1.527(13) |
| C19 | C18  | 1.444(9)  | C9A  | C8A  | 1.514(12) |
| C19 | C00T | 1.409(10) | C10A | C11A | 1.540(13) |
| C26 | C31  | 1.571(10) | C13A | C12A | 1.526(13) |
| C26 | C25  | 1.478(11) | C13A | C14A | 1.531(13) |
| C26 | C32  | 1.532(11) | C12A | C11A | 1.536(13) |
| C53 | C58  | 1.541(11) | N2A  | C33A | 1.438(19) |
| C53 | C59  | 1.492(10) | C36A | C37A | 1.529(11) |
| C2  | C5   | 1.422(9)  | C37  | C36  | 1.527(12) |
| C2  | C1   | 1.376(10) | C37  | C38  | 1.543(12) |
| C2  | C3A  | 1.37(3)   | C39A | C38A | 1.540(13) |

## Supplementary Information

---

|     |     |           |      |      |           |
|-----|-----|-----------|------|------|-----------|
| C2  | C3  | 1.435(15) | C39A | C40A | 1.539(13) |
| C18 | C17 | 1.380(10) | C38A | C37A | 1.510(12) |
| C27 | C24 | 1.397(11) | C8A  | C7A  | 1.520(13) |
| C27 | C28 | 1.425(11) | C7A  | N1A  | 1.44(2)   |
| C22 | C24 | 1.473(10) | C36  | C35  | 1.527(11) |
| C24 | C25 | 1.408(10) | N1A  | C6A  | 1.49(3)   |
| C57 | C56 | 1.350(12) | C6A  | O1A  | 1.20(3)   |
| C28 | C29 | 1.366(12) | C9   | C10  | 1.527(12) |
| C5  | C4  | 1.380(11) | C10  | C11  | 1.489(12) |
| C5  | C6  | 1.415(14) | C11  | C12  | 1.526(12) |
| C5  | C6A | 1.46(2)   | C12  | C13  | 1.512(13) |
| C41 | C42 | 1.380(11) | C13  | C14  | 1.532(12) |
| C41 | C4  | 1.418(11) | C34  | C35  | 1.553(11) |
| C54 | C55 | 1.386(12) | C38  | C39  | 1.526(13) |
| C29 | C30 | 1.438(12) | C39  | C40  | 1.508(12) |
| C1  | C15 | 1.439(11) |      |      |           |

---

**Supplementary Table 46.** Bond Angles for Flu-TDPP-C8.

| Atom | Atom | Atom | Angle/°  | Atom | Atom | Atom | Angle/°  |
|------|------|------|----------|------|------|------|----------|
| C18  | S1   | C15  | 92.2(3)  | C18  | C17  | C16  | 113.9(7) |
| C44  | S2   | C41  | 94.1(4)  | C15  | C16  | C17  | 112.2(7) |
| C47  | C48  | C49  | 120.9(7) | C42  | C43  | C44  | 114.3(7) |
| C47  | C48  | C51  | 131.8(7) | C41  | C42  | C43  | 114.3(7) |
| C49  | C48  | C51  | 107.3(6) | C24  | C25  | C26  | 111.5(7) |
| C51  | C52  | C53  | 112.2(6) | C30  | C25  | C26  | 128.0(7) |
| C51  | C52  | C57  | 118.6(7) | C30  | C25  | C24  | 120.4(7) |
| C57  | C52  | C53  | 129.2(7) | C1   | C15  | S1   | 125.5(6) |

## Supplementary Information

---

|      |     |      |          |     |     |     |           |
|------|-----|------|----------|-----|-----|-----|-----------|
| C46  | C47 | C48  | 119.5(7) | C16 | C15 | S1  | 110.8(6)  |
| C48  | C49 | C53  | 112.0(6) | C16 | C15 | C1  | 123.7(7)  |
| C50  | C49 | C48  | 119.4(7) | C5  | C4  | C41 | 128.2(7)  |
| C50  | C49 | C53  | 128.6(7) | C5  | C4  | N2  | 106.0(7)  |
| C22  | C23 | C26  | 110.1(6) | C5  | C4  | N2A | 104.2(9)  |
| C22  | C23 | C00T | 119.7(7) | C41 | C4  | N2A | 124.1(9)  |
| C00T | C23 | C26  | 130.2(7) | N2  | C4  | C41 | 124.9(8)  |
| C52  | C51 | C48  | 109.0(6) | C45 | C44 | S2  | 121.2(6)  |
| C52  | C51 | C54  | 122.0(7) | C43 | C44 | S2  | 108.4(6)  |
| C54  | C51 | C48  | 128.9(7) | C43 | C44 | C45 | 130.4(7)  |
| C22  | C21 | C20  | 118.0(8) | C54 | C55 | C56 | 118.7(8)  |
| C45  | C50 | C49  | 119.6(7) | C25 | C30 | C29 | 118.8(7)  |
| C50  | C45 | C46  | 120.2(7) | C57 | C56 | C55 | 122.4(8)  |
| C50  | C45 | C44  | 121.4(7) | C1  | N1  | C7  | 127.6(11) |
| C46  | C45 | C44  | 118.4(7) | C6  | N1  | C1  | 108.9(9)  |
| C20  | C19 | C18  | 118.9(6) | C6  | N1  | C7  | 123.4(11) |
| C20  | C19 | C00T | 118.5(6) | O1  | C6  | C5  | 135.0(12) |
| C00T | C19 | C18  | 122.6(6) | O1  | C6  | N1  | 118.6(12) |
| C23  | C26 | C31  | 109.9(6) | C5  | C6  | N1  | 106.4(9)  |
| C25  | C26 | C23  | 101.9(6) | C2  | C3A | N2A | 109(2)    |
| C25  | C26 | C31  | 110.8(6) | O2A | C3A | C2  | 130(2)    |
| C25  | C26 | C32  | 113.7(6) | O2A | C3A | N2A | 120(2)    |
| C32  | C26 | C23  | 111.8(6) | N2  | C33 | C34 | 115.6(9)  |
| C32  | C26 | C31  | 108.6(6) | N1  | C7  | C8  | 113.9(10) |
| C19  | C20 | C21  | 121.1(7) | C7  | C8  | C9  | 110.2(9)  |
| C52  | C53 | C58  | 110.9(6) | C4  | N2  | C33 | 129.3(10) |
| C49  | C53 | C52  | 99.3(6)  | C4  | N2  | C3  | 110.9(9)  |



## Supplementary Information

---

|     |     |     |           |      |      |      |           |
|-----|-----|-----|-----------|------|------|------|-----------|
| C49 | C53 | C58 | 110.9(6)  | C33  | N2   | C3   | 119.8(10) |
| C59 | C53 | C52 | 111.6(7)  | C36A | C35A | C34A | 113.1(11) |
| C59 | C53 | C49 | 112.6(7)  | C33A | C34A | C35A | 111.9(11) |
| C59 | C53 | C58 | 111.0(7)  | C8A  | C9A  | C10A | 113.3(12) |
| C5  | C2  | C3  | 108.2(8)  | C9A  | C10A | C11A | 109.5(12) |
| C1  | C2  | C5  | 109.8(6)  | C12A | C13A | C14A | 111.2(13) |
| C1  | C2  | C3  | 139.6(9)  | C13A | C12A | C11A | 110.0(13) |
| C3A | C2  | C5  | 105.3(12) | C4   | N2A  | C33A | 133.0(14) |
| C3A | C2  | C1  | 141.4(13) | C3A  | N2A  | C4   | 108.1(17) |
| C19 | C18 | S1  | 120.0(5)  | C3A  | N2A  | C33A | 118.7(18) |
| C17 | C18 | S1  | 110.9(5)  | C12A | C11A | C10A | 110.2(13) |
| C17 | C18 | C19 | 129.2(7)  | N2A  | C33A | C34A | 112.6(14) |
| C24 | C27 | C28 | 118.2(7)  | C35A | C36A | C37A | 112.7(11) |
| C23 | C22 | C21 | 122.0(7)  | C36  | C37  | C38  | 110.6(11) |
| C23 | C22 | C24 | 108.7(6)  | C40A | C39A | C38A | 109.8(13) |
| C21 | C22 | C24 | 129.3(7)  | C37A | C38A | C39A | 112.5(12) |
| C27 | C24 | C22 | 131.2(7)  | C38A | C37A | C36A | 113.8(11) |
| C27 | C24 | C25 | 121.0(7)  | C9A  | C8A  | C7A  | 112.3(12) |
| C25 | C24 | C22 | 107.8(6)  | N1A  | C7A  | C8A  | 110.2(19) |
| C56 | C57 | C52 | 119.3(8)  | C37  | C36  | C35  | 110.0(10) |
| C47 | C46 | C45 | 120.4(7)  | C1   | N1A  | C6A  | 110.3(15) |
| C29 | C28 | C27 | 121.1(8)  | C7A  | N1A  | C1   | 132(2)    |
| C2  | C5  | C6A | 110.4(10) | C7A  | N1A  | C6A  | 117(2)    |
| C4  | C5  | C2  | 110.1(6)  | C5   | C6A  | N1A  | 101.6(15) |
| C4  | C5  | C6  | 141.1(8)  | O1A  | C6A  | C5   | 137.5(19) |
| C4  | C5  | C6A | 136.6(11) | O1A  | C6A  | N1A  | 120.5(19) |
| C6  | C5  | C2  | 107.0(7)  | C2   | C3   | N2   | 103.0(10) |

## Supplementary Information

|     |      |     |           |     |     |     |           |
|-----|------|-----|-----------|-----|-----|-----|-----------|
| C42 | C41  | S2  | 108.8(6)  | O2  | C3  | C2  | 135.2(15) |
| C42 | C41  | C4  | 125.1(7)  | O2  | C3  | N2  | 121.8(12) |
| C4  | C41  | S2  | 126.0(6)  | C10 | C9  | C8  | 109.3(10) |
| C23 | C00T | C19 | 120.7(6)  | C11 | C10 | C9  | 115.3(12) |
| C55 | C54  | C51 | 119.0(8)  | C10 | C11 | C12 | 112.7(12) |
| C28 | C29  | C30 | 120.4(8)  | C13 | C12 | C11 | 112.5(12) |
| C2  | C1   | C15 | 128.5(7)  | C12 | C13 | C14 | 111.5(12) |
| C2  | C1   | N1  | 105.8(8)  | C33 | C34 | C35 | 107.4(8)  |
| C2  | C1   | N1A | 105.9(10) | C36 | C35 | C34 | 110.4(10) |
| C15 | C1   | N1A | 123.5(10) | C39 | C38 | C37 | 109.5(11) |
| N1  | C1   | C15 | 124.4(8)  | C40 | C39 | C38 | 113.2(12) |

**Supplementary Table 47.** Torsion Angles for Flu-TDPP-C8.

| A   | B   | C   | D   | Angle/°   | A    | B   | C   | D    | Angle/°    |
|-----|-----|-----|-----|-----------|------|-----|-----|------|------------|
| S1  | C18 | C17 | C16 | -1.2(8)   | C41  | S2  | C44 | C43  | 0.2(6)     |
| S2  | C41 | C42 | C43 | 1.1(8)    | C41  | C4  | N2  | C33  | -0.3(18)   |
| S2  | C41 | C4  | C5  | 170.0(7)  | C41  | C4  | N2  | C3   | -179.3(10) |
| S2  | C41 | C4  | N2  | -22.0(13) | C41  | C4  | N2A | C3A  | 172.0(19)  |
| S2  | C41 | C4  | N2A | 14.4(15)  | C41  | C4  | N2A | C33A | -2(3)      |
| C48 | C47 | C46 | C45 | -0.4(10)  | C00T | C23 | C26 | C31  | -65.4(10)  |
| C48 | C49 | C50 | C45 | -1.2(11)  | C00T | C23 | C26 | C25  | 177.0(7)   |
| C48 | C49 | C53 | C52 | 2.3(7)    | C00T | C23 | C26 | C32  | 55.3(10)   |
| C48 | C49 | C53 | C58 | 119.0(7)  | C00T | C23 | C22 | C21  | -0.6(10)   |
| C48 | C49 | C53 | C59 | -115.9(8) | C00T | C23 | C22 | C24  | -177.5(6)  |
| C48 | C51 | C54 | C55 | 176.6(7)  | C00T | C19 | C20 | C21  | -3.2(10)   |
| C52 | C51 | C54 | C55 | 0.8(11)   | C00T | C19 | C18 | S1   | 21.0(9)    |
| C52 | C57 | C56 | C55 | -1.3(14)  | C00T | C19 | C18 | C17  | -159.6(7)  |

## Supplementary Information

---

|                           |                           |
|---------------------------|---------------------------|
| C47 C48 C49 C50 0.8(10)   | C54 C55 C56 C57 1.5(13)   |
| C47 C48 C49 C53 178.8(6)  | C1 C2 C5 C4 -179.0(7)     |
| C47 C48 C51 C52 178.7(7)  | C1 C2 C5 C6 12.6(10)      |
| C47 C48 C51 C54 2.5(13)   | C1 C2 C5 C6A -15.0(13)    |
| C49 C48 C47 C46 0.0(10)   | C1 C2 C3A O2A 22(6)       |
| C49 C48 C51 C52 -2.6(8)   | C1 C2 C3A N2A -164.4(13)  |
| C49 C48 C51 C54 -178.8(7) | C1 C2 C3 O2 -16(3)        |
| C49 C50 C45 C46 0.9(11)   | C1 C2 C3 N2 166.4(10)     |
| C49 C50 C45 C44 -179.5(7) | C1 N1 C6 O1 176.7(13)     |
| C23 C26 C25 C24 1.7(8)    | C1 N1 C6 C5 -3.5(15)      |
| C23 C26 C25 C30 -178.8(7) | C1 N1 C7 C8 -89.1(16)     |
| C23 C22 C24 C27 179.1(7)  | C1 N1A C6A C5 0(2)        |
| C23 C22 C24 C25 -0.6(8)   | C1 N1A C6A O1A -173(2)    |
| C51 C48 C47 C46 178.6(7)  | C17 C16 C15 S1 1.5(8)     |
| C51 C48 C49 C50 -178.1(6) | C17 C16 C15 C1 -178.9(7)  |
| C51 C48 C49 C53 -0.1(8)   | C31 C26 C25 C24 -115.2(7) |
| C51 C52 C53 C49 -4.0(7)   | C31 C26 C25 C30 64.4(10)  |
| C51 C52 C53 C58 -120.8(7) | C42 C41 C4 C5 -7.4(14)    |
| C51 C52 C53 C59 115.0(7)  | C42 C41 C4 N2 160.6(9)    |
| C51 C52 C57 C56 0.7(12)   | C42 C41 C4 N2A -163.0(12) |
| C51 C54 C55 C56 -1.3(12)  | C42 C43 C44 S2 0.4(9)     |
| C21 C22 C24 C27 2.4(12)   | C42 C43 C44 C45 -179.4(7) |
| C21 C22 C24 C25 -177.3(7) | C15 S1 C18 C19 -178.9(6)  |
| C50 C49 C53 C52 -179.9(7) | C15 S1 C18 C17 1.7(6)     |
| C50 C49 C53 C58 -63.2(10) | C15 C1 N1 C6 179.4(10)    |
| C50 C49 C53 C59 61.9(11)  | C15 C1 N1 C7 -1.2(19)     |
| C50 C45 C46 C47 -0.1(11)  | C15 C1 N1A C7A -3(3)      |

## Supplementary Information

---

|                            |                           |
|----------------------------|---------------------------|
| C50 C45 C44 S2 -20.3(10)   | C15 C1 N1A C6A -173.6(14) |
| C50 C45 C44 C43 159.5(8)   | C4 C5 C6 O1 12(3)         |
| C19 C18 C17 C16 179.4(7)   | C4 C5 C6 N1 -167.7(11)    |
| C26 C23 C22 C21 178.7(6)   | C4 C5 C6A N1A 166.4(14)   |
| C26 C23 C22 C24 1.7(7)     | C4 C5 C6A O1A -22(4)      |
| C26 C23 C00T C19 -179.2(7) | C4 C41 C42 C43 178.9(8)   |
| C26 C25 C30 C29 -178.4(7)  | C4 N2 C3 C2 1.5(13)       |
| C20 C21 C22 C23 -0.6(10)   | C4 N2 C3 O2 -176.8(12)    |
| C20 C21 C22 C24 175.6(6)   | C4 N2A C33A C34A -83(2)   |
| C20 C19 C18 S1 -159.4(5)   | C44 S2 C41 C42 -0.8(6)    |
| C20 C19 C18 C17 19.9(11)   | C44 S2 C41 C4 -178.5(7)   |
| C20 C19 C00T C23 2.0(10)   | C44 C45 C46 C47 -179.8(6) |
| C53 C52 C51 C48 4.3(8)     | C44 C43 C42 C41 -1.0(10)  |
| C53 C52 C51 C54 -179.2(7)  | C32 C26 C25 C24 122.1(7)  |
| C53 C52 C57 C56 179.2(8)   | C32 C26 C25 C30 -58.3(10) |
| C53 C49 C50 C45 -178.8(7)  | N1 C1 C15 S1 21.6(13)     |
| C2 C5 C4 C41 -176.9(8)     | N1 C1 C15 C16 -158.0(10)  |
| C2 C5 C4 N2 13.3(10)       | N1 C7 C8 C9 169.7(13)     |
| C2 C5 C4 N2A -17.6(11)     | C6 C5 C4 C41 -15(2)       |
| C2 C5 C6 O1 174.5(17)      | C6 C5 C4 N2 175.4(14)     |
| C2 C5 C6 N1 -5.2(13)       | C6 N1 C7 C8 90.3(16)      |
| C2 C5 C6A N1A 8.5(19)      | C3A C2 C5 C4 17.1(19)     |
| C2 C5 C6A O1A -180(3)      | C3A C2 C5 C6A -179(2)     |
| C2 C1 C15 S1 -172.9(7)     | C3A C2 C1 C15 -28(3)      |
| C2 C1 C15 C16 7.5(13)      | C3A C2 C1 N1A 169(3)      |
| C2 C1 N1 C6 11.1(13)       | C3A N2A C33A C34A 104(3)  |
| C2 C1 N1 C7 -169.4(12)     | C33 N2 C3 C2 -177.6(10)   |

## Supplementary Information

---

|                          |                             |
|--------------------------|-----------------------------|
| C2 C1 N1A C7A 162(2)     | C33 N2 C3 O2 4.2(19)        |
| C2 C1 N1A C6A -9(2)      | C33 C34 C35 C36 177.2(12)   |
| C2 C3AN2A C4 -1(3)       | C7 N1 C6 O1 -3(2)           |
| C2 C3AN2A C33A 173.7(19) | C7 N1 C6 C5 177.0(12)       |
| C18S1 C15 C1 178.6(7)    | C7 C8 C9 C10 -165.4(16)     |
| C18S1 C15 C16 -1.8(6)    | C8 C9 C10 C11 158(2)        |
| C18C19 C20 C21 177.2(6)  | N2 C33 C34 C35 -173.7(11)   |
| C18C19 C00TC23 -178.5(6) | C35AC34AC33AN2A -176.1(14)  |
| C18C17 C16 C15 -0.2(10)  | C35AC36AC37AC38A -177(2)    |
| C27C24 C25 C26 179.5(7)  | O2A C3A N2A C4 173(3)       |
| C27C24 C25 C30 -0.1(11)  | O2A C3A N2A C33A -12(5)     |
| C27C28 C29 C30 0.4(12)   | C34AC35AC36AC37A -176.7(16) |
| C22C23 C26 C31 115.4(6)  | C9A C10AC11AC12A 170(2)     |
| C22C23 C26 C25 -2.1(7)   | C9A C8A C7A N1A 173(2)      |
| C22C23 C26 C32 -123.9(6) | C10AC9A C8A C7A 68(3)       |
| C22C23 C00TC19 -0.1(10)  | C13AC12AC11AC10A 122(3)     |
| C22C21 C20 C19 2.6(10)   | C14AC13AC12AC11A 138(3)     |
| C22C24 C25 C26 -0.8(8)   | C36AC35AC34AC33A -72(2)     |
| C22C24 C25 C30 179.6(7)  | C37 C36 C35 C34 -75.4(17)   |
| C24C27 C28 C29 0.6(11)   | C37 C38 C39 C40 166(2)      |
| C24C25 C30 C29 1.1(11)   | C39AC38AC37AC36A -167(3)    |
| C57C52 C51 C48 -177.0(7) | C40AC39AC38AC37A -173(4)    |
| C57C52 C51 C54 -0.5(11)  | C8A C9A C10AC11A -169(3)    |
| C57C52 C53 C49 177.5(8)  | C8A C7A N1A C1 89(3)        |
| C57C52 C53 C58 60.7(10)  | C8A C7A N1A C6A -101(3)     |
| C57C52 C53 C59 -63.6(10) | C7A N1A C6A C5 -172(2)      |
| C46C45 C44 S2 159.4(6)   | C7A N1A C6A O1A 14(4)       |

## Supplementary Information

---

|                           |                            |
|---------------------------|----------------------------|
| C46 C45 C44 C43 -20.8(12) | C36 C37 C38 C39 69(2)      |
| C28 C27 C24 C22 179.6(7)  | N1A C1 C15 S1 -12.0(17)    |
| C28 C27 C24 C25 -0.8(11)  | N1A C1 C15 C16 168.5(14)   |
| C28 C29 C30 C25 -1.2(12)  | C6A C5 C4 C41 25(2)        |
| C5 C2 C1 C15 177.9(8)     | C6A C5 C4 N2A -175.6(17)   |
| C5 C2 C1 N1 -14.5(10)     | C3 C2 C5 C4 -12.7(10)      |
| C5 C2 C1 N1A 14.3(13)     | C3 C2 C5 C6 178.9(10)      |
| C5 C2 C3A O2A 177(4)      | C3 C2 C1 C15 18.2(17)      |
| C5 C2 C3A N2A -9(3)       | C3 C2 C1 N1 -174.2(13)     |
| C5 C2 C3 O2 -175.6(15)    | C9 C10 C11 C12 -159(2)     |
| C5 C2 C3 N2 6.5(11)       | C10 C11 C12 C13 -130(2)    |
| C5 C4 N2 C33 169.9(11)    | C11 C12 C13 C14 -139(2)    |
| C5 C4 N2 C3 -9.0(12)      | C34 C33 N2 C4 86.4(16)     |
| C5 C4 N2A C3A 12(2)       | C34 C33 N2 C3 -94.7(14)    |
| C5 C4 N2A C33A -162.5(19) | C38 C37 C36 C35 -171.7(13) |
| C41 S2 C44 C45 -179.9(6)  |                            |

---

**Supplementary Table 48.** Hydrogen Atom Coordinates ( $\text{\AA} \times 10^4$ ) and Isotropic Displacement Parameters ( $\text{\AA}^2 \times 10^3$ ) for Flu-TDPP-C8.

| Atom | $x$     | $y$     | $z$      | U(eq) |
|------|---------|---------|----------|-------|
| H47  | 4432.69 | 5226.75 | -6058.44 | 32    |
| H21  | 5555.96 | 9026.56 | 16053.25 | 45    |
| H50  | 4012.03 | 6716.86 | -1730.22 | 37    |
| H20  | 5302.54 | 8905.83 | 13627.94 | 35    |
| H27  | 5942.68 | 9106.83 | 18433.83 | 42    |
| H57  | 3194.94 | 6500.92 | -6845.16 | 51    |
| H46  | 4687.94 | 5422.87 | -3727.53 | 37    |
| H28  | 6348    | 9008.28 | 20141.41 | 46    |

## Supplementary Information

---

|      |         |         |           |    |
|------|---------|---------|-----------|----|
| H00T | 5981.55 | 7606.93 | 11646.88  | 37 |
| H54  | 4057.03 | 5182.83 | -8459.79  | 45 |
| H58A | 3220.87 | 6191.86 | -3725.63  | 54 |
| H58B | 3414.06 | 6437.91 | -2244.39  | 54 |
| H58C | 3458.77 | 5513.07 | -3135.16  | 54 |
| H29  | 6766.31 | 8340.87 | 19288.16  | 50 |
| H17  | 5116.29 | 9046.81 | 11062.05  | 42 |
| H31A | 6279.32 | 6391.11 | 15199.84  | 54 |
| H31B | 6586.98 | 6475.99 | 14427.11  | 54 |
| H31C | 6312.5  | 6417.75 | 13330.17  | 54 |
| H16  | 4924.68 | 8549.97 | 8476.99   | 41 |
| H43  | 4871.43 | 5264.82 | -1056.61  | 41 |
| H42  | 5051.65 | 5766.49 | 1482.24   | 39 |
| H32A | 6531.71 | 7924.64 | 12110.75  | 59 |
| H32B | 6770.08 | 7887.9  | 13444.69  | 59 |
| H32C | 6577.16 | 8754.68 | 13256.2   | 59 |
| H55  | 3663.2  | 5241.59 | -10202.13 | 50 |
| H30  | 6801.15 | 7750.1  | 16648.82  | 43 |
| H56  | 3235    | 5873.05 | -9316.52  | 55 |
| H59A | 3742.99 | 7864.8  | -5065.45  | 62 |
| H59B | 3630.23 | 7817.04 | -3295.3   | 62 |
| H59C | 3411.33 | 7762.43 | -4726.5   | 62 |
| H33A | 4594.41 | 8632.93 | 1594.66   | 40 |
| H33B | 4594.25 | 9275.18 | 3085.93   | 40 |
| H7A  | 5386.99 | 5058.29 | 6927.47   | 39 |
| H7B  | 5399.84 | 5747.36 | 8353.47   | 39 |
| H8A  | 5821.11 | 6402.13 | 7097.94   | 44 |

## Supplementary Information

---

|              |         |          |     |
|--------------|---------|----------|-----|
| H8B 5818.28  | 5578.1  | 5905.92  | 44  |
| H35A 3921.4  | 9323.49 | 3308.9   | 48  |
| H35B 4032.17 | 9862    | 1810.75  | 48  |
| H34A 4407.34 | 8729.17 | 1527.7   | 42  |
| H34B 4441.73 | 9354    | 3037.13  | 42  |
| H9AA 6033.07 | 4877.2  | 6617.29  | 64  |
| H9AB 5912.9  | 4384.74 | 8142     | 64  |
| H10A 6065.62 | 5543.81 | 9796.37  | 80  |
| H10B 6137.78 | 6168.15 | 8323.28  | 80  |
| H13A 6788.68 | 4686.74 | 10738.19 | 86  |
| H13B 6723.07 | 5514.52 | 11862.36 | 86  |
| H12A 6798.13 | 6028.83 | 8703.49  | 137 |
| H12B 6552.09 | 6335.86 | 9882.5   | 137 |
| H14A 7219.45 | 5411.18 | 9879.57  | 142 |
| H14B 7226.01 | 5247.97 | 11736.2  | 142 |
| H14C 7155.56 | 6213.86 | 11058.47 | 142 |
| H11A 6450.32 | 4578.17 | 9196.68  | 130 |
| H11B 6504.24 | 5066.36 | 7550.16  | 130 |
| H33C 4222.76 | 8203.11 | 4630.31  | 36  |
| H33D 4211.2  | 7575.4  | 3115.4   | 36  |
| H36A 3810.09 | 8077.44 | 1693.39  | 43  |
| H36B 3935.54 | 8576.31 | 187.24   | 43  |
| H37A 3720.12 | 7774.56 | 1345.35  | 85  |
| H37B 3747.43 | 8312.82 | -271.49  | 85  |
| H39A 2977.21 | 9271.11 | 67.19    | 113 |
| H39B 3138.98 | 9433.11 | -1564.19 | 113 |
| H38A 3280.49 | 7961.21 | 498.13   | 75  |



## Supplementary Information

---

|              |         |          |     |
|--------------|---------|----------|-----|
| H38B 3455.28 | 8229.32 | -1040.61 | 75  |
| H40A 2678.61 | 8412.21 | -1307.06 | 264 |
| H40B 2927.08 | 7690.36 | -1347.66 | 264 |
| H40C 2888.72 | 8367.98 | -2779.27 | 264 |
| H37C 3441.03 | 9195    | 1862.68  | 39  |
| H37D 3561.83 | 9645.14 | 299.91   | 39  |
| H8AA 5559.6  | 5549.67 | 8387.49  | 65  |
| H8AB 5521.19 | 4961.2  | 6836.78  | 65  |
| H7AA 5768.41 | 6715.95 | 6915.57  | 75  |
| H7AB 5768.83 | 6117.03 | 5358.8   | 75  |
| H36C 3676.04 | 9112.51 | 2799.28  | 99  |
| H36D 3656.11 | 9687.06 | 1217.41  | 99  |
| H9A 5848.15  | 5270.35 | 9277.03  | 77  |
| H9B 5919.61  | 4554.86 | 7938.19  | 77  |
| H10C 6348.34 | 5198.56 | 7359.84  | 139 |
| H10D 6258    | 6133.97 | 8086.14  | 139 |
| H11C 6466.67 | 4631.33 | 9724.91  | 130 |
| H11D 6280.73 | 5344.3  | 10661.38 | 130 |
| H12C 6710.91 | 6200.93 | 9022.95  | 127 |
| H12D 6642.26 | 6273.07 | 10859.19 | 127 |
| H13C 7058.56 | 5230.52 | 9398.88  | 136 |
| H13D 6885.68 | 4696.86 | 10713.35 | 136 |
| H14D 7327.94 | 5675.65 | 11416.78 | 144 |
| H14E 7087.55 | 5458.56 | 12684.24 | 144 |
| H14F 7079.87 | 6376.08 | 11738.03 | 144 |
| H34C 4150.9  | 8689.5  | 3950.19  | 45  |
| H34D 4155.81 | 7954.57 | 2582.11  | 45  |

Supplementary Information

|              |         |          |     |
|--------------|---------|----------|-----|
| H35C 4124.84 | 9867.36 | 2000.02  | 62  |
| H35D 4144.77 | 9151.3  | 611.38   | 62  |
| H38C 3267.87 | 7686.65 | 145.3    | 123 |
| H38D 3230.71 | 8357.62 | 1594.05  | 123 |
| H39C 3246.01 | 9600.18 | -57.92   | 131 |
| H39D 3357.7  | 9022.65 | -1507.54 | 131 |
| H40D 2873.13 | 9394.9  | -1872.56 | 155 |
| H40E 2793.38 | 8898.51 | -271.02  | 155 |
| H40F 2905.73 | 8340.05 | -1743.23 | 155 |

**Supplementary Table 49.** Atomic Occupancy for Flu-TDPP-C8.

| Atom | Occupancy | Atom | Occupancy | Atom | Occupancy |
|------|-----------|------|-----------|------|-----------|
| O1   | 0.612(7)  | N1   | 0.612(7)  | C6   | 0.612(7)  |
| O2   | 0.612(7)  | C3A  | 0.388(7)  | C33  | 0.612(7)  |
| H33A | 0.612(7)  | H33B | 0.612(7)  | C7   | 0.612(7)  |
| H7A  | 0.612(7)  | H7B  | 0.612(7)  | C8   | 0.612(7)  |
| H8A  | 0.612(7)  | H8B  | 0.612(7)  | N2   | 0.612(7)  |
| C35A | 0.388(7)  | H35A | 0.388(7)  | H35B | 0.388(7)  |
| O2A  | 0.388(7)  | C34A | 0.388(7)  | H34A | 0.388(7)  |
| H34B | 0.388(7)  | C9A  | 0.388(7)  | H9AA | 0.388(7)  |
| H9AB | 0.388(7)  | C10A | 0.388(7)  | H10A | 0.388(7)  |
| H10B | 0.388(7)  | C13A | 0.388(7)  | H13A | 0.388(7)  |
| H13B | 0.388(7)  | C12A | 0.388(7)  | H12A | 0.388(7)  |
| H12B | 0.388(7)  | C14A | 0.388(7)  | H14A | 0.388(7)  |
| H14B | 0.388(7)  | H14C | 0.388(7)  | N2A  | 0.388(7)  |
| C11A | 0.388(7)  | H11A | 0.388(7)  | H11B | 0.388(7)  |
| C33A | 0.388(7)  | H33C | 0.388(7)  | H33D | 0.388(7)  |

## Supplementary Information

|               |               |      |          |
|---------------|---------------|------|----------|
| C36A 0.388(7) | H36A 0.388(7) | H36B | 0.388(7) |
| C37 0.612(7)  | H37A 0.612(7) | H37B | 0.612(7) |
| C39A 0.388(7) | H39A 0.388(7) | H39B | 0.388(7) |
| C38A 0.388(7) | H38A 0.388(7) | H38B | 0.388(7) |
| C40A 0.388(7) | H40A 0.388(7) | H40B | 0.388(7) |
| H40C 0.388(7) | C37A 0.388(7) | H37C | 0.388(7) |
| H37D 0.388(7) | C8A 0.388(7)  | H8AA | 0.388(7) |
| H8AB 0.388(7) | C7A 0.388(7)  | H7AA | 0.388(7) |
| H7AB 0.388(7) | C36 0.612(7)  | H36C | 0.612(7) |
| H36D 0.612(7) | N1A 0.388(7)  | C6A  | 0.388(7) |
| O1A 0.388(7)  | C3 0.612(7)   | C9   | 0.612(7) |
| H9A 0.612(7)  | H9B 0.612(7)  | C10  | 0.612(7) |
| H10C 0.612(7) | H10D 0.612(7) | C11  | 0.612(7) |
| H11C 0.612(7) | H11D 0.612(7) | C12  | 0.612(7) |
| H12C 0.612(7) | H12D 0.612(7) | C13  | 0.612(7) |
| H13C 0.612(7) | H13D 0.612(7) | C14  | 0.612(7) |
| H14D 0.612(7) | H14E 0.612(7) | H14F | 0.612(7) |
| C34 0.612(7)  | H34C 0.612(7) | H34D | 0.612(7) |
| C35 0.612(7)  | H35C 0.612(7) | H35D | 0.612(7) |
| C38 0.612(7)  | H38C 0.612(7) | H38D | 0.612(7) |
| C39 0.612(7)  | H39C 0.612(7) | H39D | 0.612(7) |
| C40 0.612(7)  | H40D 0.612(7) | H40E | 0.612(7) |
| H40F 0.612(7) |               |      |          |

**Supplementary Table 50.** Solvent masks information for Flu-TDPP-C8.

| Number | X     | Y     | Z      | Volume | Electron count | Content |
|--------|-------|-------|--------|--------|----------------|---------|
| 1      | 0.250 | 0.504 | -0.937 | 601.7  | 123.0          |         |

2      0.750      0.807      -0.932      601.7      123.0

## 2.11. $^1\text{H}$ , $^{13}\text{C}$ NMR and mass spectra

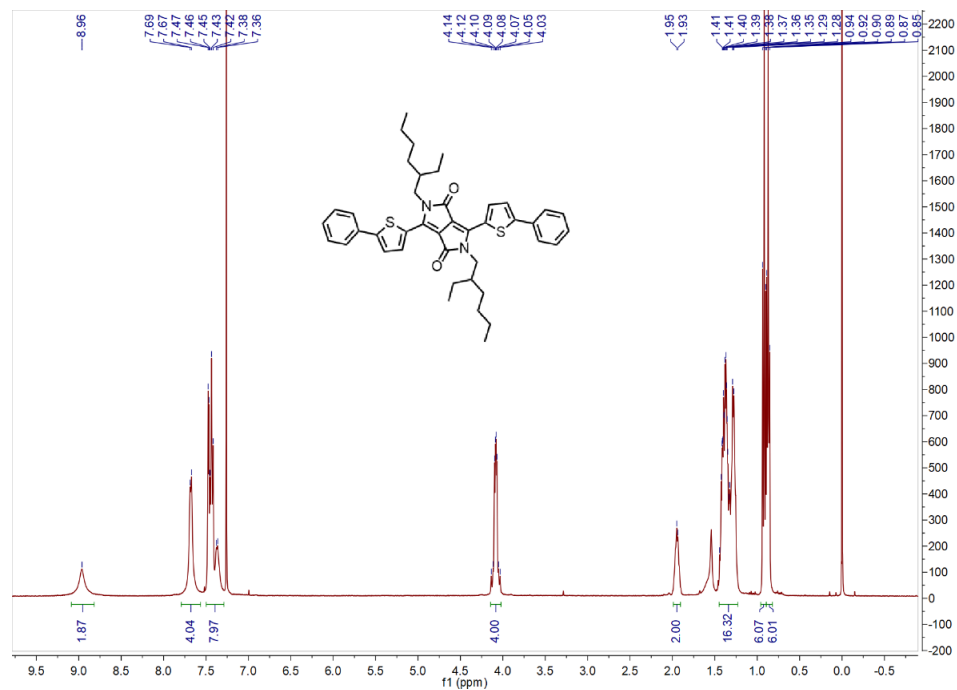

Supplementary Figure 34.  $^1\text{H}$  NMR of Ph-TDPP in Chloroform-*d*.

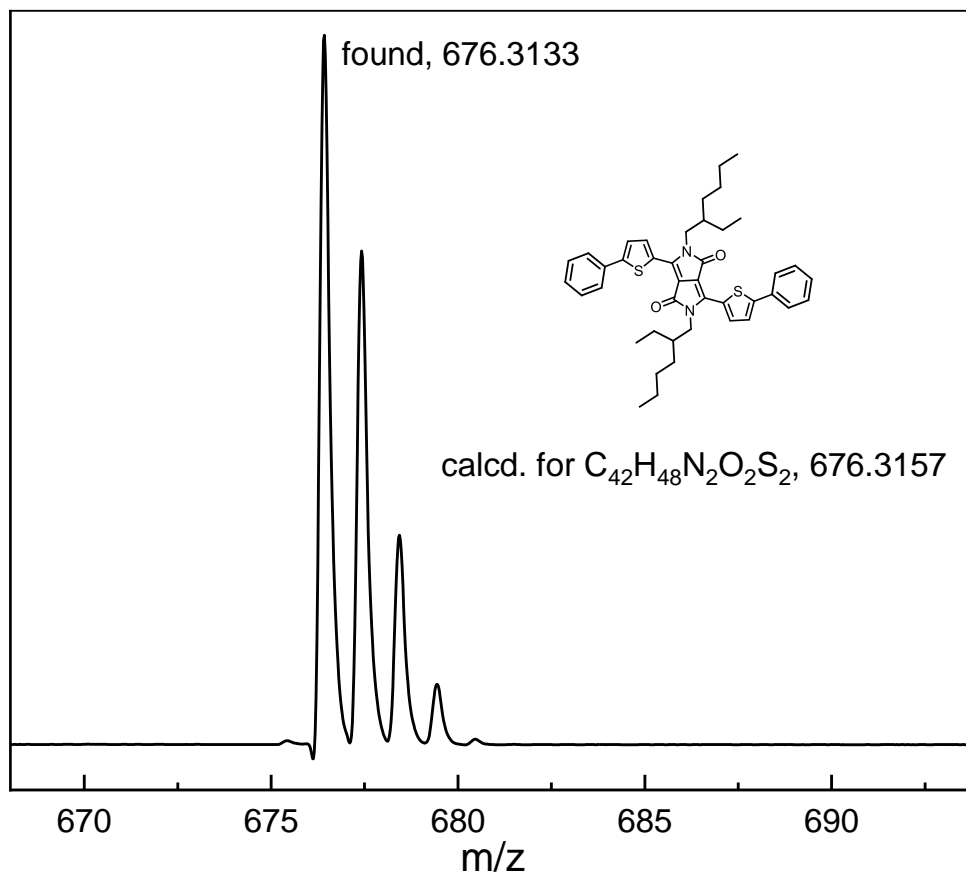

**Supplementary Figure 35.** MALDI-TOF-MS of Ph-TDPP. Calcd. for  $C_{42}H_{48}N_2O_2S_2$ :  $m/z$ : 676.3157. Found: 676.3426.

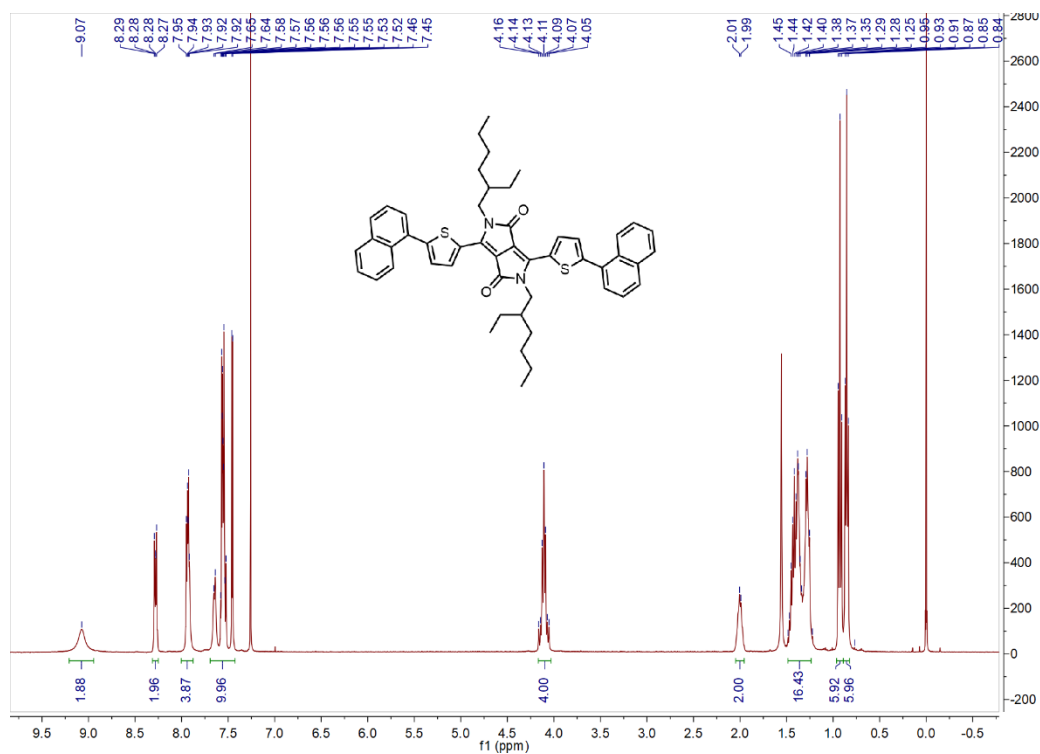

**Supplementary Figure 36.**  $^{13}C$  NMR of 1N-TDPP in Chloroform- $d$ .

Supplementary Information

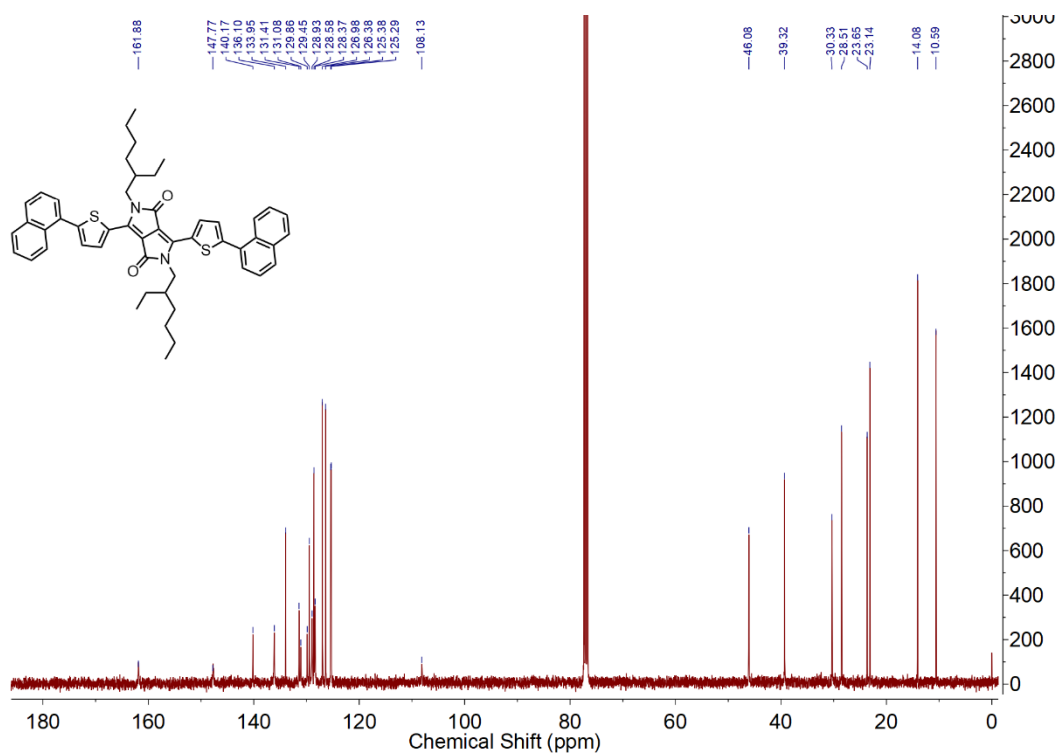

Supplementary Figure 37.  $^{13}\text{C}$  NMR of 1N-TDPP in Chloroform-*d*.

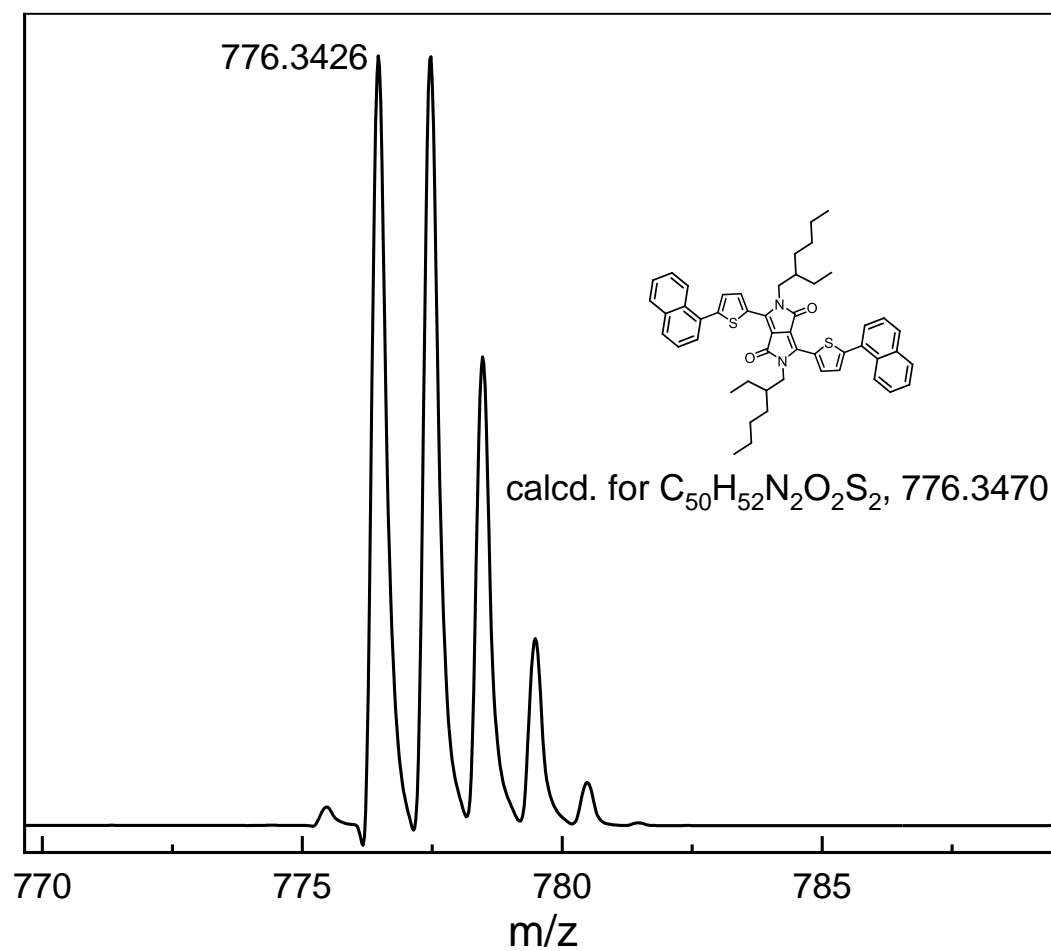

## Supplementary Information

**Supplementary Figure 38.** MALDI-TOF-MS of 1N-TDPP. Calcd. for  $C_{50}H_{52}N_2O_2S_2$ :  $m/z$ : 776.3470. Found: 776.3426.

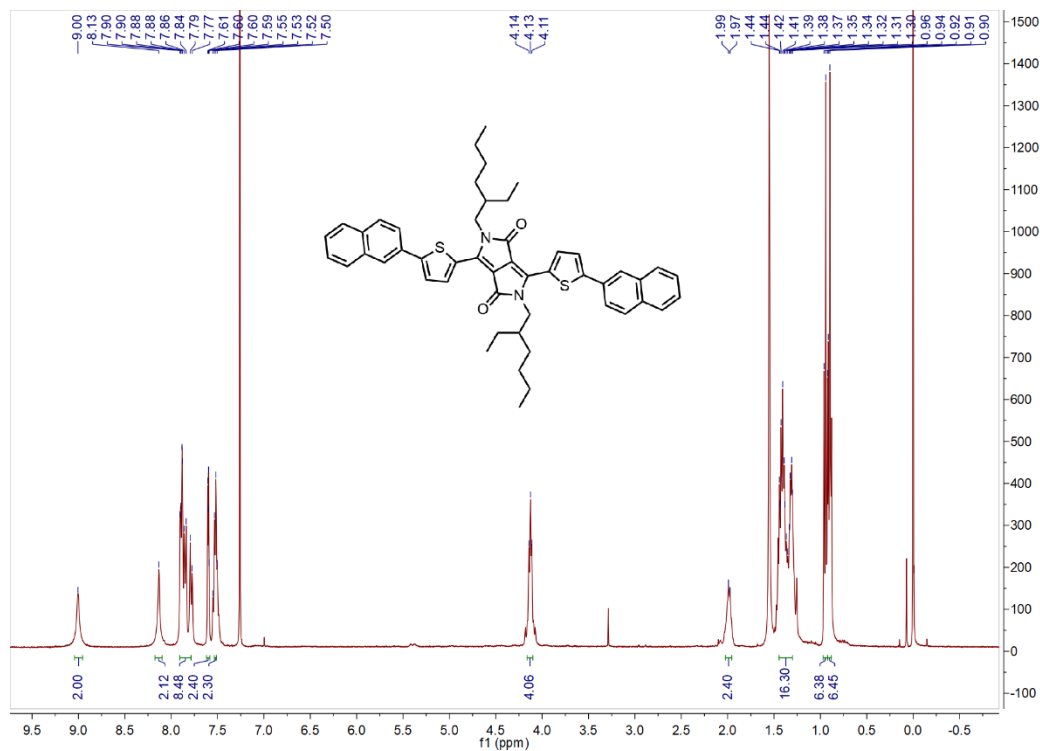

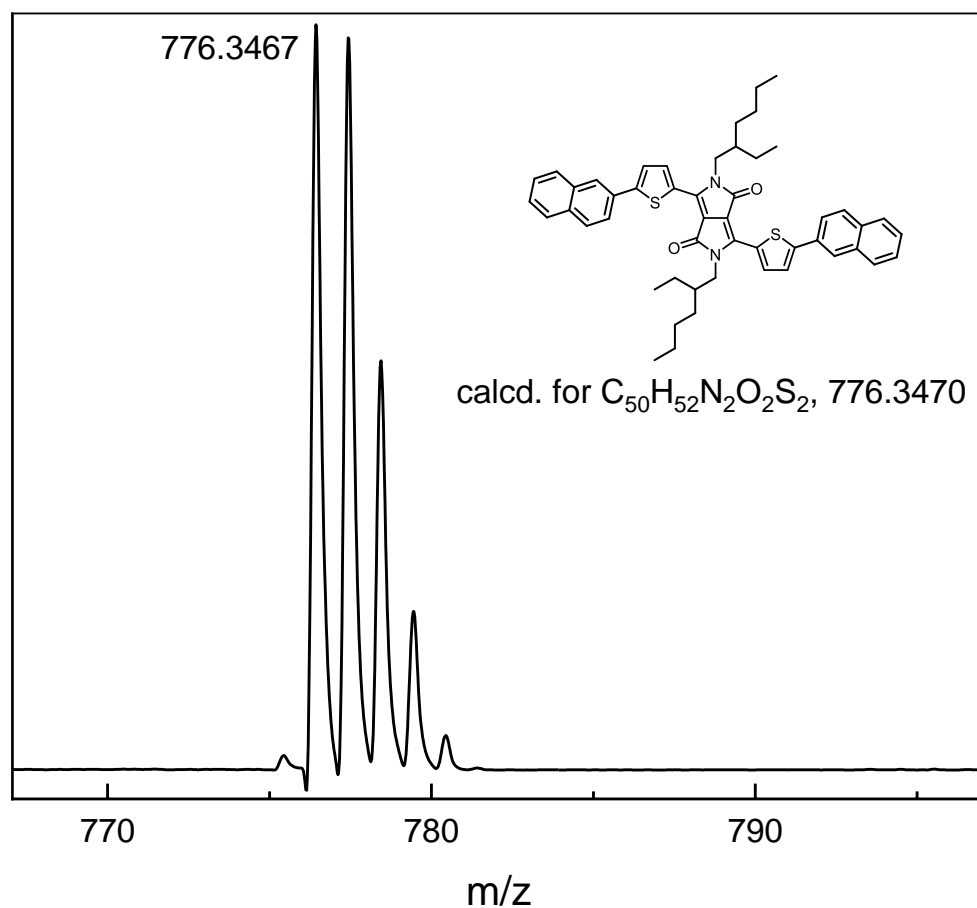

**Supplementary Figure 40.** MALDI-TOF-MS of 2N-TDPP. Calcd for  $C_{50}H_{52}N_2O_2S_2$ :  $m/z$ : 776.3470. Found: 776.3467.

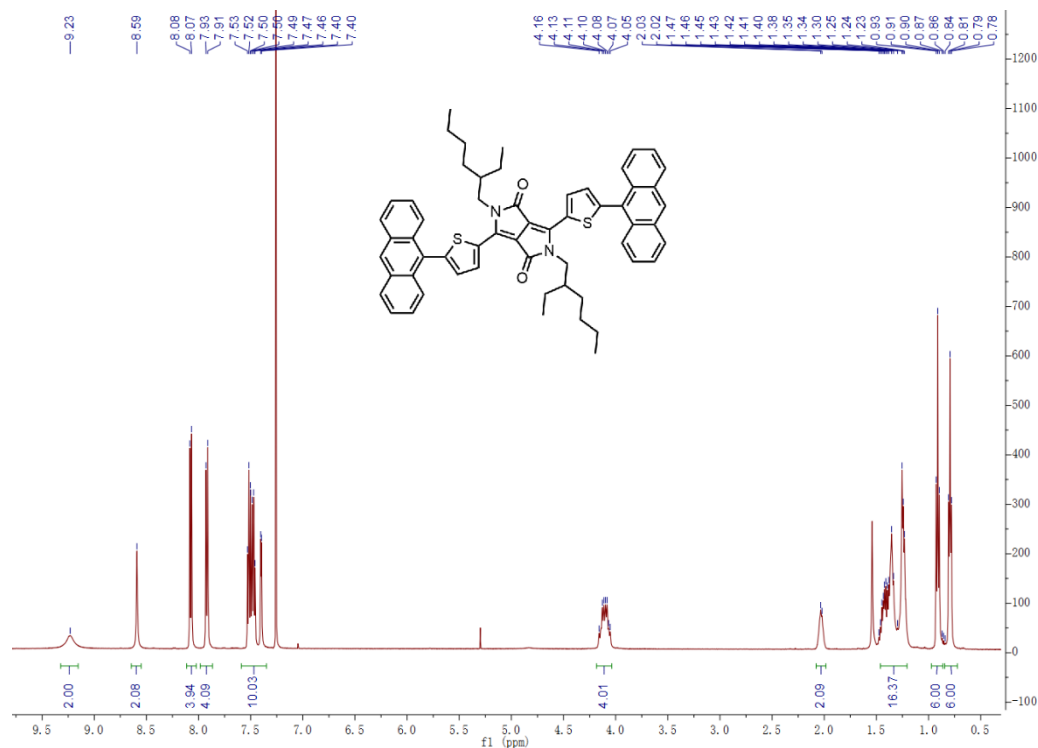

**Supplementary Figure 41.**  $^1H$  NMR of An-TDPP in Chloroform- $d$ .



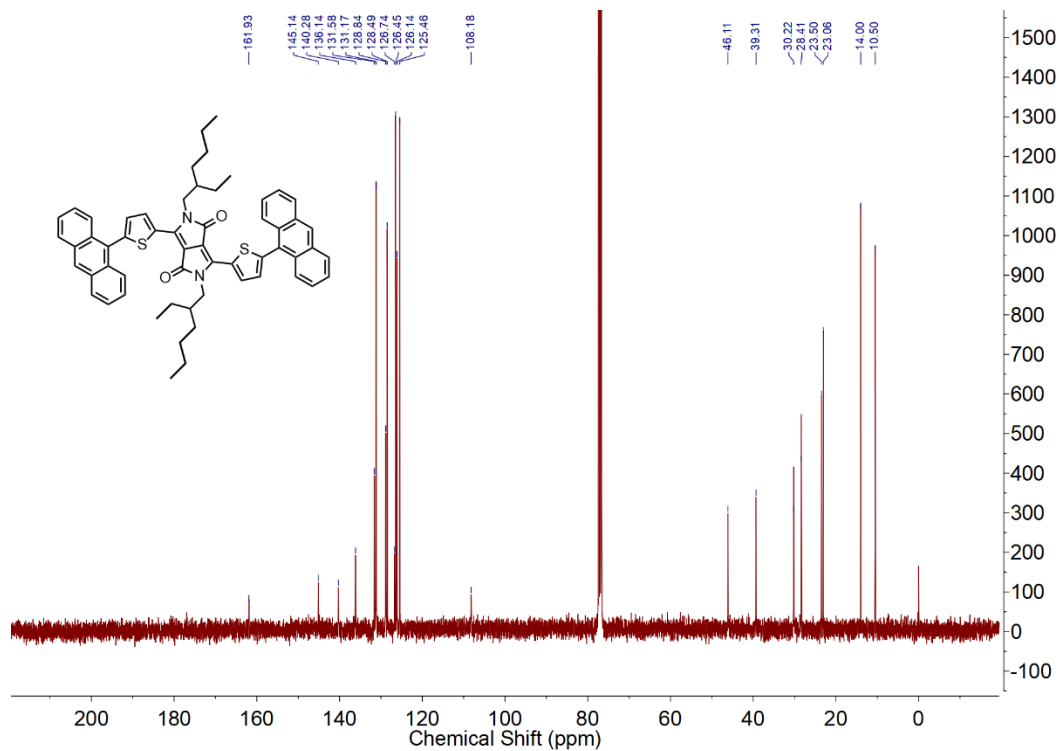

Supplementary Figure 42.  $^{13}\text{C}$  NMR of An-TDPP in Chloroform-*d*.

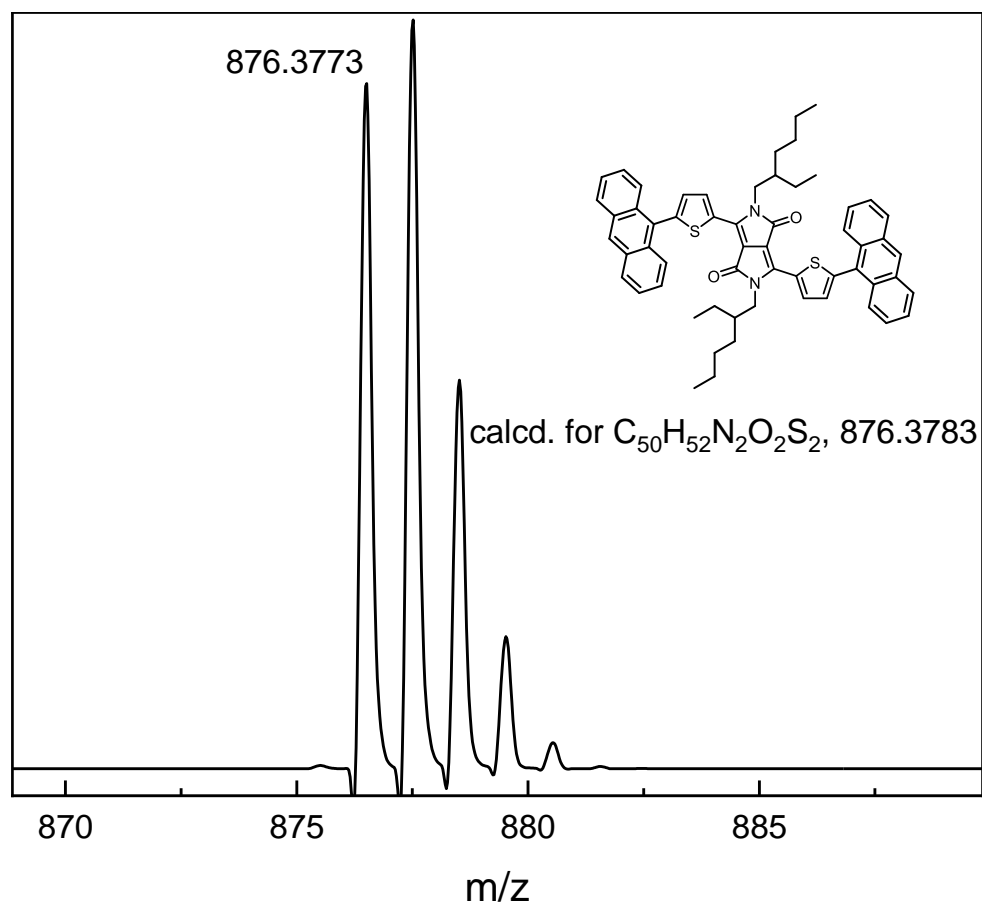

Supplementary Figure 43. MALDI-TOF-MS of An-TDPP. Calcd for  $\text{C}_{50}\text{H}_{52}\text{N}_2\text{O}_2\text{S}_2$ ;  $m/z$ : 876.3783. Found:

876.3773.

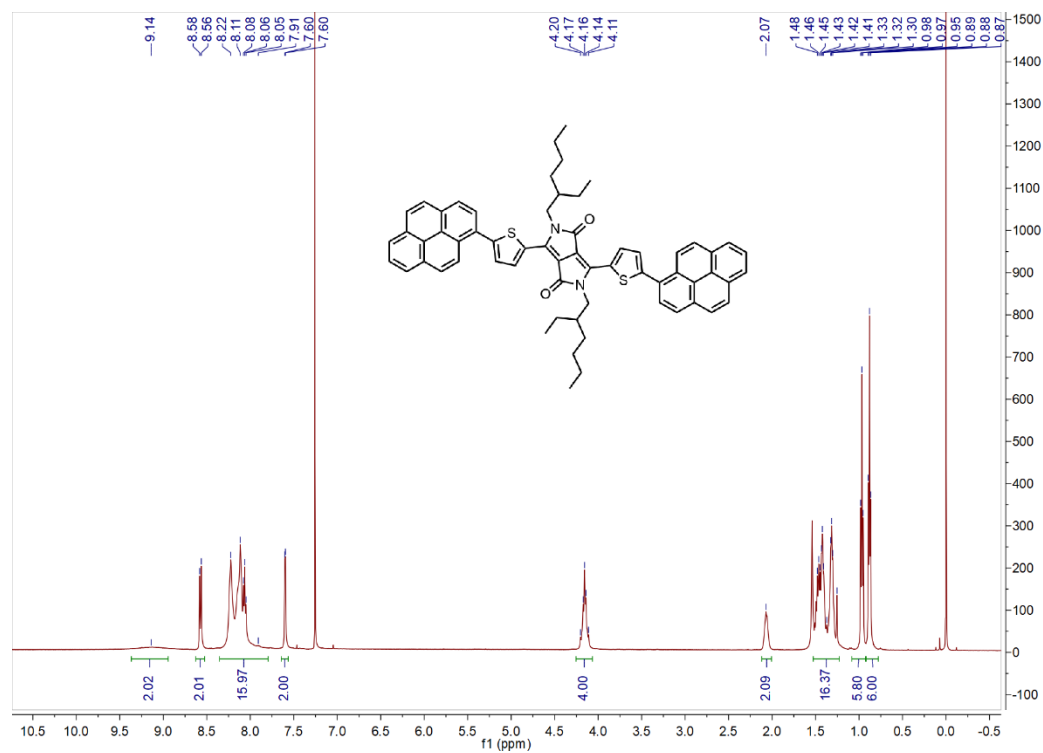**Supplementary Figure 44.**  $^1\text{H}$  NMR of Py-TDPP in Chloroform-*d*.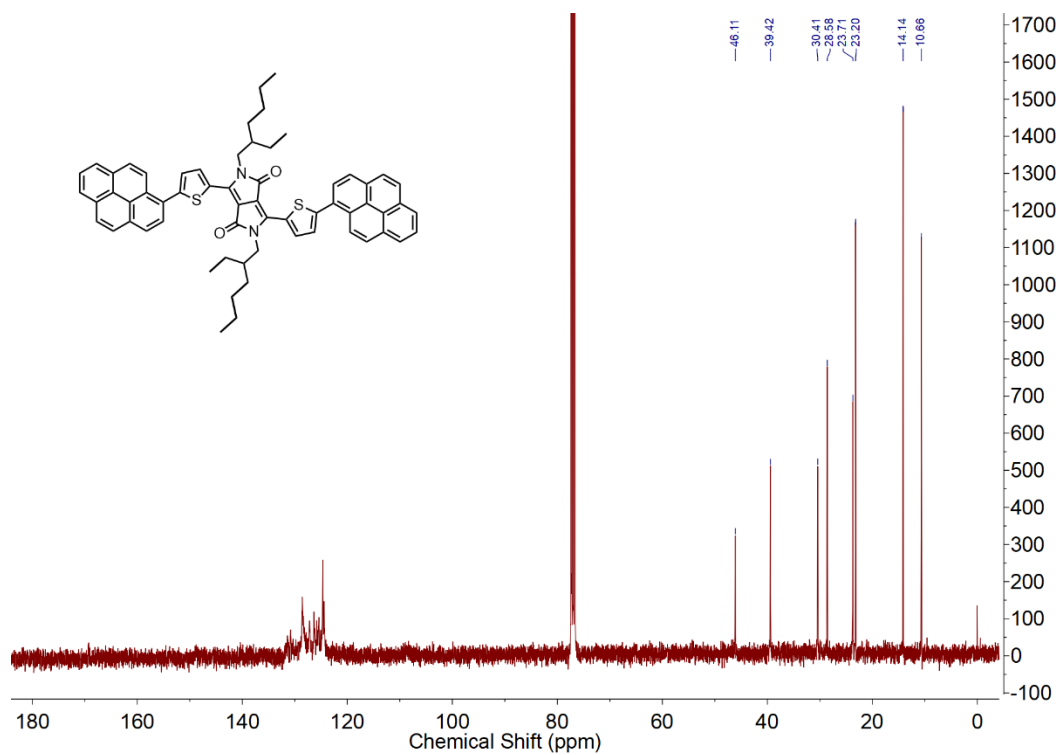**Supplementary Figure 45.**  $^{13}\text{C}$  NMR of Py-TDPP in Chloroform-*d* (saturated solution).

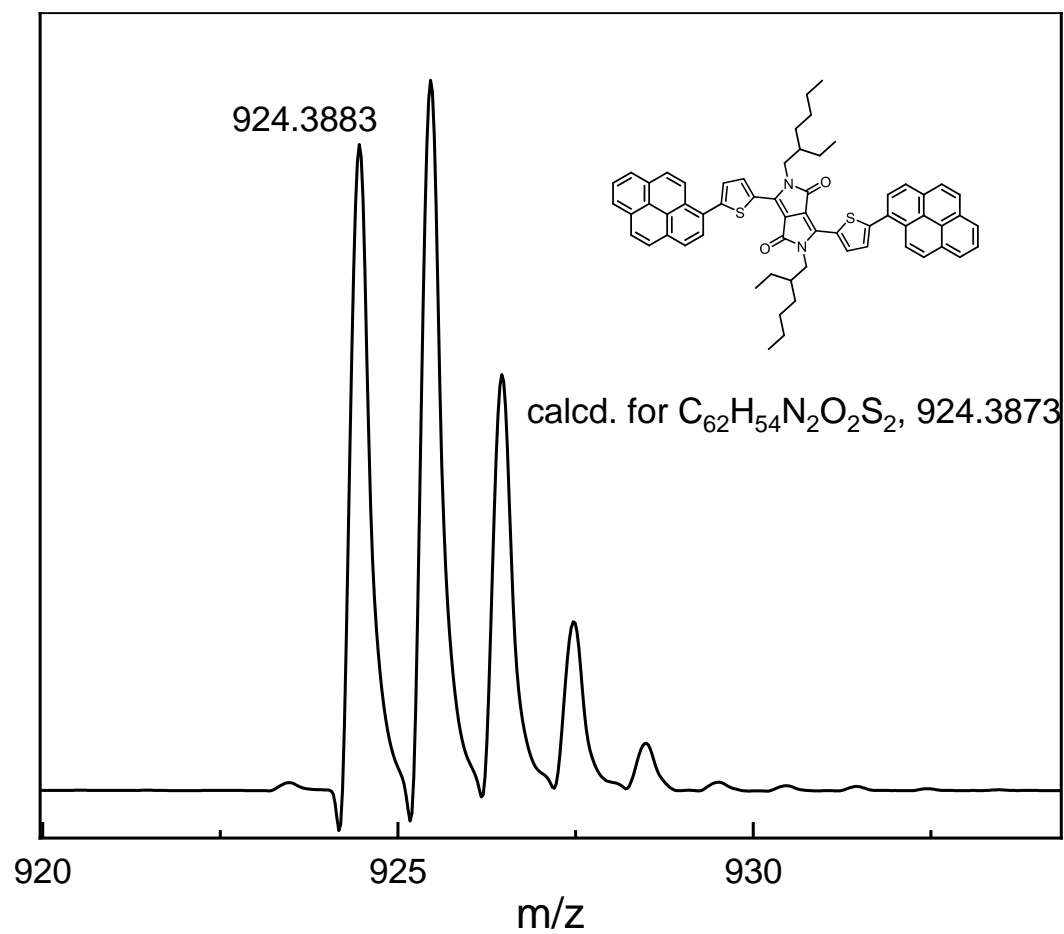

**Supplementary Figure 46.** MALDI-TOF-MS of Py-TDPP. Calcd. for  $C_{62}H_{56}N_2O_2S_2$ ;  $m/z$ : 924.3873. Found: 924.3883.

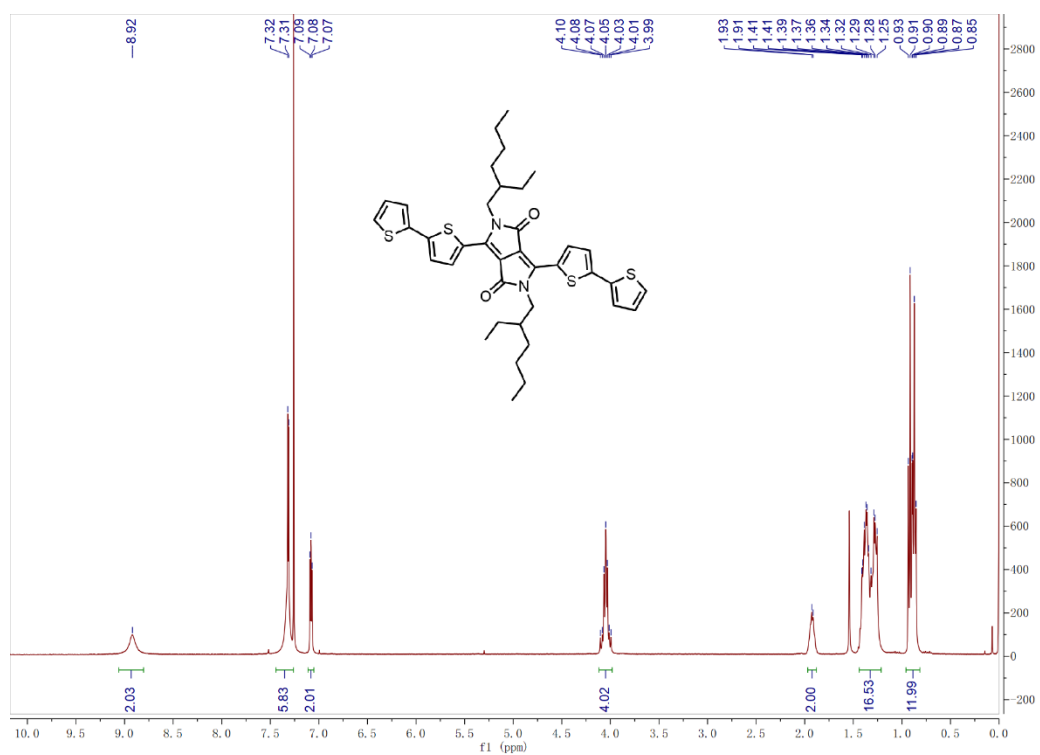

Supplementary Figure 47.  $^1\text{H}$  NMR of Th-TDPP in Chloroform-*d*.

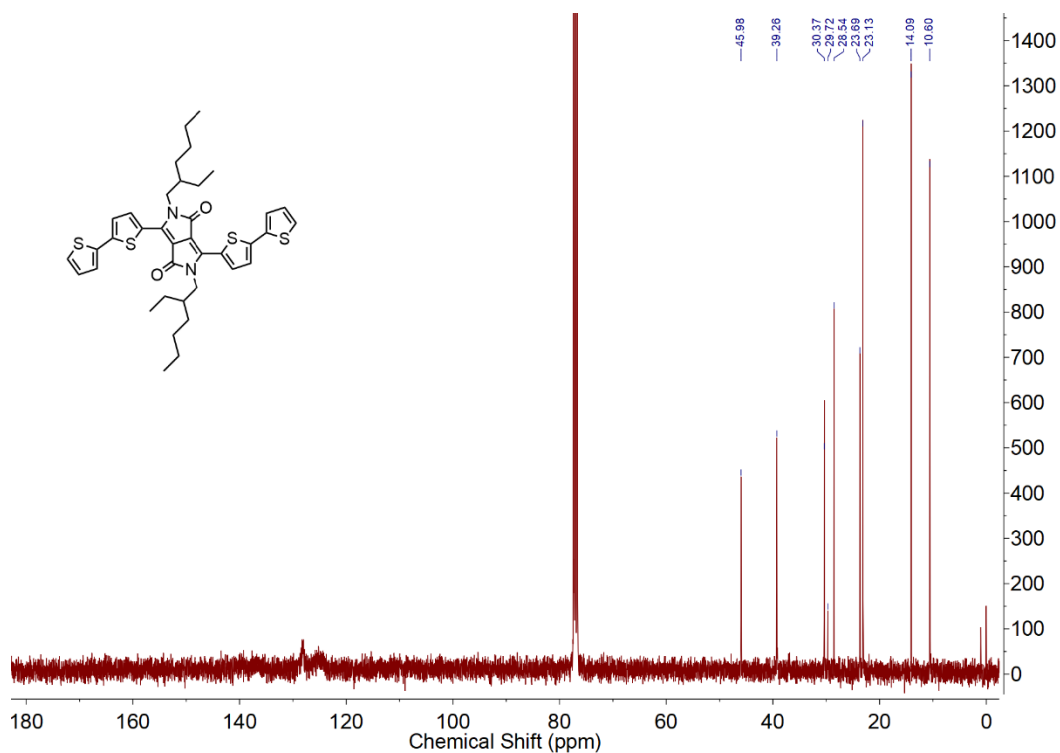

Supplementary Figure 48.  $^{13}\text{C}$  NMR of Th-TDPP in Chloroform-*d* (saturated solution).

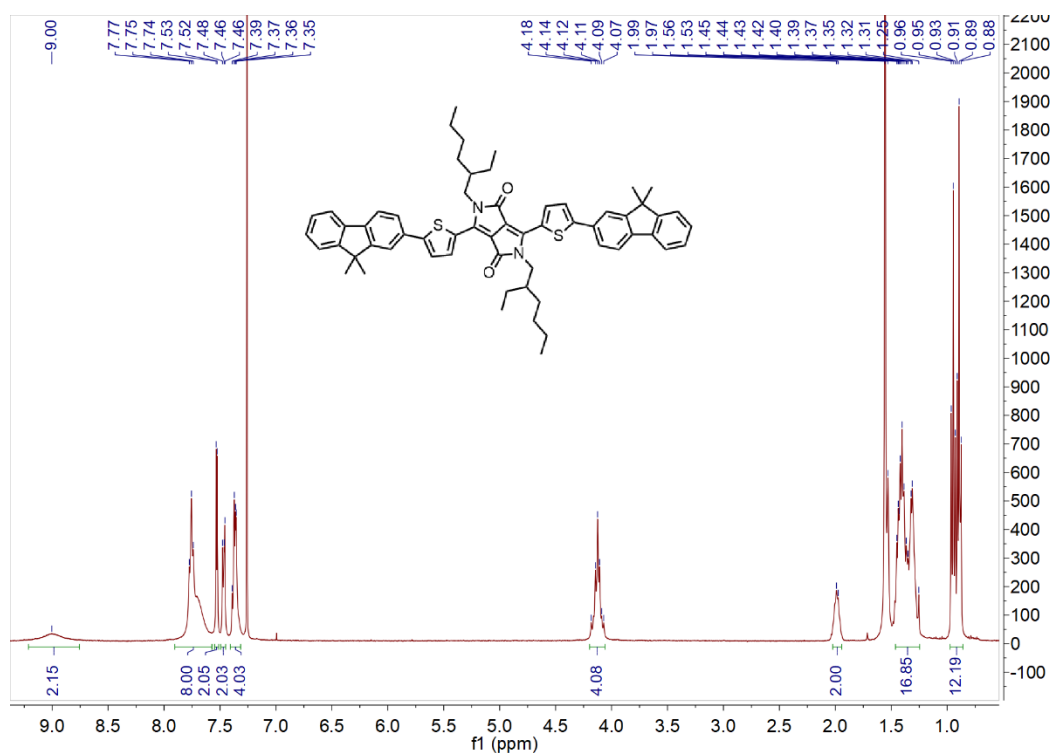

Supplementary Figure 49.  $^1\text{H}$  NMR of Flu-TDPP in Chloroform-*d*.

Supplementary Information

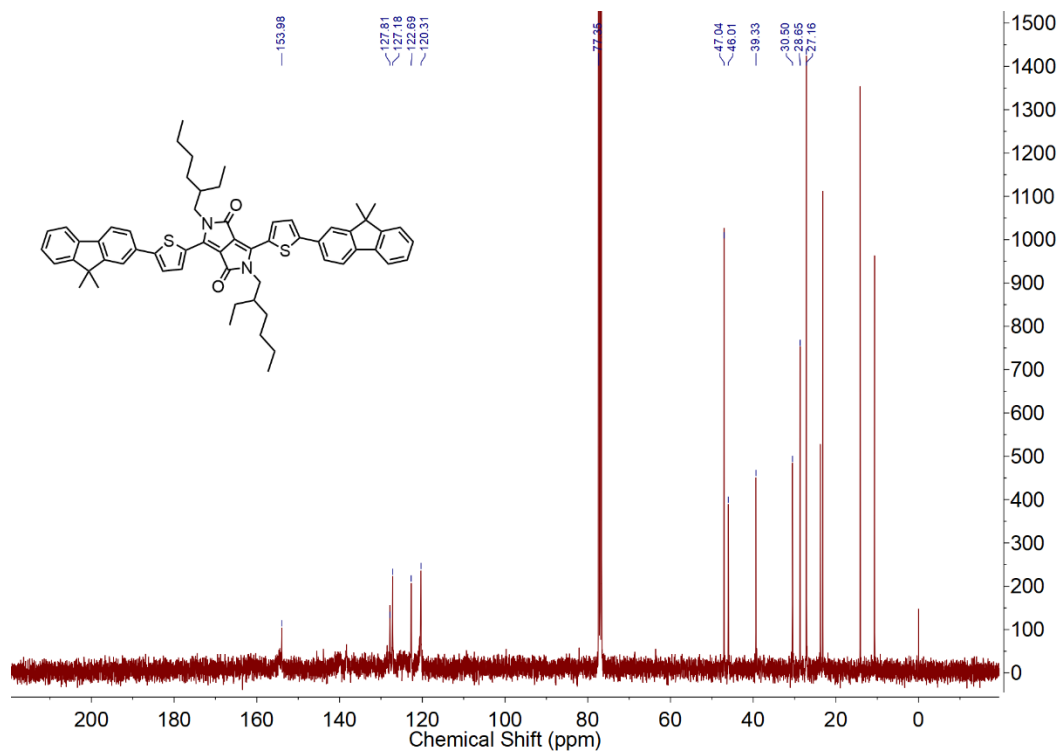

Supplementary Figure 50.  $^{13}\text{C}$  NMR of Flu-TDPP in Chloroform-*d* (saturated solution).

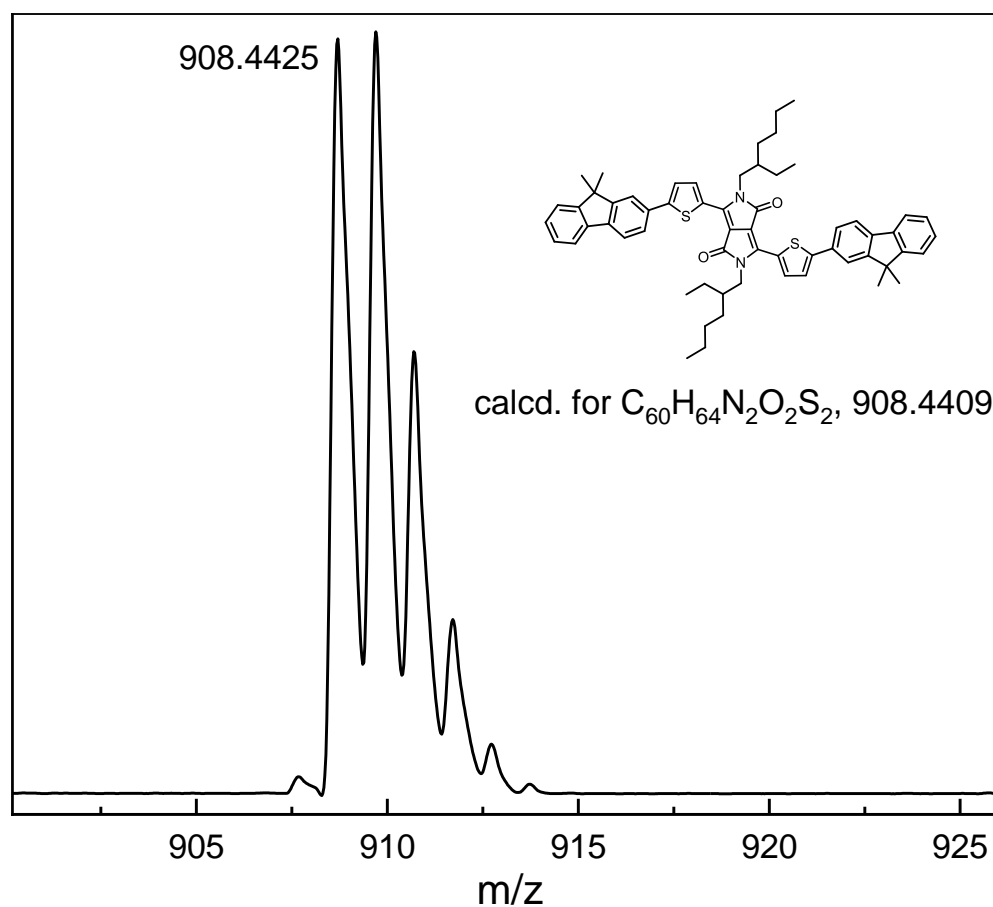

Supplementary Figure 51. MALDI-TOF-MS of Flu-TDPP. Calcd for  $\text{C}_{60}\text{H}_{64}\text{N}_2\text{O}_2\text{S}_2$ ;  $m/z$ : 908.4409. Found: 908.4425.

Supplementary Information

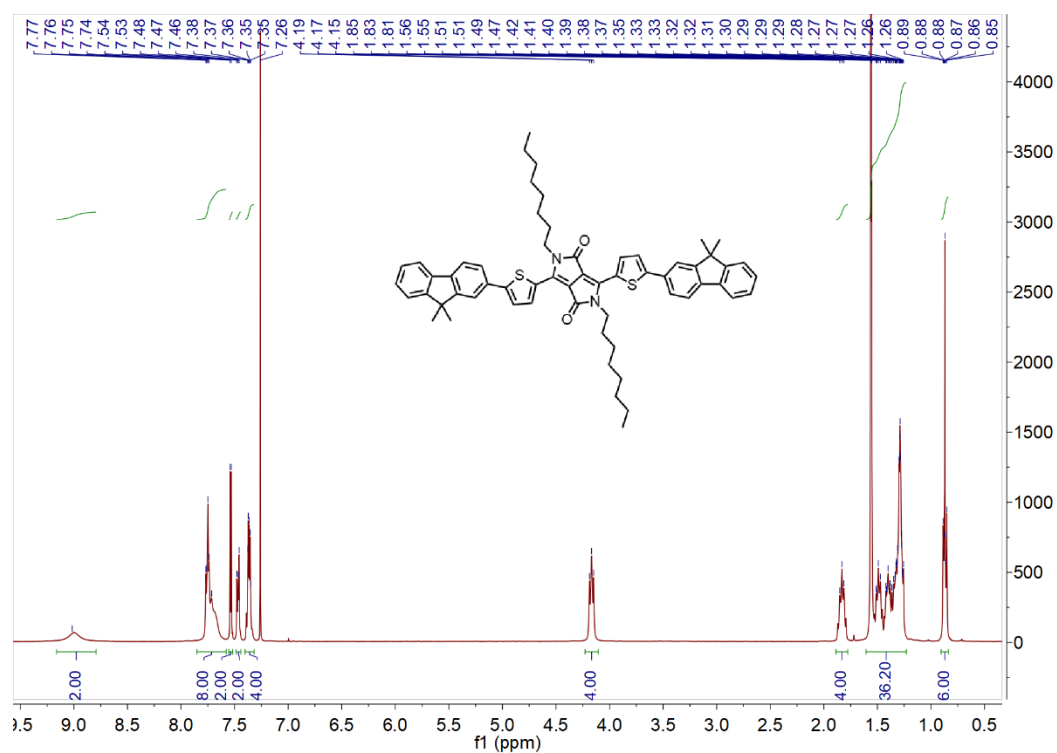

**Supplementary Figure 52.**  $^1\text{H}$  NMR of Flu-TDPP-C8 in Chloroform-*d*.

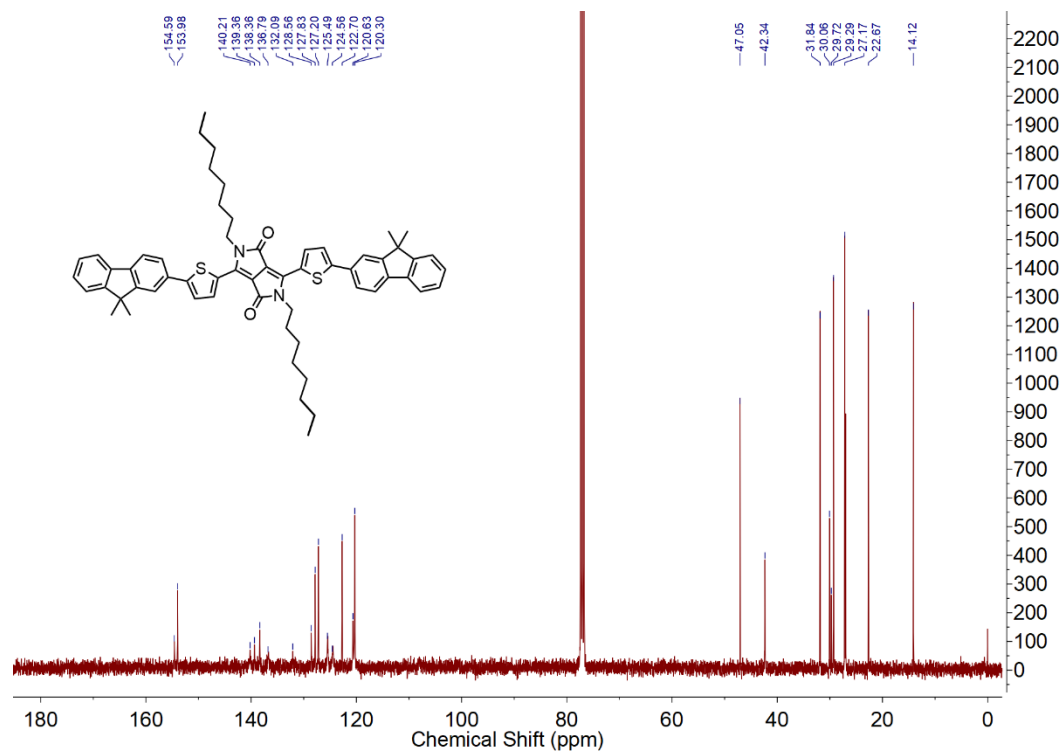

**Supplementary Figure 53.**  $^{13}\text{C}$  NMR of Flu-TDPP-C8 in Chloroform-*d* (saturated solution).

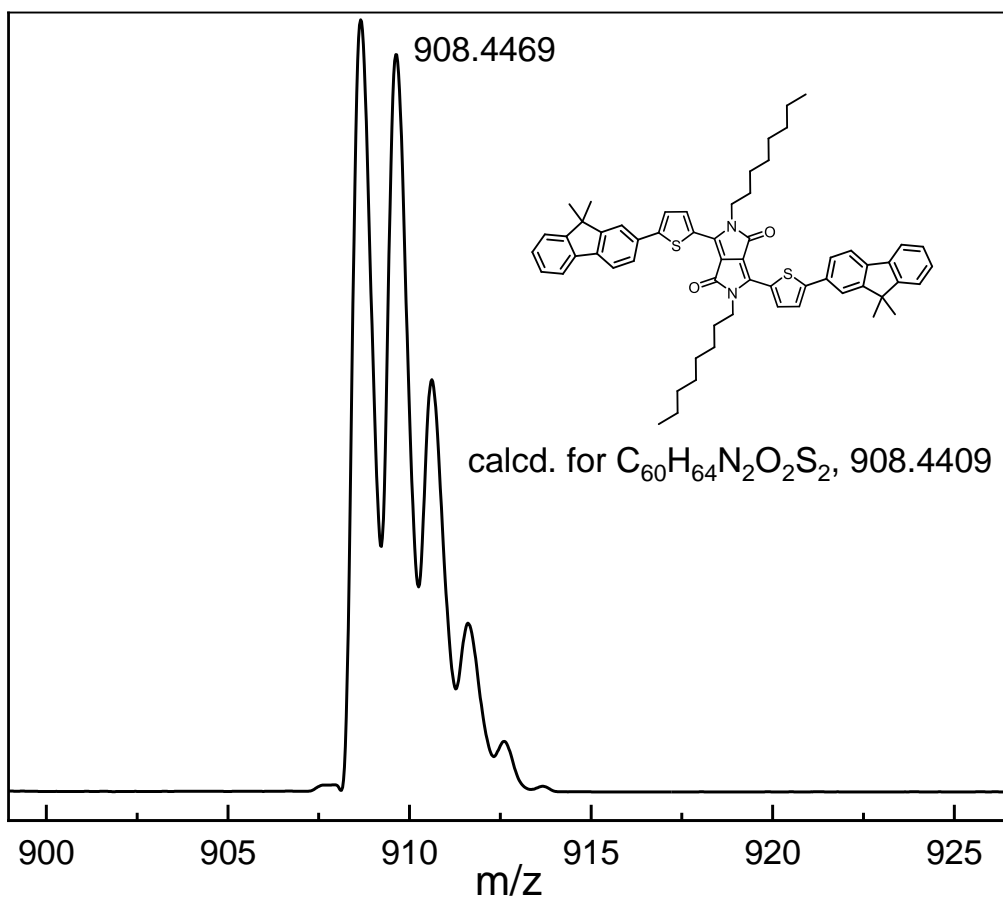

**Supplementary Figure 54.** MALDI-TOF-MS of Flu-TDPP-C8. Calcd for  $C_{60}H_{64}N_2O_2S_2$ :  $m/z$ : 908.4409. Found: 908.4469.

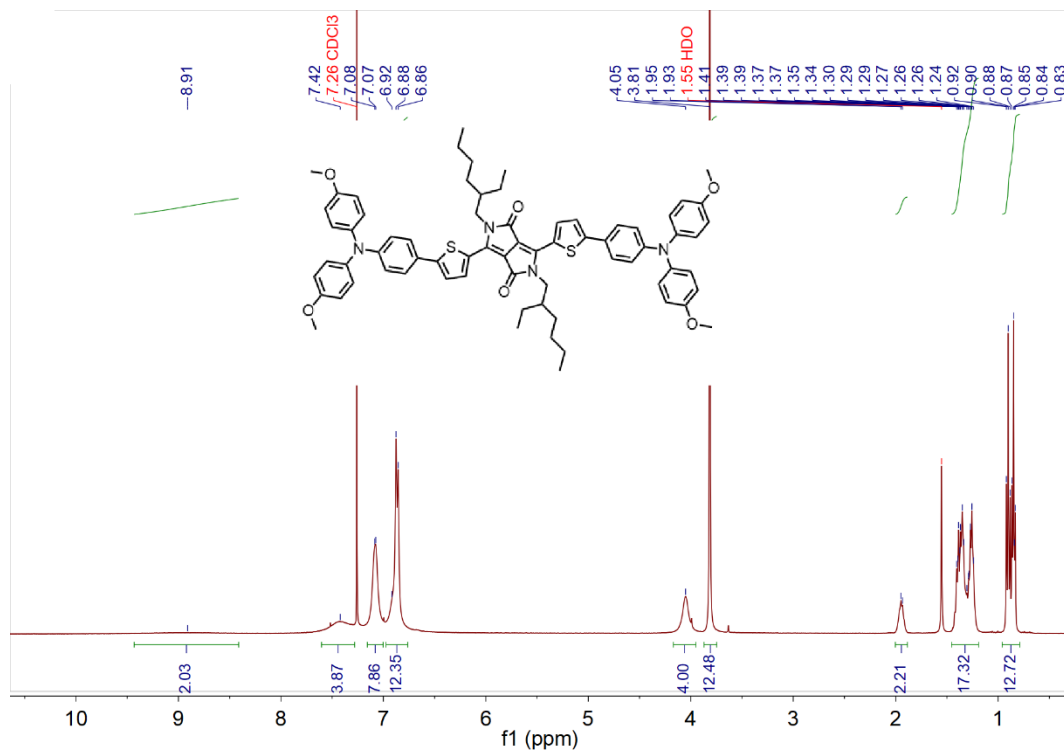

**Supplementary Figure 55.**  $^1H$  NMR of TPAOMe-TDPP in Chloroform- $d$ .

Supplementary Information

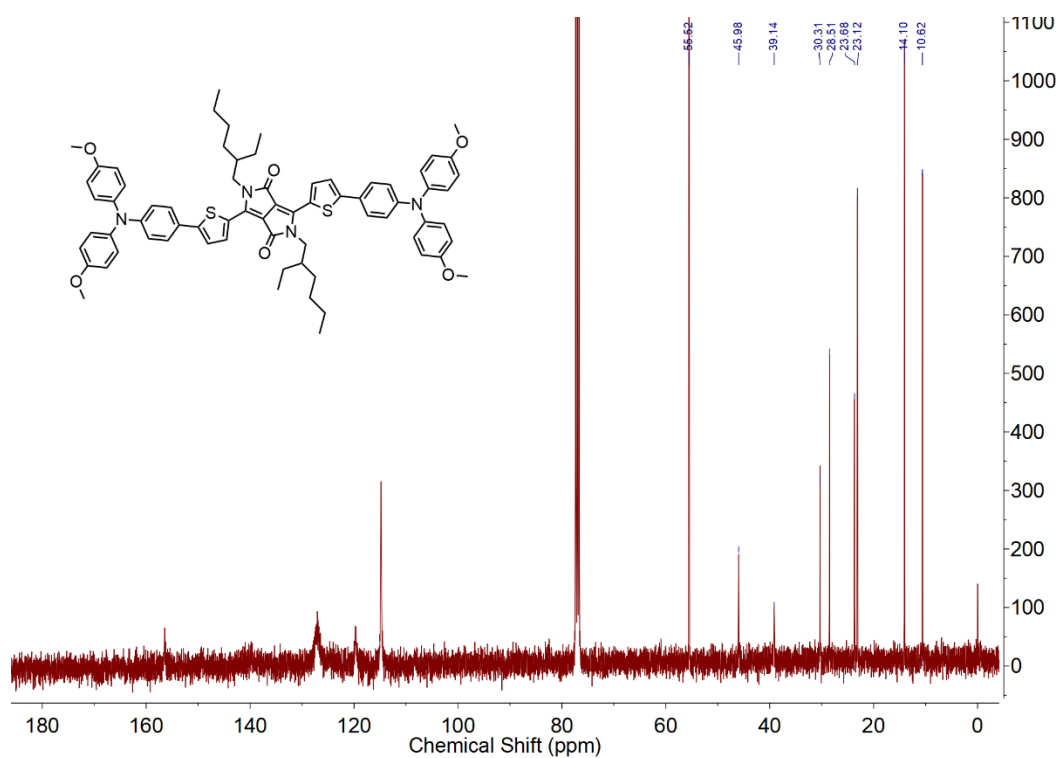

Supplementary Figure 56.  $^{13}\text{C}$  NMR of TPAOMe-TDPP in Chloroform-*d* (saturated solution).

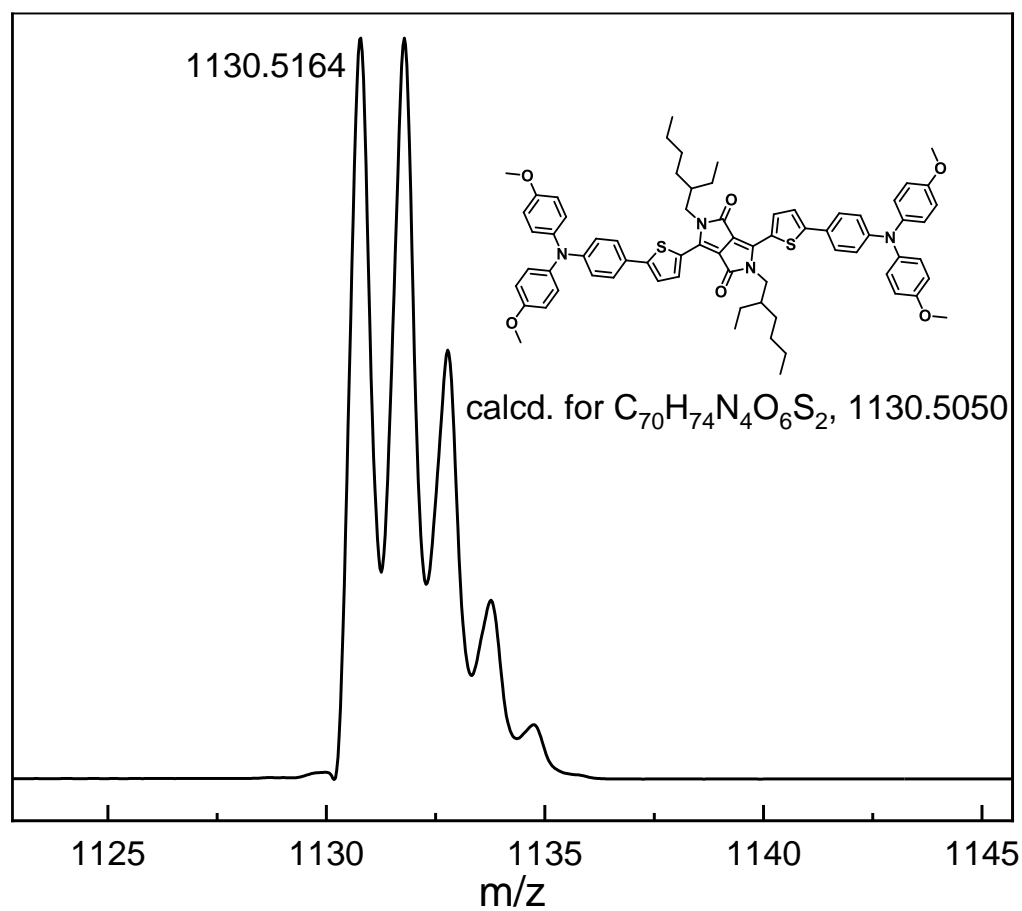

Supplementary Figure 57. MALDI-TOF-MS of TPAOMe-TDPP. Calcd for  $\text{C}_{70}\text{H}_{74}\text{N}_4\text{O}_6\text{S}_2$ ;  $m/z$ : 1130.5050. Found:



1130.5164.

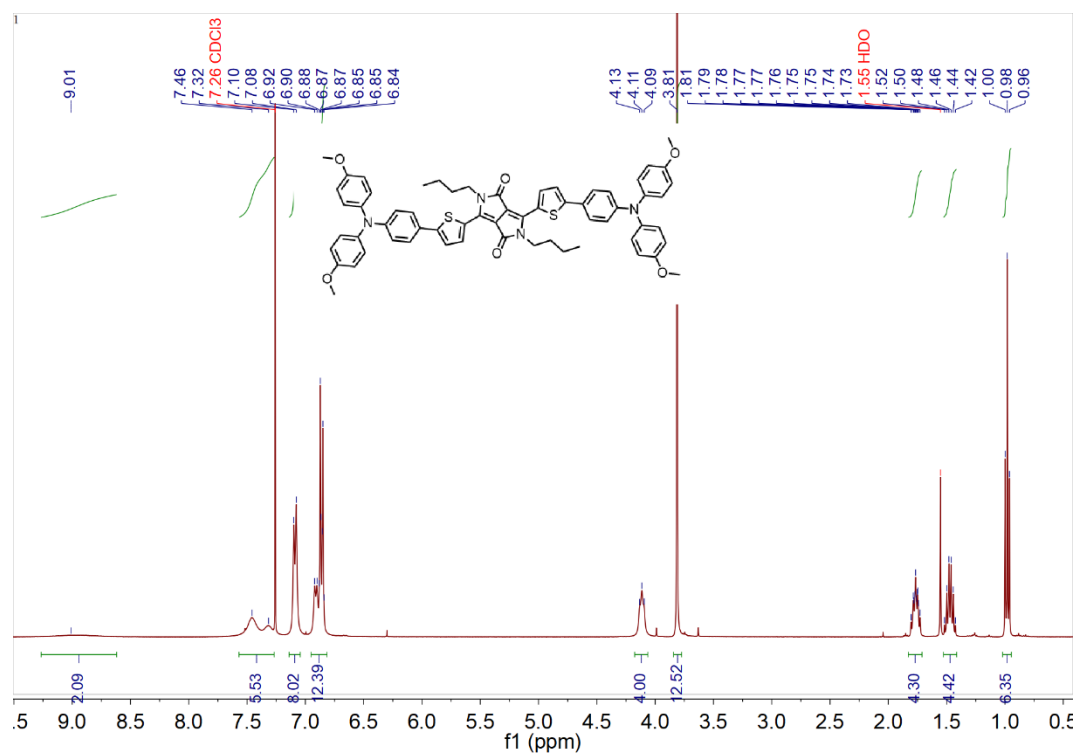**Supplementary Figure 58.** <sup>1</sup>H NMR of TPAOMe-TDPP-C4 in Chloroform-*d*.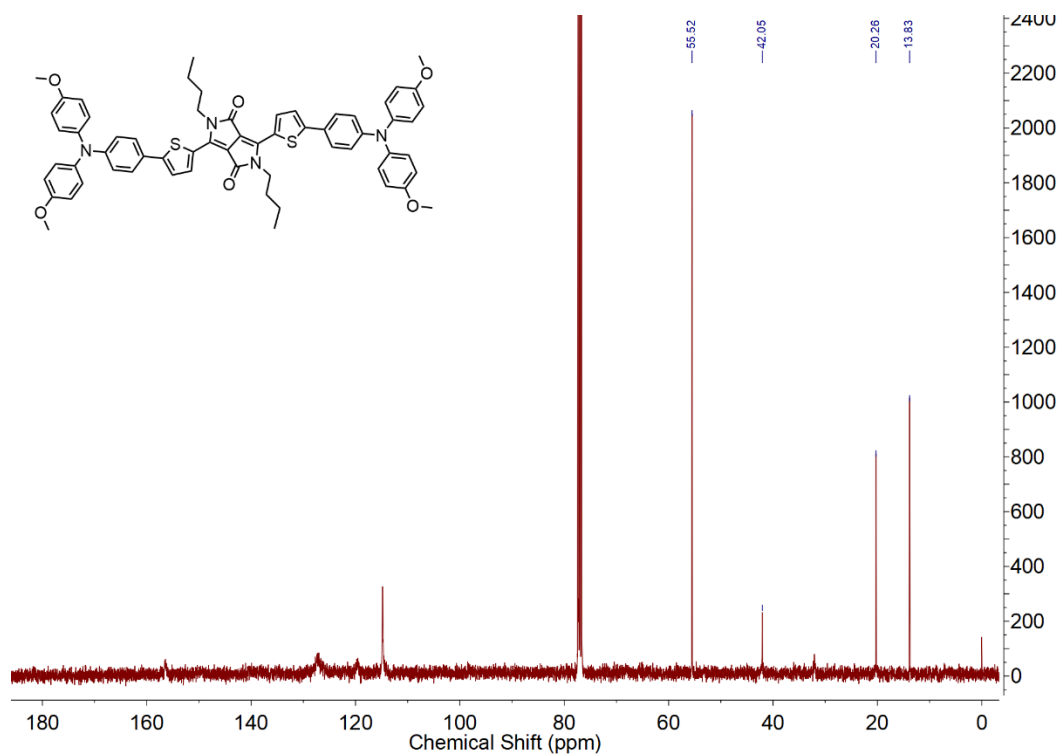**Supplementary Figure 59.** <sup>13</sup>C NMR of TPAOMe-TDPP-C4 in Chloroform-*d* (saturated solution).

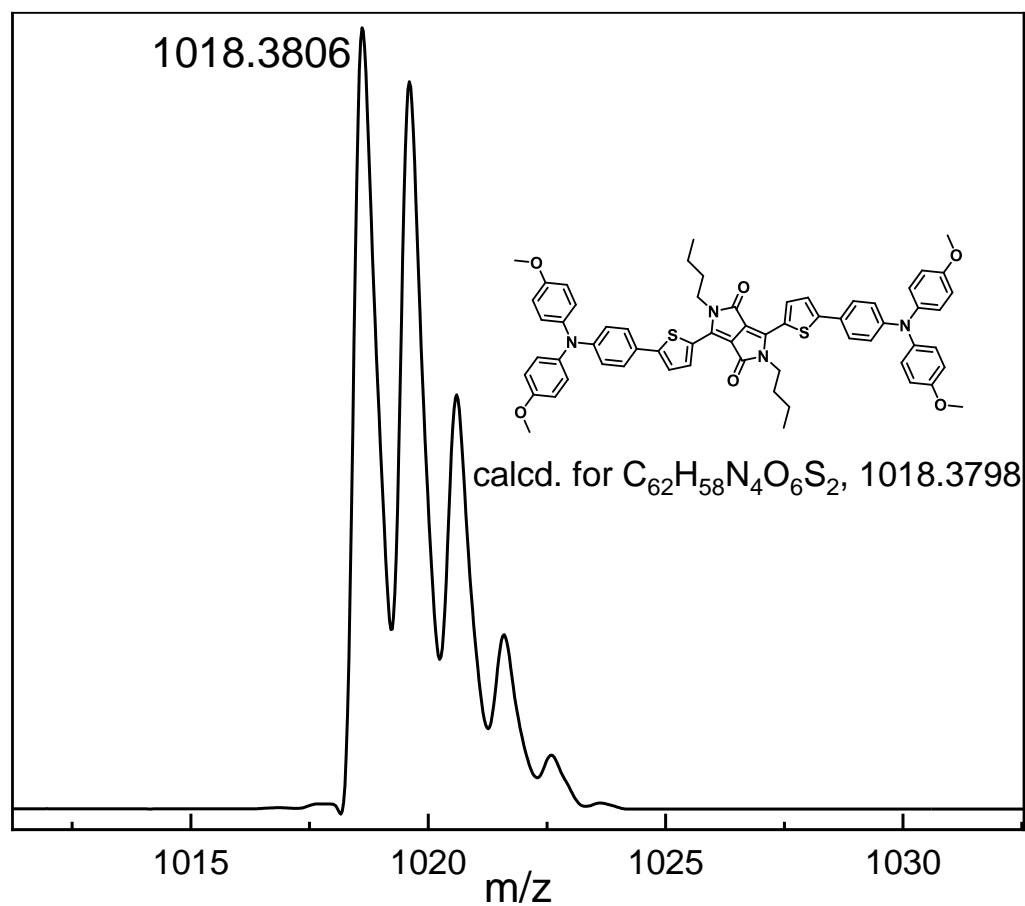

**Supplementary Figure 60.** MALDI-TOF-MS of TPAOMe-TDPP-C4. Calcd for  $C_{62}H_{58}N_4O_6S_2$ :  $m/z$ : 1018.3798. Found: 1018.3806.

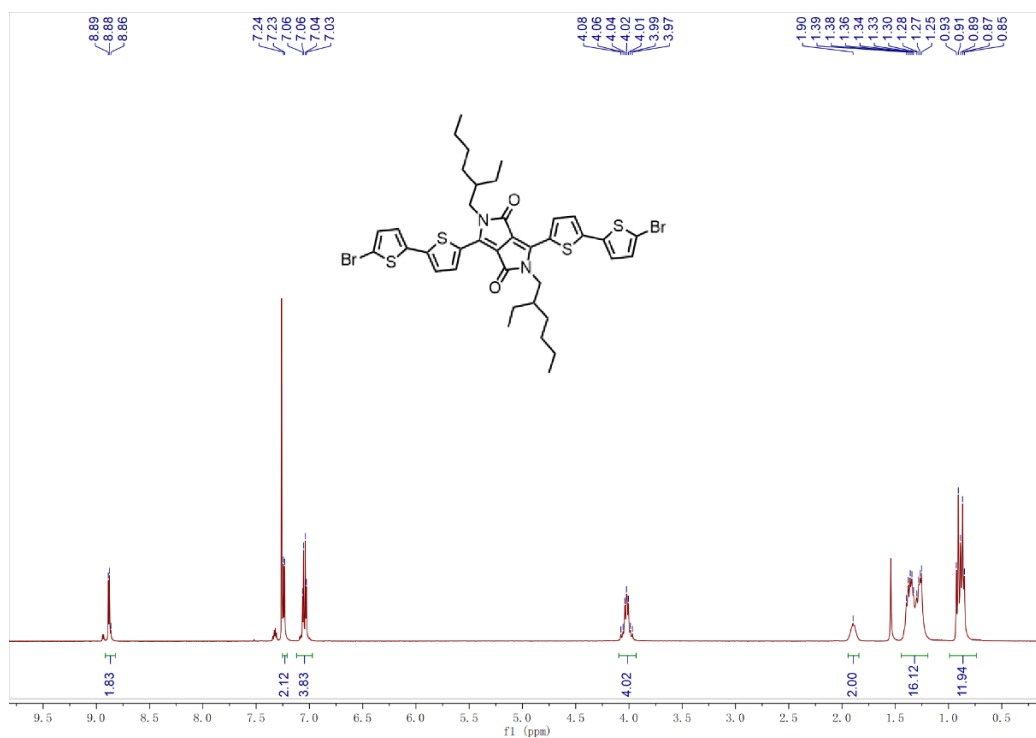

**Supplementary Figure 61.** The  $^1H$  NMR spectrum of  $Br_2$ -TDPP in Chloroform- $d$ .

Supplementary Information

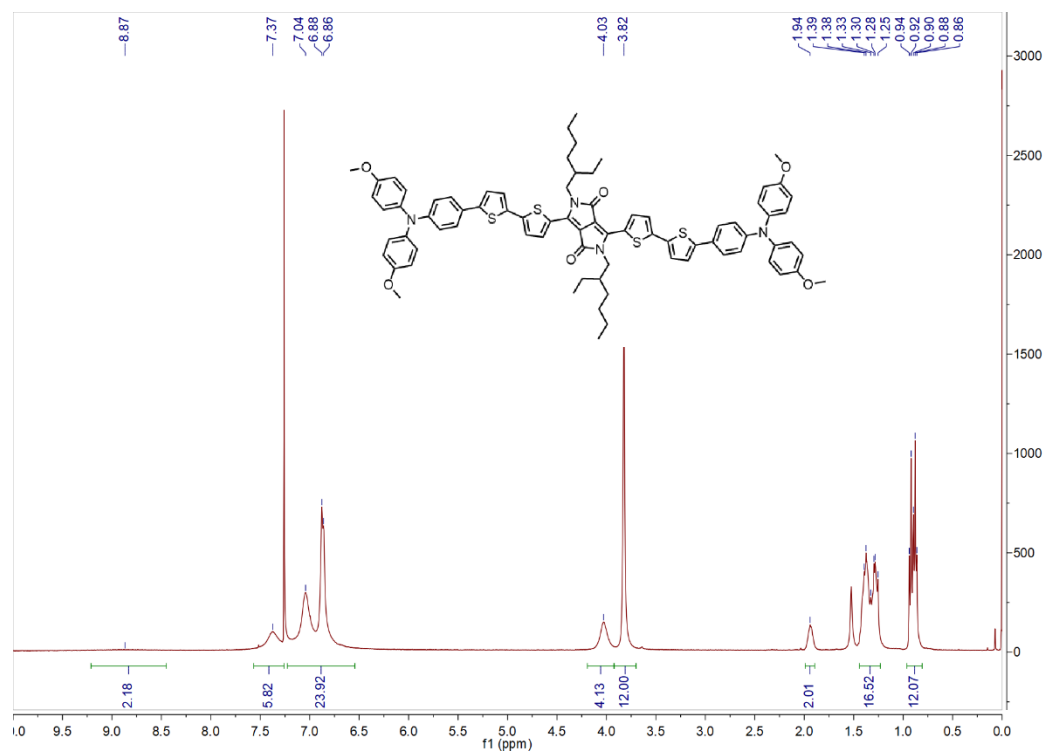

Supplementary Figure 62.  $^1\text{H}$  NMR of TPAOMe-TDPP in Chloroform-*d*.

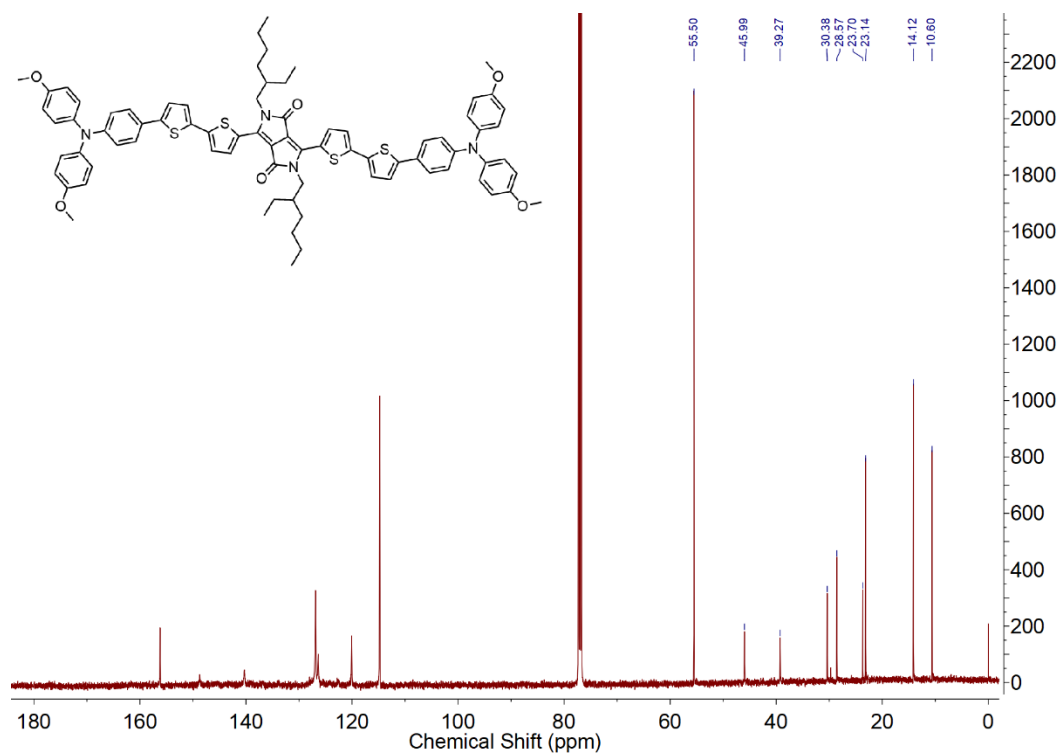

Supplementary Figure 63.  $^{13}\text{C}$  NMR of TPAOMe-TDPP in Chloroform-*d*.

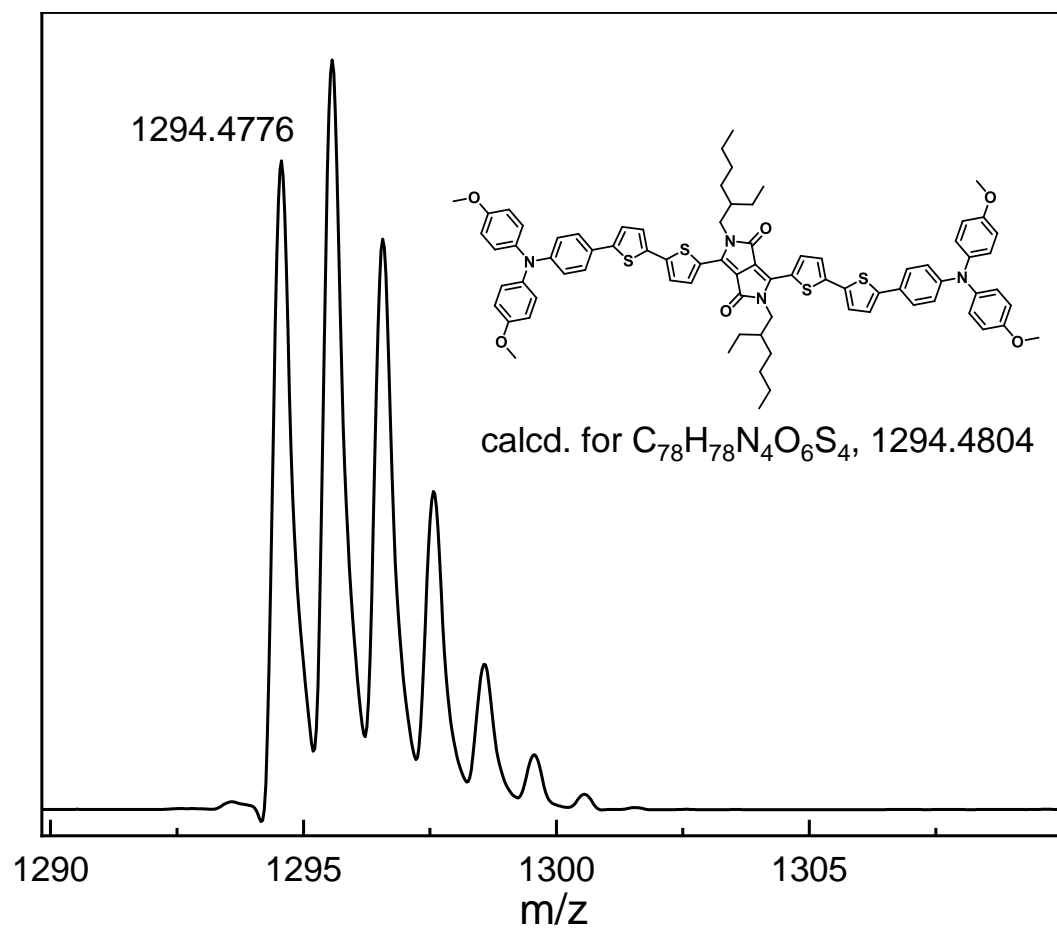

**Supplementary Figure 64.** MALDI-TOF-MS of TPAOMe-TDPP. Calcd for  $C_{78}H_{78}N_4O_6S_4$ :  $m/z$ : 1294.4804. Found: 1294.4776.

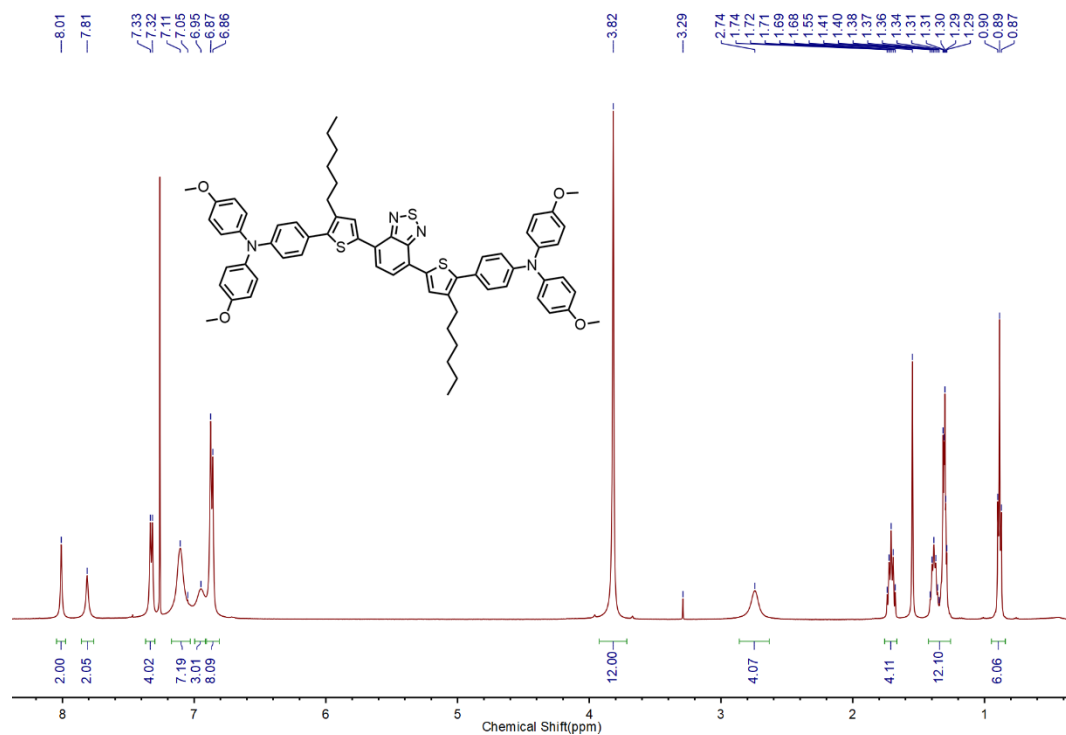

Supplementary Information

Supplementary Figure 65. <sup>1</sup>H NMR of TPAOMe-BTT in Chloroform-*d*.

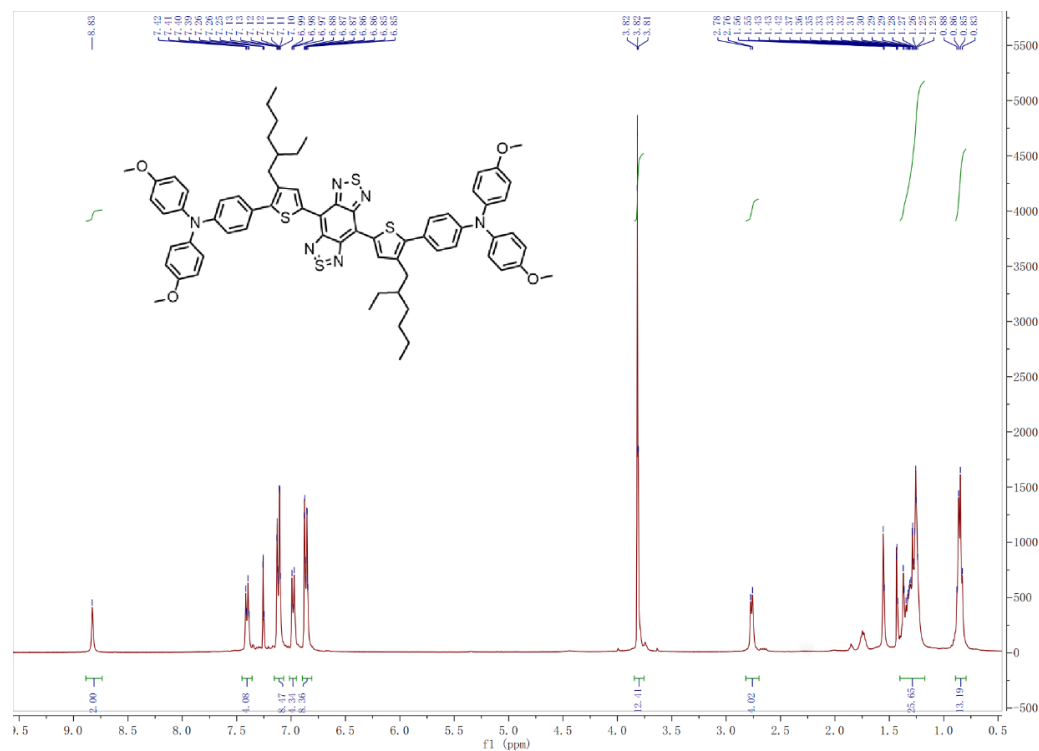

Supplementary Figure 66. <sup>1</sup>H NMR of TPAOMe-BBTT in Chloroform-*d*.

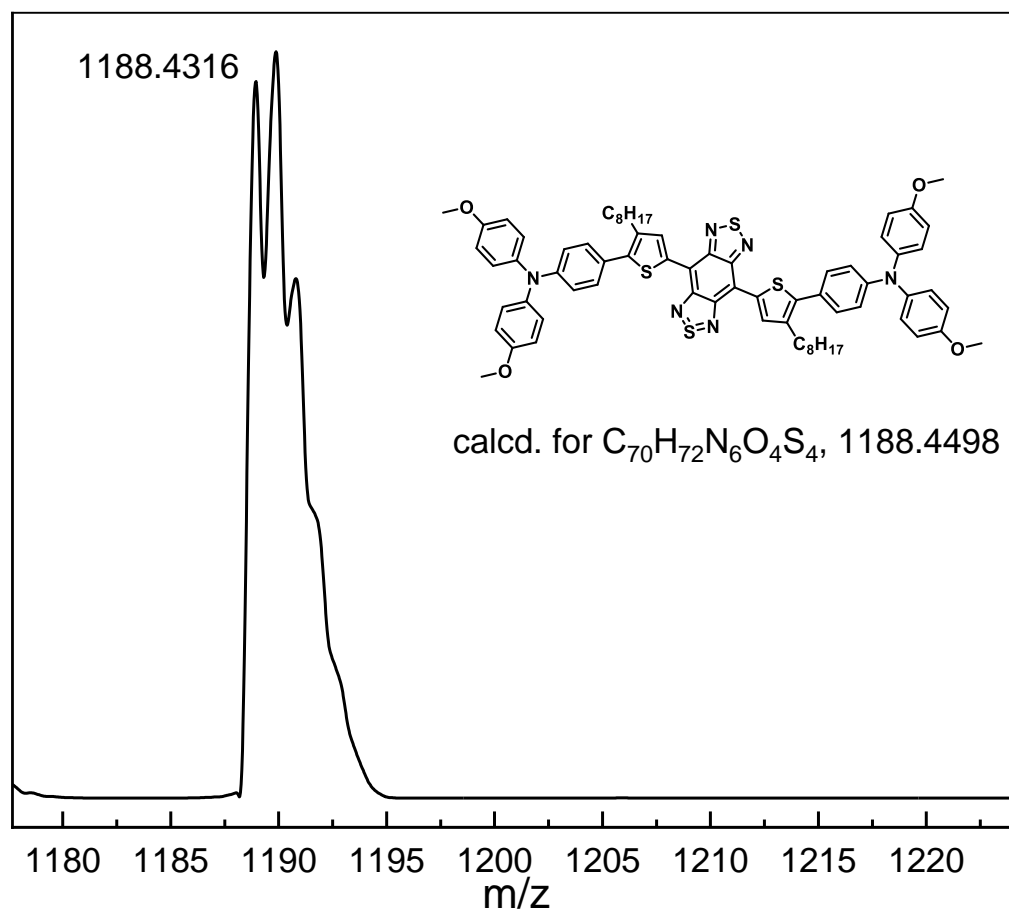

## Supplementary Information

**Supplementary Figure 67.** MALDI-TOF-MS of TPAOMe-BBTT. Calcd for  $C_{78}H_{78}N_4O_6S_4$ :  $m/z$ : 1188.4498. Found: 1188.4316.

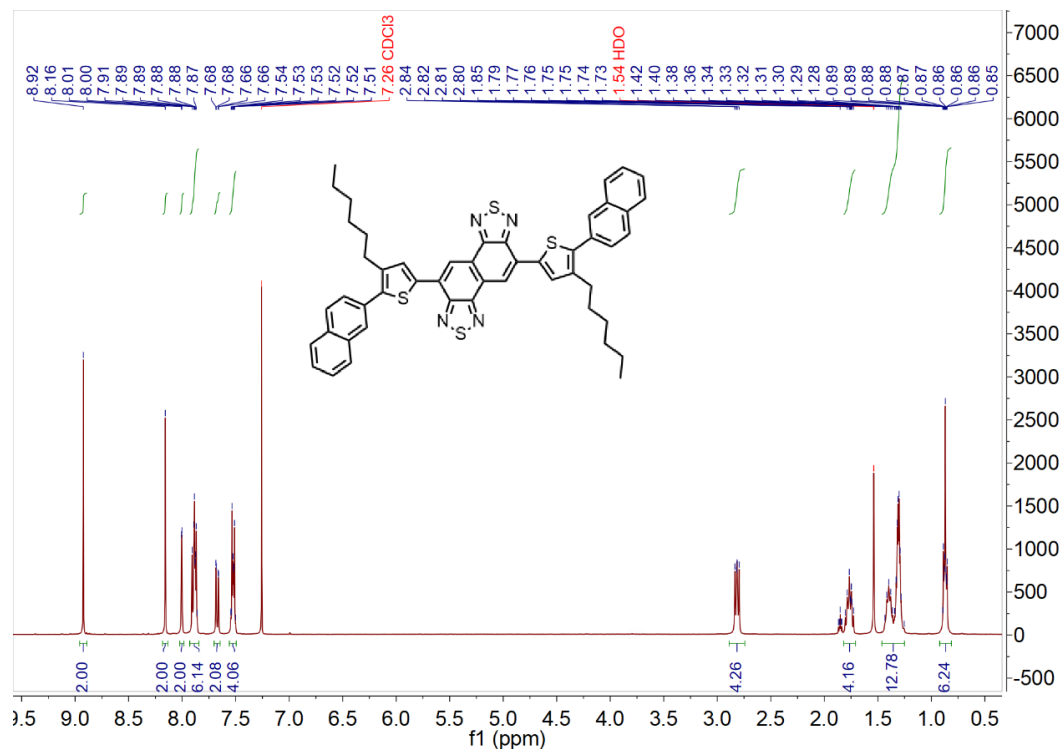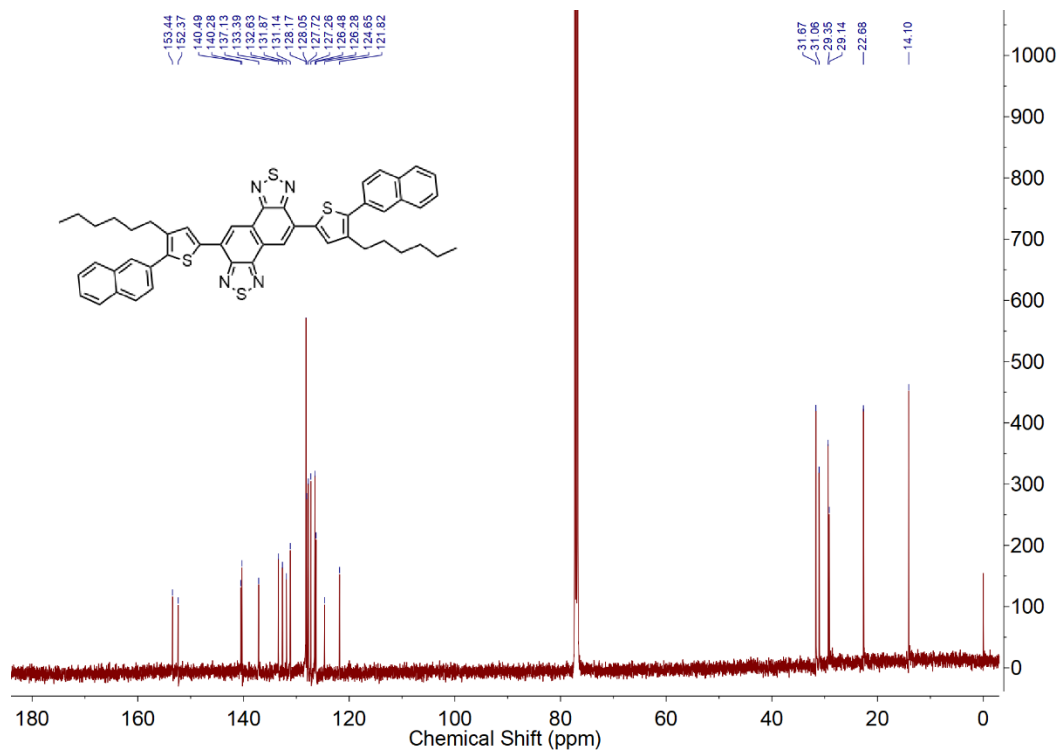

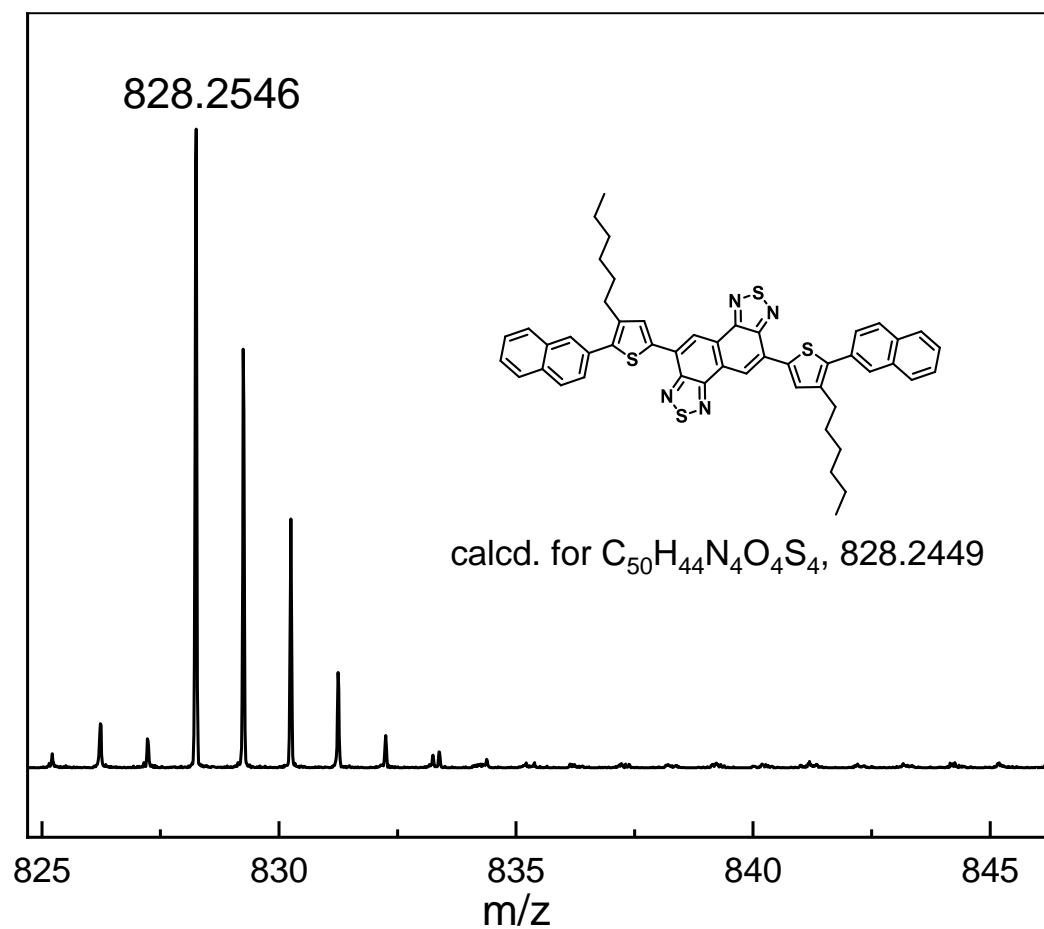

Supplementary Figure 70. MALDI-TOF-MS of 2N-NTT. Calcd for  $C_{50}H_{44}N_4S_4$ ;  $m/z$ : 828.2449. Found: 828.2546.

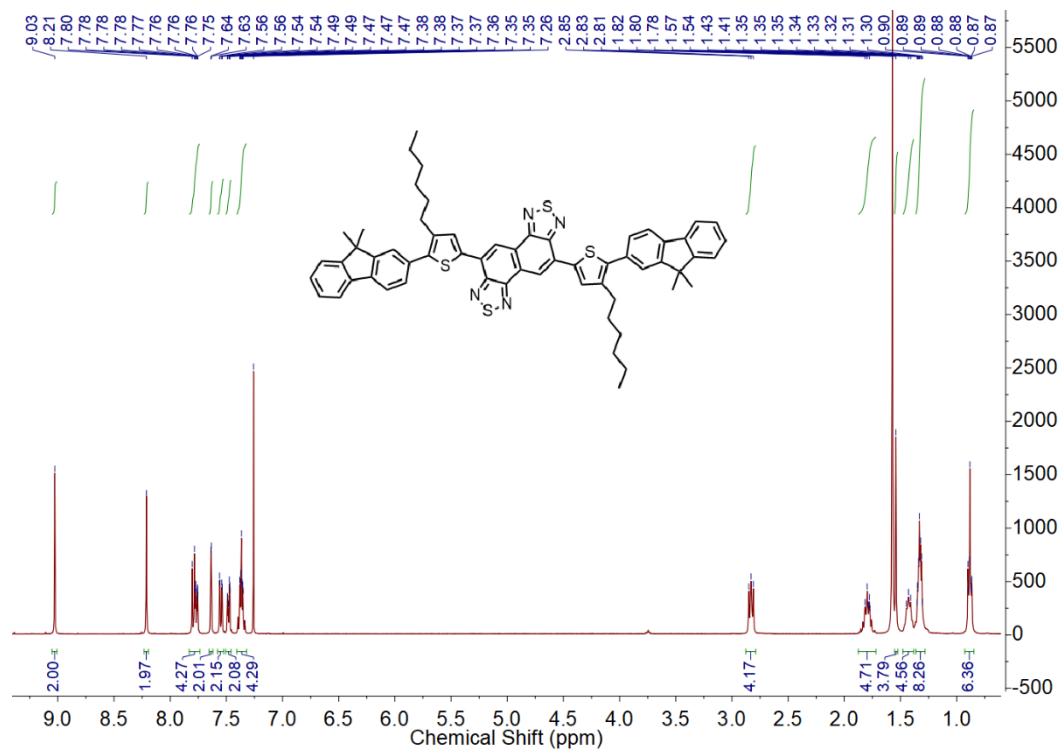

Supplementary Figure 71.  $^1H$  NMR of Flu-NTT in Chloroform- $d$ .

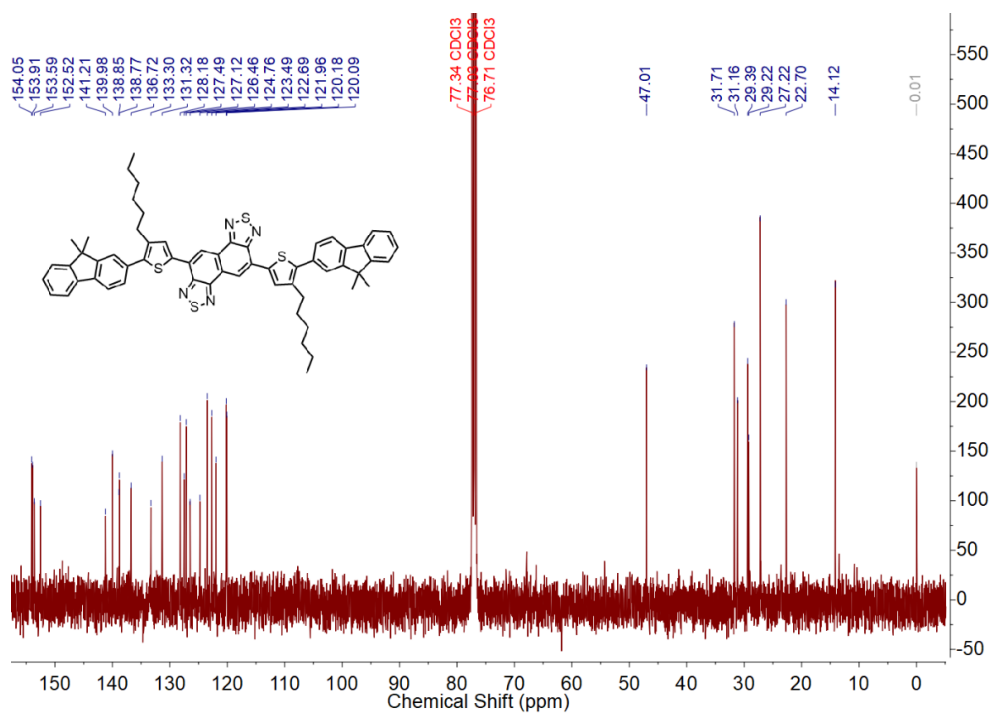

Supplementary Figure 72.  $^{13}\text{C}$  NMR of Flu-NTT in Chloroform-*d*.

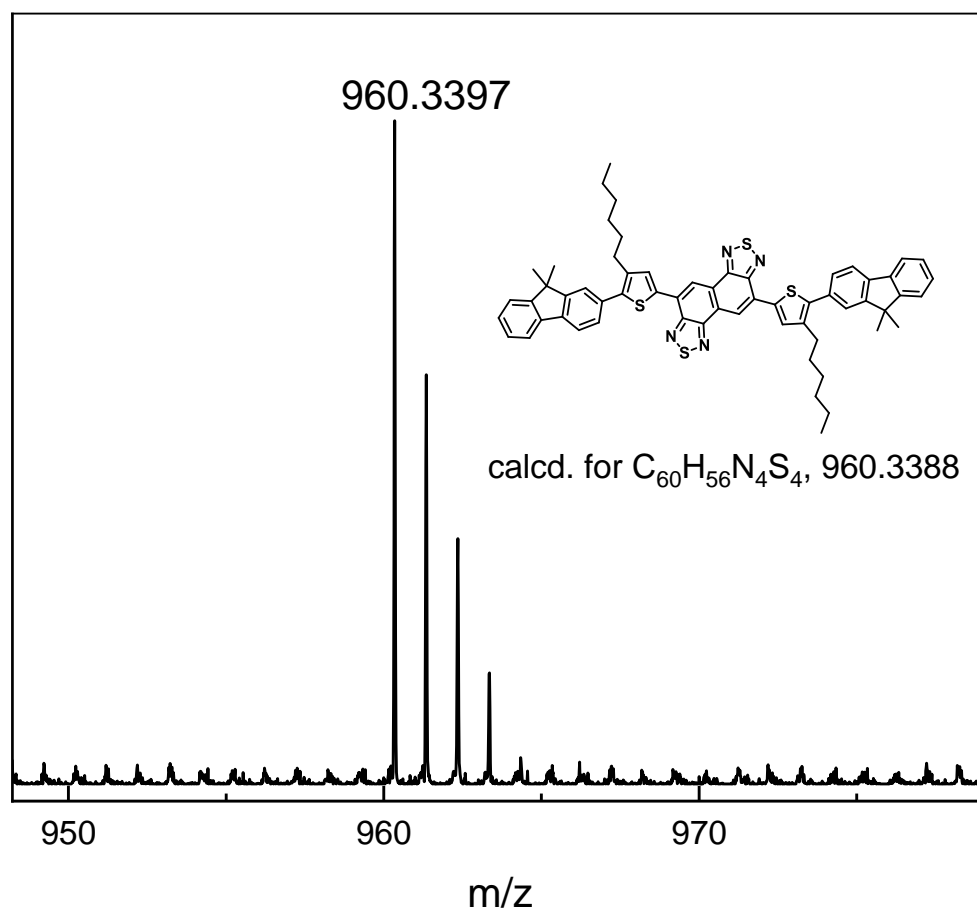

Supplementary Figure 73. MALDI-TOF-MS of Flu-NTT. Calcd for  $\text{C}_{60}\text{H}_{56}\text{N}_4\text{S}_4$ ;  $m/z$ : 960.3397. Found: 960.3388.



Supplementary Information

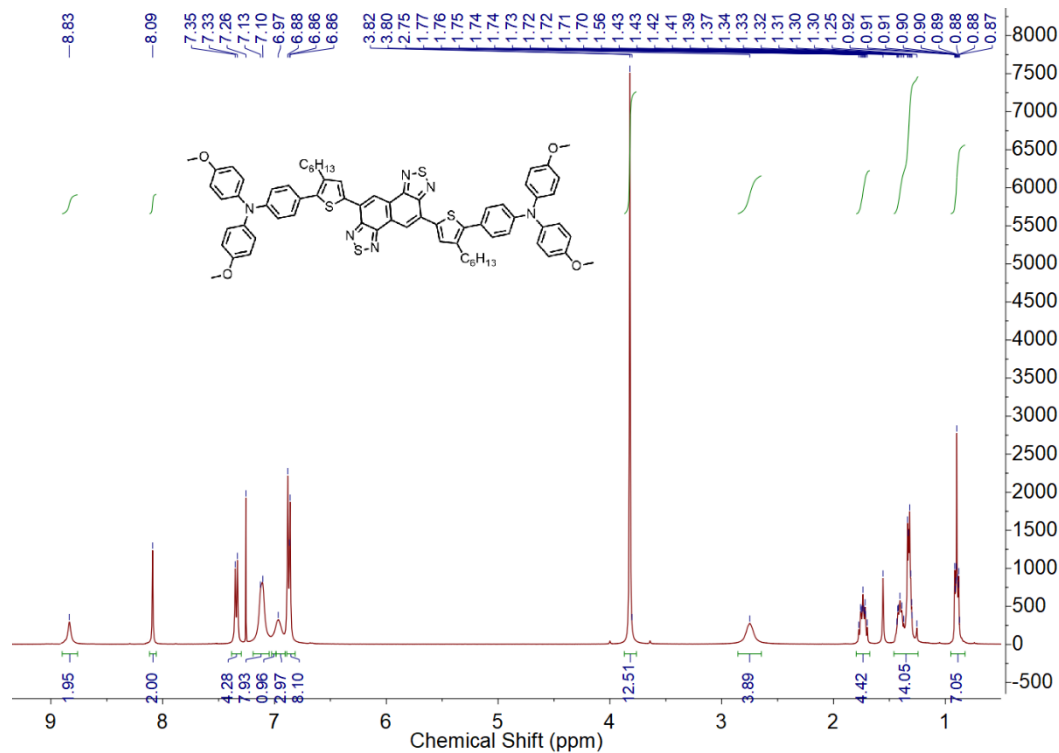

Supplementary Figure 74. The  $^1\text{H}$  NMR spectrum of TPAOMe-NTT in Chloroform-*d*.

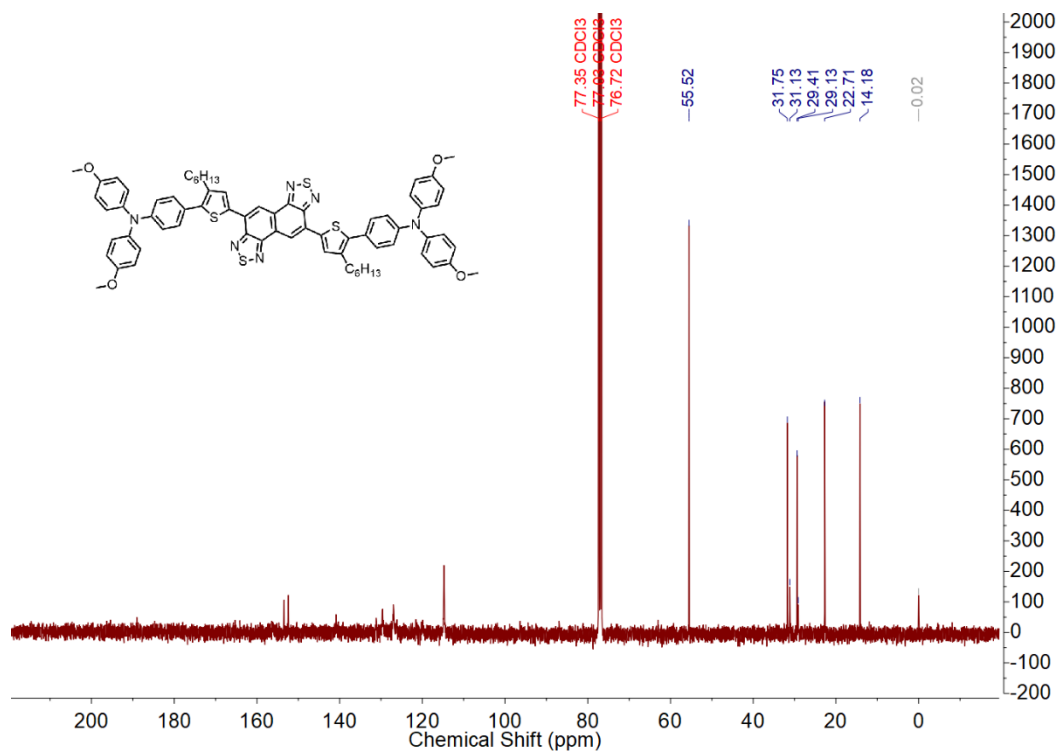

Supplementary Figure 75. The  $^{13}\text{C}$  NMR spectrum of TPAOMe-NTT in Chloroform-*d*.

Supplementary Information

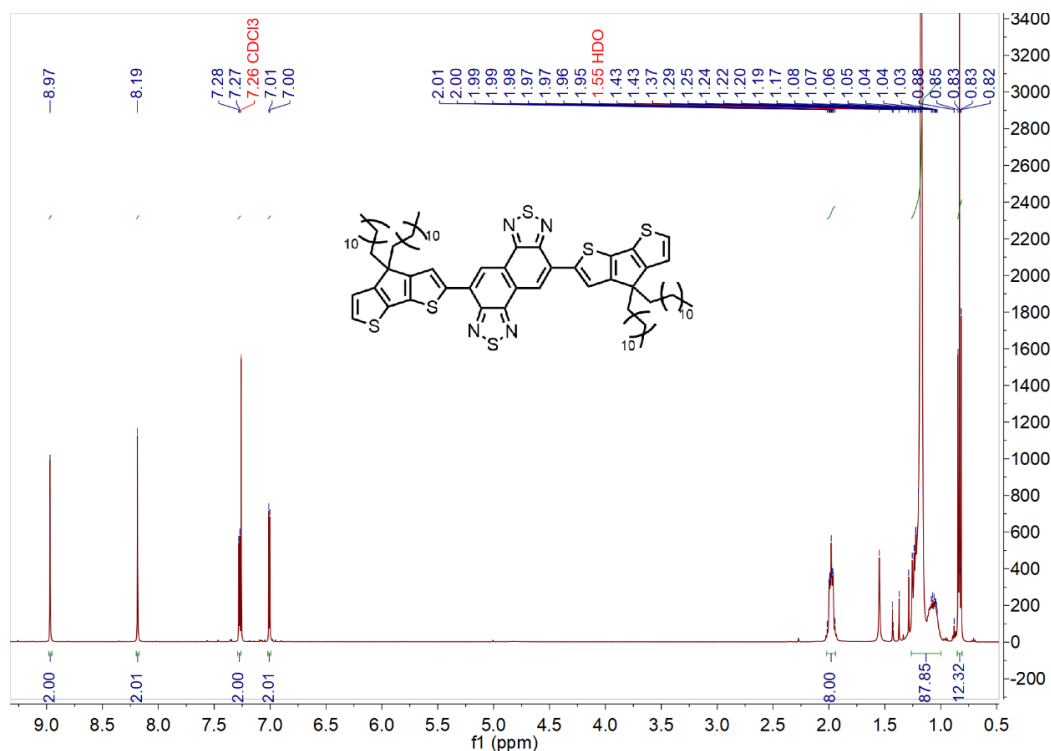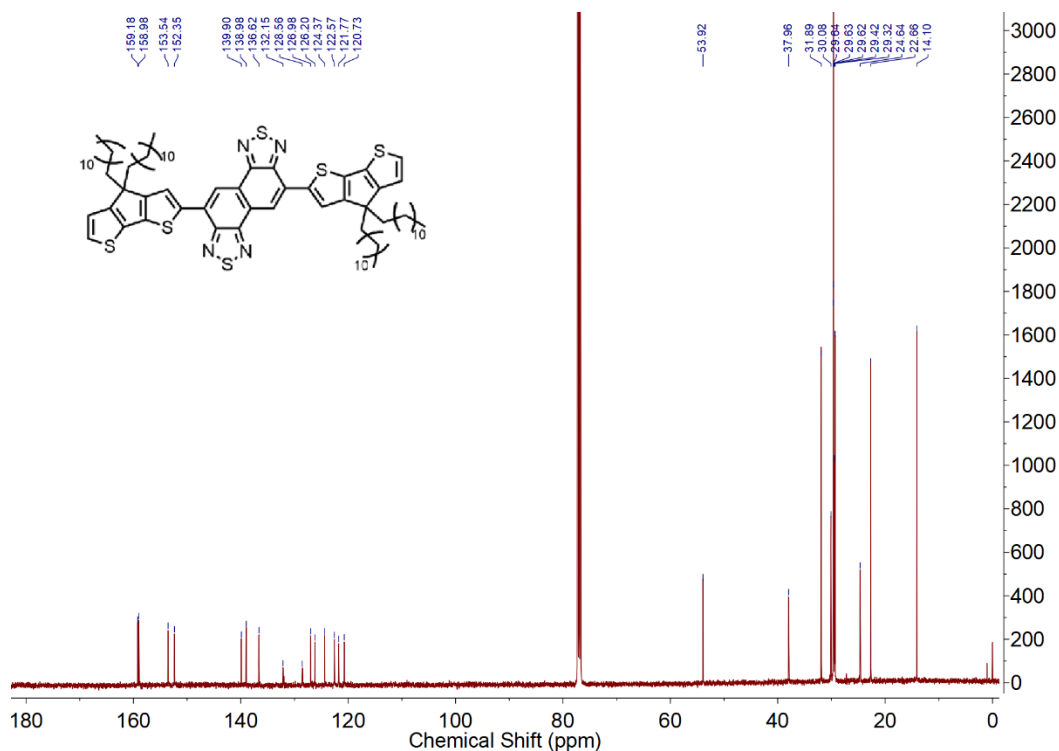

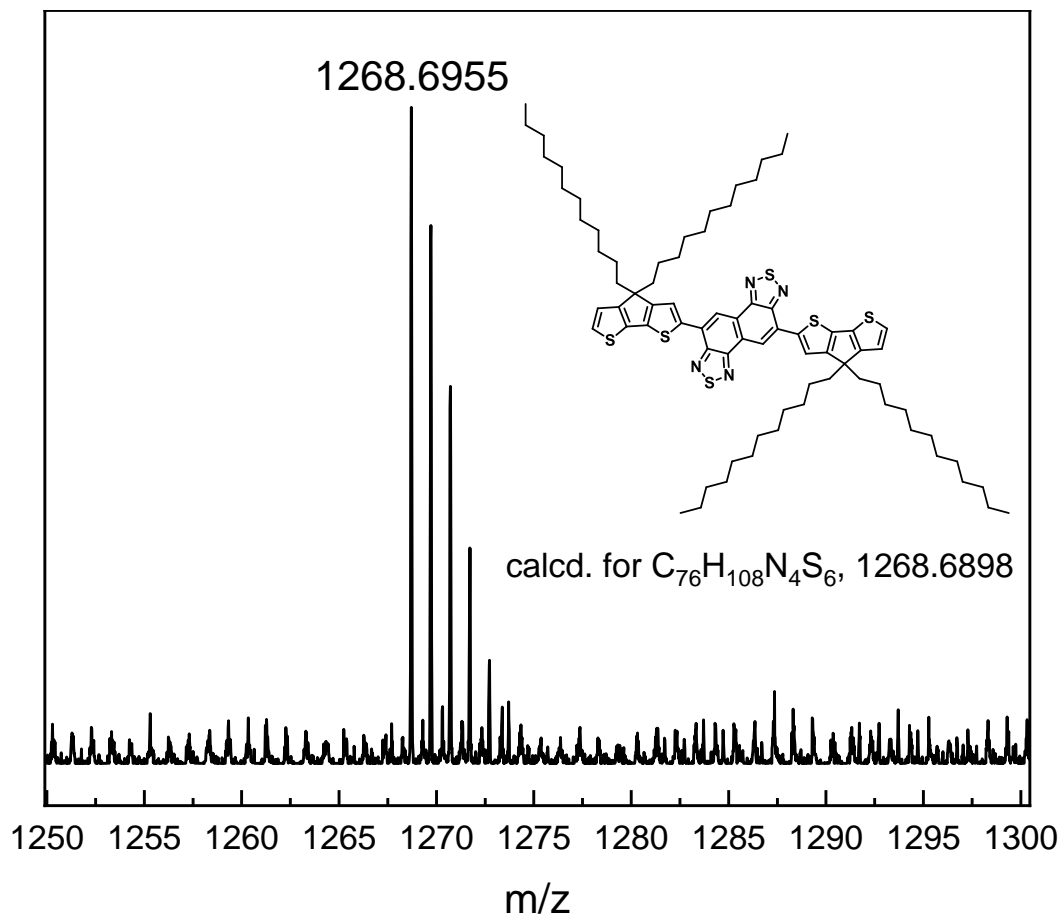

Supplementary Figure 78. MALDI-TOF-MS of NTC. Calcd for  $C_{76}H_{108}N_4S_6$ :  $m/z$ : 1268.6898. Found: 1268.6955.

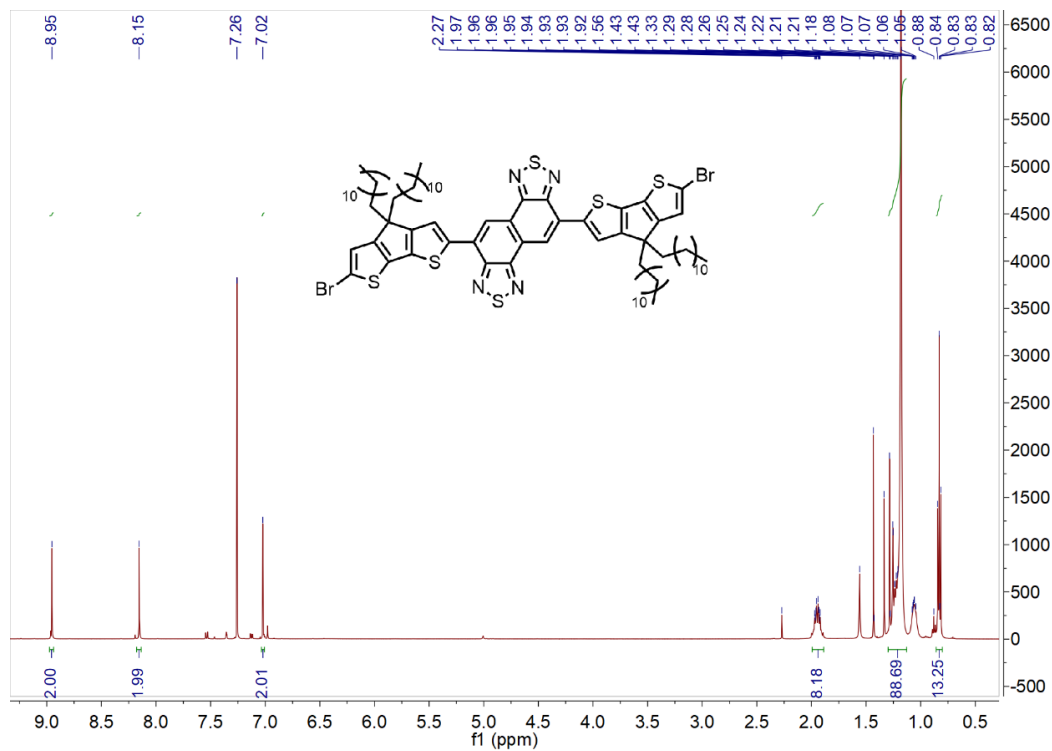

Supplementary Figure 79.  $^1H$  NMR of  $Br_2$ -NTC in Chloroform- $d$ .

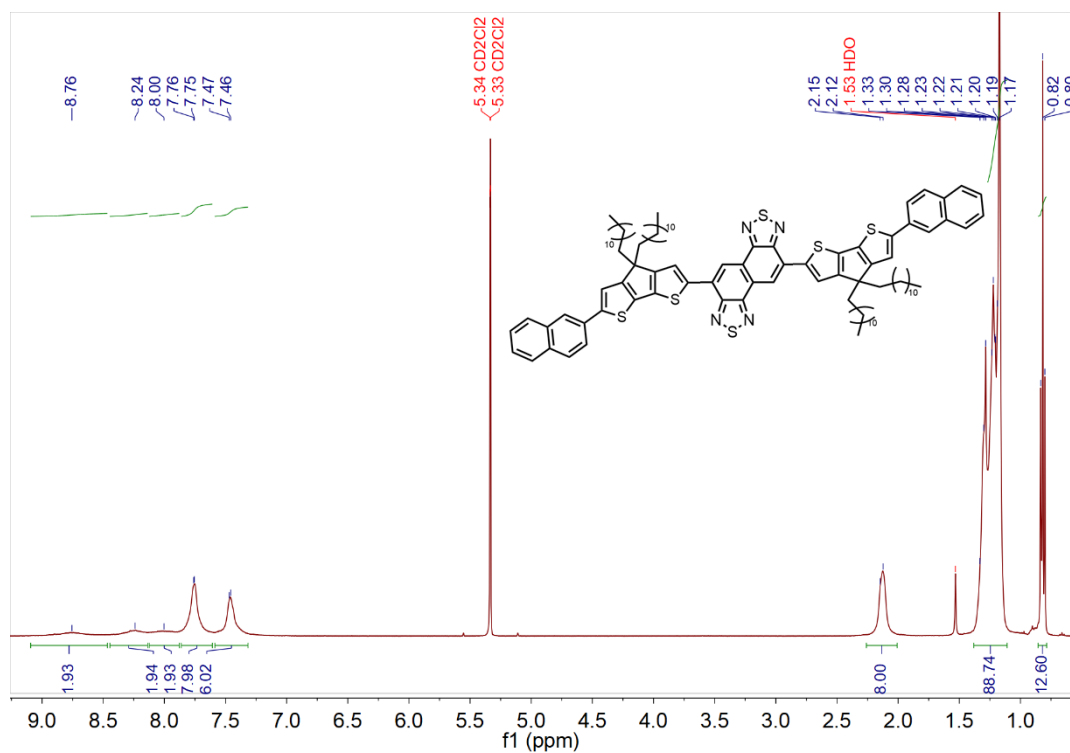

Supplementary Figure 80.  $^1\text{H}$  NMR of 2N-NTC in dichloromethane- $d_2$ .

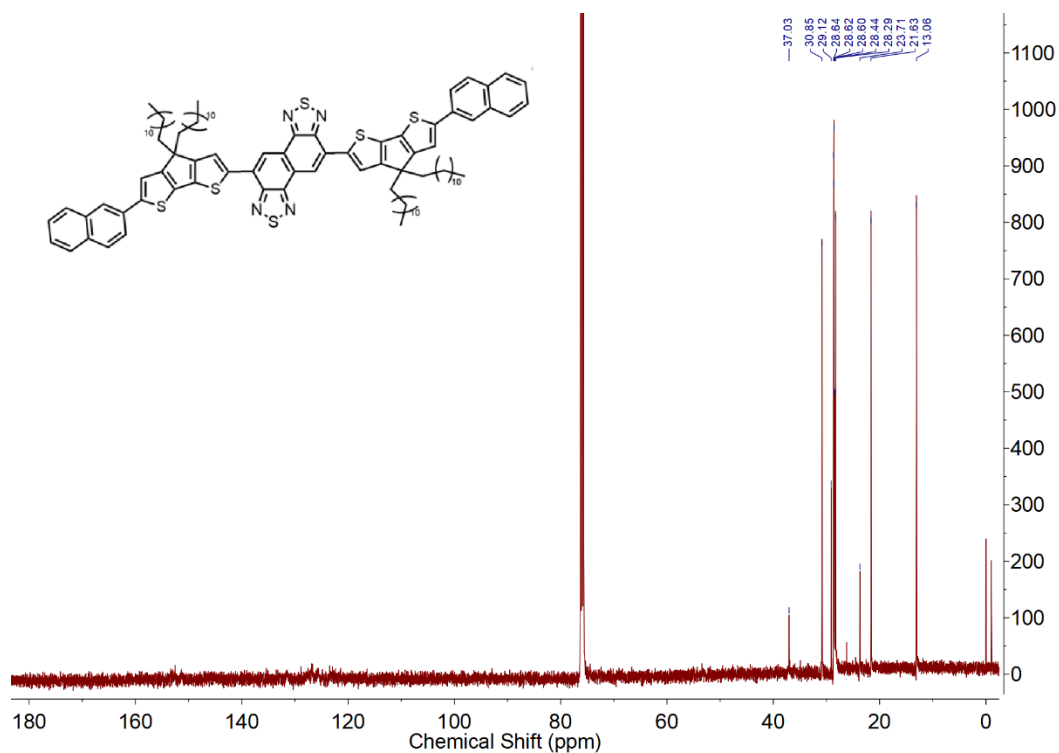

Supplementary Figure 81.  $^{13}\text{C}$  NMR of 2N-NTC in Chloroform- $d$ .

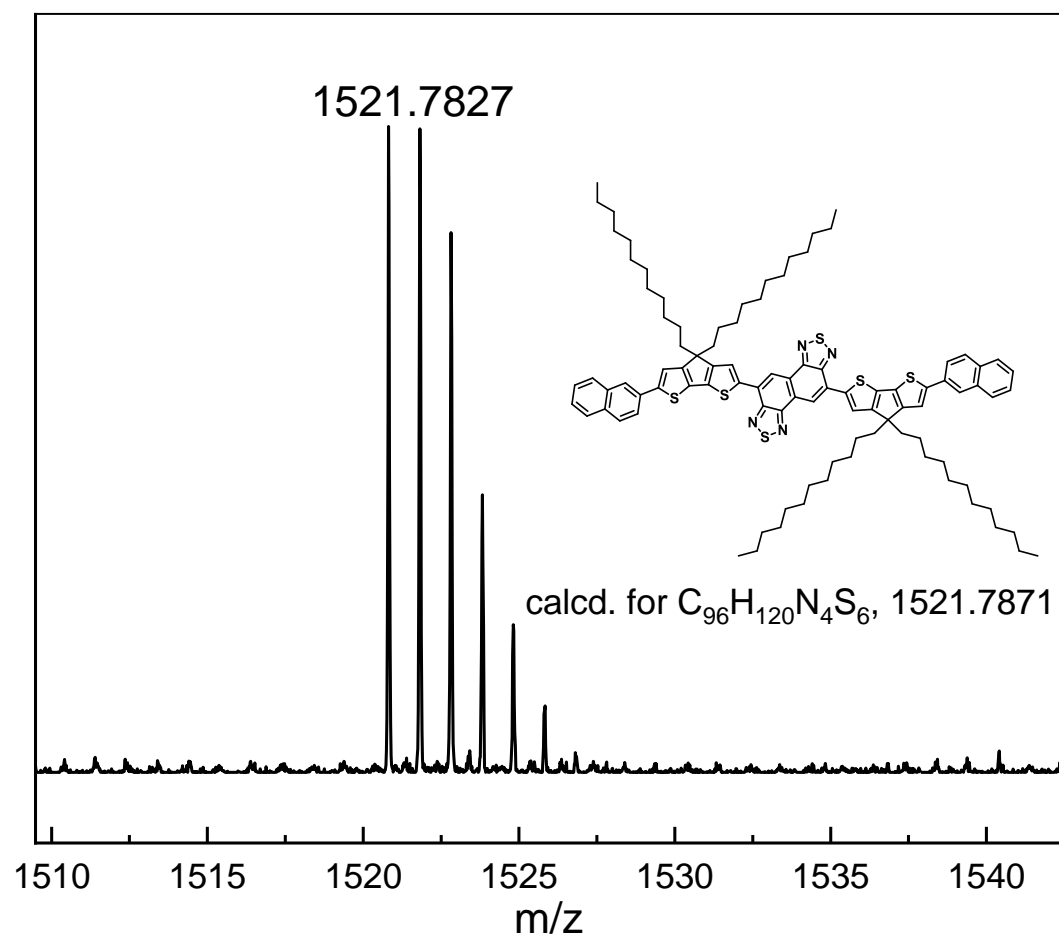

**Supplementary Figure 82.** MALDI-TOF-MS of 2N-NTC. Calcd for  $C_{96}H_{120}N_4S_6$ : m/z: 1521.7871. Found: 1521.7827.

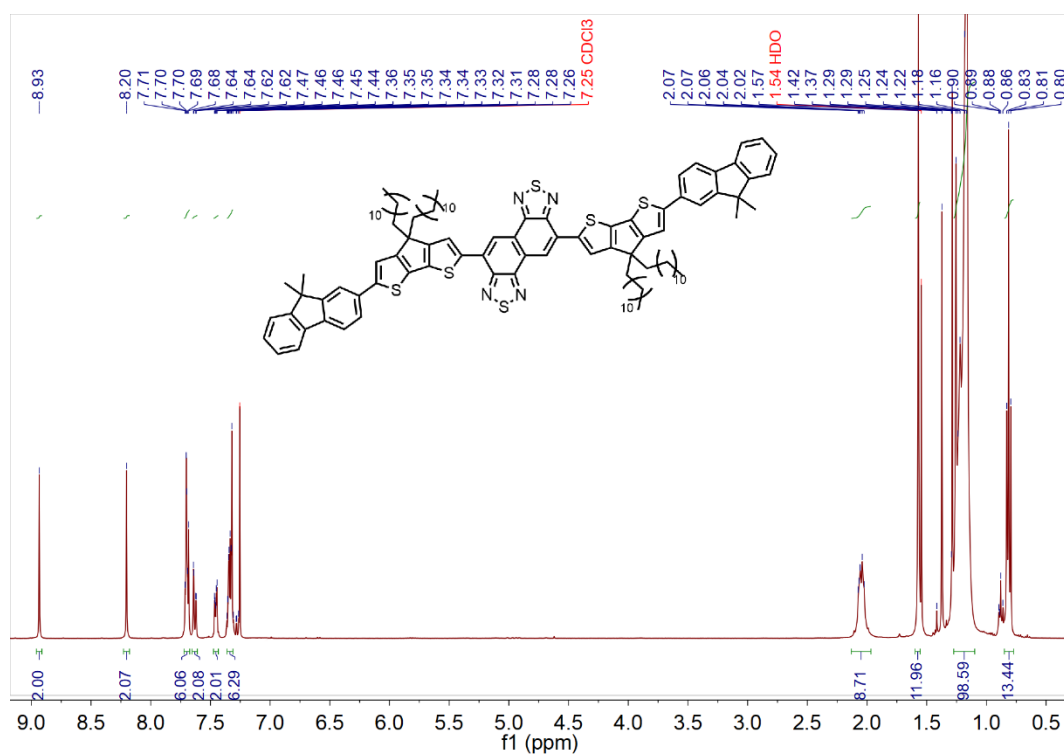

Supplementary Figure 83.  $^1\text{H}$  NMR of Flu-NTC in Chloroform-*d*.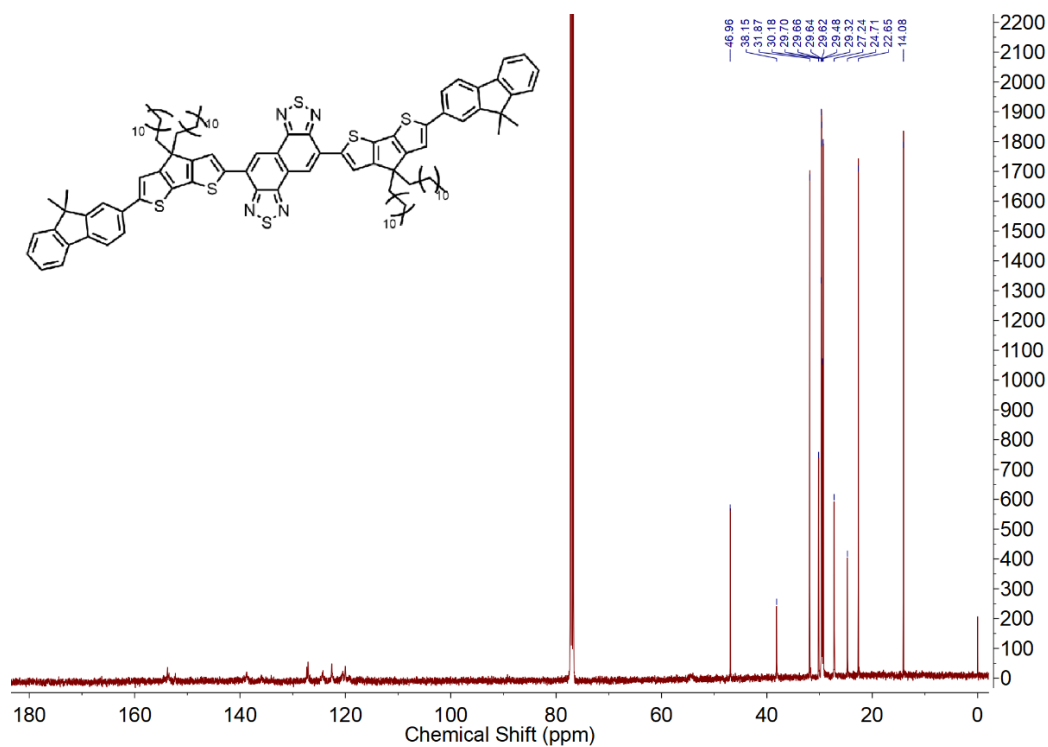Supplementary Figure 84.  $^{13}\text{C}$  NMR of Flu-NTC in Chloroform-*d* (saturated solution).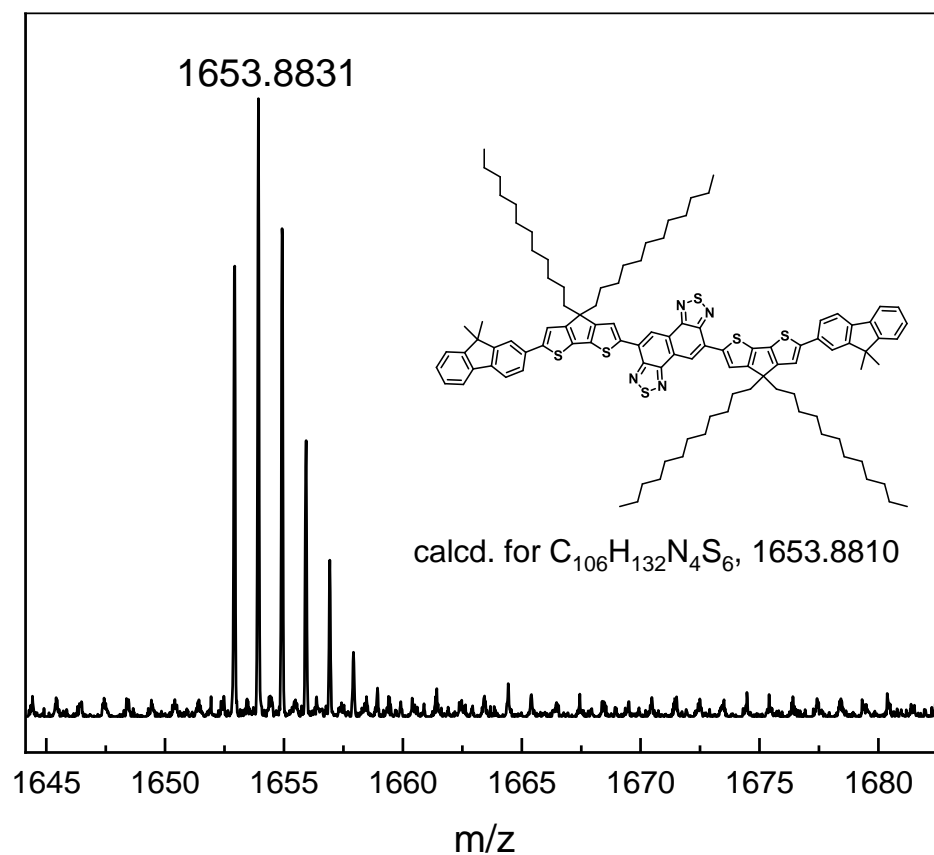Supplementary Figure 85. MALDI-TOF-MS of Flu-NTC. Calcd for  $\text{C}_{106}\text{H}_{132}\text{N}_4\text{S}_6$ ;  $m/z$ : 1653.8810. Found: 1653.8831.

## 2.12. Optimized coordinates

Optimized coordinates for Ph-TDPP singlet state at RB3LYP/6-31G(d,p) level of theory and basis set.

|   |              |             |             |
|---|--------------|-------------|-------------|
| C | -0.14107600  | -1.79427900 | 0.00022200  |
| C | -0.57520400  | -0.41657700 | 0.00102700  |
| C | 0.57520400   | 0.41657700  | 0.00102800  |
| C | 1.72304100   | -0.37957900 | 0.00093000  |
| C | -1.72304100  | 0.37958000  | 0.00092800  |
| C | 0.14107600   | 1.79427900  | 0.00022100  |
| N | -1.29108100  | 1.70483500  | 0.00076600  |
| N | 1.29108000   | -1.70483400 | 0.00076800  |
| C | -2.08242100  | 2.92198700  | 0.00050300  |
| H | -2.71040700  | 2.99451600  | 0.89334100  |
| H | -1.36722600  | 3.74611500  | 0.00018500  |
| C | 2.08242100   | -2.92198700 | 0.00051300  |
| H | 1.36722600   | -3.74611500 | 0.00019800  |
| H | 2.71051400   | -2.99382200 | -0.89230500 |
| O | 0.73642900   | 2.87021100  | -0.00127100 |
| O | -0.73643000  | -2.87021000 | -0.00127000 |
| C | -3.08752600  | -0.07072900 | 0.00161900  |
| C | -3.48153000  | -1.40387700 | -0.00075900 |
| C | -4.87924300  | -1.57733800 | -0.00182700 |
| H | -2.75904000  | -2.21399800 | -0.01087900 |
| C | -5.59716400  | -0.39601200 | -0.00196100 |
| H | -5.35422300  | -2.55072300 | -0.03298100 |
| C | 3.08752600   | 0.07072900  | 0.00162200  |
| C | 3.48153000   | 1.40387700  | -0.00075300 |
| C | 4.87924300   | 1.57733800  | -0.00182200 |
| H | 2.75904000   | 2.21399900  | -0.01087200 |
| C | 5.59716500   | 0.39601200  | -0.00195900 |
| H | 5.35422400   | 2.55072300  | -0.03297500 |
| S | 4.50875600   | -0.97124200 | 0.01156600  |
| S | -4.50875600  | 0.97124200  | 0.01156600  |
| C | -7.05114900  | -0.21344000 | -0.00357300 |
| C | -7.64897700  | 0.95476700  | -0.51183400 |
| C | -7.88970500  | -1.22246400 | 0.50812000  |
| C | -9.03297800  | 1.10736400  | -0.50861700 |
| H | -7.02527400  | 1.73826700  | -0.93208500 |
| C | -9.27310400  | -1.07011300 | 0.50081300  |
| H | -7.44984100  | -2.11884400 | 0.93313500  |
| C | -9.85248000  | 0.09539300  | -0.00568100 |
| H | -9.47256200  | 2.01601100  | -0.90915100 |
| H | -9.90077400  | -1.85996100 | 0.90281100  |
| H | -10.93166400 | 0.21423100  | -0.00628000 |
| C | 7.05114900   | 0.21344000  | -0.00357300 |
| C | 7.64897600   | -0.95476400 | -0.51184200 |
| C | 7.88970600   | 1.22246000  | 0.50812600  |
| C | 9.03297800   | -1.10736200 | -0.50862600 |
| H | 7.02527300   | -1.73826200 | -0.93209600 |
| C | 9.27310500   | 1.07011000  | 0.50081700  |
| H | 7.44984200   | 2.11883700  | 0.93314600  |
| C | 9.85248000   | -0.09539400 | -0.00568500 |
| H | 9.47256200   | -2.01600600 | -0.90916700 |
| H | 9.90077500   | 1.85995500  | 0.90281900  |
| H | 10.93166400  | -0.21423100 | -0.00628600 |
| H | 2.71040500   | -2.99451100 | 0.89335300  |
| H | -2.71051200  | 2.99381800  | -0.89231700 |

## Supplementary Information

Optimized coordinates for 1N-TDPP singlet state at RB3LYP/6-31G(d,p) level of theory and basis set.

|   |              |             |             |
|---|--------------|-------------|-------------|
| C | -0.28480600  | -1.63249900 | -0.70244500 |
| C | -0.60532100  | -0.32234300 | -0.18560300 |
| C | 0.60531800   | 0.32236800  | 0.18555800  |
| C | 1.68118100   | -0.52859200 | -0.07567500 |
| C | -1.68118300  | 0.52861600  | 0.07563200  |
| C | 0.28480300   | 1.63252500  | 0.70239700  |
| N | -1.14560700  | 1.70036800  | 0.60733300  |
| N | 1.14560500   | -1.70034300 | -0.60738000 |
| C | -1.83466600  | 2.90012900  | 1.04704000  |
| H | -2.52186900  | 2.69089000  | 1.87214700  |
| H | -1.05808400  | 3.58310700  | 1.39511100  |
| C | 1.83466400   | -2.90010500 | -1.04708500 |
| H | 1.05808200   | -3.58307800 | -1.39516800 |
| H | 2.52187600   | -2.69086300 | -1.87218400 |
| O | 0.96259500   | 2.55766100  | 1.14586300  |
| O | -0.96259700  | -2.55763500 | -1.14591300 |
| C | -3.07466400  | 0.25888900  | -0.15464600 |
| C | -3.57317000  | -0.92096100 | -0.69412300 |
| C | -4.97833000  | -0.93761300 | -0.81245300 |
| H | -2.91975800  | -1.73365400 | -0.99589200 |
| C | -5.59622400  | 0.21887600  | -0.37639500 |
| H | -5.52929100  | -1.76512900 | -1.24283100 |
| C | 3.07466100   | -0.25886800 | 0.15461200  |
| C | 3.57316800   | 0.92098700  | 0.69408000  |
| C | 4.97832800   | 0.93763100  | 0.81242600  |
| H | 2.91975800   | 1.73368800  | 0.99582900  |
| C | 5.59621900   | -0.21886800 | 0.37639400  |
| H | 5.52928800   | 1.76515000  | 1.24279900  |
| S | 4.40469700   | -1.35478900 | -0.20994300 |
| S | -4.40470200  | 1.35479700  | 0.20994000  |
| H | 2.38445200   | -3.37206900 | -0.22746600 |
| H | -2.38446400  | 3.37208700  | 0.22742400  |
| C | -7.02053600  | 0.58985000  | -0.39825100 |
| C | -8.04547100  | -0.31088500 | 0.06574600  |
| C | -7.38733500  | 1.83584800  | -0.89007200 |
| C | -7.76835300  | -1.56823000 | 0.66873800  |
| C | -9.41892500  | 0.09211200  | -0.05155800 |
| C | -8.73843400  | 2.22947600  | -0.97944000 |
| H | -6.61515400  | 2.50887100  | -1.24941900 |
| C | -8.78462500  | -2.39695000 | 1.09078000  |
| H | -6.73776700  | -1.86806700 | 0.81459000  |
| C | -10.44207600 | -0.79209700 | 0.38503100  |
| C | -9.73536100  | 1.36995800  | -0.58280400 |
| H | -8.98301700  | 3.20769200  | -1.38187200 |
| C | -10.13683000 | -2.01385600 | 0.93738900  |
| H | -8.54438000  | -3.34973100 | 1.55318000  |
| H | -11.47699100 | -0.47728400 | 0.28027400  |
| H | -10.77995800 | 1.65778000  | -0.66470600 |
| H | -10.92893200 | -2.67861400 | 1.26873900  |
| C | 7.02052800   | -0.58985300 | 0.39827900  |
| C | 8.04547700   | 0.31086400  | -0.06572200 |
| C | 7.38731000   | -1.83584300 | 0.89013300  |
| C | 7.76837700   | 1.56819700  | -0.66874800 |
| C | 9.41892600   | -0.09213900 | 0.05161400  |
| C | 8.73840500   | -2.22947700 | 0.97953300  |
| H | 6.61511800   | -2.50885200 | 1.24948300  |
| C | 8.78466100   | 2.39690100  | -1.09079200 |
| H | 6.73779400   | 1.86803800  | -0.81462300 |
| C | 10.44209000  | 0.79205400  | -0.38497900 |
| C | 9.73534400   | -1.36997600 | 0.58289500  |
| H | 8.98297400   | -3.20768700 | 1.38199100  |
| C | 10.13686100  | 2.01380200  | -0.93737000 |
| H | 8.54443000   | 3.34967200  | -1.55321900 |
| H | 11.47700100  | 0.47723600  | -0.28019700 |
| H | 10.77993900  | -1.65780200 | 0.66482200  |
| H | 10.92897300  | 2.67854700  | -1.26872200 |



## Supplementary Information

Optimized coordinates for 2N-TDPP singlet state at RB3LYP/6-31G(d,p) level of theory and basis set.

|   |              |             |             |
|---|--------------|-------------|-------------|
| C | -0.22437700  | 1.76857200  | 0.24712400  |
| C | -0.59369800  | 0.38362100  | 0.06815500  |
| C | 0.59369800   | -0.38361800 | -0.06817200 |
| C | 1.70305000   | 0.46143300  | 0.01695100  |
| C | -1.70305000  | -0.46143000 | -0.01696500 |
| C | 0.22437600   | -1.76856900 | -0.24714000 |
| N | -1.20975700  | -1.75147200 | -0.20583400 |
| N | 1.20975700   | 1.75147500  | 0.20582300  |
| C | -1.94322000  | -2.99525200 | -0.35631300 |
| H | -2.59132000  | -2.97678900 | -1.23746700 |
| H | -1.19067900  | -3.77503900 | -0.48402200 |
| C | 1.94322000   | 2.99525600  | 0.35629600  |
| H | 1.19067800   | 3.77504200  | 0.48400800  |
| H | 2.59132400   | 2.97679500  | 1.23744600  |
| O | 0.86906100   | -2.80361000 | -0.40620000 |
| O | -0.86906100  | 2.80361300  | 0.40618400  |
| C | -3.08613000  | -0.08361200 | 0.07082600  |
| C | -3.54179700  | 1.21601900  | 0.26394300  |
| C | -4.94463400  | 1.31817500  | 0.31861300  |
| H | -2.85750900  | 2.05192600  | 0.37090200  |
| C | -5.60775800  | 0.11365900  | 0.16905400  |
| H | -5.46349900  | 2.25286700  | 0.49515100  |
| C | 3.08612900   | 0.08361400  | -0.07084000 |
| C | 3.54179700   | -1.21601600 | -0.26396500 |
| C | 4.94463400   | -1.31817200 | -0.31863000 |
| H | 2.85750900   | -2.05192100 | -0.37093300 |
| C | 5.60775900   | -0.11365800 | -0.16905700 |
| H | 5.46349900   | -2.25286200 | -0.49517300 |
| S | 4.45693100   | 1.18392000  | 0.05129100  |
| S | -4.45693100  | -1.18391900 | -0.05128900 |
| H | 2.54267500   | 3.21924000  | -0.53100100 |
| H | -2.54268000  | -3.21923700 | 0.53098000  |
| C | -11.61547500 | 1.45508700  | -0.50171300 |
| C | -10.25960000 | 1.68958200  | -0.51094900 |
| C | -9.34110700  | 0.65978200  | -0.16638900 |
| C | -9.85264500  | -0.63161600 | 0.18611100  |
| C | -11.25603000 | -0.84045300 | 0.18617200  |
| C | -12.11934700 | 0.17873200  | -0.14936700 |
| H | -7.56576000  | 1.84321900  | -0.47343200 |
| H | -12.30652500 | 2.25018000  | -0.76537700 |
| H | -9.87146900  | 2.66807300  | -0.78113100 |
| C | -7.94077900  | 0.86971800  | -0.17173500 |
| C | -8.92638900  | -1.65560200 | 0.52206600  |
| H | -11.63939400 | -1.82102400 | 0.45584700  |
| H | -13.19160800 | 0.00731400  | -0.14627500 |
| C | -7.57435000  | -1.42117100 | 0.51656000  |
| C | -7.04962600  | -0.13952000 | 0.16789900  |
| H | -9.30630100  | -2.63607900 | 0.79648900  |
| H | -6.89090900  | -2.21457800 | 0.80345300  |
| C | 7.57435300   | 1.42117700  | -0.51653000 |
| C | 8.92639200   | 1.65560800  | -0.52202600 |
| C | 9.85264700   | 0.63161500  | -0.18608500 |
| C | 9.34110600   | -0.65978800 | 0.16639200  |
| C | 7.94077800   | -0.86972400 | 0.17172800  |
| C | 7.04962700   | 0.13952100  | -0.16789300 |
| H | 11.63939700  | 1.82102700  | -0.45579300 |
| H | 6.89091400   | 2.21459000  | -0.80341100 |
| H | 9.30630700   | 2.63608900  | -0.79643100 |
| C | 11.25603200  | 0.84045200  | -0.18613600 |
| C | 10.25959700  | -1.68959400 | 0.51093900  |
| H | 7.56575700   | -1.84322900 | 0.47340900  |
| C | 11.61547200  | -1.45510000 | 0.50171200  |
| C | 12.11934600  | -0.17873900 | 0.14939000  |
| H | 9.87146600   | -2.66809000 | 0.78110300  |
| H | 12.30652100  | -2.25019700 | 0.76536600  |
| H | 13.19160800  | -0.00732100 | 0.14630500  |

## Supplementary Information

Optimized coordinates for An-TDPP singlet state at RB3LYP/6-31G(d,p) level of theory and basis set.

|   |              |             |             |
|---|--------------|-------------|-------------|
| C | -0.13195800  | 0.00036900  | 1.79506800  |
| C | -0.57361100  | 0.00008500  | 0.41992500  |
| C | 0.57361000   | -0.00008300 | -0.41992800 |
| C | 1.72387700   | 0.00008400  | 0.36987700  |
| C | -1.72387800  | -0.00008400 | -0.36988000 |
| C | 0.13195700   | -0.00037100 | -1.79507100 |
| N | -1.30050000  | -0.00035800 | -1.69722400 |
| N | 1.30049900   | 0.00035600  | 1.69722100  |
| C | -2.09929100  | -0.00061500 | -2.90982700 |
| H | -2.72800800  | 0.89195100  | -2.97835300 |
| H | -1.38913500  | -0.00078700 | -3.73827300 |
| C | 2.09928900   | 0.00060000  | 2.90982500  |
| H | 1.38913300   | 0.00077200  | 3.73827100  |
| H | 2.72800100   | -0.89197200 | 2.97834500  |
| O | 0.72082300   | -0.00059200 | -2.87427600 |
| O | -0.72082400  | 0.00058700  | 2.87427300  |
| C | -3.08986800  | 0.00000400  | 0.08699100  |
| C | -3.47587000  | 0.00027200  | 1.42030600  |
| C | -4.87892600  | 0.00030700  | 1.60013500  |
| H | -2.75017800  | 0.00043500  | 2.22767200  |
| C | -5.59592500  | 0.00006800  | 0.42520900  |
| H | -5.35985200  | 0.00050100  | 2.57153800  |
| C | 3.08986800   | -0.00000500 | -0.08699400 |
| C | 3.47587000   | -0.00027400 | -1.42030900 |
| C | 4.87892700   | -0.00030600 | -1.60013700 |
| H | 2.75017900   | -0.00043800 | -2.22767500 |
| C | 5.59592600   | -0.00006300 | -0.42521000 |
| H | 5.35985400   | -0.00049800 | -2.57154000 |
| S | 4.51630500   | 0.00020600  | 0.94837200  |
| S | -4.51630600  | -0.00020400 | -0.94837400 |
| C | -7.10708000  | 2.49784700  | 0.23721200  |
| C | -7.76320200  | 1.22941300  | 0.14100200  |
| C | -7.81174100  | 3.66925500  | 0.14311200  |
| C | -7.06723600  | 0.00003500  | 0.23274400  |
| C | -9.19455300  | 1.22150200  | -0.05480800 |
| C | -9.22218100  | 3.65777800  | -0.05358200 |
| H | -7.29157300  | 4.61940000  | 0.22077300  |
| C | -7.76318400  | -1.22937200 | 0.14125300  |
| C | -9.86788700  | -0.00002500 | -0.14918300 |
| C | -9.89038700  | 2.46726700  | -0.14819200 |
| H | -9.76210000  | 4.59709200  | -0.12580200 |
| C | -7.10704500  | -2.49777600 | 0.23774200  |
| C | -9.19453400  | -1.22152200 | -0.05456300 |
| H | -10.94510300 | -0.00004800 | -0.29898100 |
| H | -10.96685200 | 2.44563600  | -0.29583400 |
| C | -7.81168900  | -3.66921300 | 0.14387900  |
| H | -6.03457900  | -2.51946200 | 0.39524100  |
| C | -9.89034900  | -2.46731600 | -0.14769700 |
| C | -9.22212700  | -3.65779800 | -0.05283600 |
| H | -7.29150900  | -4.61933500 | 0.22175000  |
| H | -10.96681300 | -2.44573200 | -0.29535200 |
| H | -9.76203100  | -4.59713400 | -0.12486700 |
| C | 7.10703600   | 2.49778000  | -0.23763600 |
| C | 7.76318000   | 1.22937500  | -0.14119800 |
| C | 7.81167500   | 3.66921700  | -0.14372100 |
| C | 7.06723600   | -0.00003100 | -0.23274300 |
| C | 9.19452900   | 1.22152200  | 0.05462000  |
| C | 9.22211200   | 3.65779900  | 0.05299900  |
| H | 7.29149100   | 4.61934000  | -0.22155300 |
| C | 7.76320800   | -1.22941000 | -0.14105500 |
| C | 9.86788700   | 0.00002400  | 0.14918600  |
| C | 9.89033900   | 2.46731500  | 0.14781000  |
| H | 9.76201200   | 4.59713400  | 0.12507200  |
| C | 7.10709000   | -2.49784300 | -0.23731600 |
| C | 9.19455800   | -1.22150100 | 0.05475600  |
| H | 10.94510300  | 0.00004500  | 0.29898400  |
| H | 10.96680300  | 2.44572900  | 0.29546600  |
| C | 7.81175700   | -3.66925200 | -0.14326600 |

## Supplementary Information

---

|   |             |             |             |
|---|-------------|-------------|-------------|
| H | 6.03462000  | -2.51957400 | -0.39478900 |
| C | 9.89039800  | -2.46726800 | 0.14808500  |
| C | 9.22219700  | -3.65777800 | 0.05342600  |
| H | 7.29159200  | -4.61939600 | -0.22096600 |
| H | 10.96686300 | -2.44563900 | 0.29572700  |
| H | 9.76211900  | -4.59709200 | 0.12560500  |
| H | 6.03457000  | 2.51946900  | -0.39513800 |
| H | -6.03461100 | 2.51958000  | 0.39468800  |
| H | 2.72800800  | 0.89319400  | 2.97798000  |
| H | -2.72800200 | -0.89321400 | -2.97797800 |

Optimized coordinates for Py-TDPP singlet state at RB3LYP/6-31G(d,p) level of theory and basis set.

|   |             |             |             |
|---|-------------|-------------|-------------|
| C | 0.08431800  | 0.68272300  | 1.11888600  |
| C | 0.52433300  | -0.47739500 | 0.37937200  |
| C | -0.62271900 | -1.17955300 | -0.07841000 |
| C | -1.77353500 | -0.50775900 | 0.33959100  |
| C | 1.67528000  | -1.14522400 | -0.04492800 |
| C | -0.18263700 | -2.33854400 | -0.81989900 |
| N | 1.24913600  | -2.26103900 | -0.76340400 |
| N | -1.34754900 | 0.60845400  | 1.05745300  |
| C | 2.04614600  | -3.28627100 | -1.41251500 |
| H | 2.67407800  | -3.82254300 | -0.69500000 |
| H | 1.33490200  | -3.98492600 | -1.85602700 |
| C | -2.14425700 | 1.62809500  | 1.71589100  |
| H | -1.43283300 | 2.31436700  | 2.17804700  |
| H | -2.76143200 | 2.18149900  | 1.00206600  |
| O | -0.77327600 | -3.24580400 | -1.40298000 |
| O | 0.67496200  | 1.58697800  | 1.70671100  |
| C | 3.03865500  | -0.76405100 | 0.20388200  |
| C | 3.42697900  | 0.35054800  | 0.93825800  |
| C | 4.82471900  | 0.50640800  | 1.03064200  |
| H | 2.70136500  | 1.01615400  | 1.39537300  |
| C | 5.54944400  | -0.47416800 | 0.37818200  |
| H | 5.29803400  | 1.29890000  | 1.59759100  |
| C | -3.13711800 | -0.88747600 | 0.08688300  |
| C | -3.52520900 | -2.01243300 | -0.63052700 |
| C | -4.92299900 | -2.15097200 | -0.74415700 |
| H | -2.79987700 | -2.69660700 | -1.05971300 |
| C | -5.64846300 | -1.14310500 | -0.13712800 |
| H | -5.40104300 | -2.96250300 | -1.28048000 |
| S | -4.56168100 | 0.00115000  | 0.62126300  |
| S | 4.46441500  | -1.61820200 | -0.37983300 |
| C | 7.00286500  | -0.67594700 | 0.30411300  |
| C | 7.90543000  | 0.39047400  | 0.02828900  |
| C | 7.51925900  | -1.96544400 | 0.52901900  |
| C | 9.31415800  | 0.13148800  | 0.04835100  |
| C | 7.47203700  | 1.71935900  | -0.31016100 |
| C | 8.88208600  | -2.21811200 | 0.53033400  |
| H | 6.82809800  | -2.77407500 | 0.74491100  |
| C | 10.24429300 | 1.18845100  | -0.19805400 |
| C | 9.80498300  | -1.18462800 | 0.30850100  |
| C | 8.36072700  | 2.72301700  | -0.55094700 |
| H | 6.41022900  | 1.91465900  | -0.39400200 |
| H | 9.24572900  | -3.22299400 | 0.72594300  |
| C | 9.77619000  | 2.50500200  | -0.48764600 |
| C | 11.65045800 | 0.93410000  | -0.16082900 |
| C | 11.22178300 | -1.41203100 | 0.33556400  |
| H | 8.00161700  | 3.71516900  | -0.81114800 |
| C | 10.70681300 | 3.53078600  | -0.72112900 |
| C | 12.54352200 | 1.99135400  | -0.39821400 |
| C | 12.10463600 | -0.39979500 | 0.11570400  |
| H | 11.57678200 | -2.41872900 | 0.53875600  |
| C | 12.07497000 | 3.27450000  | -0.67366400 |
| H | 10.34552200 | 4.53136200  | -0.94240100 |
| H | 13.61201300 | 1.79629600  | -0.36647000 |
| H | 13.17480600 | -0.58653600 | 0.14183900  |
| H | 12.78140100 | 4.07895600  | -0.85546600 |
| C | -7.11257100 | -1.07525800 | 0.00009000  |

## Supplementary Information

---

|   |              |             |             |
|---|--------------|-------------|-------------|
| C | -7.88469400  | 0.09588800  | -0.23804600 |
| C | -7.76925700  | -2.25760100 | 0.38864700  |
| C | -9.30161900  | 0.04941600  | -0.02930600 |
| C | -7.31934000  | 1.32705100  | -0.72138100 |
| C | -9.14231600  | -2.30646300 | 0.57325100  |
| H | -7.17160700  | -3.14291900 | 0.57941900  |
| C | -10.10014000 | 1.21593200  | -0.24089800 |
| C | -9.93307900  | -1.16278800 | 0.38601200  |
| C | -8.08351700  | 2.43540800  | -0.92733100 |
| H | -6.26024800  | 1.36468800  | -0.94335600 |
| H | -9.61336300  | -3.23369500 | 0.88748000  |
| C | -9.49568100  | 2.43095900  | -0.68204300 |
| C | -11.51140900 | 1.17387000  | -0.01682800 |
| C | -11.35226900 | -1.17707900 | 0.60016900  |
| H | -7.62605300  | 3.34869600  | -1.29834800 |
| C | -10.29719800 | 3.56737000  | -0.87916900 |
| C | -12.27226400 | 2.33553600  | -0.22462000 |
| C | -12.10699400 | -0.06042800 | 0.41183500  |
| H | -11.81409800 | -2.10726900 | 0.91986400  |
| C | -11.66998200 | 3.51810700  | -0.64967100 |
| H | -9.83209300  | 4.48968700  | -1.21631700 |
| H | -13.34436400 | 2.30167900  | -0.05086400 |
| H | -13.18027700 | -0.08568600 | 0.57988700  |
| H | -12.27559700 | 4.40586700  | -0.80572900 |
| H | -2.78412100  | 1.19960300  | 2.49286500  |
| H | 2.67517700   | -2.86747200 | -2.20358200 |

Optimized coordinates for TDPP singlet state at RB3LYP/6-31G(d,p) level of theory and basis set.

|   |             |             |             |
|---|-------------|-------------|-------------|
| C | 0.09942100  | -1.79714000 | 0.00004100  |
| C | 0.56596900  | -0.43032700 | 0.00009100  |
| C | -0.56596900 | 0.43032700  | 0.00009100  |
| C | -1.72999300 | -0.33818500 | 0.00003700  |
| C | 1.72999300  | 0.33818600  | 0.00004000  |
| C | -0.09942100 | 1.79714000  | 0.00004400  |
| N | 1.33132200  | 1.67292300  | 0.00001600  |
| N | -1.33132200 | -1.67292300 | 0.00001100  |
| C | 2.15188000  | 2.87062500  | 0.00002300  |
| H | 2.78142000  | 2.92755600  | -0.89287100 |
| H | 1.45693700  | 3.71187200  | 0.00004800  |
| C | -2.15188100 | -2.87062500 | 0.00001600  |
| H | -1.45693700 | -3.71187200 | 0.00004000  |
| H | -2.78145200 | -2.92752300 | 0.89288900  |
| O | -0.66798900 | 2.88698600  | 0.00003400  |
| O | 0.66798900  | -2.88698600 | 0.00003000  |
| C | 3.08728500  | -0.14476400 | 0.00000800  |
| C | 3.44935900  | -1.48492300 | 0.00003100  |
| C | 4.85027000  | -1.68912800 | -0.00001500 |
| H | 2.70827300  | -2.27805100 | 0.00007600  |
| C | 5.56345500  | -0.51826500 | -0.00007100 |
| H | 5.31377400  | -2.66857400 | -0.00000600 |
| C | -3.08728500 | 0.14476400  | 0.00000500  |
| C | -3.44935900 | 1.48492300  | 0.00002900  |
| C | -4.85027100 | 1.68912700  | -0.00001800 |
| H | -2.70827400 | 2.27805100  | 0.00007600  |
| C | -5.56345500 | 0.51826400  | -0.00007700 |
| H | -5.31377500 | 2.66857300  | -0.00000800 |
| S | -4.53205400 | -0.86708900 | -0.00007800 |
| S | 4.53205400  | 0.86708900  | -0.00007100 |
| H | -2.78141900 | -2.92755400 | -0.89287900 |
| H | 2.78145000  | 2.92752300  | 0.89289700  |
| H | 6.63644700  | -0.38449500 | -0.00011200 |
| H | -6.63644700 | 0.38449300  | -0.00011900 |

Optimized coordinates for Th-TDPP singlet state at RB3LYP/6-31G(d,p) level of theory and basis set.

|   |             |             |             |
|---|-------------|-------------|-------------|
| C | -0.19921400 | -1.78871400 | -0.01375400 |
| C | -0.58797100 | -0.39742700 | -0.01322400 |
| C | 0.58797000  | 0.39742500  | -0.01322200 |

## Supplementary Information

---

|   |              |             |             |
|---|--------------|-------------|-------------|
| C | 1.71020500   | -0.43596300 | -0.01320900 |
| C | -1.71020500  | 0.43596100  | -0.01320900 |
| C | 0.19921400   | 1.78871100  | -0.01375000 |
| N | -1.23457400  | 1.74657100  | -0.01339900 |
| N | 1.23457400   | -1.74657400 | -0.01340300 |
| C | -1.98550300  | 2.98903500  | -0.01318700 |
| H | -2.61028100  | 3.08209900  | 0.88008200  |
| H | -1.24366200  | 3.78929000  | -0.01321100 |
| C | 1.98550200   | -2.98903700 | -0.01319300 |
| H | 1.24366100   | -3.78929200 | -0.01321900 |
| H | 2.61063300   | -3.08214100 | -0.90617000 |
| O | 0.83030300   | 2.84416100  | -0.01461900 |
| O | -0.83030300  | -2.84416300 | -0.01462600 |
| C | -3.08632800  | 0.02987100  | -0.01198300 |
| C | -3.52380800  | -1.29046500 | -0.01355200 |
| C | -4.92402600  | -1.42111200 | -0.01832000 |
| H | -2.82719600  | -2.12308100 | -0.01704700 |
| C | -5.60415100  | -0.21489800 | -0.01980700 |
| H | -5.43073000  | -2.37938200 | -0.03320000 |
| C | 3.08632800   | -0.02987200 | -0.01198100 |
| C | 3.52380700   | 1.29046400  | -0.01354700 |
| C | 4.92402500   | 1.42111200  | -0.01831400 |
| H | 2.82719400   | 2.12307900  | -0.01704000 |
| C | 5.60415100   | 0.21489800  | -0.01980300 |
| H | 5.43072800   | 2.37938300  | -0.03319100 |
| S | 4.47362900   | -1.12047600 | -0.00540700 |
| S | -4.47362800  | 1.12047600  | -0.00540700 |
| H | 2.61028000   | -3.08210400 | 0.88007600  |
| H | -2.61063300  | 3.08214100  | -0.90616400 |
| C | -7.02901600  | 0.02365700  | -0.02773000 |
| C | -7.71220500  | 1.20879600  | -0.21613300 |
| S | -8.16472700  | -1.29291500 | 0.22836400  |
| C | -9.12517200  | 1.06554700  | -0.16113100 |
| H | -7.21219300  | 2.15263400  | -0.40212800 |
| C | -9.52009600  | -0.22469700 | 0.06761900  |
| H | -9.81932600  | 1.88743000  | -0.29144100 |
| H | -10.52428000 | -0.61548200 | 0.15289600  |
| C | 7.02901700   | -0.02365500 | -0.02772600 |
| C | 7.71220600   | -1.20879400 | -0.21613100 |
| S | 8.16472600   | 1.29291700  | 0.22837100  |
| C | 9.12517300   | -1.06554300 | -0.16112800 |
| H | 7.21219500   | -2.15263200 | -0.40212800 |
| C | 9.52009600   | 0.22470000  | 0.06762400  |
| H | 9.81932700   | -1.88742600 | -0.29143900 |
| H | 10.52428000  | 0.61548600  | 0.15290200  |

Optimized coordinates for Flu-TDPP singlet state at RB3LYP/6-31G(d,p) level of theory and basis set.

|   |             |             |             |
|---|-------------|-------------|-------------|
| C | 0.04394500  | -1.79913600 | -0.23023300 |
| C | -0.52927900 | -0.47345800 | -0.23119700 |
| C | 0.52928000  | 0.47344900  | -0.23119500 |
| C | 1.75345900  | -0.20046000 | -0.23100100 |
| C | -1.75345800 | 0.20045100  | -0.23099800 |
| C | -0.04394300 | 1.79912700  | -0.23022200 |
| N | -1.45916300 | 1.56324700  | -0.23081300 |
| N | 1.45916400  | -1.56325600 | -0.23082400 |
| C | -2.37104700 | 2.69267100  | -0.23103100 |
| H | -3.00322800 | 2.70017200  | 0.66180800  |
| H | -1.74409100 | 3.58579800  | -0.23130000 |
| C | 2.37104700  | -2.69267900 | -0.23105400 |
| H | 1.74409200  | -3.58580600 | -0.23132900 |
| H | 3.00345400  | -2.69986600 | -1.12373200 |
| O | 0.43776800  | 2.93078100  | -0.22852200 |
| O | -0.43776700 | -2.93078900 | -0.22854000 |
| C | -3.06372600 | -0.38695100 | -0.23162100 |
| C | -3.31938600 | -1.75388300 | -0.22898300 |
| C | -4.69083100 | -2.07053700 | -0.22641200 |
| H | -2.51735300 | -2.48538300 | -0.21885000 |

## Supplementary Information

---

|   |              |             |             |
|---|--------------|-------------|-------------|
| C | -5.52894600  | -0.96953700 | -0.22617800 |
| H | -5.06172200  | -3.08801400 | -0.19363800 |
| C | 3.06372600   | 0.38694200  | -0.23162300 |
| C | 3.31938500   | 1.75387600  | -0.22897800 |
| C | 4.69083000   | 2.07053100  | -0.22640700 |
| H | 2.51735100   | 2.48537400  | -0.21883900 |
| C | 5.52894500   | 0.96953100  | -0.22618000 |
| H | 5.06172000   | 3.08800700  | -0.19362800 |
| S | 4.58535500   | -0.50307500 | -0.24154700 |
| S | -4.58535300  | 0.50306900  | -0.24153800 |
| H | 3.00323100   | -2.70018900 | 0.66178300  |
| H | -3.00345500  | 2.69986500  | -1.12370700 |
| C | -7.72099700  | -2.04267400 | -0.70769400 |
| C | -6.99146100  | -0.93658300 | -0.22151800 |
| C | -7.70218800  | 0.18270200  | 0.26393700  |
| C | -9.08749500  | 0.18118500  | 0.25826400  |
| C | -9.80104100  | -0.93490600 | -0.22353100 |
| C | -9.11213900  | -2.05028500 | -0.70666700 |
| H | -7.18459200  | -2.89480100 | -1.11178300 |
| H | -7.15568000  | 1.03363900  | 0.66189300  |
| H | -9.64785500  | -2.91389500 | -1.09020800 |
| C | -10.04421100 | 1.27360300  | 0.73701500  |
| C | -11.39872300 | 0.62341000  | 0.45440100  |
| C | -12.67304700 | 1.13271200  | 0.67601200  |
| C | -13.78671100 | 0.35473300  | 0.33836600  |
| C | -13.62336000 | -0.91954000 | -0.21518100 |
| C | -12.34683800 | -1.43751300 | -0.44058800 |
| C | -11.23558400 | -0.66088000 | -0.10386800 |
| H | -12.81166800 | 2.12143100  | 1.10568800  |
| H | -14.78649900 | 0.74369300  | 0.50768000  |
| H | -14.49758800 | -1.51068800 | -0.47170400 |
| H | -12.22487500 | -2.42766000 | -0.87074700 |
| C | -9.86335400  | 2.57538400  | -0.07551100 |
| H | -8.86608300  | 2.99772900  | 0.08639100  |
| H | -9.98742600  | 2.39207000  | -1.14636800 |
| H | -10.59916100 | 3.32628800  | 0.23049500  |
| C | -9.86143700  | 1.56186700  | 2.24404000  |
| H | -9.98458300  | 0.65152700  | 2.83717700  |
| H | -8.86407800  | 1.96783900  | 2.44291700  |
| H | -10.59702400 | 2.29640600  | 2.58796500  |
| C | 13.62335800  | 0.91954400  | -0.21519900 |
| C | 13.78671200  | -0.35472200 | 0.33836300  |
| C | 12.67304900  | -1.13269800 | 0.67602000  |
| C | 11.39872300  | -0.62340000 | 0.45440700  |
| C | 11.23558200  | 0.66088300  | -0.10387800 |
| C | 12.34683500  | 1.43751300  | -0.44060900 |
| H | 14.49758500  | 1.51068900  | -0.47173100 |
| H | 14.78650000  | -0.74367900 | 0.50767900  |
| H | 12.81167100  | -2.12141200 | 1.10570900  |
| H | 12.22487000  | 2.42765500  | -0.87078000 |
| C | 10.04421300  | -1.27359000 | 0.73703300  |
| C | 9.08749500   | -0.18118000 | 0.25826900  |
| C | 7.70218800   | -0.18269800 | 0.26394400  |
| C | 6.99145900   | 0.93658000  | -0.22152200 |
| C | 7.72099200   | 2.04266700  | -0.70771200 |
| C | 9.11213500   | 2.05027900  | -0.70668800 |
| C | 9.80103900   | 0.93490700  | -0.22354000 |
| H | 7.15568200   | -1.03363000 | 0.66191200  |
| H | 7.18458500   | 2.89478800  | -1.11181000 |
| H | 9.64784900   | 2.91388500  | -1.09024000 |
| C | 9.86144300   | -1.56183100 | 2.24406300  |
| H | 9.98459000   | -0.65148300 | 2.83718600  |
| H | 8.86408500   | -1.96780200 | 2.44294900  |
| H | 10.59703200  | -2.29636500 | 2.58799700  |
| C | 9.86335500   | -2.57538300 | -0.07547300 |
| H | 8.86608500   | -2.99772700 | 0.08643800  |
| H | 9.98742500   | -2.39208600 | -1.14633400 |
| H | 10.59916300  | -3.32628200 | 0.23054200  |

## Supplementary Information

Optimized coordinates for TPAOMe-TDPP singlet state at RB3LYP/6-31G(d,p) level of theory and basis set.

|   |              |             |             |
|---|--------------|-------------|-------------|
| C | -0.08874000  | -1.66147800 | 0.76171400  |
| C | -0.56410100  | -0.41991300 | 0.19928700  |
| C | 0.56035200   | 0.36403500  | -0.17399900 |
| C | 1.73325600   | -0.33365700 | 0.12924300  |
| C | -1.73699200  | 0.27739000  | -0.10453800 |
| C | 0.08503600   | 1.60628700  | -0.73479900 |
| N | -1.34331700  | 1.49262300  | -0.66490300 |
| N | 1.33963200   | -1.54837100 | 0.69056500  |
| C | -2.17033700  | 2.58210700  | -1.14983600 |
| H | -2.79092200  | 3.00275600  | -0.35304900 |
| H | -1.47974900  | 3.34811000  | -1.50648300 |
| C | 2.16683300   | -2.63671100 | 1.17782500  |
| H | 1.47645100   | -3.40153100 | 1.53738400  |
| H | 2.78640700   | -3.06014900 | 0.38167000  |
| O | 0.64734300   | 2.59984100  | -1.19448900 |
| O | -0.65106500  | -2.65345100 | 1.22460200  |
| C | -3.08553700  | -0.16238200 | 0.11095800  |
| C | -3.44193800  | -1.38136700 | 0.67782600  |
| C | -4.83216700  | -1.57053600 | 0.78300900  |
| H | -2.69530100  | -2.09653300 | 1.00893700  |
| C | -5.59002800  | -0.51452000 | 0.30570800  |
| H | -5.27386800  | -2.45441500 | 1.22755000  |
| C | 3.08174200   | 0.10339100  | -0.09205000 |
| C | 3.43773200   | 1.32466600  | -0.65459900 |
| C | 4.82789400   | 1.51569000  | -0.75704600 |
| H | 2.69090100   | 2.04874800  | -0.96530200 |
| C | 5.58553800   | 0.45866600  | -0.28148100 |
| H | 5.27141500   | 2.42540700  | -1.14402100 |
| S | 4.53617300   | -0.81638200 | 0.29797200  |
| S | -4.53983900  | 0.74681400  | -0.30288300 |
| C | -7.04309400  | -0.38199300 | 0.26120600  |
| C | -7.68106300  | 0.86754200  | 0.14146000  |
| C | -7.87243400  | -1.51915800 | 0.33952100  |
| C | -9.06306400  | 0.98051300  | 0.09675700  |
| H | -7.08409000  | 1.77342800  | 0.08737000  |
| C | -9.25457400  | -1.41564200 | 0.31230900  |
| H | -7.42486400  | -2.50482700 | 0.41648700  |
| C | -9.88355000  | -0.16067900 | 0.18617900  |
| H | -9.51759500  | 1.95934800  | -0.00429900 |
| H | -9.86033100  | -2.31181400 | 0.38318800  |
| C | 7.03803200   | 0.32748100  | -0.23674300 |
| C | 7.68681300   | -0.55748900 | 0.64573500  |
| C | 7.85578000   | 1.09822100  | -1.08794500 |
| C | 9.06924800   | -0.66495500 | 0.68582200  |
| H | 7.09867100   | -1.14982300 | 1.34099100  |
| C | 9.23771700   | 0.99559900  | -1.05843900 |
| H | 7.39662000   | 1.76420600  | -1.81164800 |
| C | 9.87819300   | 0.11094800  | -0.16724200 |
| H | 9.53413900   | -1.34288500 | 1.39241400  |
| H | 9.83432700   | 1.59015700  | -1.74087500 |
| N | -11.28610100 | -0.05238000 | 0.15154400  |
| N | 11.28029400  | 0.00416900  | -0.13498100 |
| C | 11.91009600  | -1.22228900 | 0.23307900  |
| C | 12.94670100  | -1.23774400 | 1.17099600  |
| C | 11.52008000  | -2.43697100 | -0.35779800 |
| C | 13.59129600  | -2.42797800 | 1.51428000  |
| H | 13.25917800  | -0.30724000 | 1.63347800  |
| C | 12.14050500  | -3.62655400 | -0.00576300 |
| H | 10.72333900  | -2.44033600 | -1.09438300 |
| C | 13.18554300  | -3.63316500 | 0.93068600  |
| H | 14.39389500  | -2.40122700 | 2.24144600  |
| H | 11.84339100  | -4.56715100 | -0.45752300 |
| C | 12.10494400  | 1.12654200  | -0.44618700 |
| C | 11.87185200  | 2.37633900  | 0.13670200  |
| C | 13.18390400  | 0.99089000  | -1.33622500 |
| C | 12.67744500  | 3.47547800  | -0.16809000 |
| H | 11.04750800  | 2.49460900  | 0.83241100  |
| C | 14.00234100  | 2.07246000  | -1.62704800 |

## Supplementary Information

---

|   |              |             |             |
|---|--------------|-------------|-------------|
| H | 13.37701900  | 0.02674100  | -1.79491700 |
| C | 13.75362100  | 3.32704000  | -1.05028100 |
| H | 12.46448300  | 4.42964600  | 0.29872400  |
| H | 14.83721900  | 1.97379300  | -2.31286000 |
| C | -12.08539200 | -1.09705800 | -0.40179000 |
| C | -13.21021900 | -1.57531600 | 0.29161700  |
| C | -11.78126300 | -1.65453200 | -1.64793400 |
| C | -14.00382800 | -2.57570100 | -0.25033200 |
| H | -13.45875200 | -1.15124300 | 1.25892400  |
| C | -12.56195400 | -2.67755600 | -2.19005900 |
| H | -10.92060900 | -1.28994100 | -2.19921100 |
| C | -13.68407800 | -3.14093200 | -1.49400600 |
| H | -14.87385200 | -2.94847300 | 0.27995700  |
| H | -12.29348700 | -3.08901200 | -3.15562500 |
| C | -11.93920600 | 1.11624200  | 0.64545700  |
| C | -12.93055700 | 1.75169100  | -0.10813500 |
| C | -11.61837300 | 1.63867900  | 1.91072000  |
| C | -13.59788500 | 2.87700000  | 0.38022900  |
| H | -13.18959100 | 1.35818700  | -1.08559300 |
| C | -12.26093800 | 2.76919300  | 2.39337700  |
| H | -10.85770200 | 1.15134700  | 2.51178100  |
| C | -13.26052300 | 3.39698000  | 1.63459900  |
| H | -14.36415700 | 3.34054600  | -0.22939200 |
| H | -12.01698500 | 3.17756900  | 3.36847100  |
| O | 14.61079100  | 4.32734100  | -1.41092100 |
| O | 13.73613400  | -4.85421900 | 1.19740500  |
| O | -13.83860300 | 4.49449500  | 2.20619300  |
| O | -14.52236500 | -4.12615300 | -1.93237400 |
| C | 14.40489000  | 5.61737400  | -0.85776300 |
| H | 15.18548900  | 6.25347600  | -1.27733100 |
| H | 13.42278500  | 6.02405700  | -1.13146700 |
| H | 14.49618300  | 5.60927000  | 0.23607500  |
| C | 14.79617300  | -4.91960100 | 2.13784400  |
| H | 14.47900700  | -4.57691100 | 3.13123500  |
| H | 15.08291500  | -5.97048200 | 2.19639800  |
| H | 15.66206400  | -4.32723900 | 1.81494200  |
| C | -14.85557800 | 5.16870500  | 1.48267400  |
| H | -15.17445700 | 5.99941000  | 2.11375300  |
| H | -14.48155400 | 5.56365100  | 0.52925900  |
| H | -15.71509700 | 4.51483700  | 1.28612400  |
| C | -14.24480900 | -4.73338700 | -3.18408300 |
| H | -15.02220700 | -5.48380600 | -3.33418800 |
| H | -14.28293400 | -4.00612500 | -4.00538200 |
| H | -13.26357600 | -5.22533600 | -3.18759500 |
| H | -2.81079900  | 2.26473100  | -1.97817700 |
| H | 2.80828100   | -2.31686300 | 2.00438800  |

Optimized coordinates for TPAOMe-TTDP singlet state at RB3LYP/6-31G(d,p) level of theory and basis set.

|   |             |             |             |
|---|-------------|-------------|-------------|
| C | -0.43666900 | -1.62359500 | 0.64762100  |
| C | -0.63142500 | -0.25777100 | 0.22091400  |
| C | 0.63790300  | 0.29998000  | -0.07599400 |
| C | 1.63462800  | -0.65993400 | 0.14294000  |
| C | -1.62903900 | 0.69457900  | -0.01760600 |
| C | 0.44018400  | 1.66006400  | -0.51708500 |
| N | -0.97809200 | 1.85887000  | -0.43808700 |
| N | 0.98294200  | -1.82142000 | 0.56542800  |
| C | -1.51894600 | 3.19326400  | -0.69948600 |
| H | -0.77357262 | 3.79253078  | -1.17927537 |
| H | -2.37554886 | 3.11260038  | -1.33558735 |
| C | 1.52298300  | -3.14268200 | 0.88030100  |
| H | 2.40983525  | -3.03445365 | 1.46909613  |
| H | 0.79610495  | -3.70334472 | 1.43003331  |
| O | 1.21172300  | 2.53817000  | -0.90734300 |
| O | -1.20408300 | -2.50658200 | 1.02976400  |
| C | -3.04471800 | 0.48249600  | 0.09160100  |
| C | -3.63513700 | -0.66854900 | 0.60680800  |
| C | -5.03876300 | -0.66102500 | 0.55044900  |
| H | -3.04151300 | -1.49072500 | 0.99297600  |



## Supplementary Information

---

|   |              |             |             |
|---|--------------|-------------|-------------|
| C | -5.57704300  | 0.48471700  | -0.01553400 |
| H | -5.65139700  | -1.47869100 | 0.91279000  |
| C | 3.04911100   | -0.46206300 | -0.00088100 |
| C | 3.63860200   | 0.70222000  | -0.48708800 |
| C | 5.04273000   | 0.66685600  | -0.49822300 |
| H | 3.04367400   | 1.54831800  | -0.81578700 |
| C | 5.58355600   | -0.51586500 | -0.01724900 |
| H | 5.65424900   | 1.48620400  | -0.85860800 |
| S | 4.30480300   | -1.61219400 | 0.46257400  |
| S | -4.29632500  | 1.58449500  | -0.48295100 |
| C | -10.91094700 | 0.49388400  | -0.20823300 |
| C | -11.89484700 | 1.49916900  | -0.28550600 |
| C | -11.35984300 | -0.82705500 | -0.01864100 |
| C | -13.24705900 | 1.20358400  | -0.19641900 |
| H | -11.59475100 | 2.53463500  | -0.41146000 |
| C | -12.70904300 | -1.13085100 | 0.09116900  |
| H | -10.63845300 | -1.63716100 | 0.03943000  |
| C | -13.68616300 | -0.12096400 | -0.00175700 |
| H | -13.97570500 | 2.00282000  | -0.26996200 |
| H | -13.01589000 | -2.15893900 | 0.24561800  |
| C | 10.91793000  | -0.56735200 | 0.07486500  |
| C | 11.87985500  | -1.29752500 | 0.80022900  |
| C | 11.38617100  | 0.49418100  | -0.72280800 |
| C | 13.23046300  | -0.99002100 | 0.73217700  |
| H | 11.55827900  | -2.09829300 | 1.45892100  |
| C | 12.73524700  | 0.80776800  | -0.80041600 |
| H | 10.68310500  | 1.06529800  | -1.32261600 |
| C | 13.69016800  | 0.07140200  | -0.07261300 |
| H | 13.94060800  | -1.56110600 | 1.31933900  |
| H | 13.06118100  | 1.62020500  | -1.43977400 |
| N | -15.05693100 | -0.42478000 | 0.10048100  |
| N | 15.05973300  | 0.38639400  | -0.14571300 |
| C | 16.05019200  | -0.62690800 | 0.02080400  |
| C | 17.13638200  | -0.42810200 | 0.87834300  |
| C | 15.96935200  | -1.83633300 | -0.69161400 |
| C | 18.12748500  | -1.40085700 | 1.02496900  |
| H | 17.21257400  | 0.50137900  | 1.43297900  |
| C | 16.93808500  | -2.81664700 | -0.53454800 |
| H | 15.13759900  | -2.00192100 | -1.36848000 |
| C | 18.02935900  | -2.60670700 | 0.32216300  |
| H | 18.95730000  | -1.21008100 | 1.69482000  |
| H | 16.88065600  | -3.75216600 | -1.08102200 |
| C | 15.48894300  | 1.72960300  | -0.36490100 |
| C | 14.96265600  | 2.78654700  | 0.38480500  |
| C | 16.46732100  | 2.01432500  | -1.33262400 |
| C | 15.38105900  | 4.10136200  | 0.16994400  |
| H | 14.21204300  | 2.58169600  | 1.14120900  |
| C | 16.90461500  | 3.31490100  | -1.53653800 |
| H | 16.88506400  | 1.20404800  | -1.92103700 |
| C | 16.36142900  | 4.37221000  | -0.79128400 |
| H | 14.94773100  | 4.89551900  | 0.76595300  |
| H | 17.66015600  | 3.54069800  | -2.28170900 |
| C | -15.56016100 | -1.68448900 | -0.34244000 |
| C | -16.42721100 | -2.43068200 | 0.47378300  |
| C | -15.21925400 | -2.19611100 | -1.59870700 |
| C | -16.93731400 | -3.64584900 | 0.04078200  |
| H | -16.70091500 | -2.04572500 | 1.45060500  |
| C | -15.71025800 | -3.42926900 | -2.03261400 |
| H | -14.55675300 | -1.62800200 | -2.24361700 |
| C | -16.57916200 | -4.16003100 | -1.21446000 |
| H | -17.60766600 | -4.22591900 | 0.66628900  |
| H | -15.42073000 | -3.79668500 | -3.00980400 |
| C | -15.97715300 | 0.52724100  | 0.63194600  |
| C | -17.17533600 | 0.80772500  | -0.03163500 |
| C | -15.71191800 | 1.18466400  | 1.84615300  |
| C | -18.09758600 | 1.71384800  | 0.49609400  |
| H | -17.39397600 | 0.30612500  | -0.96863300 |
| C | -16.61263800 | 2.10284300  | 2.36555000  |
| H | -14.79070900 | 0.97092700  | 2.37821100  |

## Supplementary Information

---

|   |              |             |             |
|---|--------------|-------------|-------------|
| C | -17.81677200 | 2.37314400  | 1.69778200  |
| H | -19.01801700 | 1.90249100  | -0.04327300 |
| H | -16.41300500 | 2.61383900  | 3.30157800  |
| O | 16.85197500  | 5.61443600  | -1.07725400 |
| O | 18.93213600  | -3.62914800 | 0.39567600  |
| O | -18.63843600 | 3.28327300  | 2.29977900  |
| O | -17.12699100 | -5.36814100 | -1.54020900 |
| C | 16.33586100  | 6.72073000  | -0.35454000 |
| H | 16.85270800  | 7.60054100  | -0.74030200 |
| H | 15.25599400  | 6.83955100  | -0.51133100 |
| H | 16.53298900  | 6.63028300  | 0.72150100  |
| C | 20.05541900  | -3.47004100 | 1.24723700  |
| H | 19.75514000  | -3.33922600 | 2.29490800  |
| H | 20.63729300  | -4.38802300 | 1.15362700  |
| H | 20.67660800  | -2.61721200 | 0.94436200  |
| C | -19.86997600 | 3.59365700  | 1.66806500  |
| H | -20.36135100 | 4.32696600  | 2.30904000  |
| H | -19.71685300 | 4.03052500  | 0.67275900  |
| H | -20.51254800 | 2.70858500  | 1.57478000  |
| C | -16.79680800 | -5.93564600 | -2.79769800 |
| H | -17.32941600 | -6.88630300 | -2.84873700 |
| H | -17.12068400 | -5.29637800 | -3.62919000 |
| H | -15.71877900 | -6.12126800 | -2.88854500 |
| C | 6.96689900   | -0.89041500 | 0.11829300  |
| C | 7.51132700   | -2.10801500 | 0.48298400  |
| S | 8.25102900   | 0.27109200  | -0.18584500 |
| C | 8.92463200   | -2.11858800 | 0.50422100  |
| H | 6.90501000   | -2.97833200 | 0.70907800  |
| C | 9.50146500   | -0.91196000 | 0.15786200  |
| H | 9.50866800   | -3.00188000 | 0.73398000  |
| C | -6.95870400  | 0.82585700  | -0.23200400 |
| C | -7.49796200  | 1.94824000  | -0.83294400 |
| S | -8.24787700  | -0.24818500 | 0.29244900  |
| C | -8.91038700  | 1.94578600  | -0.88469400 |
| H | -6.88827900  | 2.74745000  | -1.23996800 |
| C | -9.49302200  | 0.82485800  | -0.32547200 |
| H | -9.48713000  | 2.73630800  | -1.34992000 |
| H | -1.80318226  | 3.65035317  | 0.22527302  |
| H | 1.75833606   | -3.65745363 | -0.02772934 |

Optimized coordinates for NTT singlet state at RB3LYP/6-31G(d,p) level of theory and basis set.

|   |             |             |             |
|---|-------------|-------------|-------------|
| C | -2.18316300 | -1.36681900 | 0.00000600  |
| C | -0.76586200 | -1.68984100 | 0.00000700  |
| C | 0.24035500  | -0.65926100 | 0.00000200  |
| C | -0.24035500 | 0.65926100  | -0.00000300 |
| C | -1.63107000 | 0.96601500  | -0.00000400 |
| C | -2.63239300 | 0.01362100  | 0.00000100  |
| C | 1.63107000  | -0.96601500 | 0.00000300  |
| C | 0.76586200  | 1.68984100  | -0.00000700 |
| C | 2.18316300  | 1.36681900  | -0.00000600 |
| C | 2.63239300  | -0.01362100 | -0.00000100 |
| H | 1.88831300  | -2.02001200 | 0.00000900  |
| H | -1.88831300 | 2.02001200  | -0.00001000 |
| N | 0.50994400  | 2.99671300  | -0.00001300 |
| N | 2.96125100  | 2.45054100  | -0.00001100 |
| S | 1.96606600  | 3.76322900  | -0.00001600 |
| N | -2.96125100 | -2.45054100 | 0.00001100  |
| N | -0.50994400 | -2.99671300 | 0.00001200  |
| S | -1.96606600 | -3.76322900 | 0.00001600  |
| C | 4.04641200  | -0.37266400 | -0.00000200 |
| C | 5.15954200  | 0.44144100  | 0.00001700  |
| S | 4.54562000  | -2.06338000 | -0.00002800 |
| C | 6.40421500  | -0.25988800 | 0.00001200  |
| H | 5.08044700  | 1.51998100  | 0.00003400  |
| C | 6.21894000  | -1.61752000 | -0.00001200 |
| C | -4.04641200 | 0.37266400  | 0.00000200  |
| C | -5.15954200 | -0.44144100 | -0.00002400 |

## Supplementary Information

|   |             |             |             |
|---|-------------|-------------|-------------|
| S | -4.54562000 | 2.06338000  | 0.00004000  |
| C | -6.40421500 | 0.25988800  | -0.00001700 |
| H | -5.08044700 | -1.51998100 | -0.00004800 |
| C | -6.21894000 | 1.61752000  | 0.00001700  |
| C | 7.74624500  | 0.42105800  | 0.00003100  |
| H | 7.86667000  | 1.06074100  | -0.88157500 |
| H | 7.86666100  | 1.06070900  | 0.88166000  |
| H | 8.56189200  | -0.30661900 | 0.00002200  |
| C | -7.74624500 | -0.42105800 | -0.00004200 |
| H | -7.86665900 | -1.06070400 | -0.88167600 |
| H | -7.86667200 | -1.06074600 | 0.88155900  |
| H | -8.56189200 | 0.30661900  | -0.00003100 |
| H | 6.97672400  | -2.38951700 | -0.00002100 |
| H | -6.97672400 | 2.38951700  | 0.00003000  |

Optimized coordinates for 2N-NTT singlet state at RB3LYP/6-31G(d,p) level of theory and basis set.

|   |             |             |             |
|---|-------------|-------------|-------------|
| C | -1.56947500 | 2.04101000  | -0.08888800 |
| C | -0.13022000 | 1.85131100  | -0.01385100 |
| C | 0.45431500  | 0.53500200  | 0.02123000  |
| C | -0.45431500 | -0.53500500 | -0.02124100 |
| C | -1.86207500 | -0.33976200 | -0.09588300 |
| C | -2.46937900 | 0.90238300  | -0.12978400 |
| C | 1.86207500  | 0.33975900  | 0.09587200  |
| C | 0.13022000  | -1.85131500 | 0.01383900  |
| C | 1.56947500  | -2.04101300 | 0.08887500  |
| C | 2.46937900  | -0.90238700 | 0.12977200  |
| H | 2.46960000  | 1.23796900  | 0.13095200  |
| H | -2.46960000 | -1.23797200 | -0.13096500 |
| N | -0.56285300 | -2.98786100 | -0.01871600 |
| N | 1.92245500  | -3.32715700 | 0.11060500  |
| S | 0.53474600  | -4.21274100 | 0.04177500  |
| N | -1.92245500 | 3.32715300  | -0.11061800 |
| N | 0.56285300  | 2.98785700  | 0.01870300  |
| S | -0.53474700 | 4.21273800  | -0.04178800 |
| C | 3.91600400  | -1.05660000 | 0.19803200  |
| C | 4.67258300  | -2.20078600 | 0.34653400  |
| S | 4.97672200  | 0.33985500  | 0.09440300  |
| C | 6.07939700  | -1.98837900 | 0.38834900  |
| H | 4.22014000  | -3.17877700 | 0.43838200  |
| C | 6.41415900  | -0.64988600 | 0.26548500  |
| C | -3.91600400 | 1.05659700  | -0.19804300 |
| C | -4.67258200 | 2.20078300  | -0.34655500 |
| S | -4.97672300 | -0.33985500 | -0.09439900 |
| C | -6.07939600 | 1.98837600  | -0.38836900 |
| H | -4.22013800 | 3.17877300  | -0.43841200 |
| C | -6.41415900 | 0.64988500  | -0.26548900 |
| C | 7.04943800  | -3.12284900 | 0.59599500  |
| H | 6.60376400  | -3.89181100 | 1.23417700  |
| H | 7.31815500  | -3.60743400 | -0.35095300 |
| H | 7.97534800  | -2.78259300 | 1.06570300  |
| C | -7.04943600 | 3.12284500  | -0.59602500 |
| H | -7.31815000 | 3.60744100  | 0.35091700  |
| H | -6.60376300 | 3.89179900  | -1.23421700 |
| H | -7.97534600 | 2.78258400  | -1.06572900 |
| C | 8.81822700  | -0.57988100 | -0.38306100 |
| C | 10.09687700 | 0.03336200  | -0.38642000 |
| C | 7.73389600  | -0.00432200 | 0.26396200  |
| C | 11.21195800 | -0.55191900 | -1.04640600 |
| C | 10.27231400 | 1.28682000  | 0.28414300  |
| C | 7.92453400  | 1.24892800  | 0.92391800  |
| C | 12.44077900 | 0.06790000  | -1.03748800 |
| H | 11.07757400 | -1.50083400 | -1.55906200 |
| C | 11.55245700 | 1.89943100  | 0.27620100  |
| C | 9.14889500  | 1.86909900  | 0.93089100  |
| H | 7.08624600  | 1.70164000  | 1.44417800  |
| C | 12.61382100 | 1.30471800  | -0.36895900 |
| H | 13.28474300 | -0.39040200 | -1.54450900 |
| H | 11.68114400 | 2.84933100  | 0.78851600  |

## Supplementary Information

---

|   |              |             |             |
|---|--------------|-------------|-------------|
| H | 9.27416300   | 2.81855800  | 1.44476200  |
| H | 13.58866900  | 1.78319000  | -0.36907400 |
| C | -8.81822600  | 0.57989000  | 0.38306200  |
| C | -10.09687600 | -0.03335300 | 0.38643100  |
| C | -7.73389700  | 0.00432200  | -0.26395500 |
| C | -11.21195600 | 0.55193700  | 1.04641100  |
| C | -10.27231500 | -1.28682000 | -0.28411500 |
| C | -7.92453600  | -1.24893600 | -0.92389500 |
| C | -12.44077700 | -0.06788200 | 1.03750400  |
| H | -11.07757200 | 1.50085900  | 1.55905400  |
| C | -11.55245700 | -1.89943100 | -0.27616200 |
| C | -9.14889700  | -1.86910800 | -0.93085700 |
| H | -7.08624900  | -1.70165500 | -1.44415000 |
| C | -12.61382000 | -1.30471000 | 0.36899300  |
| H | -13.28474100 | 0.39042600  | 1.54452100  |
| H | -11.68114500 | -2.84933900 | -0.78846300 |
| H | -9.27416600  | -2.81857400 | -1.44471500 |
| H | -13.58866800 | -1.78318200 | 0.36911600  |
| H | -8.69103000  | 1.50841600  | 0.93000600  |
| H | 8.69103100   | -1.50839900 | -0.93001800 |

Optimized coordinates for Flu-NTT singlet state at RB3LYP/6-31G(d,p) level of theory and basis set.

|   |             |             |             |
|---|-------------|-------------|-------------|
| C | -1.49843100 | -2.08600200 | -0.20080500 |
| C | -0.06837700 | -1.85284500 | -0.08266400 |
| C | 0.47126100  | -0.52045200 | 0.01379300  |
| C | -0.47125800 | 0.52048700  | -0.01383200 |
| C | -1.86947600 | 0.28282600  | -0.13123800 |
| C | -2.43445500 | -0.97633200 | -0.22403100 |
| C | 1.86948000  | -0.28279100 | 0.13119800  |
| C | 0.06838100  | 1.85288000  | 0.08262100  |
| C | 1.49843600  | 2.08603600  | 0.20075900  |
| C | 2.43446000  | 0.97636600  | 0.22398800  |
| H | 2.50554100  | -1.16149100 | 0.15135400  |
| H | -2.50553800 | 1.16152500  | -0.15139900 |
| N | -0.66092200 | 2.96694300  | 0.07269400  |
| N | 1.80814200  | 3.38122400  | 0.27669600  |
| S | 0.39386200  | 4.22363600  | 0.20412700  |
| N | -1.80813800 | -3.38118900 | -0.27674700 |
| N | 0.66092700  | -2.96690800 | -0.07274000 |
| S | -0.39385800 | -4.22360100 | -0.20417900 |
| C | 3.87288800  | 1.17457200  | 0.33295900  |
| C | 4.58698700  | 2.33430100  | 0.55446400  |
| S | 4.98326800  | -0.17911500 | 0.18610400  |
| C | 5.99874600  | 2.16582700  | 0.62106400  |
| H | 4.09975900  | 3.29140000  | 0.68209400  |
| C | 6.38177200  | 0.84635500  | 0.44419800  |
| C | -3.87288300 | -1.17453800 | -0.33300200 |
| C | -4.58697600 | -2.33425700 | -0.55457800 |
| S | -4.98326800 | 0.17913300  | -0.18605600 |
| C | -5.99873600 | -2.16578500 | -0.62116500 |
| H | -4.09974400 | -3.29134600 | -0.68227000 |
| C | -6.38176800 | -0.84632700 | -0.44421200 |
| C | 6.92472400  | 3.32012300  | 0.90819600  |
| H | 7.18613600  | 3.86966700  | -0.00480700 |
| H | 6.44390400  | 4.03367200  | 1.58425900  |
| H | 7.85649300  | 2.98713100  | 1.37118200  |
| C | -6.92470800 | -3.32006800 | -0.90837200 |
| H | -6.44387100 | -4.03358900 | -1.58445300 |
| H | -7.18614600 | -3.86965200 | 0.00460100  |
| H | -7.85646400 | -2.98705400 | -1.37136800 |
| C | 13.74987500 | -2.52625400 | 0.43987000  |
| C | 14.40084900 | -1.50910900 | -0.26589200 |
| C | 13.69653700 | -0.37883700 | -0.69721500 |
| C | 12.33900000 | -0.27807200 | -0.41522700 |
| C | 11.68423700 | -1.30388000 | 0.29620800  |
| C | 12.38669000 | -2.43187100 | 0.72627800  |
| H | 14.31009100 | -3.39706600 | 0.76771900  |
| H | 15.46176200 | -1.59718300 | -0.48109400 |

## Supplementary Information

---

|   |              |             |             |
|---|--------------|-------------|-------------|
| H | 14.21206900  | 0.40560100  | -1.24533100 |
| H | 11.88543400  | -3.22461100 | 1.27460400  |
| C | 11.36557400  | 0.84417700  | -0.77643200 |
| C | 10.06646900  | 0.31574600  | -0.16673900 |
| C | 8.80826200   | 0.89916800  | -0.17515000 |
| C | 7.72222400   | 0.24452300  | 0.44543000  |
| C | 7.94609300   | -1.00964800 | 1.05164900  |
| C | 9.20625600   | -1.60135000 | 1.05454200  |
| C | 10.27298800  | -0.93543800 | 0.44710900  |
| H | 8.64219200   | 1.84423900  | -0.68192600 |
| H | 7.11867100   | -1.51218700 | 1.54294600  |
| H | 9.34992100   | -2.56587900 | 1.53317300  |
| C | -7.94609300  | 1.00972200  | -1.05151500 |
| C | -7.72222300  | -0.24450100 | -0.44540400 |
| C | -8.80826300  | -0.89920400 | 0.17511100  |
| C | -10.06647300 | -0.31578700 | 0.16674000  |
| C | -10.27299200 | 0.93545100  | -0.44699800 |
| C | -9.20625800  | 1.60142000  | -1.05436400 |
| H | -7.11867000  | 1.51230700  | -1.54276200 |
| H | -8.64219600  | -1.84431900 | 0.68180700  |
| H | -9.34992200  | 2.56599100  | -1.53291100 |
| C | -11.36558100 | -0.84427800 | 0.77637400  |
| C | -12.33900800 | 0.27800000  | 0.41526300  |
| C | -13.69654800 | 0.37873600  | 0.69724900  |
| C | -14.40086000 | 1.50904400  | 0.26602400  |
| C | -13.74988400 | 2.52625500  | -0.43964100 |
| C | -12.38669600 | 2.43190300  | -0.72604700 |
| C | -11.68424300 | 1.30387500  | -0.29607400 |
| H | -14.21208100 | -0.40575400 | 1.24529000  |
| H | -15.46177500 | 1.59709600  | 0.48122600  |
| H | -14.31010000 | 3.39709600  | -0.76741500 |
| H | -11.88543800 | 3.22469300  | -1.27429700 |
| C | -11.24270400 | -1.01163700 | 2.30752500  |
| H | -10.49609000 | -1.77335200 | 2.55562800  |
| H | -10.94477800 | -0.07337100 | 2.78350400  |
| H | -12.19866600 | -1.32594600 | 2.73930600  |
| C | -11.78574000 | -2.18384700 | 0.13119400  |
| H | -11.87806100 | -2.08648800 | -0.95412000 |
| H | -11.04751200 | -2.96428900 | 0.34388200  |
| H | -12.75025700 | -2.51797400 | 0.52758800  |
| C | 11.78574300  | 2.18380400  | -0.13137900 |
| H | 11.04751600  | 2.96422900  | -0.34413300 |
| H | 11.87807300  | 2.08654400  | 0.95394300  |
| H | 12.75025800  | 2.51789000  | -0.52781300 |
| C | 11.24268300  | 1.01139500  | -2.30759700 |
| H | 10.94475000  | 0.07308600  | -2.78348700 |
| H | 10.49607100  | 1.77309000  | -2.55576400 |
| H | 12.19864300  | 1.32566100  | -2.73941600 |

Optimized coordinates for NTC singlet state at RB3LYP/6-31G(d,p) level of theory and basis set.

|   |             |             |             |
|---|-------------|-------------|-------------|
| C | -1.92938800 | -1.70804600 | 0.00000000  |
| C | -0.47771300 | -1.79327500 | 0.00000000  |
| C | 0.34678800  | -0.61135400 | -0.00000200 |
| C | -0.34678800 | 0.61135300  | -0.00000400 |
| C | -1.76575700 | 0.68605000  | -0.00000600 |
| C | -2.60138800 | -0.41931700 | -0.00000200 |
| C | 1.76575700  | -0.68605100 | -0.00000200 |
| C | 0.47771300  | 1.79327400  | -0.00000600 |
| C | 1.92938800  | 1.70804600  | -0.00000500 |
| C | 2.60138700  | 0.41931600  | -0.00000200 |
| H | 2.19083700  | -1.68430300 | -0.00000300 |
| H | -2.19083700 | 1.68430200  | -0.00001200 |
| N | 0.01075800  | 3.04000300  | -0.00000900 |
| N | 2.51809700  | 2.90470700  | -0.00000600 |
| S | 1.32030800  | 4.03716900  | -0.00001000 |
| N | -2.51809700 | -2.90470700 | 0.00000100  |
| N | -0.01075900 | -3.04000400 | 0.00000100  |
| S | -1.32030800 | -4.03717000 | 0.00000300  |

## Supplementary Information

---

|   |              |             |             |
|---|--------------|-------------|-------------|
| C | 7.74101100   | 1.38384000  | -0.00004100 |
| C | 8.57317600   | 0.10164600  | -0.00001000 |
| C | 7.75501300   | -1.01674800 | 0.00002300  |
| C | 6.38017500   | -0.59346500 | 0.00001800  |
| C | 6.33119200   | 0.79218900  | -0.00002000 |
| C | 4.04832300   | 0.30149700  | 0.00000200  |
| C | 5.01647600   | 1.29875800  | -0.00002900 |
| H | 4.74661700   | 2.34566900  | -0.00005700 |
| C | 10.15722500  | -1.58800800 | 0.00002900  |
| S | 4.80982100   | -1.30848100 | 0.00004800  |
| H | 11.09651700  | -2.12300400 | 0.00004100  |
| C | 8.00039200   | 2.22773500  | -1.26768100 |
| H | 7.34204800   | 3.10229800  | -1.28768000 |
| H | 9.03570000   | 2.58407500  | -1.28750100 |
| H | 7.82105000   | 1.64224300  | -2.17327000 |
| C | 8.00040100   | 2.22780200  | 1.26755200  |
| H | 7.34205700   | 3.10236600  | 1.28751100  |
| H | 7.82106600   | 1.64235700  | 2.17317400  |
| H | 9.03570900   | 2.58414300  | 1.28734500  |
| S | 8.66074100   | -2.49226900 | 0.00005700  |
| C | 9.95309700   | -0.22972900 | -0.00000500 |
| H | 10.76735600  | 0.48614300  | -0.00002700 |
| C | -7.74101100  | -1.38384000 | -0.00005000 |
| C | -8.57317600  | -0.10164500 | -0.00001200 |
| C | -7.75501300  | 1.01674900  | 0.00002700  |
| C | -6.38017500  | 0.59346500  | 0.00001900  |
| C | -6.33119300  | -0.79218900 | -0.00002700 |
| C | -4.04832300  | -0.30149800 | 0.00000000  |
| C | -5.01647600  | -1.29875800 | -0.00003900 |
| H | -4.74661800  | -2.34567000 | -0.00007300 |
| C | -10.15722400 | 1.58800900  | 0.00003600  |
| S | -4.80982000  | 1.30848000  | 0.00005200  |
| H | -11.09651600 | 2.12300600  | 0.00005000  |
| C | -8.00039400  | -2.22772700 | -1.26769400 |
| H | -7.34205000  | -3.10229100 | -1.28769900 |
| H | -9.03570100  | -2.58406700 | -1.28751500 |
| H | -7.82105200  | -1.64223000 | -2.17328100 |
| C | -8.00040100  | -2.22780800 | 1.26753800  |
| H | -7.34205600  | -3.10237200 | 1.28749200  |
| H | -7.82106600  | -1.64236800 | 2.17316300  |
| H | -9.03570900  | -2.58415000 | 1.28733000  |
| S | -8.66074000  | 2.49227000  | 0.00007000  |
| C | -9.95309700  | 0.22973000  | -0.00000500 |
| H | -10.76735600 | -0.48614100 | -0.00003000 |

Optimized coordinates for 2N-NTC singlet state at RB3LYP/6-31G(d,p) level of theory and basis set.

|   |             |             |             |
|---|-------------|-------------|-------------|
| C | -1.53925900 | -2.06386500 | -0.11152700 |
| C | -0.10095400 | -1.84961700 | -0.11768900 |
| C | 0.46454900  | -0.52624600 | -0.04031400 |
| C | -0.46454800 | 0.52624700  | 0.04031300  |
| C | -1.86809600 | 0.30859300  | 0.04579800  |
| C | -2.46036600 | -0.94266000 | -0.02648500 |
| C | 1.86809600  | -0.30859100 | -0.04579900 |
| C | 0.10095500  | 1.84961800  | 0.11768700  |
| C | 1.53925900  | 2.06386600  | 0.11152500  |
| C | 2.46036600  | 0.94266100  | 0.02648200  |
| H | 2.48832200  | -1.19639400 | -0.11168400 |
| H | -2.48832200 | 1.19639500  | 0.11168200  |
| N | -0.61092000 | 2.97152200  | 0.19982000  |
| N | 1.87085200  | 3.35314300  | 0.18997300  |
| S | 0.46690200  | 4.21393500  | 0.26492800  |
| N | -1.87085200 | -3.35314200 | -0.18997500 |
| N | 0.61092100  | -2.97152100 | -0.19982000 |
| S | -0.46690100 | -4.21393400 | -0.26493000 |
| C | 7.29150300  | 2.93950600  | 0.08663300  |
| C | 8.36770900  | 1.85745800  | -0.00023400 |
| C | 7.79426900  | 0.59614400  | -0.07064100 |
| C | 6.36561000  | 0.72740100  | -0.04190700 |

## Supplementary Information

---

|   |              |             |             |
|---|--------------|-------------|-------------|
| C | 6.03311700   | 2.07229300  | 0.04874900  |
| C | 3.89986300   | 1.12350700  | 0.01785200  |
| C | 4.64397700   | 2.29676300  | 0.08256400  |
| H | 4.16518200   | 3.26362800  | 0.15154600  |
| C | 10.28807600  | 0.53320800  | -0.10015000 |
| S | 4.97431200   | -0.29316200 | -0.08785700 |
| C | 7.35443500   | 3.89877700  | -1.12256700 |
| H | 6.53102100   | 4.61923100  | -1.08369900 |
| H | 8.29467100   | 4.46015400  | -1.11959900 |
| H | 7.28535400   | 3.34895400  | -2.06489900 |
| C | 7.39166300   | 3.73442700  | 1.40736400  |
| H | 6.56901400   | 4.45251700  | 1.48596800  |
| H | 7.34882000   | 3.06719100  | 2.27222200  |
| H | 8.33265700   | 4.29290800  | 1.44990300  |
| S | 8.98022900   | -0.65877100 | -0.16956900 |
| C | 9.77880400   | 1.81936600  | -0.01884100 |
| H | 10.41834500  | 2.69135700  | 0.05467400  |
| C | -7.29150300  | -2.93950500 | -0.08665500 |
| C | -8.36770900  | -1.85745800 | 0.00022100  |
| C | -7.79426900  | -0.59614500 | 0.07064000  |
| C | -6.36561000  | -0.72740100 | 0.04190600  |
| C | -6.03311700  | -2.07229200 | -0.04876200 |
| C | -3.89986300  | -1.12350600 | -0.01785500 |
| C | -4.64397600  | -2.29676200 | -0.08257800 |
| H | -4.16518100  | -3.26362600 | -0.15156900 |
| C | -10.28807600 | -0.53320900 | 0.10014800  |
| S | -4.97431300  | 0.29316200  | 0.08786800  |
| C | -7.39166200  | -3.73441400 | -1.40739400 |
| H | -6.56901200  | -4.45250300 | -1.48600500 |
| H | -8.33265500  | -4.29289400 | -1.44994000 |
| H | -7.34881700  | -3.06717000 | -2.27224600 |
| C | -7.35443600  | -3.89878700 | 1.12253500  |
| H | -6.53102200  | -4.61924100 | 1.08366200  |
| H | -7.28535600  | -3.34897400 | 2.06487300  |
| H | -8.29467200  | -4.46016500 | 1.11956100  |
| S | -8.98023000  | 0.65876900  | 0.16958000  |
| C | -9.77880300  | -1.81936700 | 0.01882600  |
| H | -10.41834500 | -2.69135700 | -0.05469600 |
| C | -15.18490700 | 3.22346200  | -0.58098900 |
| C | -13.85699100 | 2.86323500  | -0.61856300 |
| C | -13.44467700 | 1.56141000  | -0.22212900 |
| C | -14.43910500 | 0.62711100  | 0.21435100  |
| C | -15.79894500 | 1.02964500  | 0.24255700  |
| C | -16.16602900 | 2.29918700  | -0.14609800 |
| H | -11.35012400 | 1.87148300  | -0.61907200 |
| H | -15.48597300 | 4.22145600  | -0.88559200 |
| H | -13.10330100 | 3.57180500  | -0.95180600 |
| C | -12.08664500 | 1.15942900  | -0.25597300 |
| C | -14.01586300 | -0.67208800 | 0.60693200  |
| H | -16.54892400 | 0.31725400  | 0.57647800  |
| H | -17.21022700 | 2.59623100  | -0.12113800 |
| C | -12.69223800 | -1.03021300 | 0.57371000  |
| C | -11.68843900 | -0.11237500 | 0.13256100  |
| H | -14.76189300 | -1.38371600 | 0.95109600  |
| H | -12.39404300 | -2.01761100 | 0.91021800  |
| C | 12.69223700  | 1.03020500  | -0.57372100 |
| C | 14.01586200  | 0.67207900  | -0.60694000 |
| C | 14.43910400  | -0.62711400 | -0.21434400 |
| C | 13.44467700  | -1.56140800 | 0.22214800  |
| C | 12.08664500  | -1.15942700 | 0.25599000  |
| C | 11.68843900  | 0.11237300  | -0.13256000 |
| H | 16.54892300  | -0.31726300 | -0.57647800 |
| H | 12.39404200  | 2.01760000  | -0.91024100 |
| H | 14.76189200  | 1.38370300  | -0.95111400 |
| C | 15.79894400  | -1.02964900 | -0.24254800 |
| C | 13.85699100  | -2.86322800 | 0.61859800  |
| H | 11.35012400  | -1.87147600 | 0.61909800  |
| C | 15.18490700  | -3.22345600 | 0.58102700  |
| C | 16.16602800  | -2.29918600 | 0.14612200  |

## Supplementary Information

---

|   |             |             |            |
|---|-------------|-------------|------------|
| H | 13.10330200 | -3.57179400 | 0.95185100 |
| H | 15.48597400 | -4.22144600 | 0.88564200 |
| H | 17.21022700 | -2.59623100 | 0.12116500 |

Optimized coordinates for Flu-NTC singlet state at RB3LYP/6-31G(d,p) level of theory and basis set.

|   |              |             |             |
|---|--------------|-------------|-------------|
| C | -1.41735300  | -2.15234600 | 0.19173800  |
| C | 0.00644300   | -1.85609800 | 0.19145600  |
| C | 0.49443600   | -0.49997500 | 0.19106200  |
| C | -0.49443700  | 0.49996400  | 0.19102000  |
| C | -1.88313000  | 0.20230600  | 0.19122200  |
| C | -2.40216400  | -1.08323400 | 0.19134200  |
| C | 1.88312900   | -0.20231600 | 0.19128200  |
| C | -0.00644300  | 1.85608700  | 0.19134400  |
| C | 1.41735200   | 2.15233600  | 0.19164300  |
| C | 2.40216200   | 1.08322400  | 0.19133300  |
| H | 2.55388500   | -1.05513300 | 0.19197300  |
| H | -2.55388700  | 1.05512300  | 0.19183700  |
| N | -0.78221300  | 2.93790500  | 0.19140600  |
| N | 1.67374700   | 3.46097800  | 0.19193700  |
| S | 0.22202700   | 4.24225800  | 0.19190000  |
| N | -1.67374800  | -3.46098800 | 0.19210500  |
| N | 0.78221200   | -2.93791500 | 0.19160200  |
| S | -0.22202800  | -4.24226800 | 0.19215000  |
| C | 7.11057600   | 3.35544200  | 0.19987600  |
| C | 8.24795600   | 2.33406300  | 0.19444700  |
| C | 7.74801700   | 1.03980000  | 0.18429500  |
| C | 6.31409500   | 1.09003000  | 0.18545900  |
| C | 5.90409100   | 2.41652100  | 0.19525800  |
| C | 3.82873200   | 1.34616600  | 0.19100200  |
| C | 4.50417900   | 2.56206800  | 0.19826500  |
| H | 3.97030800   | 3.50218500  | 0.20478400  |
| C | 10.24282400  | 1.12065700  | 0.16659000  |
| S | 4.98382300   | -0.00997000 | 0.17979400  |
| C | 7.14114700   | 4.24428400  | -1.06310700 |
| H | 6.27816000   | 4.91779400  | -1.07899600 |
| H | 8.04843100   | 4.85726400  | -1.08030300 |
| H | 7.11955200   | 3.63708900  | -1.97188900 |
| C | 7.14187900   | 4.23077700  | 1.47228300  |
| H | 6.27832500   | 4.90331100  | 1.49637300  |
| H | 7.12186700   | 3.61394500  | 2.37460900  |
| H | 8.04862500   | 4.84438900  | 1.49476700  |
| S | 9.00551500   | -0.14757200 | 0.17159600  |
| C | 9.65878700   | 2.37735400  | 0.18394600  |
| H | 10.24711700  | 3.28735000  | 0.15804500  |
| C | -7.11057900  | -3.35545100 | 0.19974200  |
| C | -8.24795800  | -2.33407200 | 0.19436600  |
| C | -7.74801900  | -1.03980800 | 0.18429000  |
| C | -6.31409700  | -1.09004000 | 0.18545900  |
| C | -5.90409300  | -2.41653100 | 0.19518400  |
| C | -3.82873400  | -1.34617600 | 0.19100000  |
| C | -4.50418100  | -2.56207900 | 0.19819100  |
| H | -3.97031100  | -3.50219700 | 0.20466200  |
| C | -10.24282600 | -1.12066300 | 0.16656300  |
| S | -4.98382500  | 0.00996100  | 0.17987000  |
| C | -7.14114400  | -4.24422300 | -1.06329100 |
| H | -6.27815700  | -4.91773100 | -1.07921500 |
| H | -8.04842800  | -4.85720100 | -1.08052600 |
| H | -7.11954500  | -3.63697600 | -1.97203800 |
| C | -7.14188800  | -4.23085800 | 1.47209900  |
| H | -6.27833500  | -4.90339500 | 1.49615500  |
| H | -7.12188000  | -3.61407800 | 2.37446000  |
| H | -8.04863500  | -4.84447200 | 1.49454400  |
| S | -9.00551600  | 0.14756500  | 0.17165300  |
| C | -9.65878900  | -2.37736200 | 0.18385200  |
| H | -10.24712200 | -3.28735500 | 0.15789300  |
| C | -12.61504900 | -1.68734600 | 0.66613300  |
| C | -11.66455600 | -0.77796400 | 0.15341300  |
| C | -12.12153800 | 0.45216700  | -0.36817900 |



## Supplementary Information

---

|   |              |             |             |
|---|--------------|-------------|-------------|
| C | -13.47556000 | 0.74629400  | -0.37089800 |
| C | -14.41180500 | -0.17746800 | 0.13522000  |
| C | -13.97622000 | -1.39961700 | 0.65336300  |
| H | -12.27280300 | -2.62084600 | 1.10086300  |
| H | -11.40636400 | 1.15540800  | -0.78682800 |
| H | -14.68388100 | -2.11809900 | 1.05740500  |
| C | -14.17611500 | 2.00413600  | -0.88595500 |
| C | -15.63888500 | 1.66685300  | -0.59592500 |
| C | -16.77440200 | 2.43035300  | -0.84055800 |
| C | -18.02951900 | 1.91861700  | -0.49022300 |
| C | -18.14300500 | 0.65499300  | 0.09868200  |
| C | -17.00697200 | -0.11754100 | 0.34723600  |
| C | -15.75461900 | 0.39328500  | -0.00202000 |
| H | -16.69742200 | 3.41350500  | -1.29773400 |
| H | -18.92265800 | 2.50762600  | -0.67720200 |
| H | -19.12377200 | 0.27169100  | 0.36488200  |
| H | -17.10044100 | -1.09847800 | 0.80489900  |
| C | 18.14300500  | -0.65498900 | 0.09868700  |
| C | 18.02952300  | -1.91859300 | -0.49026300 |
| C | 16.77440900  | -2.43031800 | -0.84062200 |
| C | 15.63889000  | -1.66682700 | -0.59596900 |
| C | 15.75462000  | -0.39328000 | -0.00201900 |
| C | 17.00697100  | 0.11753400  | 0.34726300  |
| H | 19.12377100  | -0.27169600 | 0.36490600  |
| H | 18.92266400  | -2.50759500 | -0.67725700 |
| H | 16.69743200  | -3.41345300 | -1.29783300 |
| H | 17.10043600  | 1.09845600  | 0.80496000  |
| C | 14.17612200  | -2.00410100 | -0.88601900 |
| C | 13.47556300  | -0.74627700 | -0.37092200 |
| C | 12.12154100  | -0.45215100 | -0.36820000 |
| C | 11.66455500  | 0.77796000  | 0.15343400  |
| C | 12.61504400  | 1.68732500  | 0.66619300  |
| C | 13.97621600  | 1.39959700  | 0.65342000  |
| C | 14.41180400  | 0.17746700  | 0.13523500  |
| H | 11.40637000  | -1.15537800 | -0.78687800 |
| H | 12.27279600  | 2.62080800  | 1.10095600  |
| H | 14.68387400  | 2.11806400  | 1.05749200  |
| C | 13.72169600  | -3.25932000 | -0.10799600 |
| H | 13.88426100  | -3.13710300 | 0.96642900  |
| H | 12.65664300  | -3.45282000 | -0.27322100 |
| H | 14.27854700  | -4.14175100 | -0.44006900 |
| C | 13.93390100  | -2.20435300 | -2.39886700 |
| H | 12.87241400  | -2.38145800 | -2.60125400 |
| H | 14.24844800  | -1.32510300 | -2.96786200 |
| H | 14.49461300  | -3.06940200 | -2.76811100 |
| C | -13.93388500 | 2.20444300  | -2.39879400 |
| H | -12.87239700 | 2.38155400  | -2.60116900 |
| H | -14.24842900 | 1.32521200  | -2.96782200 |
| H | -14.49459400 | 3.06950400  | -2.76801100 |
| C | -13.72169300 | 3.25932800  | -0.10788400 |
| H | -13.88426500 | 3.13707300  | 0.96653600  |
| H | -12.65663900 | 3.45283300  | -0.27309700 |
| H | -14.27854100 | 4.14177100  | -0.43993000 |

Optimized coordinates for TPAOMe-BTT singlet state at RB3LYP/6-31G(d,p) level of theory and basis set.

|   |             |             |             |
|---|-------------|-------------|-------------|
| C | 2.93727700  | -2.64806800 | 0.09640400  |
| C | 3.84934300  | -3.68033900 | 0.17769700  |
| C | 5.21496100  | -3.27961000 | 0.16019300  |
| H | 3.53772300  | -4.71228100 | 0.26550300  |
| C | 5.36386400  | -1.90586900 | 0.05951300  |
| C | -2.93727700 | -2.64806800 | 0.09640100  |
| C | -3.84934400 | -3.68034100 | 0.17768400  |
| C | -5.21496200 | -3.27961000 | 0.16018000  |
| H | -3.53772300 | -4.71228300 | 0.26548000  |
| C | -5.36386400 | -1.90586900 | 0.05951400  |
| S | -3.79742800 | -1.11870200 | -0.02439300 |
| S | 3.79742800  | -1.11870300 | -0.02440700 |

## Supplementary Information

---

|   |              |             |             |
|---|--------------|-------------|-------------|
| C | 6.58000100   | -1.08762200 | 0.01585000  |
| C | 6.64672800   | 0.16219100  | 0.66203700  |
| C | 7.72523000   | -1.50483700 | -0.68990800 |
| C | 7.79229600   | 0.94498600  | 0.62207500  |
| H | 5.79247400   | 0.51063700  | 1.23507500  |
| C | 8.87413000   | -0.72612100 | -0.74048900 |
| H | 7.70080100   | -2.43591100 | -1.24548500 |
| C | 8.93381300   | 0.51566400  | -0.08107600 |
| H | 7.81414800   | 1.89229900  | 1.14900200  |
| H | 9.73057000   | -1.06963700 | -1.30989900 |
| C | -6.58000200  | -1.08762200 | 0.01585300  |
| C | -6.64673500  | 0.16218100  | 0.66205900  |
| C | -7.72522400  | -1.50482700 | -0.68992100 |
| C | -7.79230200  | 0.94497600  | 0.62209900  |
| H | -5.79248400  | 0.51061900  | 1.23510900  |
| C | -8.87412400  | -0.72611000 | -0.74050000 |
| H | -7.70078900  | -2.43589300 | -1.24551200 |
| C | -8.93381400  | 0.51566400  | -0.08106800 |
| H | -7.81415900  | 1.89228100  | 1.14904000  |
| H | -9.73055900  | -1.06961800 | -1.30992200 |
| N | 10.09932200  | 1.30760400  | -0.12868200 |
| N | -10.09932200 | 1.30760400  | -0.12867200 |
| C | -10.01247800 | 2.73043600  | -0.09140500 |
| C | -10.83415300 | 3.47405600  | 0.76135100  |
| C | -9.11551400  | 3.41888200  | -0.92735400 |
| C | -10.77811000 | 4.86930900  | 0.78280000  |
| H | -11.53199400 | 2.95686000  | 1.41164800  |
| C | -9.03780000  | 4.80344400  | -0.89532900 |
| H | -8.47647800  | 2.85744800  | -1.60091600 |
| C | -9.87190700  | 5.54284800  | -0.04322600 |
| H | -11.43378800 | 5.41208700  | 1.45305300  |
| H | -8.34652000  | 5.33935500  | -1.53727600 |
| C | -11.38832400 | 0.70146800  | -0.19364400 |
| C | -11.73759000 | -0.34569100 | 0.66558400  |
| C | -12.34425800 | 1.15740000  | -1.11777100 |
| C | -12.99864800 | -0.94216900 | 0.60112000  |
| H | -11.01346700 | -0.70420000 | 1.38984900  |
| C | -13.60690200 | 0.58537500  | -1.17247700 |
| H | -12.08823900 | 1.96903600  | -1.79076300 |
| C | -13.94477100 | -0.47411600 | -0.31741100 |
| H | -13.23194200 | -1.75410000 | 1.27948600  |
| H | -14.34853500 | 0.93433300  | -1.88339800 |
| C | 11.38832500  | 0.70146600  | -0.19363200 |
| C | 12.34426800  | 1.15738400  | -1.11775500 |
| C | 11.73758200  | -0.34568000 | 0.66561600  |
| C | 13.60691300  | 0.58535900  | -1.17244100 |
| H | 12.08825600  | 1.96901000  | -1.79076300 |
| C | 12.99864100  | -0.94215900 | 0.60117300  |
| H | 11.01345200  | -0.70417900 | 1.38987900  |
| C | 13.94477300  | -0.47412000 | -0.31735600 |
| H | 14.34855200  | 0.93430600  | -1.88335900 |
| H | 13.23192800  | -1.75408000 | 1.27955300  |
| C | 10.01247800  | 2.73043500  | -0.09143700 |
| C | 10.83414500  | 3.47406800  | 0.76131600  |
| C | 9.11552300   | 3.41887000  | -0.92740600 |
| C | 10.77810200  | 4.86932200  | 0.78274300  |
| H | 11.53197800  | 2.95688300  | 1.41162800  |
| C | 9.03780900   | 4.80343200  | -0.89540300 |
| H | 8.47649400   | 2.85742500  | -1.60096600 |
| C | 9.87190700   | 5.54284900  | -0.04330300 |
| H | 11.43377300  | 5.41211000  | 1.45299500  |
| H | 8.34653600   | 5.33933400  | -1.53736500 |
| O | -15.20883900 | -0.97375000 | -0.45987800 |
| O | -9.72448700  | 6.90027900  | -0.09804800 |
| O | 9.72448900   | 6.90027800  | -0.09814700 |
| O | 15.20884300  | -0.97375600 | -0.45980300 |
| C | -15.60243300 | -2.04588500 | 0.38082600  |
| H | -16.62849800 | -2.28837200 | 0.10053400  |
| H | -14.97002100 | -2.93095200 | 0.23315100  |

## Supplementary Information

---

|   |              |             |             |
|---|--------------|-------------|-------------|
| H | -15.57649600 | -1.76163600 | 1.44084300  |
| C | -10.54180000 | 7.69597800  | 0.74458700  |
| H | -10.36530500 | 7.47732800  | 1.80576400  |
| H | -10.26590400 | 8.73184600  | 0.54203900  |
| H | -11.60830600 | 7.55764300  | 0.52421300  |
| C | 10.54179300  | 7.69599100  | 0.74448400  |
| H | 10.26589900  | 8.73185600  | 0.54191700  |
| H | 10.36528700  | 7.47735700  | 1.80566300  |
| H | 11.60830200  | 7.55765100  | 0.52412300  |
| C | 15.60242800  | -2.04587800 | 0.38092100  |
| H | 16.62849600  | -2.28836900 | 0.10064200  |
| H | 15.57648000  | -1.76161400 | 1.44093300  |
| H | 14.97001700  | -2.93094800 | 0.23325300  |
| C | 1.48319000   | -2.68617100 | 0.10324400  |
| C | 0.70579300   | -1.53652000 | 0.12696900  |
| C | 0.73109000   | -3.91855500 | 0.08307900  |
| C | -0.70579300  | -1.53652000 | 0.12696800  |
| C | -0.73108900  | -3.91855500 | 0.08307800  |
| C | -1.48319000  | -2.68617100 | 0.10324300  |
| N | 1.25372600   | -5.14801400 | 0.06030200  |
| N | -1.25372500  | -5.14801500 | 0.06030100  |
| S | 0.00000100   | -6.20852800 | 0.04091800  |
| C | -6.33781300  | -4.27652000 | 0.29373500  |
| H | -7.22997400  | -3.82465800 | 0.73407400  |
| H | -6.62692000  | -4.70002700 | -0.67639500 |
| H | -6.02992200  | -5.11289800 | 0.92881700  |
| C | 6.33781200   | -4.27655000 | 0.29376000  |
| H | 6.62692500   | -4.70003100 | -0.67636600 |
| H | 7.22997100   | -3.82465200 | 0.73410000  |
| H | 6.02991800   | -5.11289200 | 0.92884500  |
| H | -1.19866900  | -0.56958800 | 0.15473900  |
| H | 1.19866800   | -0.56958800 | 0.15474100  |

Optimized coordinates for TPAOMe-NTT singlet state at RB3LYP/6-31G(d,p) level of theory and basis set.

|   |             |             |             |
|---|-------------|-------------|-------------|
| C | 1.20967100  | -1.59548400 | 1.62156800  |
| C | -0.17932600 | -1.32759800 | 1.28440600  |
| C | -0.53762700 | -0.33793300 | 0.30029700  |
| C | 0.53763200  | 0.33797100  | -0.30022900 |
| C | 1.89363800  | 0.07013900  | 0.03682400  |
| C | 2.28742100  | -0.87040800 | 0.97229900  |
| C | -1.89363200 | -0.07010400 | -0.03675900 |
| C | 0.17933200  | 1.32763600  | -1.28433800 |
| C | -1.20966500 | 1.59552100  | -1.62150200 |
| C | -2.28741500 | 0.87044100  | -0.97223600 |
| H | -2.64265000 | -0.65751600 | 0.48379400  |
| H | 2.64265600  | 0.65754900  | -0.48373200 |
| N | 1.05194800  | 2.07204300  | -1.96063600 |
| N | -1.34421100 | 2.54323200  | -2.55035500 |
| S | 0.17238700  | 3.04501500  | -2.95562100 |
| N | 1.34421700  | -2.54319500 | 2.55042300  |
| N | -1.05194200 | -2.07200300 | 1.96070700  |
| S | -0.17238000 | -3.04497400 | 2.95569300  |
| C | -3.68772800 | 1.11871400  | -1.28039600 |
| C | -4.24678400 | 1.92302600  | -2.25257600 |
| S | -4.96653000 | 0.33697200  | -0.36169000 |
| C | -5.66913500 | 1.91872800  | -2.29097200 |
| H | -3.63946000 | 2.49561300  | -2.94038700 |
| C | -6.22258700 | 1.09526200  | -1.32349300 |
| C | 3.68773500  | -1.11868900 | 1.28045200  |
| C | 4.24679200  | -1.92302400 | 2.25261100  |
| S | 4.96653600  | -0.33693500 | 0.36175300  |
| C | 5.66914400  | -1.91873600 | 2.29097700  |
| H | 3.63946900  | -2.49562200 | 2.94041400  |
| C | 6.22259500  | -1.09525400 | 1.32353200  |
| C | -6.44073200 | 2.69970100  | -3.32383400 |
| H | -6.63269100 | 3.73006500  | -2.99882100 |
| H | -5.87348900 | 2.75916500  | -4.25767500 |
| H | -7.40705900 | 2.23814100  | -3.54102800 |

## Supplementary Information

---

|   |              |             |             |
|---|--------------|-------------|-------------|
| C | 6.44074600   | -2.69973600 | 3.32383600  |
| H | 5.87351800   | -2.75920400 | 4.25768600  |
| H | 6.63268200   | -3.73009800 | 2.99880400  |
| H | 7.40708400   | -2.23819500 | 3.54101900  |
| C | -9.94980200  | 1.52816500  | -0.79777700 |
| C | -8.61806000  | 1.80380900  | -1.07968300 |
| C | -7.62887300  | 0.80295100  | -1.02517700 |
| C | -8.04526900  | -0.48902400 | -0.64967800 |
| C | -9.37073400  | -0.77021300 | -0.34839900 |
| C | -10.35532700 | 0.23335800  | -0.42328700 |
| H | -8.33741700  | 2.82034800  | -1.33277000 |
| H | -7.31398900  | -1.29024300 | -0.59869700 |
| H | -9.65304700  | -1.77556100 | -0.05704200 |
| C | 8.04528800   | 0.48903300  | 0.64975100  |
| C | 7.62888100   | -0.80295100 | 1.02520800  |
| C | 8.61805500   | -1.80382400 | 1.07966200  |
| C | 9.94979500   | -1.52818900 | 0.79774000  |
| C | 10.35533200  | -0.23337500 | 0.42328800  |
| C | 9.37075200   | 0.77021300  | 0.34845800  |
| H | 7.31401900   | 1.29026400  | 0.59881300  |
| H | 8.33740200   | -2.82036900 | 1.33271800  |
| H | 9.65307400   | 1.77556800  | 0.05713300  |
| H | 10.68560700  | -2.32226700 | 0.85678300  |
| H | -10.68562400 | 2.32222900  | -0.85686200 |
| N | -11.70503800 | -0.04913600 | -0.13103000 |
| N | 11.70504000  | 0.04911000  | 0.13101100  |
| C | -12.54678000 | 0.94371800  | 0.45224600  |
| C | -13.82955700 | 1.18508300  | -0.06879500 |
| C | -12.12568700 | 1.68634700  | 1.56027100  |
| C | -14.66123600 | 2.13483100  | 0.50637700  |
| H | -14.17015300 | 0.61629000  | -0.92772300 |
| C | -12.94793000 | 2.66032600  | 2.13073600  |
| H | -11.14084300 | 1.50661700  | 1.97893600  |
| C | -14.22631600 | 2.88607300  | 1.60841600  |
| H | -15.65281100 | 2.32431100  | 0.10880700  |
| H | -12.58620800 | 3.21943000  | 2.98534100  |
| C | -12.25016600 | -1.34147400 | -0.38916500 |
| C | -13.01609200 | -1.99968100 | 0.57790100  |
| C | -12.04999100 | -1.97225800 | -1.62979700 |
| C | -13.57995400 | -3.25168300 | 0.32320400  |
| H | -13.18015600 | -1.52493800 | 1.53968600  |
| C | -12.58752500 | -3.22583500 | -1.88215300 |
| H | -11.46503900 | -1.47149000 | -2.39424100 |
| C | -13.36199300 | -3.87613500 | -0.90958700 |
| H | -14.17167900 | -3.72916100 | 1.09497800  |
| H | -12.43467800 | -3.71767700 | -2.83708400 |
| C | 12.54675700  | -0.94372900 | -0.45232300 |
| C | 13.82955400  | -1.18511000 | 0.06866200  |
| C | 12.12562300  | -1.68632800 | -1.56035300 |
| C | 14.66121100  | -2.13484200 | -0.50656700 |
| H | 14.17018400  | -0.61634000 | 0.92759200  |
| C | 12.94784300  | -2.66029100 | -2.13087600 |
| H | 11.14076300  | -1.50658600 | -1.97897500 |
| C | 14.22624900  | -2.88605300 | -1.60861000 |
| H | 15.65280100  | -2.32433300 | -0.10904100 |
| H | 12.58608900  | -3.21937100 | -2.98548200 |
| C | 12.25018700  | 1.34143500  | 0.38917500  |
| C | 13.01607100  | 1.99967800  | -0.57789800 |
| C | 12.05007200  | 1.97216800  | 1.62984400  |
| C | 13.57995200  | 3.25166700  | -0.32317400 |
| H | 13.18008800  | 1.52497500  | -1.53971100 |
| C | 12.58762500  | 3.22573100  | 1.88222800  |
| H | 11.46515200  | 1.47137100  | 2.39429200  |
| C | 13.36205100  | 3.87606700  | 0.90965300  |
| H | 14.17164400  | 3.72917500  | -1.09495500 |
| H | 12.43482500  | 3.71753400  | 2.83718700  |
| O | -15.11674500 | 3.80277600  | 2.09211400  |
| O | -13.85468400 | -5.10055000 | -1.26321500 |
| O | 13.85476700  | 5.10046400  | 1.26331000  |

## Supplementary Information

|   |              |             |             |
|---|--------------|-------------|-------------|
| O | 15.11666000  | -3.80274300 | -2.09236700 |
| C | -14.72813300 | 4.58862000  | 3.20707900  |
| H | -15.57192500 | 5.24591600  | 3.42181300  |
| H | -14.52146000 | 3.96836000  | 4.08887600  |
| H | -13.84337200 | 5.19919000  | 2.98481300  |
| C | -14.64118100 | -5.80384200 | -0.31543900 |
| H | -14.92683600 | -6.74063300 | -0.79602000 |
| H | -14.07412800 | -6.02597900 | 0.59784500  |
| H | -15.54759700 | -5.24615600 | -0.04617700 |
| C | 14.64122100  | 5.80379400  | 0.31552600  |
| H | 14.07412400  | 6.02597100  | -0.59772200 |
| H | 14.92690200  | 6.74056400  | 0.79613300  |
| H | 15.54762200  | 5.24611600  | 0.04619600  |
| C | 14.72800600  | -4.58856000 | -3.20733700 |
| H | 14.52130000  | -3.96827900 | -4.08911200 |
| H | 15.57178900  | -5.24585100 | -3.42211800 |
| H | 13.84325300  | -5.19913500 | -2.98505200 |

Optimized coordinates for TPAOMe-BBTT singlet state at UB3LYP/6-31G(d,p) level of theory and basis set.

|   |              |             |             |
|---|--------------|-------------|-------------|
| C | -2.81558900  | 0.92740700  | 0.00082300  |
| C | -3.29072100  | 2.23849300  | 0.05361700  |
| C | -4.69441800  | 2.37482800  | 0.03882900  |
| H | -2.61767800  | 3.08120400  | 0.11963900  |
| C | -5.34312600  | 1.14257900  | -0.02300000 |
| C | 2.81558900   | -0.92740600 | -0.00082000 |
| C | 3.29072100   | -2.23849300 | -0.05361500 |
| C | 4.69441700   | -2.37482800 | -0.03882700 |
| H | 2.61767700   | -3.08120500 | -0.11963600 |
| C | 5.34312600   | -1.14257900 | 0.02300200  |
| S | 4.19087200   | 0.17732600  | 0.07392900  |
| S | -4.19087200  | -0.17732600 | -0.07392700 |
| C | -6.77312300  | 0.83861300  | -0.03784400 |
| C | -7.28086700  | -0.32369700 | 0.58017400  |
| C | -7.70642600  | 1.67336300  | -0.68686700 |
| C | -8.63354800  | -0.62847400 | 0.56646900  |
| H | -6.60137400  | -0.98219700 | 1.11276000  |
| C | -9.06099100  | 1.37254200  | -0.71261200 |
| H | -7.35954000  | 2.54947600  | -1.22257000 |
| C | -9.55667000  | 0.21544800  | -0.08170600 |
| H | -8.98787500  | -1.51919700 | 1.07284200  |
| H | -9.74527800  | 2.02667800  | -1.24124000 |
| C | 6.77312300   | -0.83861300 | 0.03784600  |
| C | 7.28086700   | 0.32369700  | -0.58017300 |
| C | 7.70642600   | -1.67336300 | 0.68686800  |
| C | 8.63354800   | 0.62847400  | -0.56646900 |
| H | 6.60137400   | 0.98219700  | -1.11275900 |
| C | 9.06099200   | -1.37254300 | 0.71261200  |
| H | 7.35954100   | -2.54947600 | 1.22257100  |
| C | 9.55667000   | -0.21544800 | 0.08170600  |
| H | 8.98787400   | 1.51919700  | -1.07284200 |
| H | 9.74527900   | -2.02667800 | 1.24124000  |
| N | -10.93088600 | -0.09057300 | -0.10284500 |
| N | 10.93088600  | 0.09057200  | 0.10284400  |
| C | 11.37504900  | 1.44588900  | 0.08352700  |
| C | 12.39104300  | 1.85119900  | -0.78740300 |
| C | 10.81839400  | 2.39802800  | 0.95571300  |
| C | 12.85403200  | 3.16861000  | -0.79264600 |
| H | 12.83065000  | 1.12691500  | -1.46526500 |
| C | 11.25758600  | 3.71360300  | 0.94097200  |
| H | 10.03494700  | 2.09759200  | 1.64359500  |
| C | 12.28302600  | 4.11101500  | 0.06956600  |
| H | 13.64588600  | 3.44553000  | -1.47820600 |
| H | 10.83072300  | 4.45284700  | 1.61059500  |
| C | 11.90826100  | -0.94790900 | 0.12703300  |
| C | 11.83517100  | -2.02775600 | -0.75908000 |
| C | 12.97887600  | -0.89697500 | 1.03617900  |
| C | 12.79034200  | -3.04610000 | -0.73545500 |
| H | 11.01895400  | -2.07694000 | -1.47239800 |

## Supplementary Information

---

|   |              |             |             |
|---|--------------|-------------|-------------|
| C | 13.94392700  | -1.89331100 | 1.05099300  |
| H | 13.04882000  | -0.06513300 | 1.72926800  |
| C | 13.85611200  | -2.98082900 | 0.16906500  |
| H | 12.69933600  | -3.86932000 | -1.43387800 |
| H | 14.77276700  | -1.85880700 | 1.75026300  |
| C | -11.90826100 | 0.94790800  | -0.12703500 |
| C | -12.97887500 | 0.89697500  | -1.03618100 |
| C | -11.83517100 | 2.02775500  | 0.75907900  |
| C | -13.94392600 | 1.89331100  | -1.05099500 |
| H | -13.04881800 | 0.06513300  | -1.72927000 |
| C | -12.79034200 | 3.04610000  | 0.73545400  |
| H | -11.01895500 | 2.07694000  | 1.47239800  |
| C | -13.85611200 | 2.98082900  | -0.16906700 |
| H | -14.77276500 | 1.85880700  | -1.75026600 |
| H | -12.69933700 | 3.86931900  | 1.43387700  |
| C | -11.37504800 | -1.44589000 | -0.08352800 |
| C | -12.39104300 | -1.85119900 | 0.78740100  |
| C | -10.81839300 | -2.39802800 | -0.95571400 |
| C | -12.85403200 | -3.16861000 | 0.79264400  |
| H | -12.83065100 | -1.12691500 | 1.46526300  |
| C | -11.25758500 | -3.71360300 | -0.94097400 |
| H | -10.03494600 | -2.09759200 | -1.64359500 |
| C | -12.28302500 | -4.11101500 | -0.06956800 |
| H | -13.64588600 | -3.44553100 | 1.47820300  |
| H | -10.83072200 | -4.45284700 | -1.61059700 |
| O | 14.85042400  | -3.91204300 | 0.27268100  |
| O | 12.64916100  | 5.42504900  | 0.14305900  |
| O | -12.64916100 | -5.42504900 | -0.14306200 |
| O | -14.85042400 | 3.91204300  | -0.27268400 |
| C | 14.81086600  | -5.03260700 | -0.59599500 |
| H | 15.68072400  | -5.64074700 | -0.34379900 |
| H | 13.90034200  | -5.62793200 | -0.44929500 |
| H | 14.87505700  | -4.73196800 | -1.64978800 |
| C | 13.67827300  | 5.88205000  | -0.71939500 |
| H | 13.40371000  | 5.76615800  | -1.77586000 |
| H | 13.80900300  | 6.94218200  | -0.49778400 |
| H | 14.62449500  | 5.35645000  | -0.53645700 |
| C | -13.67827300 | -5.88205100 | 0.71939200  |
| H | -13.80900200 | -6.94218300 | 0.49778100  |
| H | -13.40371000 | -5.76615800 | 1.77585700  |
| H | -14.62449500 | -5.35645000 | 0.53645400  |
| C | -14.81086700 | 5.03260600  | 0.59599300  |
| H | -15.68072400 | 5.64074600  | 0.34379600  |
| H | -14.87505800 | 4.73196700  | 1.64978500  |
| H | -13.90034300 | 5.62793200  | 0.44929300  |
| C | -1.44916300  | 0.48387300  | -0.00016300 |
| C | -0.32365100  | 1.37216700  | 0.03288700  |
| C | -1.06926500  | -0.89540400 | -0.03458900 |
| C | 1.06926400   | 0.89540400  | 0.03459100  |
| C | 0.32365000   | -1.37216600 | -0.03288500 |
| C | 1.44916300   | -0.48387300 | 0.00016600  |
| N | -1.95927900  | -1.89606400 | -0.07207400 |
| N | 0.40547200   | -2.71110500 | -0.06692800 |
| N | -0.40547300  | 2.71110500  | 0.06693100  |
| N | 1.95927800   | 1.89606500  | 0.07207600  |
| S | -1.12228400  | -3.30329200 | -0.10008000 |
| S | 1.12228300   | 3.30329300  | 0.10008200  |
| C | 5.36350300   | -3.72216600 | -0.14090900 |
| H | 6.31298600   | -3.66312600 | -0.67959700 |
| H | 5.57244000   | -4.15363000 | 0.84605500  |
| H | 4.71537100   | -4.42791800 | -0.66849200 |
| C | -5.36350300  | 3.72216500  | 0.14091100  |
| H | -5.57244100  | 4.15363000  | -0.84605200 |
| H | -6.31298600  | 3.66312600  | 0.67959900  |
| H | -4.71537100  | 4.42791800  | 0.66849500  |

## Supplementary Reference

1. Dimroth, K.; Umbach, W.; Blöcher, K. H., Bis-phenoxy-Radicals of the Polyphenyl Series. *Angew. Chem. Int. Ed.* **1963**, *2* (10), 620-621.
2. Zeng, Z.; Sung, Y. M.; Bao, N.; Tan, D.; Lee, R.; Zafra, J. L.; Lee, B. S.; Ishida, M.; Ding, J.; Lopez Navarrete, J. T.; Li, Y.; Zeng, W.; Kim, D.; Huang, K. W.; Webster, R. D.; Casado, J.; Wu, J., Stable tetrabenzo-Chichibabin's hydrocarbons: tunable ground state and unusual transition between their closed-shell and open-shell resonance forms. *J. Am. Chem. Soc.* **2012**, *134* (35), 14513-14525.
3. Casado, J.; Miller, L. L.; Mann, K. R.; Pappenfus, T. M.; Higuchi, H.; Ortí, E.; Milián, B.; Pou-Américo, R.; Hernández, V.; López Navarrete, J. T., Quinonoid oligothiophenes as electron-donor and electron-acceptor materials. A spectroelectrochemical and theoretical study. *J. Am. Chem. Soc.* **2002**, *124* (41), 12380-12388.
4. Takahashi, T.; Matsuoka, K.-i.; Takimiya, K.; Otsubo, T.; Aso, Y., Extensive quinoidal oligothiophenes with dicyanomethylene groups at terminal positions as highly amphoteric redox molecules. *J. Am. Chem. Soc.* **2005**, *127* (25), 8928-8929.
5. Qiao, Y.; Guo, Y.; Yu, C.; Zhang, F.; Xu, W.; Liu, Y.; Zhu, D. Diketopyrrolopyrrole-containing quinoidal small molecules for high-performance, air-stable, and solution-processable *n*-channel organic field-effect transistors. *J. Am. Chem. Soc.* **2012**, *134* (9), 4084-4087.
6. Xia, D.; Keerthi, A.; An, C.; Baumgarten, M., Synthesis of a quinoidal dithieno[2,3-*d*;2',3'-*d*]benzo[2,1-*b*;3,4-*b'*]-dithiophene based open-shell singlet biradicaloid. *Org. Chem. Front.* **2017**, *4* (1), 18-21.
7. Zhang, C.; Medina Rivero, S.; Liu, W.; Casanova, D.; Zhu, X.; Casado, J., Stable cross-conjugated tetrathiophene diradical. *Angew. Chem. Int. Ed.* **2019**, *58* (33), 11291-11295.
8. Yang, K.; Zhang, X.; Harbuzaru, A.; Wang, L.; Wang, Y.; Koh, C.; Guo, H.; Shi, Y.; Chen, J.; Sun, H.; Feng, K.; Ruiz Delgado, M. C.; Woo, H. Y.; Ortiz, R. P.; Guo, X., Stable organic diradicals based on fused quinoidal oligothiophene imides with high electrical conductivity. *J. Am. Chem. Soc.* **2020**, *142* (9), 4329-4340.
9. Chase, D. T.; Rose, B. D.; McClintock, S. P.; Zakharov, L. N.; Haley, M. M., Indeno[1,2-*b*]fluorenes: fully conjugated antiaromatic analogues of acenes. *Angew. Chem. Int. Ed.* **2011**, *50* (5), 1127-1130.
10. Shimizu, A.; Kishi, R.; Nakano, M.; Shiomi, D.; Sato, K.; Takui, T.; Hisaki, I.; Miyata, M.; Tobe, Y., Indeno[2,1-*b*]fluorene: a 20- $\pi$ -electron hydrocarbon with very low-energy light absorption. *Angew. Chem. Int. Ed.* **2013**, *52* (23), 6076-6079.
11. Barker, J. E.; Dressler, J. J.; Cardenas Valdivia, A.; Kishi, R.; Strand, E. T.; Zakharov, L. N.; MacMillan, S. N.; Gomez-Garcia, C. J.; Nakano, M.; Casado, J.; Haley, M. M., Molecule isomerism modulates the diradical properties of singlet diradicaloids. *J. Am. Chem. Soc.* **2020**, *142* (3), 1548-1555.
12. Hiroto, S.; Furukawa, K.; Shinokubo, H.; Osuka, A., Synthesis and biradicaloid character of doubly linked corrole dimers. *J. Am. Chem. Soc.* **2006**, *128* (38), 12380-12381.
13. Konishi, A.; Hirao, Y.; Nakano, M.; Shimizu, A.; Botek, E.; Champagne, B.; Shiomi, D.; Sato, K.; Takui, T.; Matsumoto, K.; Kurata, H.; Kubo, T., Synthesis and characterization of teranthene: a singlet biradical polycyclic aromatic hydrocarbon having kekulé structures. *J. Am. Chem. Soc.* **2010**, *132* (32), 11021-11023.
14. Sun, Z.; Huang, K.-W.; Wu, J., Soluble and stable zethrenebis(dicarboximide) and its quinone. *Org. Lett.* **2010**, *12* (20), 4690-4693.

15. Rana, A.; Hong, Y.; Gopalakrishna, T. Y.; Phan, H.; Heng, T. S.; Yadav, P.; Ding, J.; Kim, D.; Wu, J., Stable expanded porphycene-based diradicaloid and tetraradicaloid. *Angew. Chem. Int. Ed.* **2018**, *57* (38), 12534-12537.
16. Benincori, T.; Appoloni, G.; Mussini, P. R.; Arnaboldi, S.; Cirilli, R.; Quartapelle Procopio, E.; Panigati, M.; Abbate, S.; Mazzeo, G.; Longhi, G., Searching for models exhibiting high circularly polarized luminescence: electroactive inherently chiral oligothiophenes. *Chem. Eur. J.* **2018**, *24* (43), 11082-11093.
17. Du, T.; Gao, R.; Deng, Y.; Wang, C.; Zhou, Q.; Geng, Y., Indandione-terminated quinoids: facile synthesis by alkoxide-mediated rearrangement reaction and semiconducting properties. *Angew. Chem. Int. Ed.* **2020**, *59* (1), 221-225.
18. Wang, M.; Hu, X.; Liu, P.; Li, W.; Gong, X.; Huang, F.; Cao, Y., Donor-acceptor conjugated polymer based on naphtho[1,2-c:5,6-c]bis[1,2,5]thiadiazole for high-performance polymer solar cells. *J. Am. Chem. Soc.* **2011**, *133* (25), 9638-9641.
19. Li, Y.; Li, L.; Wu, Y.; Li, Y., A review on the origin of synthetic metal radical: singlet open-shell radical ground state? *J. Phys. Chem. C* **2017**, *121* (15), 8579-8588.
20. Canola S, Casado J, Negri F. The double exciton state of conjugated chromophores with strong diradical character: insights from TDDFT calculations. *Phys. Chem. Chem. Phys.* **2018**, *20* (37), 24227-24238.
21. Noodleman L. Valence bond description of antiferromagnetic coupling in transition metal dimers. *J. Chem. Phys.* 1981, *74*(10), 5737-5743.
22. Rudebusch GE, Zafra JL, Jorner K, Fukuda K, Marshall JL, Arrechea-Marcos I, Espejo GL, Ortiz RP, Gómez-García CJ, Zakharov LN, Nakano M, Ottosson H, Casado, J and Haley, MM. Diindeno-fusion of an anthracene as a design strategy for stable organic biradicals. *Nat. Chem.* **2016**, *8* (8), 753-759.
23. Dressler JJ, Teraoka M, Espejo GL, Kishi R, Takamuku S, Gómez-García CJ, Zakharov LN, Nakano M, Casado J, Haley MM. Thiophene and its sulfur inhibit indenoindenodibenzothiophene diradicals from low-energy lying thermal triplets. *Nat. Chem.* **2018**, *10*(11), 1134-1140.
24. Stuyver T, Chen B, Zeng T, Geerlings P, De Proft F, Hoffmann R. Do diradicals behave like radicals? *Chem. Rev.* **2019**, *119* (21), 11291-11351.
25. Sabuj MA, Huda MM, Rai N. Donor-acceptor conjugated macrocycles with polyradical character and global aromaticity. *Science* **2020**, *23*(11), 101675.
26. Sabuj MA, Huda MM, Sarap CS, Rai N. Benzobisthiadiazole-based high-spin donor-acceptor conjugated polymers with localized spin distribution. *Mater. Adv.* **2021**, *2*, 2943 - 2955.
27. Grimme S, Hansen A. A practicable real - space measure and visualization of static electron - correlation effects. *Angew. Chem. Int. Ed.* **2015**, *54*(42), 12308-12313.
28. Pérez-Guardiola A, Sandoval-Salinas ME, Casanova D, San-Fabián E, Pérez-Jiménez AJ, Sancho-García JC. The role of topology in organic molecules: origin and comparison of the radical character in linear and cyclic oligoacenes and related oligomers. *Phys. Chem. Chem. Phys.* **2018**, *20*(10), 7112-7124.
